# Supplementary material
Source: publisher figshare collection journal article supplement (https://gsajournals.figshare.com/ndownloader/files/33924887)
Supplement: Supplementary file 1 [file 33924887]

## Sheet: Cover
An interolog-based barley interactome as an integration framework for NLR immune signaling.
Valeria Velásquez-Zapata, J. Mitch Elmore, Greg Fuerst, Roger P. Wise
S3 Data. Disease modules and DE DM genes at Bgh penetration and haustorial development.
Column	Details
Label	module number
module_nodes_count	number of nodes in the module
module_edges_count	number of edges in the module
Bgh_SNP_count	number of markers from eQTLs
Bgh_eGene_count	number of eQTL associations
Bgh_SNP	gene IDs for the markers
Bgh_eGene	gene IDs for the eQTLs
Gene	gene IDs in the module
p-value	significance value for the enrichment of eQTLs
oddsratio	oddsratio value for the enrichment of eQTLs
FDR	false discovery rate value for the enrichment of eQTLs
DM DE genes
Column	Details
Gene	DM DE gene
Group	If unique at 16 HAI, 32 HAI or core
Description	DM DE gene description

## Sheet: Disease modules 16HAI
Label	module_nodes_count	module_edges_count	Bgh_SNP_count	Bgh_eGene_count	Bgh_SNP	Bgh_eGene	gene	p-value	oddsratio	FDR
1	869	2436	62	700	HORVU.MOREX.r2.7HG0539830,HORVU.MOREX.r2.6HG0459490,HORVU.MOREX.r2.4HG0346920,HORVU.MOREX.r2.UnG0631250,HORVU.MOREX.r2.7HG0540300,HORVU.MOREX.r2.4HG0340600,HORVU.MOREX.r2.3HG0253360,HORVU.MOREX.r2.4HG0340130,HORVU.MOREX.r2.4HG0340300,HORVU.MOREX.r2.3HG0254010,HORVU.MOREX.r2.6HG0458560,HORVU.MOREX.r2.6HG0458440,HORVU.MOREX.r2.2HG0178800,HORVU.MOREX.r2.1HG0078540,HORVU.MOREX.r2.2HG0152600,HORVU.MOR…	HORVU.MOREX.r2.1HG0043210,HORVU.MOREX.r2.2HG0131440,HORVU.MOREX.r2.3HG0187780,HORVU.MOREX.r2.3HG0211850,HORVU.MOREX.r2.2HG0145240,HORVU.MOREX.r2.7HG0615710,HORVU.MOREX.r2.7HG0535390,HORVU.MOREX.r2.7HG0608730,HORVU.MOREX.r2.6HG0492200,HORVU.MOREX.r2.2HG0111090,HORVU.MOREX.r2.1HG0032660,HORVU.MOREX.r2.5HG0445890,HORVU.MOREX.r2.5HG0370130,HORVU.MOREX.r2.2HG0091540,HORVU.MOREX.r2.5HG0356800,HORVU.MOR…	HORVU.MOREX.r2.7HG0598710,HORVU.MOREX.r2.1HG0043210,HORVU.MOREX.r2.7HG0615710,HORVU.MOREX.r2.3HG0187780,HORVU.MOREX.r2.3HG0211850,HORVU.MOREX.r2.2HG0145240,HORVU.MOREX.r2.2HG0131440,HORVU.MOREX.r2.7HG0535390,HORVU.MOREX.r2.7HG0608730,HORVU.MOREX.r2.6HG0492200,HORVU.MOREX.r2.2HG0111090,HORVU.MOREX.r2.3HG0227720,HORVU.MOREX.r2.1HG0032660,HORVU.MOREX.r2.2HG0129340,HORVU.MOREX.r2.5HG0370130,HORVU.MOR…	3.31882e-245	13.5803	5.70838e-243
2	224	409	19	180	HORVU.MOREX.r2.2HG0180770,HORVU.MOREX.r2.5HG0440620,HORVU.MOREX.r2.3HG0182360,HORVU.MOREX.r2.3HG0182040,HORVU.MOREX.r2.2HG0092990,HORVU.MOREX.r2.2HG0092100,HORVU.MOREX.r2.5HG0440460,HORVU.MOREX.r2.2HG0147820,HORVU.MOREX.r2.3HG0189810,HORVU.MOREX.r2.3HG0189800,HORVU.MOREX.r2.2HG0147840,HORVU.MOREX.r2.2HG0178800,HORVU.MOREX.r2.2HG0092260,HORVU.MOREX.r2.2HG0092580,HORVU.MOREX.r2.2HG0178910,HORVU.MOR…	HORVU.MOREX.r2.5HG0357530,HORVU.MOREX.r2.4HG0335530,HORVU.MOREX.r2.1HG0072360,HORVU.MOREX.r2.5HG0442740,HORVU.MOREX.r2.5HG0413510,HORVU.MOREX.r2.5HG0357040,HORVU.MOREX.r2.5HG0388330,HORVU.MOREX.r2.7HG0539660,HORVU.MOREX.r2.2HG0167960,HORVU.MOREX.r2.4HG0318530,HORVU.MOREX.r2.6HG0459300,HORVU.MOREX.r2.7HG0556180,HORVU.MOREX.r2.1HG0059060,HORVU.MOREX.r2.3HG0182460,HORVU.MOREX.r2.3HG0258450,HORVU.MOR…	HORVU.MOREX.r2.5HG0357530,HORVU.MOREX.r2.4HG0335530,HORVU.MOREX.r2.1HG0072360,HORVU.MOREX.r2.5HG0442740,HORVU.MOREX.r2.5HG0413510,HORVU.MOREX.r2.5HG0357040,HORVU.MOREX.r2.5HG0388330,HORVU.MOREX.r2.7HG0539660,HORVU.MOREX.r2.2HG0167960,HORVU.MOREX.r2.4HG0318530,HORVU.MOREX.r2.6HG0459300,HORVU.MOREX.r2.5HG0364830,HORVU.MOREX.r2.7HG0556180,HORVU.MOREX.r2.1HG0059060,HORVU.MOREX.r2.3HG0182460,HORVU.MOR…	1.58215e-58	10.6834	1.36065e-56
3	237	588	42	169	HORVU.MOREX.r2.3HG0205560,HORVU.MOREX.r2.2HG0173950,HORVU.MOREX.r2.1HG0074000,HORVU.MOREX.r2.3HG0274770,HORVU.MOREX.r2.7HG0531920,HORVU.MOREX.r2.2HG0178800,HORVU.MOREX.r2.7HG0530990,HORVU.MOREX.r2.2HG0179230,HORVU.MOREX.r2.2HG0171170,HORVU.MOREX.r2.2HG0173750,HORVU.MOREX.r2.3HG0259440,HORVU.MOREX.r2.2HG0171780,HORVU.MOREX.r2.2HG0178910,HORVU.MOREX.r2.7HG0534740,HORVU.MOREX.r2.2HG0170590,HORVU.MOR…	HORVU.MOREX.r2.2HG0176800,HORVU.MOREX.r2.5HG0397720,HORVU.MOREX.r2.7HG0531910,HORVU.MOREX.r2.2HG0170570,HORVU.MOREX.r2.2HG0113220,HORVU.MOREX.r2.7HG0534870,HORVU.MOREX.r2.5HG0399260,HORVU.MOREX.r2.4HG0317020,HORVU.MOREX.r2.7HG0535010,HORVU.MOREX.r2.2HG0100210,HORVU.MOREX.r2.5HG0420450,HORVU.MOREX.r2.3HG0241880,HORVU.MOREX.r2.3HG0269260,HORVU.MOREX.r2.5HG0418770,HORVU.MOREX.r2.5HG0443720,HORVU.MOR…	HORVU.MOREX.r2.2HG0176800,HORVU.MOREX.r2.5HG0397720,HORVU.MOREX.r2.7HG0531910,HORVU.MOREX.r2.6HG0461750,HORVU.MOREX.r2.2HG0170570,HORVU.MOREX.r2.2HG0113220,HORVU.MOREX.r2.7HG0534870,HORVU.MOREX.r2.5HG0399260,HORVU.MOREX.r2.4HG0317020,HORVU.MOREX.r2.7HG0535010,HORVU.MOREX.r2.2HG0100210,HORVU.MOREX.r2.5HG0420450,HORVU.MOREX.r2.3HG0241880,HORVU.MOREX.r2.3HG0269260,HORVU.MOREX.r2.5HG0418770,HORVU.MOR…	2.43425e-42	6.43523	1.39564e-40
4	598	3589	78	69	HORVU.MOREX.r2.5HG0350790,HORVU.MOREX.r2.3HG0259240,HORVU.MOREX.r2.1HG0073610,HORVU.MOREX.r2.4HG0321730,HORVU.MOREX.r2.5HG0398100,HORVU.MOREX.r2.7HG0533530,HORVU.MOREX.r2.2HG0181050,HORVU.MOREX.r2.1HG0074000,HORVU.MOREX.r2.3HG0192480,HORVU.MOREX.r2.5HG0350450,HORVU.MOREX.r2.3HG0193280,HORVU.MOREX.r2.3HG0274770,HORVU.MOREX.r2.5HG0398680,HORVU.MOREX.r2.6HG0497600,HORVU.MOREX.r2.4HG0321340,HORVU.MOR…	HORVU.MOREX.r2.5HG0350570,HORVU.MOREX.r2.5HG0350440,HORVU.MOREX.r2.5HG0420070,HORVU.MOREX.r2.3HG0249370,HORVU.MOREX.r2.5HG0399610,HORVU.MOREX.r2.5HG0350120,HORVU.MOREX.r2.6HG0506710,HORVU.MOREX.r2.3HG0275630,HORVU.MOREX.r2.1HG0073230,HORVU.MOREX.r2.1HG0057670,HORVU.MOREX.r2.2HG0177800,HORVU.MOREX.r2.3HG0240960,HORVU.MOREX.r2.7HG0592090,HORVU.MOREX.r2.1HG0003770,HORVU.MOREX.r2.4HG0320470,HORVU.MOR…	HORVU.MOREX.r2.6HG0459740,HORVU.MOREX.r2.2HG0178310,HORVU.MOREX.r2.5HG0386430,HORVU.MOREX.r2.2HG0111410,HORVU.MOREX.r2.3HG0241460,HORVU.MOREX.r2.3HG0265990,HORVU.MOREX.r2.6HG0468110,HORVU.MOREX.r2.1HG0042180,HORVU.MOREX.r2.3HG0253580,HORVU.MOREX.r2.7HG0609260,HORVU.MOREX.r2.2HG0108430,HORVU.MOREX.r2.1HG0026570,HORVU.MOREX.r2.3HG0252040,HORVU.MOREX.r2.3HG0218160,HORVU.MOREX.r2.2HG0088550,HORVU.MOR…	6.05742e-26	0.299858	2.60469e-24
5	259	2665	26	13	HORVU.MOREX.r2.5HG0447180,HORVU.MOREX.r2.5HG0447510,HORVU.MOREX.r2.4HG0291260,HORVU.MOREX.r2.3HG0247870,HORVU.MOREX.r2.3HG0247690,HORVU.MOREX.r2.3HG0274770,HORVU.MOREX.r2.5HG0446980,HORVU.MOREX.r2.2HG0178800,HORVU.MOREX.r2.2HG0179230,HORVU.MOREX.r2.1HG0001710,HORVU.MOREX.r2.3HG0247740,HORVU.MOREX.r2.1HG0002560,HORVU.MOREX.r2.2HG0178910,HORVU.MOREX.r2.3HG0274800,HORVU.MOREX.r2.UnG0630370,HORVU.MOR…	HORVU.MOREX.r2.5HG0393330,HORVU.MOREX.r2.4HG0323930,HORVU.MOREX.r2.5HG0393010,HORVU.MOREX.r2.3HG0194760,HORVU.MOREX.r2.7HG0594220,HORVU.MOREX.r2.5HG0426900,HORVU.MOREX.r2.3HG0248400,HORVU.MOREX.r2.5HG0349250,HORVU.MOREX.r2.7HG0549740,HORVU.MOREX.r2.5HG0447780,HORVU.MOREX.r2.3HG0275630,HORVU.MOREX.r2.2HG0146410,HORVU.MOREX.r2.2HG0110800	HORVU.MOREX.r2.7HG0603930,HORVU.MOREX.r2.5HG0426350,HORVU.MOREX.r2.5HG0386430,HORVU.MOREX.r2.4HG0337780,HORVU.MOREX.r2.3HG0246390,HORVU.MOREX.r2.2HG0080060,HORVU.MOREX.r2.7HG0559160,HORVU.MOREX.r2.6HG0483230,HORVU.MOREX.r2.2HG0139460,HORVU.MOREX.r2.2HG0152550,HORVU.MOREX.r2.5HG0439340,HORVU.MOREX.r2.2HG0096300,HORVU.MOREX.r2.7HG0593260,HORVU.MOREX.r2.6HG0483210,HORVU.MOREX.r2.4HG0281220,HORVU.MOR…	4.82739e-23	0.124703	1.66062e-21
6	625	583	133	87	HORVU.MOREX.r2.3HG0270250,HORVU.MOREX.r2.3HG0210420,HORVU.MOREX.r2.5HG0384050,HORVU.MOREX.r2.3HG0209090,HORVU.MOREX.r2.5HG0374410,HORVU.MOREX.r2.7HG0531920,HORVU.MOREX.r2.5HG0349820,HORVU.MOREX.r2.5HG0375540,HORVU.MOREX.r2.1HG0033160,HORVU.MOREX.r2.5HG0381090,HORVU.MOREX.r2.3HG0229390,HORVU.MOREX.r2.2HG0115460,HORVU.MOREX.r2.3HG0226630,HORVU.MOREX.r2.4HG0335300,HORVU.MOREX.r2.5HG0385900,HORVU.MOR…	HORVU.MOREX.r2.4HG0334150,HORVU.MOREX.r2.7HG0594960,HORVU.MOREX.r2.3HG0235650,HORVU.MOREX.r2.3HG0258450,HORVU.MOREX.r2.1HG0056380,HORVU.MOREX.r2.5HG0368480,HORVU.MOREX.r2.7HG0542800,HORVU.MOREX.r2.3HG0214490,HORVU.MOREX.r2.3HG0232520,HORVU.MOREX.r2.3HG0251720,HORVU.MOREX.r2.3HG0224350,HORVU.MOREX.r2.1HG0018500,HORVU.MOREX.r2.5HG0391760,HORVU.MOREX.r2.5HG0426280,HORVU.MOREX.r2.4HG0309820,HORVU.MOR…	HORVU.MOREX.r2.6HG0464060,HORVU.MOREX.r2.4HG0326110,HORVU.MOREX.r2.7HG0606560,HORVU.MOREX.r2.4HG0284720,HORVU.MOREX.r2.4HG0298180,HORVU.MOREX.r2.3HG0252690,HORVU.MOREX.r2.4HG0276750,HORVU.MOREX.r2.4HG0283660,HORVU.MOREX.r2.7HG0615090,HORVU.MOREX.r2.UnG0626220,HORVU.MOREX.r2.2HG0111000,HORVU.MOREX.r2.5HG0434930,HORVU.MOREX.r2.3HG0238770,HORVU.MOREX.r2.UnG0627650,HORVU.MOREX.r2.2HG0160140,HORVU.MOR…	5.14594e-20	0.373885	1.47517e-18
7	216	416	15	11	HORVU.MOREX.r2.2HG0180770,HORVU.MOREX.r2.2HG0178800,HORVU.MOREX.r2.1HG0078680,HORVU.MOREX.r2.2HG0178910,HORVU.MOREX.r2.2HG0174990,HORVU.MOREX.r2.2HG0176000,HORVU.MOREX.r2.2HG0175600,HORVU.MOREX.r2.1HG0078550,HORVU.MOREX.r2.1HG0078540,HORVU.MOREX.r2.2HG0176780,HORVU.MOREX.r2.1HG0078050,HORVU.MOREX.r2.UnG0630240,HORVU.MOREX.r2.2HG0179230,HORVU.MOREX.r2.2HG0181050,HORVU.MOREX.r2.1HG0078200	HORVU.MOREX.r2.1HG0013310,HORVU.MOREX.r2.6HG0501040,HORVU.MOREX.r2.1HG0078310,HORVU.MOREX.r2.3HG0212900,HORVU.MOREX.r2.2HG0179990,HORVU.MOREX.r2.6HG0500890,HORVU.MOREX.r2.1HG0078210,HORVU.MOREX.r2.3HG0273910,HORVU.MOREX.r2.5HG0390420,HORVU.MOREX.r2.5HG0413530,HORVU.MOREX.r2.2HG0134380	HORVU.MOREX.r2.4HG0319540,HORVU.MOREX.r2.4HG0323110,HORVU.MOREX.r2.1HG0015100,HORVU.MOREX.r2.2HG0098800,HORVU.MOREX.r2.6HG0457980,HORVU.MOREX.r2.6HG0500390,HORVU.MOREX.r2.5HG0383720,HORVU.MOREX.r2.6HG0506770,HORVU.MOREX.r2.2HG0107970,HORVU.MOREX.r2.4HG0339840,HORVU.MOREX.r2.5HG0412700,HORVU.MOREX.r2.3HG0272870,HORVU.MOREX.r2.6HG0471620,HORVU.MOREX.r2.1HG0078310,HORVU.MOREX.r2.3HG0221170,HORVU.MOR…	2.87046e-19	0.127389	7.05313e-18
8	188	4225	9	8	HORVU.MOREX.r2.5HG0409860,HORVU.MOREX.r2.2HG0178910,HORVU.MOREX.r2.7HG0612060,HORVU.MOREX.r2.7HG0612250,HORVU.MOREX.r2.2HG0178800,HORVU.MOREX.r2.2HG0149940,HORVU.MOREX.r2.5HG0409840,HORVU.MOREX.r2.2HG0179230,HORVU.MOREX.r2.7HG0612170	HORVU.MOREX.r2.2HG0150190,HORVU.MOREX.r2.5HG0409680,HORVU.MOREX.r2.5HG0409940,HORVU.MOREX.r2.2HG0137370,HORVU.MOREX.r2.6HG0523070,HORVU.MOREX.r2.5HG0370130,HORVU.MOREX.r2.7HG0612090,HORVU.MOREX.r2.6HG0505700	HORVU.MOREX.r2.3HG0245960,HORVU.MOREX.r2.2HG0152320,HORVU.MOREX.r2.2HG0103970,HORVU.MOREX.r2.2HG0159710,HORVU.MOREX.r2.7HG0580390,HORVU.MOREX.r2.1HG0018040,HORVU.MOREX.r2.7HG0528960,HORVU.MOREX.r2.5HG0370130,HORVU.MOREX.r2.5HG0437010,HORVU.MOREX.r2.7HG0577670,HORVU.MOREX.r2.6HG0479200,HORVU.MOREX.r2.5HG0431510,HORVU.MOREX.r2.3HG0250830,HORVU.MOREX.r2.3HG0232160,HORVU.MOREX.r2.3HG0252910,HORVU.MOR…	2.89872e-18	0.105827	6.23224e-17
9	101	158	6	4	HORVU.MOREX.r2.2HG0178910,HORVU.MOREX.r2.2HG0176000,HORVU.MOREX.r2.2HG0175600,HORVU.MOREX.r2.2HG0178800,HORVU.MOREX.r2.2HG0176780,HORVU.MOREX.r2.2HG0179230	HORVU.MOREX.r2.1HG0061210,HORVU.MOREX.r2.1HG0065080,HORVU.MOREX.r2.6HG0501850,HORVU.MOREX.r2.6HG0520780	HORVU.MOREX.r2.7HG0607670,HORVU.MOREX.r2.6HG0462060,HORVU.MOREX.r2.6HG0524990,HORVU.MOREX.r2.2HG0117980,HORVU.MOREX.r2.1HG0044600,HORVU.MOREX.r2.2HG0103970,HORVU.MOREX.r2.6HG0481770,HORVU.MOREX.r2.2HG0092650,HORVU.MOREX.r2.1HG0065080,HORVU.MOREX.r2.1HG0069590,HORVU.MOREX.r2.6HG0511000,HORVU.MOREX.r2.6HG0458830,HORVU.MOREX.r2.1HG0073710,HORVU.MOREX.r2.4HG0278140,HORVU.MOREX.r2.2HG0099960,HORVU.MOR…	1.40209e-10	0.0993808	2.35162e-09
10	108	1706	10	5	HORVU.MOREX.r2.2HG0178910,HORVU.MOREX.r2.5HG0445740,HORVU.MOREX.r2.5HG0446070,HORVU.MOREX.r2.4HG0337620,HORVU.MOREX.r2.5HG0446780,HORVU.MOREX.r2.2HG0146390,HORVU.MOREX.r2.2HG0178800,HORVU.MOREX.r2.2HG0146290,HORVU.MOREX.r2.4HG0337730,HORVU.MOREX.r2.2HG0179230	HORVU.MOREX.r2.4HG0337290,HORVU.MOREX.r2.3HG0214490,HORVU.MOREX.r2.7HG0592250,HORVU.MOREX.r2.5HG0447070,HORVU.MOREX.r2.2HG0146120	HORVU.MOREX.r2.2HG0107860,HORVU.MOREX.r2.4HG0330680,HORVU.MOREX.r2.2HG0129920,HORVU.MOREX.r2.1HG0023540,HORVU.MOREX.r2.4HG0321040,HORVU.MOREX.r2.1HG0019660,HORVU.MOREX.r2.7HG0558720,HORVU.MOREX.r2.3HG0214280,HORVU.MOREX.r2.6HG0520000,HORVU.MOREX.r2.2HG0088730,HORVU.MOREX.r2.4HG0338920,HORVU.MOREX.r2.5HG0409440,HORVU.MOREX.r2.4HG0283040,HORVU.MOREX.r2.7HG0549490,HORVU.MOREX.r2.7HG0593380,HORVU.MOR…	1.44962e-10	0.116921	2.35162e-09
11	116	231	7	6	HORVU.MOREX.r2.2HG0178910,HORVU.MOREX.r2.7HG0623230,HORVU.MOREX.r2.2HG0176000,HORVU.MOREX.r2.2HG0175600,HORVU.MOREX.r2.2HG0178800,HORVU.MOREX.r2.2HG0176780,HORVU.MOREX.r2.2HG0179230	HORVU.MOREX.r2.6HG0504420,HORVU.MOREX.r2.UnG0626100,HORVU.MOREX.r2.1HG0042000,HORVU.MOREX.r2.7HG0622280,HORVU.MOREX.r2.7HG0623210,HORVU.MOREX.r2.4HG0283500	HORVU.MOREX.r2.4HG0292190,HORVU.MOREX.r2.4HG0327390,HORVU.MOREX.r2.6HG0514130,HORVU.MOREX.r2.4HG0288270,HORVU.MOREX.r2.3HG0257030,HORVU.MOREX.r2.5HG0385220,HORVU.MOREX.r2.2HG0152680,HORVU.MOREX.r2.4HG0290970,HORVU.MOREX.r2.7HG0535400,HORVU.MOREX.r2.7HG0599740,HORVU.MOREX.r2.6HG0505660,HORVU.MOREX.r2.3HG0263170,HORVU.MOREX.r2.6HG0495960,HORVU.MOREX.r2.5HG0421580,HORVU.MOREX.r2.5HG0401530,HORVU.MOR…	1.50394e-10	0.131278	2.35162e-09
12	106	112	8	5	HORVU.MOREX.r2.2HG0094680,HORVU.MOREX.r2.2HG0178910,HORVU.MOREX.r2.2HG0178800,HORVU.MOREX.r2.6HG0507380,HORVU.MOREX.r2.6HG0507060,HORVU.MOREX.r2.2HG0179230,HORVU.MOREX.r2.6HG0509490,HORVU.MOREX.r2.6HG0507040	HORVU.MOREX.r2.4HG0317680,HORVU.MOREX.r2.2HG0096020,HORVU.MOREX.r2.2HG0131360,HORVU.MOREX.r2.6HG0509500,HORVU.MOREX.r2.2HG0094920	HORVU.MOREX.r2.2HG0127000,HORVU.MOREX.r2.5HG0447000,HORVU.MOREX.r2.3HG0256320,HORVU.MOREX.r2.6HG0499920,HORVU.MOREX.r2.7HG0583610,HORVU.MOREX.r2.4HG0286180,HORVU.MOREX.r2.7HG0538290,HORVU.MOREX.r2.2HG0142700,HORVU.MOREX.r2.5HG0412850,HORVU.MOREX.r2.5HG0388560,HORVU.MOREX.r2.3HG0184170,HORVU.MOREX.r2.7HG0587840,HORVU.MOREX.r2.2HG0154910,HORVU.MOREX.r2.1HG0016720,HORVU.MOREX.r2.1HG0009350,HORVU.MOR…	3.81753e-10	0.119275	5.4718e-09
13	120	1590	11	8	HORVU.MOREX.r2.2HG0180770,HORVU.MOREX.r2.2HG0178910,HORVU.MOREX.r2.1HG0075930,HORVU.MOREX.r2.2HG0176000,HORVU.MOREX.r2.2HG0175600,HORVU.MOREX.r2.2HG0178800,HORVU.MOREX.r2.1HG0075910,HORVU.MOREX.r2.2HG0176780,HORVU.MOREX.r2.2HG0179230,HORVU.MOREX.r2.2HG0181050,HORVU.MOREX.r2.3HG0254820	HORVU.MOREX.r2.6HG0476340,HORVU.MOREX.r2.1HG0053440,HORVU.MOREX.r2.1HG0075250,HORVU.MOREX.r2.5HG0388410,HORVU.MOREX.r2.5HG0387610,HORVU.MOREX.r2.7HG0594100,HORVU.MOREX.r2.3HG0249180,HORVU.MOREX.r2.4HG0341280	HORVU.MOREX.r2.4HG0291510,HORVU.MOREX.r2.3HG0202840,HORVU.MOREX.r2.5HG0421990,HORVU.MOREX.r2.2HG0137840,HORVU.MOREX.r2.3HG0242960,HORVU.MOREX.r2.2HG0146300,HORVU.MOREX.r2.3HG0195450,HORVU.MOREX.r2.7HG0594100,HORVU.MOREX.r2.6HG0481830,HORVU.MOREX.r2.4HG0288170,HORVU.MOREX.r2.1HG0044410,HORVU.MOREX.r2.3HG0258470,HORVU.MOREX.r2.2HG0155650,HORVU.MOREX.r2.3HG0209880,HORVU.MOREX.r2.1HG0055720,HORVU.MOR…	1.4864e-09	0.171991	1.96662e-08
14	118	674	7	8	HORVU.MOREX.r2.2HG0180770,HORVU.MOREX.r2.5HG0392190,HORVU.MOREX.r2.2HG0178910,HORVU.MOREX.r2.2HG0178800,HORVU.MOREX.r2.2HG0179230,HORVU.MOREX.r2.2HG0181050,HORVU.MOREX.r2.1HG0078080	HORVU.MOREX.r2.5HG0382520,HORVU.MOREX.r2.7HG0561840,HORVU.MOREX.r2.1HG0039750,HORVU.MOREX.r2.1HG0041280,HORVU.MOREX.r2.5HG0397940,HORVU.MOREX.r2.3HG0236190,HORVU.MOREX.r2.2HG0118450,HORVU.MOREX.r2.2HG0141130	HORVU.MOREX.r2.1HG0066220,HORVU.MOREX.r2.7HG0584220,HORVU.MOREX.r2.6HG0490110,HORVU.MOREX.r2.7HG0585500,HORVU.MOREX.r2.2HG0132110,HORVU.MOREX.r2.5HG0369750,HORVU.MOREX.r2.2HG0093330,HORVU.MOREX.r2.1HG0072790,HORVU.MOREX.r2.3HG0243530,HORVU.MOREX.r2.4HG0330120,HORVU.MOREX.r2.4HG0324790,HORVU.MOREX.r2.5HG0386930,HORVU.MOREX.r2.5HG0421790,HORVU.MOREX.r2.2HG0093470,HORVU.MOREX.r2.6HG0452850,HORVU.MOR…	2.26924e-09	0.175175	2.78792e-08
15	188	202	27	21	HORVU.MOREX.r2.4HG0321060,HORVU.MOREX.r2.4HG0320920,HORVU.MOREX.r2.4HG0321730,HORVU.MOREX.r2.4HG0321200,HORVU.MOREX.r2.6HG0451050,HORVU.MOREX.r2.4HG0321340,HORVU.MOREX.r2.2HG0178800,HORVU.MOREX.r2.3HG0268390,HORVU.MOREX.r2.1HG0052770,HORVU.MOREX.r2.6HG0451070,HORVU.MOREX.r2.2HG0179230,HORVU.MOREX.r2.6HG0450740,HORVU.MOREX.r2.2HG0143420,HORVU.MOREX.r2.3HG0268400,HORVU.MOREX.r2.2HG0178910,HORVU.MOR…	HORVU.MOREX.r2.5HG0386630,HORVU.MOREX.r2.1HG0012450,HORVU.MOREX.r2.3HG0267870,HORVU.MOREX.r2.6HG0476320,HORVU.MOREX.r2.7HG0596940,HORVU.MOREX.r2.7HG0535440,HORVU.MOREX.r2.4HG0343650,HORVU.MOREX.r2.7HG0568840,HORVU.MOREX.r2.6HG0450400,HORVU.MOREX.r2.4HG0328620,HORVU.MOREX.r2.5HG0364690,HORVU.MOREX.r2.4HG0321350,HORVU.MOREX.r2.6HG0476760,HORVU.MOREX.r2.3HG0254340,HORVU.MOREX.r2.1HG0053340,HORVU.MOR…	HORVU.MOREX.r2.5HG0386630,HORVU.MOREX.r2.4HG0332580,HORVU.MOREX.r2.1HG0068780,HORVU.MOREX.r2.3HG0195810,HORVU.MOREX.r2.3HG0254340,HORVU.MOREX.r2.6HG0459050,HORVU.MOREX.r2.2HG0143770,HORVU.MOREX.r2.5HG0385100,HORVU.MOREX.r2.4HG0333460,HORVU.MOREX.r2.5HG0422890,HORVU.MOREX.r2.6HG0515710,HORVU.MOREX.r2.2HG0142700,HORVU.MOREX.r2.5HG0401430,HORVU.MOREX.r2.4HG0278940,HORVU.MOREX.r2.3HG0249890,HORVU.MOR…	4.54791e-09	0.301607	5.21493e-08
16	146	77	20	14	HORVU.MOREX.r2.2HG0180770,HORVU.MOREX.r2.3HG0270250,HORVU.MOREX.r2.4HG0345440,HORVU.MOREX.r2.2HG0171780,HORVU.MOREX.r2.2HG0172070,HORVU.MOREX.r2.2HG0178910,HORVU.MOREX.r2.6HG0513640,HORVU.MOREX.r2.2HG0172410,HORVU.MOREX.r2.2HG0171620,HORVU.MOREX.r2.3HG0271590,HORVU.MOREX.r2.3HG0271180,HORVU.MOREX.r2.2HG0178800,HORVU.MOREX.r2.3HG0270990,HORVU.MOREX.r2.3HG0269970,HORVU.MOREX.r2.4HG0345290,HORVU.MOR…	HORVU.MOREX.r2.2HG0147460,HORVU.MOREX.r2.5HG0370110,HORVU.MOREX.r2.2HG0171960,HORVU.MOREX.r2.2HG0170860,HORVU.MOREX.r2.3HG0214090,HORVU.MOREX.r2.4HG0321130,HORVU.MOREX.r2.3HG0252190,HORVU.MOREX.r2.4HG0345700,HORVU.MOREX.r2.2HG0151330,HORVU.MOREX.r2.3HG0225730,HORVU.MOREX.r2.6HG0513490,HORVU.MOREX.r2.3HG0229440,HORVU.MOREX.r2.3HG0272400,HORVU.MOREX.r2.3HG0206450	HORVU.MOREX.r2.3HG0272760,HORVU.MOREX.r2.7HG0589160,HORVU.MOREX.r2.3HG0217590,HORVU.MOREX.r2.4HG0341200,HORVU.MOREX.r2.2HG0147460,HORVU.MOREX.r2.7HG0547330,HORVU.MOREX.r2.3HG0248820,HORVU.MOREX.r2.2HG0155970,HORVU.MOREX.r2.7HG0531720,HORVU.MOREX.r2.2HG0171960,HORVU.MOREX.r2.4HG0278940,HORVU.MOREX.r2.3HG0188890,HORVU.MOREX.r2.3HG0214090,HORVU.MOREX.r2.3HG0252190,HORVU.MOREX.r2.7HG0569740,HORVU.MOR…	1.76605e-08	0.255148	1.8985e-07
17	122	169	20	10	HORVU.MOREX.r2.2HG0180770,HORVU.MOREX.r2.3HG0205560,HORVU.MOREX.r2.3HG0205970,HORVU.MOREX.r2.3HG0207880,HORVU.MOREX.r2.3HG0208150,HORVU.MOREX.r2.6HG0509490,HORVU.MOREX.r2.2HG0178910,HORVU.MOREX.r2.4HG0340600,HORVU.MOREX.r2.4HG0340130,HORVU.MOREX.r2.4HG0340560,HORVU.MOREX.r2.4HG0340300,HORVU.MOREX.r2.3HG0232680,HORVU.MOREX.r2.2HG0178800,HORVU.MOREX.r2.3HG0222600,HORVU.MOREX.r2.6HG0507380,HORVU.MOR…	HORVU.MOREX.r2.5HG0400930,HORVU.MOREX.r2.6HG0490750,HORVU.MOREX.r2.6HG0509430,HORVU.MOREX.r2.1HG0009250,HORVU.MOREX.r2.6HG0509500,HORVU.MOREX.r2.5HG0398910,HORVU.MOREX.r2.3HG0209720,HORVU.MOREX.r2.4HG0340630,HORVU.MOREX.r2.6HG0507900,HORVU.MOREX.r2.6HG0507730	HORVU.MOREX.r2.4HG0319540,HORVU.MOREX.r2.7HG0557450,HORVU.MOREX.r2.3HG0199180,HORVU.MOREX.r2.3HG0240310,HORVU.MOREX.r2.3HG0256830,HORVU.MOREX.r2.3HG0209720,HORVU.MOREX.r2.3HG0260090,HORVU.MOREX.r2.3HG0235620,HORVU.MOREX.r2.4HG0294830,HORVU.MOREX.r2.2HG0166360,HORVU.MOREX.r2.5HG0363170,HORVU.MOREX.r2.2HG0128230,HORVU.MOREX.r2.7HG0560740,HORVU.MOREX.r2.2HG0131040,HORVU.MOREX.r2.5HG0398490,HORVU.MOR…	2.69677e-08	0.215158	2.7285e-07
18	77	110	6	3	HORVU.MOREX.r2.5HG0406980,HORVU.MOREX.r2.5HG0406340,HORVU.MOREX.r2.2HG0178910,HORVU.MOREX.r2.2HG0178800,HORVU.MOREX.r2.5HG0406790,HORVU.MOREX.r2.2HG0179230	HORVU.MOREX.r2.4HG0328620,HORVU.MOREX.r2.7HG0552530,HORVU.MOREX.r2.5HG0406220	HORVU.MOREX.r2.1HG0056090,HORVU.MOREX.r2.5HG0417590,HORVU.MOREX.r2.5HG0362130,HORVU.MOREX.r2.5HG0406220,HORVU.MOREX.r2.5HG0406610,HORVU.MOREX.r2.7HG0571570,HORVU.MOREX.r2.2HG0157120,HORVU.MOREX.r2.5HG0443670,HORVU.MOREX.r2.2HG0153170,HORVU.MOREX.r2.3HG0242970,HORVU.MOREX.r2.3HG0225050,HORVU.MOREX.r2.7HG0589100,HORVU.MOREX.r2.2HG0110340,HORVU.MOREX.r2.7HG0552530,HORVU.MOREX.r2.7HG0547510,HORVU.MOR…	3.46986e-08	0.0980301	3.31564e-07
19	91	431	10	6	HORVU.MOREX.r2.2HG0180770,HORVU.MOREX.r2.6HG0509490,HORVU.MOREX.r2.2HG0178910,HORVU.MOREX.r2.2HG0114200,HORVU.MOREX.r2.6HG0507380,HORVU.MOREX.r2.6HG0507060,HORVU.MOREX.r2.6HG0507040,HORVU.MOREX.r2.2HG0179230,HORVU.MOREX.r2.2HG0181050,HORVU.MOREX.r2.2HG0178800	HORVU.MOREX.r2.6HG0496940,HORVU.MOREX.r2.6HG0468640,HORVU.MOREX.r2.2HG0126140,HORVU.MOREX.r2.4HG0349080,HORVU.MOREX.r2.7HG0559890,HORVU.MOREX.r2.6HG0507900	HORVU.MOREX.r2.3HG0248140,HORVU.MOREX.r2.1HG0066370,HORVU.MOREX.r2.6HG0468640,HORVU.MOREX.r2.5HG0414380,HORVU.MOREX.r2.7HG0564570,HORVU.MOREX.r2.2HG0126140,HORVU.MOREX.r2.7HG0596460,HORVU.MOREX.r2.6HG0468620,HORVU.MOREX.r2.1HG0013930,HORVU.MOREX.r2.4HG0349080,HORVU.MOREX.r2.6HG0505960,HORVU.MOREX.r2.1HG0057520,HORVU.MOREX.r2.1HG0028780,HORVU.MOREX.r2.1HG0052610,HORVU.MOREX.r2.5HG0400700,HORVU.MOR…	1.51468e-07	0.170584	1.37119e-06
20	90	190	5	6	HORVU.MOREX.r2.2HG0180770,HORVU.MOREX.r2.2HG0178910,HORVU.MOREX.r2.2HG0178800,HORVU.MOREX.r2.2HG0181050,HORVU.MOREX.r2.2HG0179230	HORVU.MOREX.r2.5HG0413480,HORVU.MOREX.r2.3HG0263380,HORVU.MOREX.r2.6HG0509430,HORVU.MOREX.r2.6HG0522850,HORVU.MOREX.r2.5HG0424400,HORVU.MOREX.r2.5HG0430150	HORVU.MOREX.r2.3HG0264010,HORVU.MOREX.r2.3HG0258440,HORVU.MOREX.r2.4HG0347150,HORVU.MOREX.r2.3HG0213150,HORVU.MOREX.r2.3HG0247500,HORVU.MOREX.r2.6HG0509430,HORVU.MOREX.r2.6HG0498130,HORVU.MOREX.r2.1HG0011720,HORVU.MOREX.r2.4HG0295820,HORVU.MOREX.r2.5HG0424400,HORVU.MOREX.r2.5HG0383360,HORVU.MOREX.r2.7HG0544350,HORVU.MOREX.r2.5HG0383420,HORVU.MOREX.r2.4HG0279150,HORVU.MOREX.r2.3HG0226880,HORVU.MOR…	2.37975e-07	0.172642	2.04658e-06
21	102	92	43	9	HORVU.MOREX.r2.5HG0384030,HORVU.MOREX.r2.5HG0384050,HORVU.MOREX.r2.5HG0374410,HORVU.MOREX.r2.5HG0366280,HORVU.MOREX.r2.2HG0178800,HORVU.MOREX.r2.7HG0554060,HORVU.MOREX.r2.2HG0082340,HORVU.MOREX.r2.5HG0375540,HORVU.MOREX.r2.2HG0179230,HORVU.MOREX.r2.5HG0381870,HORVU.MOREX.r2.7HG0551080,HORVU.MOREX.r2.1HG0078740,HORVU.MOREX.r2.5HG0381090,HORVU.MOREX.r2.5HG0382660,HORVU.MOREX.r2.5HG0384070,HORVU.MOR…	HORVU.MOREX.r2.4HG0327760,HORVU.MOREX.r2.5HG0377440,HORVU.MOREX.r2.2HG0109030,HORVU.MOREX.r2.2HG0147880,HORVU.MOREX.r2.2HG0082400,HORVU.MOREX.r2.5HG0393300,HORVU.MOREX.r2.5HG0390480,HORVU.MOREX.r2.7HG0553750,HORVU.MOREX.r2.2HG0147700	HORVU.MOREX.r2.4HG0289910,HORVU.MOREX.r2.2HG0082400,HORVU.MOREX.r2.2HG0150700,HORVU.MOREX.r2.5HG0432550,HORVU.MOREX.r2.1HG0062280,HORVU.MOREX.r2.2HG0147700,HORVU.MOREX.r2.7HG0600060,HORVU.MOREX.r2.4HG0307680,HORVU.MOREX.r2.5HG0367260,HORVU.MOREX.r2.3HG0224180,HORVU.MOREX.r2.3HG0236320,HORVU.MOREX.r2.7HG0599900,HORVU.MOREX.r2.5HG0390480,HORVU.MOREX.r2.5HG0400090,HORVU.MOREX.r2.2HG0130210,HORVU.MOR…	8.49448e-07	0.233836	6.95739e-06
22	90	372	23	7	HORVU.MOREX.r2.5HG0398040,HORVU.MOREX.r2.5HG0397220,HORVU.MOREX.r2.5HG0398060,HORVU.MOREX.r2.2HG0178800,HORVU.MOREX.r2.2HG0179230,HORVU.MOREX.r2.5HG0396840,HORVU.MOREX.r2.2HG0178910,HORVU.MOREX.r2.5HG0396550,HORVU.MOREX.r2.5HG0396910,HORVU.MOREX.r2.5HG0394700,HORVU.MOREX.r2.2HG0176780,HORVU.MOREX.r2.5HG0393770,HORVU.MOREX.r2.5HG0394330,HORVU.MOREX.r2.6HG0458410,HORVU.MOREX.r2.5HG0393650,HORVU.MOR…	HORVU.MOREX.r2.5HG0446440,HORVU.MOREX.r2.6HG0489240,HORVU.MOREX.r2.1HG0019780,HORVU.MOREX.r2.6HG0458380,HORVU.MOREX.r2.5HG0394040,HORVU.MOREX.r2.1HG0014210,HORVU.MOREX.r2.4HG0324050	HORVU.MOREX.r2.5HG0446440,HORVU.MOREX.r2.5HG0415620,HORVU.MOREX.r2.7HG0560390,HORVU.MOREX.r2.6HG0490880,HORVU.MOREX.r2.4HG0325570,HORVU.MOREX.r2.5HG0357690,HORVU.MOREX.r2.4HG0301340,HORVU.MOREX.r2.5HG0385050,HORVU.MOREX.r2.6HG0457310,HORVU.MOREX.r2.6HG0474430,HORVU.MOREX.r2.5HG0365170,HORVU.MOREX.r2.4HG0305230,HORVU.MOREX.r2.4HG0312260,HORVU.MOREX.r2.1HG0014210,HORVU.MOREX.r2.3HG0254440,HORVU.MOR…	9.8756e-07	0.203956	7.72093e-06
23	108	68	22	11	HORVU.MOREX.r2.4HG0291260,HORVU.MOREX.r2.4HG0336430,HORVU.MOREX.r2.5HG0356760,HORVU.MOREX.r2.2HG0178800,HORVU.MOREX.r2.2HG0179230,HORVU.MOREX.r2.1HG0001710,HORVU.MOREX.r2.UnG0624320,HORVU.MOREX.r2.1HG0002560,HORVU.MOREX.r2.2HG0178910,HORVU.MOREX.r2.4HG0316710,HORVU.MOREX.r2.3HG0212490,HORVU.MOREX.r2.4HG0336570,HORVU.MOREX.r2.2HG0090790,HORVU.MOREX.r2.2HG0180770,HORVU.MOREX.r2.1HG0002570,HORVU.MOR…	HORVU.MOREX.r2.7HG0546690,HORVU.MOREX.r2.6HG0485270,HORVU.MOREX.r2.5HG0356590,HORVU.MOREX.r2.6HG0451760,HORVU.MOREX.r2.4HG0336640,HORVU.MOREX.r2.2HG0081060,HORVU.MOREX.r2.3HG0249940,HORVU.MOREX.r2.5HG0356770,HORVU.MOREX.r2.2HG0148400,HORVU.MOREX.r2.2HG0092980,HORVU.MOREX.r2.3HG0221330	HORVU.MOREX.r2.5HG0433190,HORVU.MOREX.r2.7HG0616770,HORVU.MOREX.r2.6HG0521040,HORVU.MOREX.r2.5HG0432740,HORVU.MOREX.r2.4HG0331370,HORVU.MOREX.r2.6HG0485270,HORVU.MOREX.r2.1HG0009310,HORVU.MOREX.r2.7HG0602420,HORVU.MOREX.r2.4HG0346900,HORVU.MOREX.r2.5HG0401830,HORVU.MOREX.r2.7HG0603950,HORVU.MOREX.r2.4HG0290130,HORVU.MOREX.r2.3HG0183870,HORVU.MOREX.r2.7HG0591810,HORVU.MOREX.r2.1HG0036000,HORVU.MOR…	3.07744e-06	0.274051	2.30139e-05
24	112	464	47	12	HORVU.MOREX.r2.5HG0384030,HORVU.MOREX.r2.1HG0064450,HORVU.MOREX.r2.5HG0384050,HORVU.MOREX.r2.5HG0376150,HORVU.MOREX.r2.5HG0374410,HORVU.MOREX.r2.5HG0366280,HORVU.MOREX.r2.2HG0178800,HORVU.MOREX.r2.5HG0375540,HORVU.MOREX.r2.2HG0094240,HORVU.MOREX.r2.5HG0381870,HORVU.MOREX.r2.6HG0502370,HORVU.MOREX.r2.5HG0381090,HORVU.MOREX.r2.5HG0382660,HORVU.MOREX.r2.6HG0502880,HORVU.MOREX.r2.5HG0384070,HORVU.MOR…	HORVU.MOREX.r2.2HG0085780,HORVU.MOREX.r2.1HG0023130,HORVU.MOREX.r2.5HG0369640,HORVU.MOREX.r2.2HG0101880,HORVU.MOREX.r2.4HG0315770,HORVU.MOREX.r2.1HG0011100,HORVU.MOREX.r2.2HG0106020,HORVU.MOREX.r2.3HG0190930,HORVU.MOREX.r2.1HG0064380,HORVU.MOREX.r2.1HG0050550,HORVU.MOREX.r2.2HG0171440,HORVU.MOREX.r2.5HG0377400	HORVU.MOREX.r2.2HG0125120,HORVU.MOREX.r2.7HG0598540,HORVU.MOREX.r2.3HG0197780,HORVU.MOREX.r2.2HG0180540,HORVU.MOREX.r2.5HG0416670,HORVU.MOREX.r2.4HG0277580,HORVU.MOREX.r2.2HG0159290,HORVU.MOREX.r2.6HG0490880,HORVU.MOREX.r2.7HG0552850,HORVU.MOREX.r2.1HG0020750,HORVU.MOREX.r2.4HG0325570,HORVU.MOREX.r2.4HG0317200,HORVU.MOREX.r2.6HG0511470,HORVU.MOREX.r2.2HG0106020,HORVU.MOREX.r2.4HG0281160,HORVU.MOR…	4.59896e-06	0.289968	3.29592e-05
25	77	213	10	6	HORVU.MOREX.r2.2HG0180770,HORVU.MOREX.r2.4HG0342100,HORVU.MOREX.r2.2HG0178910,HORVU.MOREX.r2.2HG0176000,HORVU.MOREX.r2.2HG0175600,HORVU.MOREX.r2.2HG0178800,HORVU.MOREX.r2.2HG0176780,HORVU.MOREX.r2.4HG0342170,HORVU.MOREX.r2.2HG0179230,HORVU.MOREX.r2.2HG0181050	HORVU.MOREX.r2.4HG0342320,HORVU.MOREX.r2.4HG0342150,HORVU.MOREX.r2.6HG0505700,HORVU.MOREX.r2.5HG0435600,HORVU.MOREX.r2.5HG0367380,HORVU.MOREX.r2.1HG0035900	HORVU.MOREX.r2.1HG0066220,HORVU.MOREX.r2.UnG0629360,HORVU.MOREX.r2.1HG0024040,HORVU.MOREX.r2.3HG0205270,HORVU.MOREX.r2.4HG0333360,HORVU.MOREX.r2.UnG0631120,HORVU.MOREX.r2.6HG0522390,HORVU.MOREX.r2.1HG0007260,HORVU.MOREX.r2.3HG0196390,HORVU.MOREX.r2.7HG0540790,HORVU.MOREX.r2.6HG0484190,HORVU.MOREX.r2.7HG0536830,HORVU.MOREX.r2.2HG0180620,HORVU.MOREX.r2.5HG0377040,HORVU.MOREX.r2.1HG0042190,HORVU.MOR…	6.61336e-06	0.204685	4.54999e-05
26	119	151	49	14	HORVU.MOREX.r2.5HG0384030,HORVU.MOREX.r2.2HG0167860,HORVU.MOREX.r2.7HG0612990,HORVU.MOREX.r2.5HG0384050,HORVU.MOREX.r2.3HG0184030,HORVU.MOREX.r2.5HG0376150,HORVU.MOREX.r2.5HG0374410,HORVU.MOREX.r2.7HG0541620,HORVU.MOREX.r2.5HG0366280,HORVU.MOREX.r2.2HG0178800,HORVU.MOREX.r2.5HG0375540,HORVU.MOREX.r2.2HG0179230,HORVU.MOREX.r2.5HG0381870,HORVU.MOREX.r2.7HG0612840,HORVU.MOREX.r2.5HG0381090,HORVU.MOR…	HORVU.MOREX.r2.5HG0379030,HORVU.MOREX.r2.3HG0257390,HORVU.MOREX.r2.2HG0167690,HORVU.MOREX.r2.3HG0184480,HORVU.MOREX.r2.6HG0476630,HORVU.MOREX.r2.7HG0612910,HORVU.MOREX.r2.7HG0599290,HORVU.MOREX.r2.5HG0382400,HORVU.MOREX.r2.7HG0541240,HORVU.MOREX.r2.2HG0123640,HORVU.MOREX.r2.5HG0378450,HORVU.MOREX.r2.7HG0527010,HORVU.MOREX.r2.2HG0167650,HORVU.MOREX.r2.2HG0096390	HORVU.MOREX.r2.2HG0105540,HORVU.MOREX.r2.4HG0296940,HORVU.MOREX.r2.5HG0390920,HORVU.MOREX.r2.7HG0578220,HORVU.MOREX.r2.2HG0177900,HORVU.MOREX.r2.3HG0252970,HORVU.MOREX.r2.6HG0516350,HORVU.MOREX.r2.2HG0138210,HORVU.MOREX.r2.3HG0203270,HORVU.MOREX.r2.2HG0163370,HORVU.MOREX.r2.3HG0221170,HORVU.MOREX.r2.1HG0071810,HORVU.MOREX.r2.6HG0488890,HORVU.MOREX.r2.4HG0331900,HORVU.MOREX.r2.7HG0542540,HORVU.MOR…	9.24489e-06	0.322178	6.11585e-05
27	74	347	11	6	HORVU.MOREX.r2.2HG0180770,HORVU.MOREX.r2.6HG0502370,HORVU.MOREX.r2.6HG0502880,HORVU.MOREX.r2.2HG0178910,HORVU.MOREX.r2.6HG0503330,HORVU.MOREX.r2.2HG0176000,HORVU.MOREX.r2.2HG0175600,HORVU.MOREX.r2.2HG0178800,HORVU.MOREX.r2.2HG0176780,HORVU.MOREX.r2.2HG0179230,HORVU.MOREX.r2.2HG0181050	HORVU.MOREX.r2.6HG0469440,HORVU.MOREX.r2.6HG0526270,HORVU.MOREX.r2.1HG0023130,HORVU.MOREX.r2.5HG0393640,HORVU.MOREX.r2.6HG0522850,HORVU.MOREX.r2.3HG0210880	HORVU.MOREX.r2.5HG0360110,HORVU.MOREX.r2.5HG0360530,HORVU.MOREX.r2.7HG0609910,HORVU.MOREX.r2.2HG0176090,HORVU.MOREX.r2.2HG0130220,HORVU.MOREX.r2.3HG0238900,HORVU.MOREX.r2.3HG0214550,HORVU.MOREX.r2.3HG0269620,HORVU.MOREX.r2.5HG0354170,HORVU.MOREX.r2.5HG0432000,HORVU.MOREX.r2.4HG0287800,HORVU.MOREX.r2.6HG0526270,HORVU.MOREX.r2.5HG0422820,HORVU.MOREX.r2.1HG0023130,HORVU.MOREX.r2.4HG0348600,HORVU.MOR…	1.49815e-05	0.21382	9.54378e-05
28	55	111	11	3	HORVU.MOREX.r2.2HG0085130,HORVU.MOREX.r2.2HG0085320,HORVU.MOREX.r2.2HG0085770,HORVU.MOREX.r2.2HG0085930,HORVU.MOREX.r2.2HG0178910,HORVU.MOREX.r2.2HG0084620,HORVU.MOREX.r2.2HG0085190,HORVU.MOREX.r2.2HG0178800,HORVU.MOREX.r2.2HG0085110,HORVU.MOREX.r2.2HG0085830,HORVU.MOREX.r2.2HG0179230	HORVU.MOREX.r2.2HG0113860,HORVU.MOREX.r2.7HG0562570,HORVU.MOREX.r2.2HG0086460	HORVU.MOREX.r2.4HG0303620,HORVU.MOREX.r2.6HG0525270,HORVU.MOREX.r2.4HG0287500,HORVU.MOREX.r2.5HG0356540,HORVU.MOREX.r2.3HG0262430,HORVU.MOREX.r2.6HG0500170,HORVU.MOREX.r2.2HG0104130,HORVU.MOREX.r2.6HG0500390,HORVU.MOREX.r2.5HG0354170,HORVU.MOREX.r2.3HG0251820,HORVU.MOREX.r2.6HG0506770,HORVU.MOREX.r2.5HG0423860,HORVU.MOREX.r2.3HG0262440,HORVU.MOREX.r2.7HG0562570,HORVU.MOREX.r2.2HG0107650,HORVU.MOR…	1.85647e-05	0.140003	0.00011404
29	68	494	16	5	HORVU.MOREX.r2.2HG0180770,HORVU.MOREX.r2.5HG0424830,HORVU.MOREX.r2.5HG0425570,HORVU.MOREX.r2.5HG0424740,HORVU.MOREX.r2.5HG0423680,HORVU.MOREX.r2.5HG0424570,HORVU.MOREX.r2.2HG0178910,HORVU.MOREX.r2.5HG0424020,HORVU.MOREX.r2.5HG0424260,HORVU.MOREX.r2.5HG0424820,HORVU.MOREX.r2.2HG0178800,HORVU.MOREX.r2.5HG0424900,HORVU.MOREX.r2.5HG0423510,HORVU.MOREX.r2.2HG0179230,HORVU.MOREX.r2.2HG0181050,HORVU.MOR…	HORVU.MOREX.r2.5HG0429690,HORVU.MOREX.r2.6HG0511230,HORVU.MOREX.r2.5HG0413480,HORVU.MOREX.r2.6HG0521660,HORVU.MOREX.r2.5HG0424650	HORVU.MOREX.r2.7HG0567840,HORVU.MOREX.r2.6HG0500350,HORVU.MOREX.r2.7HG0541840,HORVU.MOREX.r2.5HG0424690,HORVU.MOREX.r2.4HG0346770,HORVU.MOREX.r2.1HG0013150,HORVU.MOREX.r2.2HG0136260,HORVU.MOREX.r2.5HG0349480,HORVU.MOREX.r2.2HG0132010,HORVU.MOREX.r2.4HG0312260,HORVU.MOREX.r2.7HG0587930,HORVU.MOREX.r2.5HG0424650,HORVU.MOREX.r2.2HG0129220,HORVU.MOREX.r2.5HG0413480,HORVU.MOREX.r2.4HG0338120,HORVU.MOR…	1.99184e-05	0.192405	0.000118137
30	49	68	5	2	HORVU.MOREX.r2.2HG0098650,HORVU.MOREX.r2.2HG0098990,HORVU.MOREX.r2.2HG0178910,HORVU.MOREX.r2.2HG0178800,HORVU.MOREX.r2.2HG0179230	HORVU.MOREX.r2.3HG0241990,HORVU.MOREX.r2.2HG0098980	HORVU.MOREX.r2.3HG0209960,HORVU.MOREX.r2.7HG0601520,HORVU.MOREX.r2.3HG0241990,HORVU.MOREX.r2.5HG0354240,HORVU.MOREX.r2.6HG0514290,HORVU.MOREX.r2.6HG0494900,HORVU.MOREX.r2.3HG0266510,HORVU.MOREX.r2.5HG0427930,HORVU.MOREX.r2.4HG0286590,HORVU.MOREX.r2.3HG0263610,HORVU.MOREX.r2.2HG0131310,HORVU.MOREX.r2.4HG0336500,HORVU.MOREX.r2.3HG0266870,HORVU.MOREX.r2.3HG0186750,HORVU.MOREX.r2.7HG0561080,HORVU.MOR…	2.06314e-05	0.103308	0.000118287
31	46	187	5	2	HORVU.MOREX.r2.2HG0180770,HORVU.MOREX.r2.2HG0178910,HORVU.MOREX.r2.2HG0178800,HORVU.MOREX.r2.2HG0181050,HORVU.MOREX.r2.2HG0179230	HORVU.MOREX.r2.6HG0479020,HORVU.MOREX.r2.7HG0547680	HORVU.MOREX.r2.6HG0490030,HORVU.MOREX.r2.2HG0093150,HORVU.MOREX.r2.4HG0311830,HORVU.MOREX.r2.5HG0445840,HORVU.MOREX.r2.1HG0068470,HORVU.MOREX.r2.7HG0611120,HORVU.MOREX.r2.4HG0324060,HORVU.MOREX.r2.5HG0411090,HORVU.MOREX.r2.5HG0387000,HORVU.MOREX.r2.4HG0347280,HORVU.MOREX.r2.6HG0479020,HORVU.MOREX.r2.6HG0516580,HORVU.MOREX.r2.4HG0333640,HORVU.MOREX.r2.4HG0312850,HORVU.MOREX.r2.5HG0407060,HORVU.MOR…	5.14223e-05	0.110405	0.000285311
32	110	286	21	14	HORVU.MOREX.r2.2HG0180770,HORVU.MOREX.r2.3HG0182940,HORVU.MOREX.r2.3HG0183050,HORVU.MOREX.r2.6HG0448760,HORVU.MOREX.r2.6HG0448800,HORVU.MOREX.r2.4HG0345920,HORVU.MOREX.r2.1HG0056240,HORVU.MOREX.r2.2HG0178910,HORVU.MOREX.r2.1HG0051280,HORVU.MOREX.r2.6HG0448750,HORVU.MOREX.r2.4HG0344720,HORVU.MOREX.r2.1HG0051240,HORVU.MOREX.r2.2HG0146390,HORVU.MOREX.r2.2HG0178800,HORVU.MOREX.r2.1HG0051390,HORVU.MOR…	HORVU.MOREX.r2.4HG0341380,HORVU.MOREX.r2.4HG0344580,HORVU.MOREX.r2.2HG0084470,HORVU.MOREX.r2.1HG0051000,HORVU.MOREX.r2.3HG0181650,HORVU.MOREX.r2.3HG0223560,HORVU.MOREX.r2.1HG0056280,HORVU.MOREX.r2.7HG0544780,HORVU.MOREX.r2.1HG0054550,HORVU.MOREX.r2.2HG0146380,HORVU.MOREX.r2.6HG0497270,HORVU.MOREX.r2.1HG0051750,HORVU.MOREX.r2.1HG0056300,HORVU.MOREX.r2.1HG0053910	HORVU.MOREX.r2.1HG0045520,HORVU.MOREX.r2.1HG0054550,HORVU.MOREX.r2.4HG0308370,HORVU.MOREX.r2.3HG0194750,HORVU.MOREX.r2.6HG0471620,HORVU.MOREX.r2.4HG0284310,HORVU.MOREX.r2.5HG0404110,HORVU.MOREX.r2.4HG0331120,HORVU.MOREX.r2.4HG0333510,HORVU.MOREX.r2.1HG0015640,HORVU.MOREX.r2.4HG0286200,HORVU.MOREX.r2.1HG0045400,HORVU.MOREX.r2.7HG0623510,HORVU.MOREX.r2.5HG0363660,HORVU.MOREX.r2.3HG0241060,HORVU.MOR…	7.44454e-05	0.352901	0.000400144
33	79	525	7	8	HORVU.MOREX.r2.5HG0392190,HORVU.MOREX.r2.2HG0180770,HORVU.MOREX.r2.2HG0178910,HORVU.MOREX.r2.2HG0114200,HORVU.MOREX.r2.2HG0179230,HORVU.MOREX.r2.2HG0181050,HORVU.MOREX.r2.2HG0178800	HORVU.MOREX.r2.5HG0381700,HORVU.MOREX.r2.4HG0309240,HORVU.MOREX.r2.2HG0114700,HORVU.MOREX.r2.3HG0236190,HORVU.MOREX.r2.3HG0239480,HORVU.MOREX.r2.5HG0355840,HORVU.MOREX.r2.3HG0202450,HORVU.MOREX.r2.5HG0356470	HORVU.MOREX.r2.6HG0490110,HORVU.MOREX.r2.2HG0114700,HORVU.MOREX.r2.6HG0515310,HORVU.MOREX.r2.3HG0222020,HORVU.MOREX.r2.1HG0071380,HORVU.MOREX.r2.3HG0239480,HORVU.MOREX.r2.5HG0409330,HORVU.MOREX.r2.3HG0230120,HORVU.MOREX.r2.5HG0356470,HORVU.MOREX.r2.6HG0490150,HORVU.MOREX.r2.UnG0625370,HORVU.MOREX.r2.5HG0382410,HORVU.MOREX.r2.5HG0381700,HORVU.MOREX.r2.4HG0309240,HORVU.MOREX.r2.5HG0356210,HORVU.MOR…	8.50756e-05	0.273129	0.000443424
34	62	24	9	5	HORVU.MOREX.r2.6HG0460020,HORVU.MOREX.r2.7HG0532170,HORVU.MOREX.r2.2HG0178910,HORVU.MOREX.r2.7HG0532790,HORVU.MOREX.r2.5HG0424410,HORVU.MOREX.r2.7HG0531920,HORVU.MOREX.r2.2HG0178800,HORVU.MOREX.r2.2HG0082340,HORVU.MOREX.r2.2HG0179230	HORVU.MOREX.r2.6HG0460140,HORVU.MOREX.r2.2HG0082400,HORVU.MOREX.r2.7HG0617930,HORVU.MOREX.r2.7HG0531890,HORVU.MOREX.r2.6HG0494050	HORVU.MOREX.r2.4HG0341200,HORVU.MOREX.r2.5HG0354630,HORVU.MOREX.r2.5HG0408360,HORVU.MOREX.r2.3HG0275680,HORVU.MOREX.r2.2HG0082400,HORVU.MOREX.r2.3HG0265580,HORVU.MOREX.r2.2HG0172230,HORVU.MOREX.r2.2HG0121430,HORVU.MOREX.r2.1HG0073890,HORVU.MOREX.r2.2HG0081610,HORVU.MOREX.r2.7HG0600040,HORVU.MOREX.r2.7HG0577820,HORVU.MOREX.r2.3HG0260940,HORVU.MOREX.r2.6HG0475510,HORVU.MOREX.r2.1HG0019270,HORVU.MOR…	0.000104224	0.212865	0.000527249
35	53	167	9	4	HORVU.MOREX.r2.6HG0459120,HORVU.MOREX.r2.6HG0459110,HORVU.MOREX.r2.2HG0178910,HORVU.MOREX.r2.2HG0091410,HORVU.MOREX.r2.7HG0600720,HORVU.MOREX.r2.2HG0091560,HORVU.MOREX.r2.2HG0178800,HORVU.MOREX.r2.2HG0179230,HORVU.MOREX.r2.7HG0600330	HORVU.MOREX.r2.7HG0598220,HORVU.MOREX.r2.3HG0237800,HORVU.MOREX.r2.6HG0459010,HORVU.MOREX.r2.2HG0091430	HORVU.MOREX.r2.1HG0067230,HORVU.MOREX.r2.3HG0259450,HORVU.MOREX.r2.4HG0293380,HORVU.MOREX.r2.3HG0251960,HORVU.MOREX.r2.6HG0483290,HORVU.MOREX.r2.6HG0459010,HORVU.MOREX.r2.7HG0598220,HORVU.MOREX.r2.3HG0226880,HORVU.MOREX.r2.3HG0192010,HORVU.MOREX.r2.1HG0041000,HORVU.MOREX.r2.4HG0320350,HORVU.MOREX.r2.6HG0522630,HORVU.MOREX.r2.6HG0517480,HORVU.MOREX.r2.2HG0176030,HORVU.MOREX.r2.2HG0088280,HORVU.MOR…	0.000200534	0.198274	0.000985482
36	62	206	52	6	HORVU.MOREX.r2.5HG0384030,HORVU.MOREX.r2.3HG0269970,HORVU.MOREX.r2.3HG0270250,HORVU.MOREX.r2.5HG0384050,HORVU.MOREX.r2.2HG0136750,HORVU.MOREX.r2.5HG0374410,HORVU.MOREX.r2.5HG0366280,HORVU.MOREX.r2.2HG0178800,HORVU.MOREX.r2.5HG0375540,HORVU.MOREX.r2.2HG0179230,HORVU.MOREX.r2.2HG0175600,HORVU.MOREX.r2.5HG0381870,HORVU.MOREX.r2.5HG0381090,HORVU.MOREX.r2.5HG0382660,HORVU.MOREX.r2.5HG0384070,HORVU.MOR…	HORVU.MOREX.r2.5HG0373020,HORVU.MOREX.r2.7HG0535850,HORVU.MOREX.r2.3HG0272190,HORVU.MOREX.r2.4HG0343110,HORVU.MOREX.r2.1HG0036770,HORVU.MOREX.r2.2HG0134390	HORVU.MOREX.r2.4HG0316350,HORVU.MOREX.r2.7HG0535850,HORVU.MOREX.r2.5HG0372070,HORVU.MOREX.r2.4HG0296940,HORVU.MOREX.r2.6HG0462220,HORVU.MOREX.r2.2HG0141580,HORVU.MOREX.r2.2HG0103930,HORVU.MOREX.r2.3HG0249950,HORVU.MOREX.r2.2HG0175160,HORVU.MOREX.r2.2HG0119510,HORVU.MOREX.r2.6HG0524490,HORVU.MOREX.r2.4HG0343110,HORVU.MOREX.r2.UnG0625080,HORVU.MOREX.r2.2HG0113270,HORVU.MOREX.r2.3HG0272190,HORVU.MOR…	0.000360716	0.260144	0.00172342
37	67	97	13	7	HORVU.MOREX.r2.7HG0603640,HORVU.MOREX.r2.7HG0604200,HORVU.MOREX.r2.2HG0178910,HORVU.MOREX.r2.1HG0051280,HORVU.MOREX.r2.2HG0176000,HORVU.MOREX.r2.1HG0051240,HORVU.MOREX.r2.2HG0176780,HORVU.MOREX.r2.2HG0175600,HORVU.MOREX.r2.2HG0178800,HORVU.MOREX.r2.1HG0051390,HORVU.MOREX.r2.7HG0603900,HORVU.MOREX.r2.1HG0051370,HORVU.MOREX.r2.2HG0179230	HORVU.MOREX.r2.1HG0051000,HORVU.MOREX.r2.4HG0306970,HORVU.MOREX.r2.6HG0507270,HORVU.MOREX.r2.7HG0604010,HORVU.MOREX.r2.2HG0126160,HORVU.MOREX.r2.4HG0304230,HORVU.MOREX.r2.3HG0252710	HORVU.MOREX.r2.6HG0521040,HORVU.MOREX.r2.6HG0521380,HORVU.MOREX.r2.3HG0250080,HORVU.MOREX.r2.5HG0400420,HORVU.MOREX.r2.4HG0306970,HORVU.MOREX.r2.3HG0213550,HORVU.MOREX.r2.1HG0057810,HORVU.MOREX.r2.3HG0212880,HORVU.MOREX.r2.1HG0019520,HORVU.MOREX.r2.7HG0604010,HORVU.MOREX.r2.1HG0064910,HORVU.MOREX.r2.3HG0260450,HORVU.MOREX.r2.3HG0227930,HORVU.MOREX.r2.4HG0330390,HORVU.MOREX.r2.4HG0291600,HORVU.MOR…	0.000370749	0.283196	0.00172348
38	45	84	20	3	HORVU.MOREX.r2.2HG0180770,HORVU.MOREX.r2.5HG0434780,HORVU.MOREX.r2.5HG0434130,HORVU.MOREX.r2.5HG0434680,HORVU.MOREX.r2.5HG0433720,HORVU.MOREX.r2.5HG0434270,HORVU.MOREX.r2.5HG0434470,HORVU.MOREX.r2.2HG0178910,HORVU.MOREX.r2.5HG0434820,HORVU.MOREX.r2.5HG0434250,HORVU.MOREX.r2.5HG0435040,HORVU.MOREX.r2.2HG0178800,HORVU.MOREX.r2.5HG0434100,HORVU.MOREX.r2.5HG0434970,HORVU.MOREX.r2.5HG0434260,HORVU.MOR…	HORVU.MOREX.r2.5HG0399280,HORVU.MOREX.r2.7HG0595470,HORVU.MOREX.r2.5HG0438750	HORVU.MOREX.r2.5HG0410500,HORVU.MOREX.r2.4HG0331180,HORVU.MOREX.r2.5HG0387770,HORVU.MOREX.r2.2HG0090390,HORVU.MOREX.r2.2HG0142820,HORVU.MOREX.r2.6HG0512320,HORVU.MOREX.r2.5HG0376600,HORVU.MOREX.r2.3HG0191400,HORVU.MOREX.r2.5HG0438750,HORVU.MOREX.r2.5HG0399280,HORVU.MOREX.r2.4HG0317400,HORVU.MOREX.r2.5HG0396860,HORVU.MOREX.r2.4HG0286300,HORVU.MOREX.r2.1HG0045480,HORVU.MOREX.r2.5HG0423520,HORVU.MOR…	0.000394978	0.173618	0.0017878
39	97	211	28	13	HORVU.MOREX.r2.5HG0398040,HORVU.MOREX.r2.5HG0397220,HORVU.MOREX.r2.5HG0398060,HORVU.MOREX.r2.5HG0404560,HORVU.MOREX.r2.2HG0178800,HORVU.MOREX.r2.2HG0179230,HORVU.MOREX.r2.5HG0396840,HORVU.MOREX.r2.2HG0178910,HORVU.MOREX.r2.5HG0396550,HORVU.MOREX.r2.3HG0241420,HORVU.MOREX.r2.3HG0241540,HORVU.MOREX.r2.1HG0003500,HORVU.MOREX.r2.5HG0394700,HORVU.MOREX.r2.2HG0176780,HORVU.MOREX.r2.5HG0396910,HORVU.MOR…	HORVU.MOREX.r2.3HG0241740,HORVU.MOREX.r2.1HG0002460,HORVU.MOREX.r2.1HG0002750,HORVU.MOREX.r2.3HG0241790,HORVU.MOREX.r2.5HG0394510,HORVU.MOREX.r2.7HG0575160,HORVU.MOREX.r2.3HG0239630,HORVU.MOREX.r2.1HG0003340,HORVU.MOREX.r2.5HG0404460,HORVU.MOREX.r2.5HG0404430,HORVU.MOREX.r2.1HG0003010,HORVU.MOREX.r2.5HG0404510,HORVU.MOREX.r2.3HG0241030	HORVU.MOREX.r2.1HG0040480,HORVU.MOREX.r2.3HG0238270,HORVU.MOREX.r2.3HG0252790,HORVU.MOREX.r2.4HG0293380,HORVU.MOREX.r2.7HG0622110,HORVU.MOREX.r2.3HG0204940,HORVU.MOREX.r2.3HG0251960,HORVU.MOREX.r2.1HG0059750,HORVU.MOREX.r2.1HG0070820,HORVU.MOREX.r2.1HG0028340,HORVU.MOREX.r2.6HG0519490,HORVU.MOREX.r2.7HG0591810,HORVU.MOREX.r2.3HG0261040,HORVU.MOREX.r2.1HG0003010,HORVU.MOREX.r2.5HG0431220,HORVU.MOR…	0.000421025	0.375092	0.00185683
40	92	173	18	12	HORVU.MOREX.r2.2HG0180770,HORVU.MOREX.r2.7HG0553840,HORVU.MOREX.r2.6HG0464080,HORVU.MOREX.r2.2HG0095700,HORVU.MOREX.r2.7HG0551080,HORVU.MOREX.r2.2HG0178910,HORVU.MOREX.r2.7HG0554850,HORVU.MOREX.r2.2HG0176000,HORVU.MOREX.r2.2HG0096030,HORVU.MOREX.r2.2HG0175600,HORVU.MOREX.r2.2HG0178800,HORVU.MOREX.r2.7HG0553740,HORVU.MOREX.r2.7HG0552160,HORVU.MOREX.r2.2HG0176780,HORVU.MOREX.r2.7HG0554060,HORVU.MOR…	HORVU.MOREX.r2.1HG0023550,HORVU.MOREX.r2.6HG0461780,HORVU.MOREX.r2.5HG0445890,HORVU.MOREX.r2.6HG0461110,HORVU.MOREX.r2.2HG0177520,HORVU.MOREX.r2.2HG0095980,HORVU.MOREX.r2.1HG0036770,HORVU.MOREX.r2.7HG0554110,HORVU.MOREX.r2.5HG0404180,HORVU.MOREX.r2.4HG0296290,HORVU.MOREX.r2.4HG0344500,HORVU.MOREX.r2.2HG0096010	HORVU.MOREX.r2.2HG0121020,HORVU.MOREX.r2.5HG0374940,HORVU.MOREX.r2.1HG0030950,HORVU.MOREX.r2.1HG0036770,HORVU.MOREX.r2.5HG0387820,HORVU.MOREX.r2.6HG0462430,HORVU.MOREX.r2.1HG0044700,HORVU.MOREX.r2.7HG0554110,HORVU.MOREX.r2.4HG0325400,HORVU.MOREX.r2.4HG0282090,HORVU.MOREX.r2.5HG0401870,HORVU.MOREX.r2.1HG0018510,HORVU.MOREX.r2.2HG0086340,HORVU.MOREX.r2.4HG0318980,HORVU.MOREX.r2.7HG0558950,HORVU.MOR…	0.000454387	0.363644	0.00195386
41	38	61	4	2	HORVU.MOREX.r2.5HG0398400,HORVU.MOREX.r2.5HG0398680,HORVU.MOREX.r2.5HG0398100,HORVU.MOREX.r2.1HG0000450	HORVU.MOREX.r2.5HG0370810,HORVU.MOREX.r2.5HG0399610	HORVU.MOREX.r2.7HG0617580,HORVU.MOREX.r2.6HG0523580,HORVU.MOREX.r2.5HG0399590,HORVU.MOREX.r2.5HG0399610,HORVU.MOREX.r2.5HG0370810,HORVU.MOREX.r2.2HG0138120,HORVU.MOREX.r2.2HG0097620,HORVU.MOREX.r2.5HG0399570,HORVU.MOREX.r2.7HG0612430,HORVU.MOREX.r2.1HG0032950,HORVU.MOREX.r2.7HG0563000,HORVU.MOREX.r2.5HG0399500,HORVU.MOREX.r2.1HG0033010,HORVU.MOREX.r2.6HG0493980,HORVU.MOREX.r2.2HG0111940,HORVU.MOR…	0.000474706	0.135114	0.00199145
42	42	180	16	23	HORVU.MOREX.r2.7HG0591940,HORVU.MOREX.r2.7HG0588640,HORVU.MOREX.r2.7HG0598640,HORVU.MOREX.r2.7HG0589750,HORVU.MOREX.r2.2HG0178910,HORVU.MOREX.r2.7HG0591410,HORVU.MOREX.r2.2HG0179230,HORVU.MOREX.r2.7HG0591540,HORVU.MOREX.r2.7HG0598410,HORVU.MOREX.r2.7HG0592120,HORVU.MOREX.r2.7HG0590460,HORVU.MOREX.r2.7HG0585580,HORVU.MOREX.r2.7HG0598750,HORVU.MOREX.r2.7HG0590580,HORVU.MOREX.r2.7HG0591580,HORVU.MOR…	HORVU.MOREX.r2.4HG0342850,HORVU.MOREX.r2.7HG0590660,HORVU.MOREX.r2.3HG0207620,HORVU.MOREX.r2.7HG0591440,HORVU.MOREX.r2.3HG0244820,HORVU.MOREX.r2.7HG0589680,HORVU.MOREX.r2.7HG0593190,HORVU.MOREX.r2.7HG0569130,HORVU.MOREX.r2.7HG0590840,HORVU.MOREX.r2.7HG0597670,HORVU.MOREX.r2.7HG0566770,HORVU.MOREX.r2.1HG0070170,HORVU.MOREX.r2.7HG0589040,HORVU.MOREX.r2.2HG0167090,HORVU.MOREX.r2.4HG0276380,HORVU.MOR…	HORVU.MOREX.r2.3HG0255590,HORVU.MOREX.r2.4HG0342850,HORVU.MOREX.r2.7HG0590660,HORVU.MOREX.r2.6HG0524490,HORVU.MOREX.r2.3HG0207620,HORVU.MOREX.r2.7HG0591440,HORVU.MOREX.r2.3HG0244820,HORVU.MOREX.r2.7HG0589680,HORVU.MOREX.r2.7HG0593190,HORVU.MOREX.r2.7HG0569130,HORVU.MOREX.r2.7HG0590840,HORVU.MOREX.r2.4HG0343470,HORVU.MOREX.r2.4HG0286370,HORVU.MOREX.r2.7HG0566770,HORVU.MOREX.r2.1HG0070170,HORVU.MOR…	0.000499931	2.9767	0.00201647
43	55	372	8	5	HORVU.MOREX.r2.3HG0186250,HORVU.MOREX.r2.4HG0342570,HORVU.MOREX.r2.1HG0074000,HORVU.MOREX.r2.4HG0337620,HORVU.MOREX.r2.4HG0343120,HORVU.MOREX.r2.1HG0074020,HORVU.MOREX.r2.3HG0185980,HORVU.MOREX.r2.4HG0337730	HORVU.MOREX.r2.1HG0073380,HORVU.MOREX.r2.4HG0336580,HORVU.MOREX.r2.4HG0343110,HORVU.MOREX.r2.4HG0337420,HORVU.MOREX.r2.3HG0185430	HORVU.MOREX.r2.6HG0503700,HORVU.MOREX.r2.4HG0336580,HORVU.MOREX.r2.7HG0539640,HORVU.MOREX.r2.1HG0031900,HORVU.MOREX.r2.5HG0406360,HORVU.MOREX.r2.4HG0308470,HORVU.MOREX.r2.3HG0265360,HORVU.MOREX.r2.2HG0132970,HORVU.MOREX.r2.7HG0536440,HORVU.MOREX.r2.4HG0343110,HORVU.MOREX.r2.5HG0399730,HORVU.MOREX.r2.6HG0516470,HORVU.MOREX.r2.6HG0456190,HORVU.MOREX.r2.4HG0283930,HORVU.MOREX.r2.5HG0426690,HORVU.MOR…	0.000504116	0.242941	0.00201647
44	85	177	25	11	HORVU.MOREX.r2.5HG0424830,HORVU.MOREX.r2.5HG0425570,HORVU.MOREX.r2.5HG0423680,HORVU.MOREX.r2.3HG0274770,HORVU.MOREX.r2.5HG0424260,HORVU.MOREX.r2.2HG0178800,HORVU.MOREX.r2.5HG0423510,HORVU.MOREX.r2.2HG0179230,HORVU.MOREX.r2.5HG0424740,HORVU.MOREX.r2.2HG0178910,HORVU.MOREX.r2.7HG0623230,HORVU.MOREX.r2.2HG0176780,HORVU.MOREX.r2.5HG0425200,HORVU.MOREX.r2.5HG0424820,HORVU.MOREX.r2.5HG0424570,HORVU.MOR…	HORVU.MOREX.r2.4HG0340370,HORVU.MOREX.r2.7HG0556350,HORVU.MOREX.r2.2HG0107740,HORVU.MOREX.r2.2HG0098980,HORVU.MOREX.r2.7HG0595210,HORVU.MOREX.r2.3HG0274880,HORVU.MOREX.r2.2HG0102260,HORVU.MOREX.r2.5HG0424790,HORVU.MOREX.r2.7HG0623210,HORVU.MOREX.r2.6HG0522010,HORVU.MOREX.r2.5HG0419570	HORVU.MOREX.r2.4HG0282950,HORVU.MOREX.r2.3HG0207310,HORVU.MOREX.r2.4HG0340370,HORVU.MOREX.r2.5HG0355510,HORVU.MOREX.r2.1HG0045540,HORVU.MOREX.r2.1HG0004870,HORVU.MOREX.r2.3HG0270140,HORVU.MOREX.r2.2HG0102260,HORVU.MOREX.r2.6HG0458630,HORVU.MOREX.r2.2HG0096630,HORVU.MOREX.r2.6HG0515070,HORVU.MOREX.r2.2HG0100310,HORVU.MOREX.r2.7HG0623210,HORVU.MOREX.r2.4HG0343070,HORVU.MOREX.r2.4HG0277590,HORVU.MOR…	0.00067167	0.360577	0.00262562
45	26	46	4	16	HORVU.MOREX.r2.7HG0550400,HORVU.MOREX.r2.7HG0550010,HORVU.MOREX.r2.1HG0078740,HORVU.MOREX.r2.5HG0390630	HORVU.MOREX.r2.5HG0392160,HORVU.MOREX.r2.5HG0390610,HORVU.MOREX.r2.5HG0393320,HORVU.MOREX.r2.7HG0550830,HORVU.MOREX.r2.6HG0481300,HORVU.MOREX.r2.5HG0373560,HORVU.MOREX.r2.3HG0246340,HORVU.MOREX.r2.5HG0392170,HORVU.MOREX.r2.5HG0439210,HORVU.MOREX.r2.6HG0461880,HORVU.MOREX.r2.5HG0390620,HORVU.MOREX.r2.5HG0369400,HORVU.MOREX.r2.5HG0390480,HORVU.MOREX.r2.3HG0265650,HORVU.MOREX.r2.5HG0367920,HORVU.MOR…	HORVU.MOREX.r2.5HG0390610,HORVU.MOREX.r2.6HG0481300,HORVU.MOREX.r2.5HG0393320,HORVU.MOREX.r2.7HG0550830,HORVU.MOREX.r2.5HG0434650,HORVU.MOREX.r2.3HG0243530,HORVU.MOREX.r2.2HG0085790,HORVU.MOREX.r2.5HG0373560,HORVU.MOREX.r2.3HG0246340,HORVU.MOREX.r2.5HG0439210,HORVU.MOREX.r2.5HG0392160,HORVU.MOREX.r2.6HG0461880,HORVU.MOREX.r2.5HG0390620,HORVU.MOREX.r2.7HG0561690,HORVU.MOREX.r2.5HG0392170,HORVU.MOR…	0.000691694	3.92923	0.00264381
46	80	190	12	10	HORVU.MOREX.r2.2HG0180770,HORVU.MOREX.r2.2HG0171780,HORVU.MOREX.r2.2HG0172070,HORVU.MOREX.r2.2HG0178910,HORVU.MOREX.r2.2HG0176000,HORVU.MOREX.r2.2HG0172410,HORVU.MOREX.r2.2HG0171620,HORVU.MOREX.r2.2HG0175600,HORVU.MOREX.r2.2HG0178800,HORVU.MOREX.r2.2HG0176780,HORVU.MOREX.r2.2HG0179230,HORVU.MOREX.r2.2HG0181050	HORVU.MOREX.r2.5HG0369800,HORVU.MOREX.r2.1HG0036700,HORVU.MOREX.r2.6HG0509770,HORVU.MOREX.r2.4HG0291420,HORVU.MOREX.r2.6HG0455470,HORVU.MOREX.r2.7HG0532700,HORVU.MOREX.r2.3HG0235390,HORVU.MOREX.r2.3HG0206640,HORVU.MOREX.r2.2HG0172390,HORVU.MOREX.r2.3HG0254300	HORVU.MOREX.r2.5HG0399490,HORVU.MOREX.r2.2HG0086230,HORVU.MOREX.r2.2HG0095530,HORVU.MOREX.r2.6HG0509770,HORVU.MOREX.r2.6HG0472970,HORVU.MOREX.r2.6HG0455470,HORVU.MOREX.r2.5HG0361560,HORVU.MOREX.r2.5HG0368460,HORVU.MOREX.r2.4HG0323950,HORVU.MOREX.r2.2HG0111680,HORVU.MOREX.r2.7HG0585290,HORVU.MOREX.r2.1HG0069590,HORVU.MOREX.r2.3HG0254300,HORVU.MOREX.r2.5HG0405880,HORVU.MOREX.r2.7HG0613260,HORVU.MOR…	0.000716249	0.346617	0.00267815
47	42	28	4	3	HORVU.MOREX.r2.2HG0180770,HORVU.MOREX.r2.7HG0549450,HORVU.MOREX.r2.2HG0181050,HORVU.MOREX.r2.1HG0078080	HORVU.MOREX.r2.1HG0021830,HORVU.MOREX.r2.7HG0549650,HORVU.MOREX.r2.5HG0435600	HORVU.MOREX.r2.6HG0463520,HORVU.MOREX.r2.7HG0579770,HORVU.MOREX.r2.7HG0558250,HORVU.MOREX.r2.4HG0316440,HORVU.MOREX.r2.5HG0420020,HORVU.MOREX.r2.7HG0553660,HORVU.MOREX.r2.1HG0008410,HORVU.MOREX.r2.7HG0547700,HORVU.MOREX.r2.3HG0254780,HORVU.MOREX.r2.6HG0499920,HORVU.MOREX.r2.1HG0056420,HORVU.MOREX.r2.5HG0430050,HORVU.MOREX.r2.6HG0516530,HORVU.MOREX.r2.2HG0079860,HORVU.MOREX.r2.5HG0425960,HORVU.MOR…	0.000926573	0.187064	0.00339086
48	84	279	15	11	HORVU.MOREX.r2.3HG0239810,HORVU.MOREX.r2.3HG0253360,HORVU.MOREX.r2.3HG0239860,HORVU.MOREX.r2.2HG0178910,HORVU.MOREX.r2.2HG0163570,HORVU.MOREX.r2.2HG0176000,HORVU.MOREX.r2.3HG0254010,HORVU.MOREX.r2.2HG0175600,HORVU.MOREX.r2.2HG0178800,HORVU.MOREX.r2.2HG0176780,HORVU.MOREX.r2.3HG0253440,HORVU.MOREX.r2.7HG0530220,HORVU.MOREX.r2.2HG0162870,HORVU.MOREX.r2.2HG0179230,HORVU.MOREX.r2.3HG0254040	HORVU.MOREX.r2.4HG0325660,HORVU.MOREX.r2.2HG0155270,HORVU.MOREX.r2.2HG0163480,HORVU.MOREX.r2.3HG0261030,HORVU.MOREX.r2.3HG0253370,HORVU.MOREX.r2.3HG0239380,HORVU.MOREX.r2.4HG0281140,HORVU.MOREX.r2.7HG0530900,HORVU.MOREX.r2.5HG0430010,HORVU.MOREX.r2.4HG0296290,HORVU.MOREX.r2.7HG0538650	HORVU.MOREX.r2.6HG0524250,HORVU.MOREX.r2.4HG0325660,HORVU.MOREX.r2.1HG0044450,HORVU.MOREX.r2.6HG0488430,HORVU.MOREX.r2.7HG0598990,HORVU.MOREX.r2.5HG0429640,HORVU.MOREX.r2.6HG0497960,HORVU.MOREX.r2.5HG0405670,HORVU.MOREX.r2.2HG0114130,HORVU.MOREX.r2.5HG0365170,HORVU.MOREX.r2.5HG0363550,HORVU.MOREX.r2.3HG0239380,HORVU.MOREX.r2.2HG0163480,HORVU.MOREX.r2.5HG0423580,HORVU.MOREX.r2.7HG0530900,HORVU.MOR…	0.000962651	0.365576	0.0034495
49	47	81	3	4	HORVU.MOREX.r2.2HG0180770,HORVU.MOREX.r2.2HG0079230,HORVU.MOREX.r2.2HG0181050	HORVU.MOREX.r2.2HG0079220,HORVU.MOREX.r2.3HG0214110,HORVU.MOREX.r2.2HG0078890,HORVU.MOREX.r2.4HG0332480	HORVU.MOREX.r2.3HG0255810,HORVU.MOREX.r2.2HG0079220,HORVU.MOREX.r2.6HG0459100,HORVU.MOREX.r2.2HG0118970,HORVU.MOREX.r2.4HG0332480,HORVU.MOREX.r2.6HG0496120,HORVU.MOREX.r2.3HG0196030,HORVU.MOREX.r2.1HG0020240,HORVU.MOREX.r2.4HG0332620,HORVU.MOREX.r2.3HG0197840,HORVU.MOREX.r2.1HG0017460,HORVU.MOREX.r2.3HG0226610,HORVU.MOREX.r2.6HG0510060,HORVU.MOREX.r2.7HG0562200,HORVU.MOREX.r2.6HG0474050,HORVU.MOR…	0.0010385	0.226159	0.00364535
50	62	109	30	7	HORVU.MOREX.r2.7HG0615630,HORVU.MOREX.r2.1HG0078620,HORVU.MOREX.r2.5HG0438470,HORVU.MOREX.r2.7HG0609970,HORVU.MOREX.r2.7HG0617000,HORVU.MOREX.r2.2HG0178800,HORVU.MOREX.r2.2HG0176000,HORVU.MOREX.r2.7HG0617100,HORVU.MOREX.r2.1HG0078740,HORVU.MOREX.r2.5HG0439100,HORVU.MOREX.r2.5HG0439140,HORVU.MOREX.r2.2HG0178910,HORVU.MOREX.r2.2HG0179230,HORVU.MOREX.r2.7HG0615910,HORVU.MOREX.r2.5HG0439240,HORVU.MOR…	HORVU.MOREX.r2.5HG0439020,HORVU.MOREX.r2.3HG0260790,HORVU.MOREX.r2.7HG0616250,HORVU.MOREX.r2.5HG0369400,HORVU.MOREX.r2.2HG0097170,HORVU.MOREX.r2.7HG0610200,HORVU.MOREX.r2.5HG0439490	HORVU.MOREX.r2.3HG0196050,HORVU.MOREX.r2.2HG0157350,HORVU.MOREX.r2.1HG0021520,HORVU.MOREX.r2.2HG0163370,HORVU.MOREX.r2.5HG0402280,HORVU.MOREX.r2.4HG0290240,HORVU.MOREX.r2.3HG0187230,HORVU.MOREX.r2.2HG0096630,HORVU.MOREX.r2.5HG0370990,HORVU.MOREX.r2.3HG0248820,HORVU.MOREX.r2.2HG0097170,HORVU.MOREX.r2.1HG0060990,HORVU.MOREX.r2.2HG0098360,HORVU.MOREX.r2.3HG0241810,HORVU.MOREX.r2.1HG0005300,HORVU.MOR…	0.00113432	0.309191	0.00390207
51	28	54	3	1	HORVU.MOREX.r2.2HG0178910,HORVU.MOREX.r2.2HG0178800,HORVU.MOREX.r2.2HG0179230	HORVU.MOREX.r2.1HG0014210	HORVU.MOREX.r2.5HG0357690,HORVU.MOREX.r2.1HG0021150,HORVU.MOREX.r2.1HG0014210,HORVU.MOREX.r2.3HG0242640,HORVU.MOREX.r2.5HG0427180,HORVU.MOREX.r2.3HG0206810,HORVU.MOREX.r2.6HG0475780,HORVU.MOREX.r2.2HG0124800,HORVU.MOREX.r2.7HG0581950,HORVU.MOREX.r2.6HG0472140,HORVU.MOREX.r2.2HG0080150,HORVU.MOREX.r2.6HG0469590,HORVU.MOREX.r2.3HG0231820,HORVU.MOREX.r2.3HG0232110,HORVU.MOREX.r2.1HG0031470,HORVU.MOR…	0.0013005	0.0901714	0.004386
52	40	248	5	3	HORVU.MOREX.r2.2HG0180770,HORVU.MOREX.r2.2HG0178910,HORVU.MOREX.r2.2HG0178800,HORVU.MOREX.r2.2HG0181050,HORVU.MOREX.r2.2HG0179230	HORVU.MOREX.r2.5HG0349330,HORVU.MOREX.r2.2HG0083720,HORVU.MOREX.r2.3HG0235390	HORVU.MOREX.r2.2HG0115500,HORVU.MOREX.r2.5HG0404270,HORVU.MOREX.r2.7HG0603690,HORVU.MOREX.r2.5HG0399300,HORVU.MOREX.r2.5HG0404230,HORVU.MOREX.r2.2HG0153340,HORVU.MOREX.r2.5HG0399360,HORVU.MOREX.r2.2HG0083720,HORVU.MOREX.r2.7HG0608910,HORVU.MOREX.r2.6HG0516450,HORVU.MOREX.r2.4HG0290140,HORVU.MOREX.r2.5HG0404200,HORVU.MOREX.r2.5HG0399310,HORVU.MOREX.r2.3HG0235390,HORVU.MOREX.r2.5HG0356360,HORVU.MOR…	0.00139638	0.197239	0.00461879
53	46	192	5	4	HORVU.MOREX.r2.7HG0530810,HORVU.MOREX.r2.2HG0178910,HORVU.MOREX.r2.7HG0530990,HORVU.MOREX.r2.2HG0178800,HORVU.MOREX.r2.2HG0179230	HORVU.MOREX.r2.6HG0452860,HORVU.MOREX.r2.4HG0307130,HORVU.MOREX.r2.7HG0559890,HORVU.MOREX.r2.7HG0529030	HORVU.MOREX.r2.6HG0495500,HORVU.MOREX.r2.1HG0048170,HORVU.MOREX.r2.5HG0435380,HORVU.MOREX.r2.6HG0511490,HORVU.MOREX.r2.6HG0505960,HORVU.MOREX.r2.4HG0332620,HORVU.MOREX.r2.2HG0110630,HORVU.MOREX.r2.1HG0032080,HORVU.MOREX.r2.4HG0287800,HORVU.MOREX.r2.6HG0460340,HORVU.MOREX.r2.5HG0420530,HORVU.MOREX.r2.7HG0608380,HORVU.MOREX.r2.4HG0348350,HORVU.MOREX.r2.7HG0611320,HORVU.MOREX.r2.6HG0523600,HORVU.MOR…	0.00159305	0.231581	0.00516988
54	33	60	5	2	HORVU.MOREX.r2.2HG0180770,HORVU.MOREX.r2.2HG0178910,HORVU.MOREX.r2.2HG0178800,HORVU.MOREX.r2.2HG0181050,HORVU.MOREX.r2.2HG0179230	HORVU.MOREX.r2.6HG0479210,HORVU.MOREX.r2.3HG0186000	HORVU.MOREX.r2.4HG0346040,HORVU.MOREX.r2.2HG0109000,HORVU.MOREX.r2.6HG0493290,HORVU.MOREX.r2.2HG0151180,HORVU.MOREX.r2.2HG0157290,HORVU.MOREX.r2.6HG0518150,HORVU.MOREX.r2.5HG0372090,HORVU.MOREX.r2.3HG0229430,HORVU.MOREX.r2.3HG0205590,HORVU.MOREX.r2.3HG0268420,HORVU.MOREX.r2.2HG0149220,HORVU.MOREX.r2.1HG0074290,HORVU.MOREX.r2.6HG0471110,HORVU.MOREX.r2.4HG0346110,HORVU.MOREX.r2.6HG0479210,HORVU.MOR…	0.00179632	0.157033	0.00572162
55	34	104	7	2	HORVU.MOREX.r2.2HG0178910,HORVU.MOREX.r2.2HG0099480,HORVU.MOREX.r2.2HG0179230,HORVU.MOREX.r2.7HG0615500,HORVU.MOREX.r2.2HG0178800,HORVU.MOREX.r2.2HG0099640,HORVU.MOREX.r2.2HG0099970	HORVU.MOREX.r2.7HG0617560,HORVU.MOREX.r2.2HG0102680	HORVU.MOREX.r2.4HG0348350,HORVU.MOREX.r2.7HG0615610,HORVU.MOREX.r2.7HG0617560,HORVU.MOREX.r2.3HG0239180,HORVU.MOREX.r2.7HG0581010,HORVU.MOREX.r2.4HG0293330,HORVU.MOREX.r2.3HG0225100,HORVU.MOREX.r2.3HG0226290,HORVU.MOREX.r2.3HG0264650,HORVU.MOREX.r2.2HG0102680,HORVU.MOREX.r2.1HG0028770,HORVU.MOREX.r2.4HG0324300,HORVU.MOREX.r2.1HG0034330,HORVU.MOREX.r2.4HG0320420,HORVU.MOREX.r2.2HG0116600,HORVU.MOR…	0.00185803	0.152101	0.00581056
56	38	61	4	3	HORVU.MOREX.r2.6HG0518050,HORVU.MOREX.r2.2HG0178910,HORVU.MOREX.r2.2HG0178800,HORVU.MOREX.r2.2HG0179230	HORVU.MOREX.r2.6HG0518300,HORVU.MOREX.r2.5HG0395410,HORVU.MOREX.r2.6HG0517570	HORVU.MOREX.r2.6HG0518300,HORVU.MOREX.r2.1HG0053940,HORVU.MOREX.r2.4HG0289830,HORVU.MOREX.r2.5HG0356540,HORVU.MOREX.r2.3HG0231450,HORVU.MOREX.r2.2HG0134130,HORVU.MOREX.r2.3HG0198430,HORVU.MOREX.r2.3HG0249610,HORVU.MOREX.r2.1HG0048650,HORVU.MOREX.r2.5HG0383590,HORVU.MOREX.r2.1HG0059850,HORVU.MOREX.r2.2HG0119820,HORVU.MOREX.r2.2HG0131660,HORVU.MOREX.r2.4HG0342160,HORVU.MOREX.r2.3HG0245060,HORVU.MOR…	0.00215149	0.208577	0.00660815
57	44	57	32	4	HORVU.MOREX.r2.5HG0384030,HORVU.MOREX.r2.5HG0384050,HORVU.MOREX.r2.5HG0374410,HORVU.MOREX.r2.5HG0366280,HORVU.MOREX.r2.2HG0178800,HORVU.MOREX.r2.5HG0375540,HORVU.MOREX.r2.2HG0179230,HORVU.MOREX.r2.5HG0381870,HORVU.MOREX.r2.5HG0381090,HORVU.MOREX.r2.5HG0382660,HORVU.MOREX.r2.5HG0384070,HORVU.MOREX.r2.2HG0178910,HORVU.MOREX.r2.5HG0384340,HORVU.MOREX.r2.5HG0368540,HORVU.MOREX.r2.7HG0530220,HORVU.MOR…	HORVU.MOREX.r2.7HG0530900,HORVU.MOREX.r2.7HG0618650,HORVU.MOREX.r2.5HG0370850,HORVU.MOREX.r2.4HG0279230	HORVU.MOREX.r2.2HG0148040,HORVU.MOREX.r2.5HG0411610,HORVU.MOREX.r2.5HG0402060,HORVU.MOREX.r2.3HG0251670,HORVU.MOREX.r2.4HG0279230,HORVU.MOREX.r2.4HG0327430,HORVU.MOREX.r2.2HG0083570,HORVU.MOREX.r2.1HG0044620,HORVU.MOREX.r2.7HG0567960,HORVU.MOREX.r2.4HG0321150,HORVU.MOREX.r2.7HG0610610,HORVU.MOREX.r2.7HG0530900,HORVU.MOREX.r2.3HG0232250,HORVU.MOREX.r2.1HG0070460,HORVU.MOREX.r2.3HG0244620,HORVU.MOR…	0.00232084	0.243239	0.00700323
58	49	91	6	5	HORVU.MOREX.r2.5HG0385350,HORVU.MOREX.r2.2HG0178910,HORVU.MOREX.r2.5HG0385900,HORVU.MOREX.r2.2HG0178800,HORVU.MOREX.r2.1HG0004200,HORVU.MOREX.r2.2HG0179230	HORVU.MOREX.r2.5HG0366870,HORVU.MOREX.r2.5HG0349880,HORVU.MOREX.r2.1HG0003210,HORVU.MOREX.r2.4HG0279230,HORVU.MOREX.r2.7HG0532400	HORVU.MOREX.r2.4HG0290070,HORVU.MOREX.r2.7HG0611600,HORVU.MOREX.r2.5HG0400680,HORVU.MOREX.r2.7HG0532400,HORVU.MOREX.r2.5HG0358160,HORVU.MOREX.r2.4HG0292580,HORVU.MOREX.r2.2HG0080580,HORVU.MOREX.r2.3HG0258280,HORVU.MOREX.r2.2HG0083570,HORVU.MOREX.r2.3HG0182600,HORVU.MOREX.r2.7HG0615950,HORVU.MOREX.r2.4HG0299970,HORVU.MOREX.r2.4HG0279230,HORVU.MOREX.r2.7HG0617050,HORVU.MOREX.r2.2HG0169700,HORVU.MOR…	0.00239358	0.276338	0.00709821
59	32	32	21	2	HORVU.MOREX.r2.3HG0232290,HORVU.MOREX.r2.2HG0178910,HORVU.MOREX.r2.3HG0209860,HORVU.MOREX.r2.3HG0210420,HORVU.MOREX.r2.3HG0229390,HORVU.MOREX.r2.3HG0222630,HORVU.MOREX.r2.3HG0230880,HORVU.MOREX.r2.3HG0232440,HORVU.MOREX.r2.3HG0209090,HORVU.MOREX.r2.3HG0232450,HORVU.MOREX.r2.3HG0210560,HORVU.MOREX.r2.3HG0229280,HORVU.MOREX.r2.2HG0178800,HORVU.MOREX.r2.3HG0225790,HORVU.MOREX.r2.3HG0221610,HORVU.MOR…	HORVU.MOREX.r2.5HG0369760,HORVU.MOREX.r2.3HG0209210	HORVU.MOREX.r2.3HG0236950,HORVU.MOREX.r2.6HG0515070,HORVU.MOREX.r2.3HG0209210,HORVU.MOREX.r2.3HG0218290,HORVU.MOREX.r2.5HG0369760,HORVU.MOREX.r2.3HG0241140,HORVU.MOREX.r2.7HG0549280,HORVU.MOREX.r2.6HG0471160,HORVU.MOREX.r2.2HG0105640,HORVU.MOREX.r2.7HG0589230,HORVU.MOREX.r2.5HG0389920,HORVU.MOREX.r2.5HG0398330,HORVU.MOREX.r2.6HG0493950,HORVU.MOREX.r2.3HG0247440,HORVU.MOREX.r2.7HG0593010,HORVU.MOR…	0.00278562	0.162294	0.00812079
60	42	86	6	4	HORVU.MOREX.r2.3HG0256220,HORVU.MOREX.r2.3HG0256170,HORVU.MOREX.r2.2HG0178910,HORVU.MOREX.r2.3HG0256230,HORVU.MOREX.r2.2HG0178800,HORVU.MOREX.r2.2HG0179230	HORVU.MOREX.r2.3HG0256590,HORVU.MOREX.r2.7HG0617060,HORVU.MOREX.r2.3HG0256210,HORVU.MOREX.r2.5HG0390850	HORVU.MOREX.r2.7HG0617060,HORVU.MOREX.r2.6HG0471020,HORVU.MOREX.r2.6HG0525010,HORVU.MOREX.r2.5HG0368990,HORVU.MOREX.r2.3HG0257110,HORVU.MOREX.r2.5HG0354620,HORVU.MOREX.r2.1HG0071160,HORVU.MOREX.r2.2HG0106780,HORVU.MOREX.r2.3HG0255750,HORVU.MOREX.r2.3HG0206880,HORVU.MOREX.r2.7HG0619190,HORVU.MOREX.r2.4HG0283640,HORVU.MOREX.r2.5HG0361360,HORVU.MOREX.r2.3HG0256590,HORVU.MOREX.r2.6HG0498920,HORVU.MOR…	0.00344151	0.256124	0.00964679
61	53	110	21	6	HORVU.MOREX.r2.3HG0205560,HORVU.MOREX.r2.2HG0180770,HORVU.MOREX.r2.4HG0346920,HORVU.MOREX.r2.5HG0412560,HORVU.MOREX.r2.3HG0207880,HORVU.MOREX.r2.3HG0208150,HORVU.MOREX.r2.5HG0412730,HORVU.MOREX.r2.3HG0205970,HORVU.MOREX.r2.5HG0412940,HORVU.MOREX.r2.4HG0346910,HORVU.MOREX.r2.5HG0412370,HORVU.MOREX.r2.3HG0232680,HORVU.MOREX.r2.5HG0412310,HORVU.MOREX.r2.2HG0181050,HORVU.MOREX.r2.2HG0178800,HORVU.MOR…	HORVU.MOREX.r2.4HG0346930,HORVU.MOREX.r2.3HG0206040,HORVU.MOREX.r2.5HG0424400,HORVU.MOREX.r2.2HG0166160,HORVU.MOREX.r2.5HG0412410,HORVU.MOREX.r2.7HG0568440	HORVU.MOREX.r2.7HG0544560,HORVU.MOREX.r2.6HG0448690,HORVU.MOREX.r2.3HG0213430,HORVU.MOREX.r2.7HG0613240,HORVU.MOREX.r2.2HG0142490,HORVU.MOREX.r2.4HG0347300,HORVU.MOREX.r2.5HG0424400,HORVU.MOREX.r2.3HG0265320,HORVU.MOREX.r2.6HG0501060,HORVU.MOREX.r2.7HG0596870,HORVU.MOREX.r2.2HG0151070,HORVU.MOREX.r2.4HG0284740,HORVU.MOREX.r2.7HG0568440,HORVU.MOREX.r2.6HG0508450,HORVU.MOREX.r2.4HG0346930,HORVU.MOR…	0.00347733	0.310411	0.00964679
62	53	62	16	6	HORVU.MOREX.r2.7HG0553840,HORVU.MOREX.r2.7HG0554850,HORVU.MOREX.r2.4HG0342100,HORVU.MOREX.r2.2HG0178910,HORVU.MOREX.r2.7HG0554060,HORVU.MOREX.r2.2HG0176000,HORVU.MOREX.r2.7HG0551080,HORVU.MOREX.r2.2HG0175600,HORVU.MOREX.r2.2HG0178800,HORVU.MOREX.r2.7HG0553740,HORVU.MOREX.r2.7HG0552160,HORVU.MOREX.r2.2HG0176780,HORVU.MOREX.r2.7HG0552580,HORVU.MOREX.r2.4HG0342170,HORVU.MOREX.r2.2HG0179230,HORVU.MOR…	HORVU.MOREX.r2.4HG0342150,HORVU.MOREX.r2.4HG0294660,HORVU.MOREX.r2.6HG0495360,HORVU.MOREX.r2.7HG0551550,HORVU.MOREX.r2.1HG0000470,HORVU.MOREX.r2.7HG0551540	HORVU.MOREX.r2.6HG0477020,HORVU.MOREX.r2.3HG0260960,HORVU.MOREX.r2.7HG0598160,HORVU.MOREX.r2.1HG0059670,HORVU.MOREX.r2.2HG0096570,HORVU.MOREX.r2.6HG0526520,HORVU.MOREX.r2.5HG0385760,HORVU.MOREX.r2.7HG0551540,HORVU.MOREX.r2.2HG0107970,HORVU.MOREX.r2.3HG0254290,HORVU.MOREX.r2.7HG0559870,HORVU.MOREX.r2.2HG0175140,HORVU.MOREX.r2.1HG0049300,HORVU.MOREX.r2.4HG0323910,HORVU.MOREX.r2.4HG0294660,HORVU.MOR…	0.00347733	0.310411	0.00964679
63	30	41	2	2	HORVU.MOREX.r2.2HG0180770,HORVU.MOREX.r2.2HG0181050	HORVU.MOREX.r2.7HG0568550,HORVU.MOREX.r2.2HG0096390	HORVU.MOREX.r2.5HG0354360,HORVU.MOREX.r2.1HG0015100,HORVU.MOREX.r2.2HG0079570,HORVU.MOREX.r2.7HG0550580,HORVU.MOREX.r2.5HG0349860,HORVU.MOREX.r2.1HG0062650,HORVU.MOREX.r2.3HG0203250,HORVU.MOREX.r2.1HG0037530,HORVU.MOREX.r2.1HG0015010,HORVU.MOREX.r2.2HG0102880,HORVU.MOREX.r2.7HG0601030,HORVU.MOREX.r2.2HG0096390,HORVU.MOREX.r2.4HG0281090,HORVU.MOREX.r2.5HG0402830,HORVU.MOREX.r2.5HG0404130,HORVU.MOR…	0.00429579	0.173942	0.0117282
64	35	18	5	3	HORVU.MOREX.r2.5HG0357350,HORVU.MOREX.r2.2HG0178910,HORVU.MOREX.r2.2HG0178800,HORVU.MOREX.r2.1HG0004200,HORVU.MOREX.r2.2HG0179230	HORVU.MOREX.r2.5HG0388680,HORVU.MOREX.r2.1HG0003210,HORVU.MOREX.r2.5HG0357460	HORVU.MOREX.r2.5HG0388680,HORVU.MOREX.r2.7HG0612270,HORVU.MOREX.r2.5HG0443670,HORVU.MOREX.r2.2HG0161520,HORVU.MOREX.r2.3HG0250890,HORVU.MOREX.r2.4HG0295090,HORVU.MOREX.r2.5HG0438150,HORVU.MOREX.r2.6HG0478410,HORVU.MOREX.r2.5HG0411310,HORVU.MOREX.r2.1HG0066320,HORVU.MOREX.r2.4HG0335670,HORVU.MOREX.r2.4HG0315130,HORVU.MOREX.r2.7HG0543180,HORVU.MOREX.r2.5HG0360550,HORVU.MOREX.r2.5HG0395470,HORVU.MOR…	0.00489225	0.228242	0.0131479
65	29	20	5	2	HORVU.MOREX.r2.7HG0600720,HORVU.MOREX.r2.2HG0178910,HORVU.MOREX.r2.2HG0178800,HORVU.MOREX.r2.7HG0600330,HORVU.MOREX.r2.2HG0179230	HORVU.MOREX.r2.7HG0598220,HORVU.MOREX.r2.4HG0278640	HORVU.MOREX.r2.7HG0538690,HORVU.MOREX.r2.4HG0301470,HORVU.MOREX.r2.7HG0528750,HORVU.MOREX.r2.4HG0343760,HORVU.MOREX.r2.3HG0261530,HORVU.MOREX.r2.7HG0598220,HORVU.MOREX.r2.2HG0147780,HORVU.MOREX.r2.5HG0400510,HORVU.MOREX.r2.3HG0242230,HORVU.MOREX.r2.4HG0309500,HORVU.MOREX.r2.5HG0412110,HORVU.MOREX.r2.1HG0018780,HORVU.MOREX.r2.1HG0042050,HORVU.MOREX.r2.5HG0350170,HORVU.MOREX.r2.1HG0026060,HORVU.MOR…	0.0066382	0.180414	0.0175657
66	68	176	31	10	HORVU.MOREX.r2.7HG0589750,HORVU.MOREX.r2.2HG0123500,HORVU.MOREX.r2.2HG0178800,HORVU.MOREX.r2.7HG0591580,HORVU.MOREX.r2.2HG0179230,HORVU.MOREX.r2.2HG0178910,HORVU.MOREX.r2.7HG0591410,HORVU.MOREX.r2.7HG0590580,HORVU.MOREX.r2.1HG0046280,HORVU.MOREX.r2.3HG0232840,HORVU.MOREX.r2.2HG0115460,HORVU.MOREX.r2.2HG0176780,HORVU.MOREX.r2.7HG0590460,HORVU.MOREX.r2.7HG0585580,HORVU.MOREX.r2.2HG0120170,HORVU.MOR…	HORVU.MOREX.r2.1HG0046050,HORVU.MOREX.r2.7HG0593190,HORVU.MOREX.r2.2HG0101880,HORVU.MOREX.r2.3HG0261030,HORVU.MOREX.r2.3HG0233380,HORVU.MOREX.r2.6HG0464690,HORVU.MOREX.r2.7HG0590430,HORVU.MOREX.r2.5HG0399280,HORVU.MOREX.r2.2HG0180380,HORVU.MOREX.r2.2HG0120940	HORVU.MOREX.r2.5HG0414530,HORVU.MOREX.r2.5HG0446800,HORVU.MOREX.r2.1HG0046050,HORVU.MOREX.r2.2HG0083470,HORVU.MOREX.r2.3HG0261030,HORVU.MOREX.r2.1HG0033460,HORVU.MOREX.r2.2HG0097960,HORVU.MOREX.r2.1HG0044700,HORVU.MOREX.r2.1HG0065860,HORVU.MOREX.r2.5HG0430160,HORVU.MOREX.r2.1HG0028340,HORVU.MOREX.r2.3HG0209880,HORVU.MOREX.r2.4HG0324790,HORVU.MOREX.r2.2HG0180380,HORVU.MOREX.r2.2HG0120940,HORVU.MOR…	0.00718281	0.419146	0.0187188
67	72	95	20	11	HORVU.MOREX.r2.7HG0591940,HORVU.MOREX.r2.7HG0588640,HORVU.MOREX.r2.6HG0448980,HORVU.MOREX.r2.6HG0448800,HORVU.MOREX.r2.7HG0590460,HORVU.MOREX.r2.7HG0589750,HORVU.MOREX.r2.2HG0178910,HORVU.MOREX.r2.7HG0591410,HORVU.MOREX.r2.6HG0448750,HORVU.MOREX.r2.2HG0176000,HORVU.MOREX.r2.2HG0179230,HORVU.MOREX.r2.2HG0175600,HORVU.MOREX.r2.7HG0592120,HORVU.MOREX.r2.2HG0176780,HORVU.MOREX.r2.6HG0448760,HORVU.MOR…	HORVU.MOREX.r2.UnG0633820,HORVU.MOREX.r2.2HG0084470,HORVU.MOREX.r2.6HG0447900,HORVU.MOREX.r2.6HG0447910,HORVU.MOREX.r2.7HG0590840,HORVU.MOREX.r2.4HG0327010,HORVU.MOREX.r2.7HG0552530,HORVU.MOREX.r2.6HG0447990,HORVU.MOREX.r2.6HG0447890,HORVU.MOREX.r2.6HG0448410,HORVU.MOREX.r2.7HG0550270	HORVU.MOREX.r2.1HG0077620,HORVU.MOREX.r2.3HG0223320,HORVU.MOREX.r2.5HG0433540,HORVU.MOREX.r2.6HG0513190,HORVU.MOREX.r2.2HG0150240,HORVU.MOREX.r2.6HG0447910,HORVU.MOREX.r2.6HG0447890,HORVU.MOREX.r2.4HG0323130,HORVU.MOREX.r2.7HG0558460,HORVU.MOREX.r2.2HG0153650,HORVU.MOREX.r2.3HG0260560,HORVU.MOREX.r2.5HG0445720,HORVU.MOREX.r2.6HG0510530,HORVU.MOREX.r2.5HG0430700,HORVU.MOREX.r2.7HG0622090,HORVU.MOR…	0.00876887	0.438345	0.0225111
68	89	129	48	15	HORVU.MOREX.r2.3HG0205560,HORVU.MOREX.r2.7HG0615630,HORVU.MOREX.r2.2HG0143170,HORVU.MOREX.r2.3HG0209860,HORVU.MOREX.r2.3HG0226630,HORVU.MOREX.r2.7HG0602630,HORVU.MOREX.r2.7HG0602710,HORVU.MOREX.r2.3HG0209090,HORVU.MOREX.r2.6HG0497600,HORVU.MOREX.r2.7HG0617000,HORVU.MOREX.r2.2HG0178800,HORVU.MOREX.r2.3HG0222630,HORVU.MOREX.r2.7HG0617100,HORVU.MOREX.r2.3HG0232450,HORVU.MOREX.r2.3HG0208150,HORVU.MOR…	HORVU.MOREX.r2.3HG0203420,HORVU.MOREX.r2.6HG0496300,HORVU.MOREX.r2.7HG0616470,HORVU.MOREX.r2.7HG0602740,HORVU.MOREX.r2.2HG0143050,HORVU.MOREX.r2.2HG0152440,HORVU.MOREX.r2.7HG0589460,HORVU.MOREX.r2.7HG0576130,HORVU.MOREX.r2.6HG0473420,HORVU.MOREX.r2.6HG0499610,HORVU.MOREX.r2.3HG0226270,HORVU.MOREX.r2.2HG0127290,HORVU.MOREX.r2.2HG0166800,HORVU.MOREX.r2.1HG0005340,HORVU.MOREX.r2.4HG0291220	HORVU.MOREX.r2.5HG0355280,HORVU.MOREX.r2.6HG0462060,HORVU.MOREX.r2.6HG0524990,HORVU.MOREX.r2.6HG0496300,HORVU.MOREX.r2.1HG0069450,HORVU.MOREX.r2.2HG0159290,HORVU.MOREX.r2.2HG0152440,HORVU.MOREX.r2.4HG0347650,HORVU.MOREX.r2.3HG0216340,HORVU.MOREX.r2.UnG0625130,HORVU.MOREX.r2.6HG0473420,HORVU.MOREX.r2.4HG0277350,HORVU.MOREX.r2.7HG0610600,HORVU.MOREX.r2.2HG0158430,HORVU.MOREX.r2.2HG0127290,HORVU.MOR…	0.00964423	0.492472	0.0243942
69	28	49	6	2	HORVU.MOREX.r2.2HG0178910,HORVU.MOREX.r2.2HG0176000,HORVU.MOREX.r2.2HG0175600,HORVU.MOREX.r2.2HG0178800,HORVU.MOREX.r2.2HG0176780,HORVU.MOREX.r2.2HG0179230	HORVU.MOREX.r2.6HG0501850,HORVU.MOREX.r2.4HG0302490	HORVU.MOREX.r2.5HG0422000,HORVU.MOREX.r2.6HG0501850,HORVU.MOREX.r2.3HG0214390,HORVU.MOREX.r2.5HG0364500,HORVU.MOREX.r2.5HG0368980,HORVU.MOREX.r2.4HG0302490,HORVU.MOREX.r2.3HG0246220,HORVU.MOREX.r2.5HG0406360,HORVU.MOREX.r2.7HG0590030,HORVU.MOREX.r2.5HG0365730,HORVU.MOREX.r2.6HG0513670,HORVU.MOREX.r2.4HG0305230,HORVU.MOREX.r2.3HG0212800,HORVU.MOREX.r2.7HG0554710,HORVU.MOREX.r2.7HG0567570,HORVU.MOR…	0.0105456	0.187383	0.0259121
70	28	18	3	2	HORVU.MOREX.r2.2HG0178910,HORVU.MOREX.r2.2HG0178800,HORVU.MOREX.r2.2HG0179230	HORVU.MOREX.r2.6HG0478730,HORVU.MOREX.r2.6HG0497230	HORVU.MOREX.r2.5HG0372130,HORVU.MOREX.r2.6HG0510240,HORVU.MOREX.r2.6HG0497230,HORVU.MOREX.r2.2HG0122550,HORVU.MOREX.r2.3HG0275670,HORVU.MOREX.r2.4HG0312330,HORVU.MOREX.r2.6HG0451430,HORVU.MOREX.r2.1HG0075920,HORVU.MOREX.r2.UnG0625320,HORVU.MOREX.r2.7HG0592280,HORVU.MOREX.r2.2HG0160700,HORVU.MOREX.r2.1HG0058930,HORVU.MOREX.r2.5HG0373900,HORVU.MOREX.r2.2HG0108320,HORVU.MOREX.r2.5HG0365470,HORVU.MOR…	0.0105456	0.187383	0.0259121
71	21	45	1	1	HORVU.MOREX.r2.2HG0154580	HORVU.MOREX.r2.2HG0154620	HORVU.MOREX.r2.7HG0547980,HORVU.MOREX.r2.2HG0154620,HORVU.MOREX.r2.6HG0469430,HORVU.MOREX.r2.4HG0305800,HORVU.MOREX.r2.2HG0171320,HORVU.MOREX.r2.4HG0338730,HORVU.MOREX.r2.7HG0612010,HORVU.MOREX.r2.6HG0496120,HORVU.MOREX.r2.7HG0599030,HORVU.MOREX.r2.2HG0127360,HORVU.MOREX.r2.5HG0367100,HORVU.MOREX.r2.1HG0023650,HORVU.MOREX.r2.7HG0559660	0.0136048	0.121869	0.0325004
72	21	18	4	1	HORVU.MOREX.r2.7HG0543070,HORVU.MOREX.r2.7HG0560510,HORVU.MOREX.r2.7HG0588160,HORVU.MOREX.r2.7HG0559570	HORVU.MOREX.r2.7HG0560150	HORVU.MOREX.r2.5HG0380710,HORVU.MOREX.r2.3HG0182500,HORVU.MOREX.r2.2HG0098960,HORVU.MOREX.r2.3HG0272870,HORVU.MOREX.r2.2HG0089930,HORVU.MOREX.r2.5HG0378260,HORVU.MOREX.r2.3HG0199620,HORVU.MOREX.r2.5HG0435900,HORVU.MOREX.r2.2HG0147710,HORVU.MOREX.r2.7HG0560150,HORVU.MOREX.r2.3HG0252940,HORVU.MOREX.r2.1HG0073140,HORVU.MOREX.r2.6HG0499090,HORVU.MOREX.r2.7HG0531930,HORVU.MOREX.r2.7HG0532050,HORVU.MOR…	0.0136048	0.121869	0.0325004
73	26	33	4	2	HORVU.MOREX.r2.2HG0178910,HORVU.MOREX.r2.6HG0464080,HORVU.MOREX.r2.2HG0178800,HORVU.MOREX.r2.2HG0179230	HORVU.MOREX.r2.6HG0475730,HORVU.MOREX.r2.6HG0461780	HORVU.MOREX.r2.7HG0570110,HORVU.MOREX.r2.6HG0490630,HORVU.MOREX.r2.5HG0425630,HORVU.MOREX.r2.6HG0458020,HORVU.MOREX.r2.6HG0461780,HORVU.MOREX.r2.7HG0610390,HORVU.MOREX.r2.5HG0376600,HORVU.MOREX.r2.7HG0615380,HORVU.MOREX.r2.5HG0442980,HORVU.MOREX.r2.3HG0228460,HORVU.MOREX.r2.7HG0580950,HORVU.MOREX.r2.4HG0319020,HORVU.MOREX.r2.4HG0288310,HORVU.MOREX.r2.5HG0390870,HORVU.MOREX.r2.6HG0475730,HORVU.MOR…	0.0156009	0.203064	0.0367582
74	37	64	8	4	HORVU.MOREX.r2.1HG0078740,HORVU.MOREX.r2.5HG0390630,HORVU.MOREX.r2.2HG0178910,HORVU.MOREX.r2.2HG0176000,HORVU.MOREX.r2.2HG0175600,HORVU.MOREX.r2.2HG0178800,HORVU.MOREX.r2.2HG0176780,HORVU.MOREX.r2.2HG0179230	HORVU.MOREX.r2.4HG0341440,HORVU.MOREX.r2.5HG0373560,HORVU.MOREX.r2.6HG0474680,HORVU.MOREX.r2.7HG0532700	HORVU.MOREX.r2.5HG0400500,HORVU.MOREX.r2.1HG0043060,HORVU.MOREX.r2.2HG0103920,HORVU.MOREX.r2.5HG0373560,HORVU.MOREX.r2.3HG0188200,HORVU.MOREX.r2.3HG0259330,HORVU.MOREX.r2.7HG0581320,HORVU.MOREX.r2.1HG0032070,HORVU.MOREX.r2.2HG0128650,HORVU.MOREX.r2.2HG0128300,HORVU.MOREX.r2.7HG0571840,HORVU.MOREX.r2.4HG0329040,HORVU.MOREX.r2.6HG0456150,HORVU.MOREX.r2.4HG0308050,HORVU.MOREX.r2.5HG0415950,HORVU.MOR…	0.0166651	0.295169	0.0387351
75	59	27	10	9	HORVU.MOREX.r2.2HG0180770,HORVU.MOREX.r2.7HG0529070,HORVU.MOREX.r2.2HG0178910,HORVU.MOREX.r2.2HG0143170,HORVU.MOREX.r2.2HG0176000,HORVU.MOREX.r2.2HG0175600,HORVU.MOREX.r2.2HG0178800,HORVU.MOREX.r2.2HG0176780,HORVU.MOREX.r2.2HG0179230,HORVU.MOREX.r2.2HG0181050	HORVU.MOREX.r2.6HG0514050,HORVU.MOREX.r2.7HG0610220,HORVU.MOREX.r2.2HG0143050,HORVU.MOREX.r2.5HG0446600,HORVU.MOREX.r2.6HG0450970,HORVU.MOREX.r2.2HG0143070,HORVU.MOREX.r2.7HG0529010,HORVU.MOREX.r2.7HG0568980,HORVU.MOREX.r2.7HG0586260	HORVU.MOREX.r2.4HG0334620,HORVU.MOREX.r2.6HG0514050,HORVU.MOREX.r2.1HG0077450,HORVU.MOREX.r2.7HG0588110,HORVU.MOREX.r2.7HG0573050,HORVU.MOREX.r2.UnG0630350,HORVU.MOREX.r2.4HG0284720,HORVU.MOREX.r2.2HG0175920,HORVU.MOREX.r2.5HG0349640,HORVU.MOREX.r2.5HG0401830,HORVU.MOREX.r2.7HG0568980,HORVU.MOREX.r2.2HG0143040,HORVU.MOREX.r2.4HG0320930,HORVU.MOREX.r2.7HG0534180,HORVU.MOREX.r2.7HG0549400,HORVU.MOR…	0.0204539	0.437983	0.0469077
76	134	345	22	27	HORVU.MOREX.r2.3HG0270250,HORVU.MOREX.r2.5HG0406340,HORVU.MOREX.r2.5HG0408240,HORVU.MOREX.r2.2HG0179230,HORVU.MOREX.r2.3HG0270990,HORVU.MOREX.r2.2HG0178910,HORVU.MOREX.r2.5HG0407580,HORVU.MOREX.r2.2HG0176780,HORVU.MOREX.r2.3HG0269970,HORVU.MOREX.r2.5HG0406790,HORVU.MOREX.r2.3HG0271590,HORVU.MOREX.r2.5HG0406980,HORVU.MOREX.r2.5HG0407940,HORVU.MOREX.r2.3HG0271180,HORVU.MOREX.r2.5HG0407160,HORVU.MOR…	HORVU.MOREX.r2.6HG0457250,HORVU.MOREX.r2.5HG0406710,HORVU.MOREX.r2.3HG0272150,HORVU.MOREX.r2.7HG0593780,HORVU.MOREX.r2.2HG0083020,HORVU.MOREX.r2.5HG0407540,HORVU.MOREX.r2.1HG0019150,HORVU.MOREX.r2.7HG0559680,HORVU.MOREX.r2.3HG0270820,HORVU.MOREX.r2.2HG0169270,HORVU.MOREX.r2.1HG0049020,HORVU.MOREX.r2.1HG0036700,HORVU.MOREX.r2.5HG0435830,HORVU.MOREX.r2.1HG0026120,HORVU.MOREX.r2.5HG0407080,HORVU.MOR…	HORVU.MOREX.r2.1HG0046590,HORVU.MOREX.r2.3HG0267030,HORVU.MOREX.r2.6HG0496590,HORVU.MOREX.r2.1HG0068540,HORVU.MOREX.r2.2HG0083020,HORVU.MOREX.r2.7HG0559680,HORVU.MOREX.r2.1HG0035810,HORVU.MOREX.r2.7HG0549780,HORVU.MOREX.r2.1HG0061320,HORVU.MOREX.r2.2HG0172680,HORVU.MOREX.r2.2HG0079860,HORVU.MOREX.r2.5HG0427420,HORVU.MOREX.r2.1HG0025620,HORVU.MOREX.r2.4HG0335140,HORVU.MOREX.r2.5HG0446960,HORVU.MOR…	0.0213601	0.612674	0.0483413
77	40	155	7	5	HORVU.MOREX.r2.2HG0180770,HORVU.MOREX.r2.1HG0071030,HORVU.MOREX.r2.2HG0178910,HORVU.MOREX.r2.2HG0179230,HORVU.MOREX.r2.2HG0178800,HORVU.MOREX.r2.1HG0071140,HORVU.MOREX.r2.2HG0181050	HORVU.MOREX.r2.1HG0071130,HORVU.MOREX.r2.3HG0223560,HORVU.MOREX.r2.7HG0618500,HORVU.MOREX.r2.5HG0446060,HORVU.MOREX.r2.1HG0071210	HORVU.MOREX.r2.6HG0462750,HORVU.MOREX.r2.3HG0229820,HORVU.MOREX.r2.4HG0320840,HORVU.MOREX.r2.7HG0618500,HORVU.MOREX.r2.3HG0215210,HORVU.MOREX.r2.6HG0489030,HORVU.MOREX.r2.4HG0334130,HORVU.MOREX.r2.4HG0342020,HORVU.MOREX.r2.3HG0223560,HORVU.MOREX.r2.3HG0222430,HORVU.MOREX.r2.6HG0502780,HORVU.MOREX.r2.6HG0470060,HORVU.MOREX.r2.4HG0285380,HORVU.MOREX.r2.1HG0071210,HORVU.MOREX.r2.5HG0415630,HORVU.MOR…	0.0220052	0.347902	0.0491544
78	35	117	5	4	HORVU.MOREX.r2.2HG0180770,HORVU.MOREX.r2.2HG0178910,HORVU.MOREX.r2.2HG0178800,HORVU.MOREX.r2.2HG0181050,HORVU.MOREX.r2.2HG0179230	HORVU.MOREX.r2.4HG0278810,HORVU.MOREX.r2.7HG0617060,HORVU.MOREX.r2.7HG0596340,HORVU.MOREX.r2.4HG0283500	HORVU.MOREX.r2.7HG0617060,HORVU.MOREX.r2.6HG0471020,HORVU.MOREX.r2.4HG0277580,HORVU.MOREX.r2.4HG0343570,HORVU.MOREX.r2.3HG0272070,HORVU.MOREX.r2.4HG0282910,HORVU.MOREX.r2.3HG0199220,HORVU.MOREX.r2.3HG0227140,HORVU.MOREX.r2.4HG0278810,HORVU.MOREX.r2.4HG0278420,HORVU.MOREX.r2.1HG0041020,HORVU.MOREX.r2.4HG0283500,HORVU.MOREX.r2.4HG0278480,HORVU.MOREX.r2.5HG0350030,HORVU.MOREX.r2.1HG0023190,HORVU.MOR…	0.0235412	0.314313	0.051314
79	24	54	5	2	HORVU.MOREX.r2.2HG0178910,HORVU.MOREX.r2.4HG0280240,HORVU.MOREX.r2.2HG0179230,HORVU.MOREX.r2.2HG0178800,HORVU.MOREX.r2.4HG0280200	HORVU.MOREX.r2.4HG0280220,HORVU.MOREX.r2.4HG0342490	HORVU.MOREX.r2.7HG0583780,HORVU.MOREX.r2.7HG0567850,HORVU.MOREX.r2.5HG0387370,HORVU.MOREX.r2.4HG0342490,HORVU.MOREX.r2.7HG0612230,HORVU.MOREX.r2.5HG0398650,HORVU.MOREX.r2.1HG0004810,HORVU.MOREX.r2.1HG0018930,HORVU.MOREX.r2.6HG0506560,HORVU.MOREX.r2.2HG0128610,HORVU.MOREX.r2.5HG0442540,HORVU.MOREX.r2.4HG0280220,HORVU.MOREX.r2.4HG0277180,HORVU.MOREX.r2.5HG0349610,HORVU.MOREX.r2.5HG0432990,HORVU.MOR…	0.0235687	0.221595	0.051314
80	29	44	10	3	HORVU.MOREX.r2.2HG0180770,HORVU.MOREX.r2.5HG0407940,HORVU.MOREX.r2.5HG0407160,HORVU.MOREX.r2.2HG0178910,HORVU.MOREX.r2.5HG0407090,HORVU.MOREX.r2.5HG0408240,HORVU.MOREX.r2.5HG0407580,HORVU.MOREX.r2.2HG0178800,HORVU.MOREX.r2.2HG0179230,HORVU.MOREX.r2.2HG0181050	HORVU.MOREX.r2.3HG0237800,HORVU.MOREX.r2.7HG0596940,HORVU.MOREX.r2.5HG0407080	HORVU.MOREX.r2.1HG0067230,HORVU.MOREX.r2.1HG0071510,HORVU.MOREX.r2.5HG0440310,HORVU.MOREX.r2.4HG0281260,HORVU.MOREX.r2.2HG0118970,HORVU.MOREX.r2.2HG0115500,HORVU.MOREX.r2.1HG0063710,HORVU.MOREX.r2.5HG0430160,HORVU.MOREX.r2.7HG0608910,HORVU.MOREX.r2.4HG0320350,HORVU.MOREX.r2.2HG0095380,HORVU.MOREX.r2.5HG0407080,HORVU.MOREX.r2.4HG0294180,HORVU.MOREX.r2.3HG0267720,HORVU.MOREX.r2.7HG0556010,HORVU.MOR…	0.0240862	0.281185	0.0517854
81	36	94	13	17	HORVU.MOREX.r2.1HG0054840,HORVU.MOREX.r2.1HG0055890,HORVU.MOREX.r2.1HG0055180,HORVU.MOREX.r2.1HG0052630,HORVU.MOREX.r2.1HG0055410,HORVU.MOREX.r2.1HG0054330,HORVU.MOREX.r2.1HG0050500,HORVU.MOREX.r2.1HG0052210,HORVU.MOREX.r2.1HG0056110,HORVU.MOREX.r2.1HG0052770,HORVU.MOREX.r2.1HG0050990,HORVU.MOREX.r2.1HG0054820,HORVU.MOREX.r2.1HG0048540	HORVU.MOREX.r2.1HG0051060,HORVU.MOREX.r2.1HG0055220,HORVU.MOREX.r2.1HG0050460,HORVU.MOREX.r2.1HG0052930,HORVU.MOREX.r2.1HG0051190,HORVU.MOREX.r2.1HG0049060,HORVU.MOREX.r2.1HG0049880,HORVU.MOREX.r2.1HG0054010,HORVU.MOREX.r2.1HG0055450,HORVU.MOREX.r2.1HG0054060,HORVU.MOREX.r2.1HG0050980,HORVU.MOREX.r2.1HG0052590,HORVU.MOREX.r2.1HG0053340,HORVU.MOREX.r2.1HG0052920,HORVU.MOREX.r2.1HG0047370,HORVU.MOR…	HORVU.MOREX.r2.1HG0051060,HORVU.MOREX.r2.1HG0055220,HORVU.MOREX.r2.1HG0050460,HORVU.MOREX.r2.1HG0052930,HORVU.MOREX.r2.1HG0051190,HORVU.MOREX.r2.1HG0049060,HORVU.MOREX.r2.1HG0049880,HORVU.MOREX.r2.1HG0054010,HORVU.MOREX.r2.2HG0170530,HORVU.MOREX.r2.1HG0054060,HORVU.MOREX.r2.1HG0050980,HORVU.MOREX.r2.1HG0052590,HORVU.MOREX.r2.1HG0053340,HORVU.MOREX.r2.1HG0052920,HORVU.MOREX.r2.1HG0047370,HORVU.MOR…	0.0253567	2.19495	0.0538438
82	43	125	12	6	HORVU.MOREX.r2.2HG0125890,HORVU.MOREX.r2.2HG0125810,HORVU.MOREX.r2.2HG0178910,HORVU.MOREX.r2.2HG0123500,HORVU.MOREX.r2.2HG0120460,HORVU.MOREX.r2.2HG0116130,HORVU.MOREX.r2.2HG0115460,HORVU.MOREX.r2.2HG0115960,HORVU.MOREX.r2.2HG0120970,HORVU.MOREX.r2.2HG0178800,HORVU.MOREX.r2.2HG0120170,HORVU.MOREX.r2.2HG0179230	HORVU.MOREX.r2.5HG0400930,HORVU.MOREX.r2.2HG0123990,HORVU.MOREX.r2.2HG0115240,HORVU.MOREX.r2.2HG0114710,HORVU.MOREX.r2.2HG0125160,HORVU.MOREX.r2.2HG0120940	HORVU.MOREX.r2.7HG0603180,HORVU.MOREX.r2.7HG0575810,HORVU.MOREX.r2.5HG0404080,HORVU.MOREX.r2.2HG0115240,HORVU.MOREX.r2.1HG0035740,HORVU.MOREX.r2.6HG0459230,HORVU.MOREX.r2.2HG0125160,HORVU.MOREX.r2.2HG0120940,HORVU.MOREX.r2.4HG0335940,HORVU.MOREX.r2.4HG0294930,HORVU.MOREX.r2.5HG0425680,HORVU.MOREX.r2.4HG0284490,HORVU.MOREX.r2.4HG0288860,HORVU.MOREX.r2.6HG0453610,HORVU.MOREX.r2.4HG0281810,HORVU.MOR…	0.0282962	0.394943	0.0591143
83	66	299	13	11	HORVU.MOREX.r2.3HG0205560,HORVU.MOREX.r2.3HG0205970,HORVU.MOREX.r2.3HG0207880,HORVU.MOREX.r2.3HG0208150,HORVU.MOREX.r2.3HG0232680,HORVU.MOREX.r2.5HG0432060,HORVU.MOREX.r2.5HG0432230,HORVU.MOREX.r2.3HG0222600,HORVU.MOREX.r2.5HG0432200,HORVU.MOREX.r2.5HG0432490,HORVU.MOREX.r2.5HG0432020,HORVU.MOREX.r2.5HG0432030,HORVU.MOREX.r2.5HG0431990	HORVU.MOREX.r2.3HG0209720,HORVU.MOREX.r2.3HG0203420,HORVU.MOREX.r2.7HG0563040,HORVU.MOREX.r2.5HG0432010,HORVU.MOREX.r2.3HG0221270,HORVU.MOREX.r2.3HG0208240,HORVU.MOREX.r2.3HG0246770,HORVU.MOREX.r2.3HG0206040,HORVU.MOREX.r2.2HG0094200,HORVU.MOREX.r2.3HG0205440,HORVU.MOREX.r2.3HG0207560	HORVU.MOREX.r2.3HG0197100,HORVU.MOREX.r2.4HG0280410,HORVU.MOREX.r2.7HG0611040,HORVU.MOREX.r2.3HG0206040,HORVU.MOREX.r2.4HG0317500,HORVU.MOREX.r2.1HG0047420,HORVU.MOREX.r2.3HG0207560,HORVU.MOREX.r2.2HG0123910,HORVU.MOREX.r2.4HG0329770,HORVU.MOREX.r2.3HG0258190,HORVU.MOREX.r2.7HG0563040,HORVU.MOREX.r2.7HG0561670,HORVU.MOREX.r2.5HG0414960,HORVU.MOREX.r2.7HG0581610,HORVU.MOREX.r2.3HG0190470,HORVU.MOR…	0.0286261	0.486638	0.0591143
84	44	403	13	6	HORVU.MOREX.r2.5HG0436030,HORVU.MOREX.r2.5HG0436100,HORVU.MOREX.r2.2HG0178910,HORVU.MOREX.r2.5HG0436230,HORVU.MOREX.r2.5HG0435820,HORVU.MOREX.r2.7HG0606100,HORVU.MOREX.r2.2HG0179230,HORVU.MOREX.r2.5HG0436080,HORVU.MOREX.r2.2HG0178800,HORVU.MOREX.r2.5HG0435890,HORVU.MOREX.r2.5HG0436630,HORVU.MOREX.r2.7HG0606320,HORVU.MOREX.r2.5HG0435910	HORVU.MOREX.r2.5HG0435220,HORVU.MOREX.r2.7HG0606030,HORVU.MOREX.r2.7HG0606280,HORVU.MOREX.r2.4HG0322020,HORVU.MOREX.r2.7HG0605630,HORVU.MOREX.r2.7HG0606070	HORVU.MOREX.r2.5HG0435220,HORVU.MOREX.r2.1HG0004830,HORVU.MOREX.r2.6HG0453580,HORVU.MOREX.r2.5HG0404000,HORVU.MOREX.r2.7HG0606070,HORVU.MOREX.r2.2HG0081770,HORVU.MOREX.r2.6HG0452280,HORVU.MOREX.r2.6HG0464240,HORVU.MOREX.r2.7HG0606280,HORVU.MOREX.r2.6HG0452310,HORVU.MOREX.r2.6HG0452270,HORVU.MOREX.r2.5HG0434240,HORVU.MOREX.r2.7HG0546760,HORVU.MOREX.r2.2HG0167500,HORVU.MOREX.r2.5HG0414290,HORVU.MOR…	0.0288698	0.384488	0.0591143
85	38	87	4	5	HORVU.MOREX.r2.2HG0176780,HORVU.MOREX.r2.2HG0175600,HORVU.MOREX.r2.6HG0509850,HORVU.MOREX.r2.2HG0176000	HORVU.MOREX.r2.7HG0605640,HORVU.MOREX.r2.7HG0605530,HORVU.MOREX.r2.7HG0605700,HORVU.MOREX.r2.7HG0604920,HORVU.MOREX.r2.3HG0240830	HORVU.MOREX.r2.2HG0093980,HORVU.MOREX.r2.7HG0605640,HORVU.MOREX.r2.4HG0289830,HORVU.MOREX.r2.6HG0456120,HORVU.MOREX.r2.4HG0314620,HORVU.MOREX.r2.7HG0605700,HORVU.MOREX.r2.1HG0036380,HORVU.MOREX.r2.7HG0605530,HORVU.MOREX.r2.2HG0149270,HORVU.MOREX.r2.2HG0175460,HORVU.MOREX.r2.5HG0377040,HORVU.MOREX.r2.7HG0585920,HORVU.MOREX.r2.7HG0604920,HORVU.MOREX.r2.3HG0240830,HORVU.MOREX.r2.4HG0342160,HORVU.MOR…	0.0310513	0.369106	0.0628333
86	39	39	15	5	HORVU.MOREX.r2.2HG0161300,HORVU.MOREX.r2.2HG0178910,HORVU.MOREX.r2.1HG0002570,HORVU.MOREX.r2.2HG0161940,HORVU.MOREX.r2.2HG0161480,HORVU.MOREX.r2.2HG0162210,HORVU.MOREX.r2.2HG0160980,HORVU.MOREX.r2.4HG0278890,HORVU.MOREX.r2.4HG0291260,HORVU.MOREX.r2.1HG0002180,HORVU.MOREX.r2.1HG0001750,HORVU.MOREX.r2.2HG0178800,HORVU.MOREX.r2.1HG0001710,HORVU.MOREX.r2.2HG0179230,HORVU.MOREX.r2.1HG0002560	HORVU.MOREX.r2.2HG0162620,HORVU.MOREX.r2.2HG0153500,HORVU.MOREX.r2.7HG0594080,HORVU.MOREX.r2.5HG0381800,HORVU.MOREX.r2.4HG0278830	HORVU.MOREX.r2.5HG0366920,HORVU.MOREX.r2.5HG0387750,HORVU.MOREX.r2.6HG0490240,HORVU.MOREX.r2.2HG0161910,HORVU.MOREX.r2.2HG0105740,HORVU.MOREX.r2.2HG0091490,HORVU.MOREX.r2.5HG0383720,HORVU.MOREX.r2.7HG0599700,HORVU.MOREX.r2.5HG0425610,HORVU.MOREX.r2.2HG0171010,HORVU.MOREX.r2.7HG0551700,HORVU.MOREX.r2.6HG0480120,HORVU.MOREX.r2.7HG0527260,HORVU.MOREX.r2.4HG0278830,HORVU.MOREX.r2.4HG0323710,HORVU.MOR…	0.0319843	0.358192	0.0639686
87	33	63	5	4	HORVU.MOREX.r2.2HG0178910,HORVU.MOREX.r2.5HG0353950,HORVU.MOREX.r2.3HG0254820,HORVU.MOREX.r2.2HG0178800,HORVU.MOREX.r2.2HG0179230	HORVU.MOREX.r2.5HG0353320,HORVU.MOREX.r2.5HG0353620,HORVU.MOREX.r2.6HG0524510,HORVU.MOREX.r2.3HG0249180	HORVU.MOREX.r2.6HG0500330,HORVU.MOREX.r2.2HG0168940,HORVU.MOREX.r2.4HG0339290,HORVU.MOREX.r2.3HG0249280,HORVU.MOREX.r2.5HG0353320,HORVU.MOREX.r2.2HG0179120,HORVU.MOREX.r2.1HG0029250,HORVU.MOREX.r2.5HG0412850,HORVU.MOREX.r2.1HG0061100,HORVU.MOREX.r2.4HG0277470,HORVU.MOREX.r2.3HG0249050,HORVU.MOREX.r2.3HG0249310,HORVU.MOREX.r2.3HG0254180,HORVU.MOREX.r2.2HG0154910,HORVU.MOREX.r2.6HG0516930,HORVU.MOR…	0.033586	0.336098	0.0663998
88	81	93	17	15	HORVU.MOREX.r2.2HG0180770,HORVU.MOREX.r2.3HG0235250,HORVU.MOREX.r2.6HG0497740,HORVU.MOREX.r2.6HG0518480,HORVU.MOREX.r2.6HG0501180,HORVU.MOREX.r2.6HG0513640,HORVU.MOREX.r2.3HG0234880,HORVU.MOREX.r2.3HG0242400,HORVU.MOREX.r2.6HG0497600,HORVU.MOREX.r2.6HG0497450,HORVU.MOREX.r2.3HG0242430,HORVU.MOREX.r2.5HG0410690,HORVU.MOREX.r2.6HG0513710,HORVU.MOREX.r2.3HG0234750,HORVU.MOREX.r2.6HG0513610,HORVU.MOR…	HORVU.MOREX.r2.6HG0501250,HORVU.MOREX.r2.6HG0497530,HORVU.MOREX.r2.1HG0043700,HORVU.MOREX.r2.3HG0242140,HORVU.MOREX.r2.6HG0496300,HORVU.MOREX.r2.3HG0242390,HORVU.MOREX.r2.6HG0491730,HORVU.MOREX.r2.2HG0156230,HORVU.MOREX.r2.6HG0519230,HORVU.MOREX.r2.5HG0412550,HORVU.MOREX.r2.3HG0229860,HORVU.MOREX.r2.3HG0235170,HORVU.MOREX.r2.6HG0513490,HORVU.MOREX.r2.6HG0502510,HORVU.MOREX.r2.6HG0519270	HORVU.MOREX.r2.6HG0496420,HORVU.MOREX.r2.1HG0043700,HORVU.MOREX.r2.3HG0242140,HORVU.MOREX.r2.6HG0496300,HORVU.MOREX.r2.2HG0156230,HORVU.MOREX.r2.6HG0473090,HORVU.MOREX.r2.3HG0212540,HORVU.MOREX.r2.2HG0151900,HORVU.MOREX.r2.3HG0229860,HORVU.MOREX.r2.1HG0037230,HORVU.MOREX.r2.6HG0513490,HORVU.MOREX.r2.7HG0580560,HORVU.MOREX.r2.5HG0423670,HORVU.MOREX.r2.6HG0519460,HORVU.MOREX.r2.2HG0120150,HORVU.MOR…	0.036517	0.552884	0.0712491
89	82	252	36	15	HORVU.MOREX.r2.7HG0539830,HORVU.MOREX.r2.7HG0554980,HORVU.MOREX.r2.1HG0065920,HORVU.MOREX.r2.1HG0065680,HORVU.MOREX.r2.UnG0631250,HORVU.MOREX.r2.4HG0288360,HORVU.MOREX.r2.2HG0178800,HORVU.MOREX.r2.2HG0179230,HORVU.MOREX.r2.7HG0540350,HORVU.MOREX.r2.7HG0540230,HORVU.MOREX.r2.1HG0065490,HORVU.MOREX.r2.4HG0287820,HORVU.MOREX.r2.2HG0178910,HORVU.MOREX.r2.1HG0005040,HORVU.MOREX.r2.1HG0066030,HORVU.MOR…	HORVU.MOREX.r2.7HG0550890,HORVU.MOREX.r2.6HG0522550,HORVU.MOREX.r2.3HG0206450,HORVU.MOREX.r2.7HG0539920,HORVU.MOREX.r2.4HG0345700,HORVU.MOREX.r2.3HG0261560,HORVU.MOREX.r2.1HG0066450,HORVU.MOREX.r2.7HG0621900,HORVU.MOREX.r2.1HG0012520,HORVU.MOREX.r2.4HG0289350,HORVU.MOREX.r2.7HG0531000,HORVU.MOREX.r2.5HG0415550,HORVU.MOREX.r2.4HG0340370,HORVU.MOREX.r2.1HG0005340,HORVU.MOREX.r2.1HG0006250	HORVU.MOREX.r2.7HG0606560,HORVU.MOREX.r2.7HG0550890,HORVU.MOREX.r2.4HG0340370,HORVU.MOREX.r2.2HG0136060,HORVU.MOREX.r2.3HG0200670,HORVU.MOREX.r2.2HG0178540,HORVU.MOREX.r2.5HG0370270,HORVU.MOREX.r2.3HG0233730,HORVU.MOREX.r2.3HG0183620,HORVU.MOREX.r2.1HG0046570,HORVU.MOREX.r2.7HG0621340,HORVU.MOREX.r2.3HG0274420,HORVU.MOREX.r2.6HG0522550,HORVU.MOREX.r2.6HG0521730,HORVU.MOREX.r2.1HG0060290,HORVU.MOR…	0.0368673	0.544543	0.0712491
90	56	65	14	9	HORVU.MOREX.r2.2HG0180770,HORVU.MOREX.r2.7HG0619360,HORVU.MOREX.r2.5HG0406980,HORVU.MOREX.r2.5HG0406340,HORVU.MOREX.r2.2HG0178910,HORVU.MOREX.r2.7HG0619420,HORVU.MOREX.r2.2HG0178800,HORVU.MOREX.r2.7HG0619040,HORVU.MOREX.r2.7HG0619460,HORVU.MOREX.r2.5HG0406790,HORVU.MOREX.r2.7HG0621290,HORVU.MOREX.r2.2HG0179230,HORVU.MOREX.r2.2HG0181050,HORVU.MOREX.r2.7HG0619030	HORVU.MOREX.r2.5HG0391760,HORVU.MOREX.r2.5HG0406220,HORVU.MOREX.r2.7HG0621050,HORVU.MOREX.r2.4HG0332480,HORVU.MOREX.r2.3HG0246020,HORVU.MOREX.r2.3HG0235650,HORVU.MOREX.r2.2HG0130400,HORVU.MOREX.r2.6HG0502270,HORVU.MOREX.r2.7HG0619400	HORVU.MOREX.r2.7HG0597230,HORVU.MOREX.r2.5HG0437610,HORVU.MOREX.r2.5HG0406220,HORVU.MOREX.r2.2HG0157120,HORVU.MOREX.r2.1HG0043460,HORVU.MOREX.r2.1HG0022310,HORVU.MOREX.r2.4HG0332480,HORVU.MOREX.r2.3HG0246020,HORVU.MOREX.r2.3HG0235650,HORVU.MOREX.r2.6HG0511220,HORVU.MOREX.r2.6HG0459050,HORVU.MOREX.r2.5HG0421310,HORVU.MOREX.r2.3HG0246000,HORVU.MOREX.r2.2HG0136710,HORVU.MOREX.r2.7HG0558950,HORVU.MOR…	0.0375046	0.466166	0.0716755
91	65	96	13	11	HORVU.MOREX.r2.2HG0180770,HORVU.MOREX.r2.1HG0003070,HORVU.MOREX.r2.2HG0178910,HORVU.MOREX.r2.7HG0623230,HORVU.MOREX.r2.2HG0176000,HORVU.MOREX.r2.5HG0411900,HORVU.MOREX.r2.2HG0175600,HORVU.MOREX.r2.2HG0178800,HORVU.MOREX.r2.1HG0003500,HORVU.MOREX.r2.2HG0176780,HORVU.MOREX.r2.1HG0003400,HORVU.MOREX.r2.2HG0179230,HORVU.MOREX.r2.2HG0181050	HORVU.MOREX.r2.7HG0589510,HORVU.MOREX.r2.7HG0601460,HORVU.MOREX.r2.3HG0251030,HORVU.MOREX.r2.5HG0411550,HORVU.MOREX.r2.5HG0390750,HORVU.MOREX.r2.7HG0590430,HORVU.MOREX.r2.4HG0304790,HORVU.MOREX.r2.1HG0059060,HORVU.MOREX.r2.2HG0130920,HORVU.MOREX.r2.7HG0623480,HORVU.MOREX.r2.1HG0003010	HORVU.MOREX.r2.6HG0474240,HORVU.MOREX.r2.7HG0614750,HORVU.MOREX.r2.7HG0550680,HORVU.MOREX.r2.5HG0390750,HORVU.MOREX.r2.3HG0199020,HORVU.MOREX.r2.7HG0599030,HORVU.MOREX.r2.1HG0057810,HORVU.MOREX.r2.1HG0059060,HORVU.MOREX.r2.3HG0191590,HORVU.MOREX.r2.2HG0130920,HORVU.MOREX.r2.1HG0003010,HORVU.MOREX.r2.5HG0416230,HORVU.MOREX.r2.7HG0623480,HORVU.MOREX.r2.7HG0563210,HORVU.MOREX.r2.7HG0601460,HORVU.MOR…	0.0384963	0.49573	0.0724397
92	35	36	4	16	HORVU.MOREX.r2.2HG0126790,HORVU.MOREX.r2.6HG0463100,HORVU.MOREX.r2.2HG0175120,HORVU.MOREX.r2.2HG0174990	HORVU.MOREX.r2.2HG0172920,HORVU.MOREX.r2.6HG0463090,HORVU.MOREX.r2.5HG0363290,HORVU.MOREX.r2.6HG0460890,HORVU.MOREX.r2.2HG0172200,HORVU.MOREX.r2.2HG0160030,HORVU.MOREX.r2.6HG0475370,HORVU.MOREX.r2.6HG0461250,HORVU.MOREX.r2.6HG0461240,HORVU.MOREX.r2.2HG0126300,HORVU.MOREX.r2.6HG0460610,HORVU.MOREX.r2.6HG0460390,HORVU.MOREX.r2.1HG0045910,HORVU.MOREX.r2.7HG0611760,HORVU.MOREX.r2.5HG0421980,HORVU.MOR…	HORVU.MOREX.r2.2HG0172920,HORVU.MOREX.r2.2HG0136730,HORVU.MOREX.r2.7HG0561690,HORVU.MOREX.r2.3HG0238690,HORVU.MOREX.r2.6HG0460390,HORVU.MOREX.r2.7HG0561590,HORVU.MOREX.r2.3HG0182370,HORVU.MOREX.r2.5HG0363290,HORVU.MOREX.r2.2HG0172200,HORVU.MOREX.r2.5HG0376060,HORVU.MOREX.r2.1HG0045910,HORVU.MOREX.r2.7HG0611760,HORVU.MOREX.r2.3HG0239660,HORVU.MOREX.r2.6HG0463090,HORVU.MOREX.r2.1HG0000050,HORVU.MOR…	0.0387468	2.06502	0.0724397
93	77	241	29	14	HORVU.MOREX.r2.3HG0205560,HORVU.MOREX.r2.1HG0073610,HORVU.MOREX.r2.7HG0617840,HORVU.MOREX.r2.2HG0178800,HORVU.MOREX.r2.7HG0598750,HORVU.MOREX.r2.2HG0179230,HORVU.MOREX.r2.7HG0618210,HORVU.MOREX.r2.4HG0281110,HORVU.MOREX.r2.7HG0621290,HORVU.MOREX.r2.2HG0178910,HORVU.MOREX.r2.7HG0618830,HORVU.MOREX.r2.4HG0335300,HORVU.MOREX.r2.2HG0176780,HORVU.MOREX.r2.4HG0332490,HORVU.MOREX.r2.3HG0208150,HORVU.MOR…	HORVU.MOREX.r2.4HG0281420,HORVU.MOREX.r2.7HG0619280,HORVU.MOREX.r2.7HG0618380,HORVU.MOREX.r2.3HG0198600,HORVU.MOREX.r2.7HG0618600,HORVU.MOREX.r2.1HG0073230,HORVU.MOREX.r2.5HG0400820,HORVU.MOREX.r2.3HG0246770,HORVU.MOREX.r2.3HG0206640,HORVU.MOREX.r2.7HG0598590,HORVU.MOREX.r2.4HG0281100,HORVU.MOREX.r2.7HG0617870,HORVU.MOREX.r2.4HG0282730,HORVU.MOREX.r2.7HG0620940	HORVU.MOREX.r2.4HG0281420,HORVU.MOREX.r2.3HG0216640,HORVU.MOREX.r2.6HG0483250,HORVU.MOREX.r2.3HG0198600,HORVU.MOREX.r2.3HG0210540,HORVU.MOREX.r2.1HG0073230,HORVU.MOREX.r2.3HG0262260,HORVU.MOREX.r2.4HG0281100,HORVU.MOREX.r2.7HG0589610,HORVU.MOREX.r2.2HG0086780,HORVU.MOREX.r2.4HG0330390,HORVU.MOREX.r2.4HG0338140,HORVU.MOREX.r2.7HG0618380,HORVU.MOREX.r2.2HG0108430,HORVU.MOREX.r2.4HG0284170,HORVU.MOR…	0.042664	0.540647	0.0789054
94	45	196	41	7	HORVU.MOREX.r2.5HG0384030,HORVU.MOREX.r2.5HG0384050,HORVU.MOREX.r2.5HG0374410,HORVU.MOREX.r2.5HG0366280,HORVU.MOREX.r2.6HG0506400,HORVU.MOREX.r2.2HG0178800,HORVU.MOREX.r2.6HG0506430,HORVU.MOREX.r2.6HG0506300,HORVU.MOREX.r2.5HG0375540,HORVU.MOREX.r2.2HG0179230,HORVU.MOREX.r2.5HG0381870,HORVU.MOREX.r2.5HG0381090,HORVU.MOREX.r2.5HG0382660,HORVU.MOREX.r2.5HG0384070,HORVU.MOREX.r2.2HG0178910,HORVU.MOR…	HORVU.MOREX.r2.5HG0363830,HORVU.MOREX.r2.5HG0429320,HORVU.MOREX.r2.6HG0476630,HORVU.MOREX.r2.1HG0041250,HORVU.MOREX.r2.6HG0505220,HORVU.MOREX.r2.7HG0599290,HORVU.MOREX.r2.6HG0506910	HORVU.MOREX.r2.5HG0354360,HORVU.MOREX.r2.7HG0529160,HORVU.MOREX.r2.5HG0363830,HORVU.MOREX.r2.7HG0554840,HORVU.MOREX.r2.1HG0041250,HORVU.MOREX.r2.3HG0267130,HORVU.MOREX.r2.5HG0422070,HORVU.MOREX.r2.4HG0277620,HORVU.MOREX.r2.2HG0159680,HORVU.MOREX.r2.3HG0181450,HORVU.MOREX.r2.5HG0429310,HORVU.MOREX.r2.7HG0529420,HORVU.MOREX.r2.6HG0483850,HORVU.MOREX.r2.7HG0574340,HORVU.MOREX.r2.6HG0506910,HORVU.MOR…	0.0481014	0.448746	0.0864076
95	45	79	16	7	HORVU.MOREX.r2.2HG0180770,HORVU.MOREX.r2.7HG0553840,HORVU.MOREX.r2.7HG0554850,HORVU.MOREX.r2.7HG0611270,HORVU.MOREX.r2.7HG0611300,HORVU.MOREX.r2.2HG0178910,HORVU.MOREX.r2.7HG0554060,HORVU.MOREX.r2.7HG0552160,HORVU.MOREX.r2.7HG0611660,HORVU.MOREX.r2.7HG0551080,HORVU.MOREX.r2.2HG0178800,HORVU.MOREX.r2.7HG0553740,HORVU.MOREX.r2.7HG0552580,HORVU.MOREX.r2.7HG0611240,HORVU.MOREX.r2.2HG0179230,HORVU.MOR…	HORVU.MOREX.r2.5HG0380000,HORVU.MOREX.r2.2HG0147250,HORVU.MOREX.r2.6HG0492010,HORVU.MOREX.r2.7HG0551550,HORVU.MOREX.r2.7HG0551540,HORVU.MOREX.r2.4HG0295580,HORVU.MOREX.r2.7HG0610850	HORVU.MOREX.r2.7HG0598710,HORVU.MOREX.r2.2HG0136730,HORVU.MOREX.r2.5HG0425670,HORVU.MOREX.r2.2HG0159320,HORVU.MOREX.r2.7HG0610860,HORVU.MOREX.r2.3HG0248040,HORVU.MOREX.r2.7HG0551540,HORVU.MOREX.r2.5HG0380000,HORVU.MOREX.r2.7HG0565960,HORVU.MOREX.r2.7HG0603260,HORVU.MOREX.r2.4HG0295580,HORVU.MOREX.r2.5HG0349260,HORVU.MOREX.r2.7HG0610970,HORVU.MOREX.r2.1HG0043780,HORVU.MOREX.r2.4HG0277800,HORVU.MOR…	0.0481014	0.448746	0.0864076
96	31	73	8	4	HORVU.MOREX.r2.4HG0321060,HORVU.MOREX.r2.4HG0321070,HORVU.MOREX.r2.4HG0320920,HORVU.MOREX.r2.4HG0321730,HORVU.MOREX.r2.4HG0321200,HORVU.MOREX.r2.4HG0321340,HORVU.MOREX.r2.4HG0320490,HORVU.MOREX.r2.4HG0321390	HORVU.MOREX.r2.4HG0321350,HORVU.MOREX.r2.4HG0320220,HORVU.MOREX.r2.4HG0321020,HORVU.MOREX.r2.4HG0320720	HORVU.MOREX.r2.1HG0077240,HORVU.MOREX.r2.6HG0511950,HORVU.MOREX.r2.7HG0541760,HORVU.MOREX.r2.4HG0320220,HORVU.MOREX.r2.4HG0321350,HORVU.MOREX.r2.4HG0346310,HORVU.MOREX.r2.1HG0044480,HORVU.MOREX.r2.5HG0378980,HORVU.MOREX.r2.1HG0034670,HORVU.MOREX.r2.2HG0136660,HORVU.MOREX.r2.7HG0551980,HORVU.MOREX.r2.1HG0051580,HORVU.MOREX.r2.2HG0180540,HORVU.MOREX.r2.4HG0291940,HORVU.MOREX.r2.4HG0346300,HORVU.MOR…	0.0482275	0.361111	0.0864076
97	32	75	6	4	HORVU.MOREX.r2.2HG0178910,HORVU.MOREX.r2.2HG0176000,HORVU.MOREX.r2.2HG0175600,HORVU.MOREX.r2.2HG0178800,HORVU.MOREX.r2.2HG0176780,HORVU.MOREX.r2.2HG0179230	HORVU.MOREX.r2.7HG0596060,HORVU.MOREX.r2.5HG0429320,HORVU.MOREX.r2.2HG0176250,HORVU.MOREX.r2.6HG0490180	HORVU.MOREX.r2.1HG0040480,HORVU.MOREX.r2.4HG0290070,HORVU.MOREX.r2.2HG0166910,HORVU.MOREX.r2.1HG0049380,HORVU.MOREX.r2.7HG0537330,HORVU.MOREX.r2.3HG0241460,HORVU.MOREX.r2.7HG0596060,HORVU.MOREX.r2.7HG0529350,HORVU.MOREX.r2.3HG0240030,HORVU.MOREX.r2.1HG0051870,HORVU.MOREX.r2.1HG0006370,HORVU.MOREX.r2.5HG0429310,HORVU.MOREX.r2.2HG0172430,HORVU.MOREX.r2.2HG0145950,HORVU.MOREX.r2.3HG0211370,HORVU.MOR…	0.0488682	0.348158	0.0866529
98	26	35	4	3	HORVU.MOREX.r2.UnG0630370,HORVU.MOREX.r2.2HG0178910,HORVU.MOREX.r2.2HG0178800,HORVU.MOREX.r2.2HG0179230	HORVU.MOREX.r2.2HG0110800,HORVU.MOREX.r2.6HG0494000,HORVU.MOREX.r2.5HG0426900	HORVU.MOREX.r2.4HG0275940,HORVU.MOREX.r2.3HG0184790,HORVU.MOREX.r2.4HG0282540,HORVU.MOREX.r2.2HG0109550,HORVU.MOREX.r2.2HG0109390,HORVU.MOREX.r2.1HG0040810,HORVU.MOREX.r2.4HG0281770,HORVU.MOREX.r2.7HG0613400,HORVU.MOREX.r2.4HG0338140,HORVU.MOREX.r2.4HG0295930,HORVU.MOREX.r2.7HG0550870,HORVU.MOREX.r2.2HG0126960,HORVU.MOREX.r2.2HG0147940,HORVU.MOREX.r2.6HG0472890,HORVU.MOREX.r2.1HG0055140,HORVU.MOR…	0.0518268	0.318015	0.0900425
99	26	45	5	3	HORVU.MOREX.r2.6HG0505350,HORVU.MOREX.r2.2HG0178910,HORVU.MOREX.r2.6HG0505470,HORVU.MOREX.r2.2HG0178800,HORVU.MOREX.r2.2HG0179230	HORVU.MOREX.r2.3HG0262310,HORVU.MOREX.r2.6HG0513850,HORVU.MOREX.r2.6HG0522550	HORVU.MOREX.r2.6HG0513850,HORVU.MOREX.r2.7HG0580950,HORVU.MOREX.r2.6HG0522550,HORVU.MOREX.r2.2HG0136060,HORVU.MOREX.r2.5HG0385770,HORVU.MOREX.r2.4HG0296160,HORVU.MOREX.r2.2HG0079720,HORVU.MOREX.r2.4HG0337250,HORVU.MOREX.r2.3HG0262310,HORVU.MOREX.r2.4HG0297980,HORVU.MOREX.r2.6HG0505460,HORVU.MOREX.r2.4HG0325160,HORVU.MOREX.r2.3HG0262320,HORVU.MOREX.r2.3HG0262240,HORVU.MOREX.r2.6HG0470340,HORVU.MOR…	0.0518268	0.318015	0.0900425
100	22	28	5	2	HORVU.MOREX.r2.2HG0180770,HORVU.MOREX.r2.2HG0178910,HORVU.MOREX.r2.2HG0178800,HORVU.MOREX.r2.2HG0181050,HORVU.MOREX.r2.2HG0179230	HORVU.MOREX.r2.5HG0349330,HORVU.MOREX.r2.6HG0524510	HORVU.MOREX.r2.2HG0168940,HORVU.MOREX.r2.7HG0569990,HORVU.MOREX.r2.4HG0342270,HORVU.MOREX.r2.6HG0498140,HORVU.MOREX.r2.6HG0521210,HORVU.MOREX.r2.1HG0075630,HORVU.MOREX.r2.5HG0412520,HORVU.MOREX.r2.2HG0163220,HORVU.MOREX.r2.6HG0501730,HORVU.MOREX.r2.3HG0275030,HORVU.MOREX.r2.1HG0073870,HORVU.MOREX.r2.6HG0521260,HORVU.MOREX.r2.5HG0349330,HORVU.MOREX.r2.6HG0524510,HORVU.MOREX.r2.1HG0040670,HORVU.MOR…	0.0561332	0.243833	0.0965492
101	34	62	18	15	HORVU.MOREX.r2.7HG0539830,HORVU.MOREX.r2.7HG0540350,HORVU.MOREX.r2.3HG0268400,HORVU.MOREX.r2.3HG0267290,HORVU.MOREX.r2.3HG0259440,HORVU.MOREX.r2.4HG0316430,HORVU.MOREX.r2.UnG0631250,HORVU.MOREX.r2.2HG0178910,HORVU.MOREX.r2.7HG0540230,HORVU.MOREX.r2.3HG0203410,HORVU.MOREX.r2.7HG0539630,HORVU.MOREX.r2.7HG0540180,HORVU.MOREX.r2.2HG0178800,HORVU.MOREX.r2.3HG0268390,HORVU.MOREX.r2.3HG0204680,HORVU.MOR…	HORVU.MOREX.r2.3HG0267820,HORVU.MOREX.r2.3HG0230130,HORVU.MOREX.r2.3HG0266890,HORVU.MOREX.r2.3HG0268150,HORVU.MOREX.r2.7HG0539920,HORVU.MOREX.r2.3HG0266850,HORVU.MOREX.r2.3HG0231570,HORVU.MOREX.r2.3HG0268810,HORVU.MOREX.r2.3HG0203570,HORVU.MOREX.r2.3HG0259040,HORVU.MOREX.r2.1HG0000210,HORVU.MOREX.r2.2HG0133160,HORVU.MOREX.r2.3HG0267050,HORVU.MOREX.r2.3HG0268300,HORVU.MOREX.r2.3HG0267870	HORVU.MOREX.r2.4HG0332140,HORVU.MOREX.r2.3HG0266890,HORVU.MOREX.r2.5HG0378770,HORVU.MOREX.r2.3HG0266850,HORVU.MOREX.r2.4HG0317200,HORVU.MOREX.r2.3HG0268090,HORVU.MOREX.r2.3HG0267050,HORVU.MOREX.r2.1HG0020280,HORVU.MOREX.r2.3HG0203570,HORVU.MOREX.r2.1HG0000210,HORVU.MOREX.r2.2HG0133160,HORVU.MOREX.r2.3HG0268150,HORVU.MOREX.r2.3HG0268300,HORVU.MOREX.r2.3HG0267870,HORVU.MOREX.r2.3HG0220940,HORVU.MOR…	0.0590199	1.93519	0.100509
102	38	56	4	6	HORVU.MOREX.r2.7HG0534740,HORVU.MOREX.r2.2HG0178910,HORVU.MOREX.r2.2HG0178800,HORVU.MOREX.r2.2HG0179230	HORVU.MOREX.r2.5HG0411600,HORVU.MOREX.r2.2HG0147880,HORVU.MOREX.r2.1HG0052160,HORVU.MOREX.r2.2HG0147700,HORVU.MOREX.r2.1HG0039600,HORVU.MOREX.r2.7HG0535160	HORVU.MOREX.r2.7HG0547990,HORVU.MOREX.r2.6HG0514130,HORVU.MOREX.r2.2HG0147880,HORVU.MOREX.r2.1HG0052160,HORVU.MOREX.r2.7HG0620300,HORVU.MOREX.r2.4HG0284370,HORVU.MOREX.r2.2HG0147700,HORVU.MOREX.r2.4HG0282910,HORVU.MOREX.r2.1HG0039600,HORVU.MOREX.r2.7HG0579160,HORVU.MOREX.r2.3HG0256400,HORVU.MOREX.r2.5HG0401960,HORVU.MOREX.r2.4HG0278420,HORVU.MOREX.r2.4HG0278630,HORVU.MOREX.r2.5HG0423130,HORVU.MOR…	0.0749755	0.457022	0.126429
103	25	45	21	3	HORVU.MOREX.r2.5HG0434780,HORVU.MOREX.r2.2HG0178910,HORVU.MOREX.r2.5HG0434680,HORVU.MOREX.r2.5HG0433720,HORVU.MOREX.r2.5HG0434270,HORVU.MOREX.r2.5HG0434470,HORVU.MOREX.r2.5HG0434130,HORVU.MOREX.r2.4HG0343120,HORVU.MOREX.r2.2HG0179230,HORVU.MOREX.r2.5HG0434820,HORVU.MOREX.r2.5HG0434250,HORVU.MOREX.r2.4HG0343600,HORVU.MOREX.r2.5HG0435040,HORVU.MOREX.r2.5HG0434260,HORVU.MOREX.r2.5HG0434100,HORVU.MOR…	HORVU.MOREX.r2.5HG0434160,HORVU.MOREX.r2.4HG0342540,HORVU.MOREX.r2.7HG0594080	HORVU.MOREX.r2.4HG0285330,HORVU.MOREX.r2.1HG0077910,HORVU.MOREX.r2.6HG0481070,HORVU.MOREX.r2.7HG0595190,HORVU.MOREX.r2.6HG0480120,HORVU.MOREX.r2.5HG0429550,HORVU.MOREX.r2.3HG0222430,HORVU.MOREX.r2.2HG0180010,HORVU.MOREX.r2.4HG0297450,HORVU.MOREX.r2.5HG0434160,HORVU.MOREX.r2.4HG0342540,HORVU.MOREX.r2.4HG0277180,HORVU.MOREX.r2.1HG0015140,HORVU.MOREX.r2.1HG0049810,HORVU.MOREX.r2.3HG0223660,HORVU.MOR…	0.0757235	0.332524	0.126451
104	32	52	24	14	HORVU.MOREX.r2.7HG0589750,HORVU.MOREX.r2.6HG0497600,HORVU.MOREX.r2.2HG0178800,HORVU.MOREX.r2.7HG0591580,HORVU.MOREX.r2.2HG0179230,HORVU.MOREX.r2.2HG0143420,HORVU.MOREX.r2.6HG0497740,HORVU.MOREX.r2.2HG0178910,HORVU.MOREX.r2.7HG0591410,HORVU.MOREX.r2.7HG0590580,HORVU.MOREX.r2.5HG0385900,HORVU.MOREX.r2.7HG0590460,HORVU.MOREX.r2.7HG0585580,HORVU.MOREX.r2.6HG0519800,HORVU.MOREX.r2.7HG0591940,HORVU.MOR…	HORVU.MOREX.r2.5HG0368330,HORVU.MOREX.r2.5HG0386850,HORVU.MOREX.r2.6HG0502510,HORVU.MOREX.r2.4HG0319700,HORVU.MOREX.r2.7HG0569130,HORVU.MOREX.r2.2HG0143620,HORVU.MOREX.r2.5HG0386860,HORVU.MOREX.r2.2HG0096870,HORVU.MOREX.r2.5HG0380850,HORVU.MOREX.r2.5HG0366870,HORVU.MOREX.r2.2HG0079830,HORVU.MOREX.r2.1HG0046390,HORVU.MOREX.r2.5HG0368480,HORVU.MOREX.r2.5HG0385480	HORVU.MOREX.r2.1HG0041900,HORVU.MOREX.r2.5HG0386860,HORVU.MOREX.r2.2HG0096870,HORVU.MOREX.r2.5HG0380850,HORVU.MOREX.r2.1HG0015010,HORVU.MOREX.r2.5HG0368330,HORVU.MOREX.r2.7HG0569130,HORVU.MOREX.r2.2HG0143620,HORVU.MOREX.r2.5HG0368480,HORVU.MOREX.r2.2HG0102880,HORVU.MOREX.r2.4HG0304810,HORVU.MOREX.r2.5HG0385480,HORVU.MOREX.r2.5HG0386850,HORVU.MOREX.r2.5HG0389880,HORVU.MOREX.r2.7HG0587860,HORVU.MOR…	0.0784725	1.90608	0.129781
105	26	98	12	12	HORVU.MOREX.r2.4HG0320500,HORVU.MOREX.r2.5HG0426980,HORVU.MOREX.r2.5HG0426020,HORVU.MOREX.r2.5HG0427220,HORVU.MOREX.r2.5HG0426840,HORVU.MOREX.r2.5HG0425970,HORVU.MOREX.r2.5HG0426050,HORVU.MOREX.r2.5HG0426480,HORVU.MOREX.r2.5HG0426940,HORVU.MOREX.r2.5HG0426270,HORVU.MOREX.r2.5HG0426010,HORVU.MOREX.r2.5HG0427700	HORVU.MOREX.r2.5HG0425020,HORVU.MOREX.r2.5HG0426280,HORVU.MOREX.r2.5HG0426110,HORVU.MOREX.r2.5HG0426180,HORVU.MOREX.r2.5HG0426910,HORVU.MOREX.r2.5HG0423990,HORVU.MOREX.r2.5HG0425710,HORVU.MOREX.r2.5HG0425740,HORVU.MOREX.r2.5HG0426960,HORVU.MOREX.r2.5HG0424190,HORVU.MOREX.r2.5HG0423850,HORVU.MOREX.r2.5HG0427020	HORVU.MOREX.r2.6HG0517950,HORVU.MOREX.r2.5HG0425020,HORVU.MOREX.r2.7HG0560200,HORVU.MOREX.r2.5HG0426110,HORVU.MOREX.r2.5HG0424190,HORVU.MOREX.r2.5HG0423990,HORVU.MOREX.r2.5HG0426910,HORVU.MOREX.r2.5HG0426180,HORVU.MOREX.r2.5HG0425710,HORVU.MOREX.r2.5HG0425740,HORVU.MOREX.r2.5HG0426960,HORVU.MOREX.r2.5HG0426280,HORVU.MOREX.r2.5HG0423850,HORVU.MOREX.r2.5HG0427020	0.0802006	2.10027	0.131376
106	42	100	37	7	HORVU.MOREX.r2.5HG0384030,HORVU.MOREX.r2.5HG0384050,HORVU.MOREX.r2.5HG0374410,HORVU.MOREX.r2.5HG0366280,HORVU.MOREX.r2.2HG0178800,HORVU.MOREX.r2.5HG0375540,HORVU.MOREX.r2.2HG0179230,HORVU.MOREX.r2.5HG0381870,HORVU.MOREX.r2.5HG0381090,HORVU.MOREX.r2.5HG0382660,HORVU.MOREX.r2.5HG0384070,HORVU.MOREX.r2.2HG0178910,HORVU.MOREX.r2.5HG0384340,HORVU.MOREX.r2.5HG0368540,HORVU.MOREX.r2.5HG0379510,HORVU.MOR…	HORVU.MOREX.r2.5HG0422830,HORVU.MOREX.r2.4HG0331210,HORVU.MOREX.r2.4HG0315180,HORVU.MOREX.r2.5HG0377220,HORVU.MOREX.r2.7HG0560150,HORVU.MOREX.r2.7HG0579040,HORVU.MOREX.r2.4HG0279480	HORVU.MOREX.r2.2HG0098960,HORVU.MOREX.r2.5HG0360130,HORVU.MOREX.r2.7HG0552850,HORVU.MOREX.r2.3HG0225410,HORVU.MOREX.r2.2HG0091750,HORVU.MOREX.r2.4HG0331210,HORVU.MOREX.r2.4HG0309920,HORVU.MOREX.r2.2HG0128840,HORVU.MOREX.r2.1HG0025000,HORVU.MOREX.r2.5HG0425760,HORVU.MOREX.r2.4HG0315180,HORVU.MOREX.r2.4HG0304030,HORVU.MOREX.r2.7HG0560150,HORVU.MOREX.r2.7HG0532050,HORVU.MOREX.r2.5HG0422830,HORVU.MOR…	0.0882553	0.487446	0.143207
107	24	44	6	3	HORVU.MOREX.r2.2HG0180770,HORVU.MOREX.r2.2HG0178910,HORVU.MOREX.r2.7HG0541620,HORVU.MOREX.r2.2HG0178800,HORVU.MOREX.r2.2HG0179230,HORVU.MOREX.r2.2HG0181050	HORVU.MOREX.r2.7HG0541240,HORVU.MOREX.r2.2HG0175370,HORVU.MOREX.r2.2HG0135950	HORVU.MOREX.r2.2HG0135950,HORVU.MOREX.r2.6HG0460860,HORVU.MOREX.r2.3HG0258120,HORVU.MOREX.r2.2HG0175370,HORVU.MOREX.r2.4HG0327490,HORVU.MOREX.r2.1HG0050540,HORVU.MOREX.r2.5HG0441690,HORVU.MOREX.r2.2HG0108030,HORVU.MOREX.r2.7HG0541240,HORVU.MOREX.r2.2HG0082480,HORVU.MOREX.r2.7HG0562070,HORVU.MOREX.r2.3HG0237260,HORVU.MOREX.r2.3HG0255750,HORVU.MOREX.r2.1HG0018510,HORVU.MOREX.r2.2HG0134470,HORVU.MOR…	0.111712	0.348414	0.179575
108	84	960	34	31	HORVU.MOREX.r2.5HG0384030,HORVU.MOREX.r2.5HG0384050,HORVU.MOREX.r2.5HG0374410,HORVU.MOREX.r2.5HG0366280,HORVU.MOREX.r2.5HG0375540,HORVU.MOREX.r2.5HG0381870,HORVU.MOREX.r2.5HG0381090,HORVU.MOREX.r2.5HG0382660,HORVU.MOREX.r2.5HG0384070,HORVU.MOREX.r2.5HG0361810,HORVU.MOREX.r2.7HG0534740,HORVU.MOREX.r2.5HG0384340,HORVU.MOREX.r2.5HG0368540,HORVU.MOREX.r2.5HG0379510,HORVU.MOREX.r2.5HG0375570,HORVU.MOR…	HORVU.MOREX.r2.5HG0370720,HORVU.MOREX.r2.6HG0467200,HORVU.MOREX.r2.5HG0373950,HORVU.MOREX.r2.5HG0376480,HORVU.MOREX.r2.5HG0375480,HORVU.MOREX.r2.7HG0535010,HORVU.MOREX.r2.5HG0370850,HORVU.MOREX.r2.5HG0379850,HORVU.MOREX.r2.5HG0376770,HORVU.MOREX.r2.5HG0377220,HORVU.MOREX.r2.1HG0011100,HORVU.MOREX.r2.5HG0382340,HORVU.MOREX.r2.5HG0368350,HORVU.MOREX.r2.5HG0377440,HORVU.MOREX.r2.5HG0363820,HORVU.MOR…	HORVU.MOREX.r2.4HG0281710,HORVU.MOREX.r2.1HG0011100,HORVU.MOREX.r2.6HG0467200,HORVU.MOREX.r2.5HG0373950,HORVU.MOREX.r2.5HG0407520,HORVU.MOREX.r2.5HG0376480,HORVU.MOREX.r2.5HG0375480,HORVU.MOREX.r2.7HG0598400,HORVU.MOREX.r2.7HG0535010,HORVU.MOREX.r2.5HG0370850,HORVU.MOREX.r2.5HG0379850,HORVU.MOREX.r2.5HG0376770,HORVU.MOREX.r2.5HG0377220,HORVU.MOREX.r2.5HG0419720,HORVU.MOREX.r2.5HG0382340,HORVU.MOR…	0.116789	1.43496	0.185998
109	40	70	11	7	HORVU.MOREX.r2.4HG0343600,HORVU.MOREX.r2.4HG0342570,HORVU.MOREX.r2.2HG0178910,HORVU.MOREX.r2.2HG0176000,HORVU.MOREX.r2.2HG0176780,HORVU.MOREX.r2.2HG0175600,HORVU.MOREX.r2.2HG0114200,HORVU.MOREX.r2.5HG0410690,HORVU.MOREX.r2.4HG0343120,HORVU.MOREX.r2.2HG0179230,HORVU.MOREX.r2.2HG0178800	HORVU.MOREX.r2.7HG0601460,HORVU.MOREX.r2.2HG0126140,HORVU.MOREX.r2.5HG0412550,HORVU.MOREX.r2.4HG0341470,HORVU.MOREX.r2.4HG0342540,HORVU.MOREX.r2.7HG0580730,HORVU.MOREX.r2.6HG0510460	HORVU.MOREX.r2.3HG0221890,HORVU.MOREX.r2.2HG0148770,HORVU.MOREX.r2.3HG0236180,HORVU.MOREX.r2.1HG0025600,HORVU.MOREX.r2.3HG0267250,HORVU.MOREX.r2.7HG0570080,HORVU.MOREX.r2.6HG0490130,HORVU.MOREX.r2.7HG0589470,HORVU.MOREX.r2.4HG0319220,HORVU.MOREX.r2.4HG0281530,HORVU.MOREX.r2.1HG0078260,HORVU.MOREX.r2.7HG0601460,HORVU.MOREX.r2.4HG0341470,HORVU.MOREX.r2.4HG0342540,HORVU.MOREX.r2.7HG0597090,HORVU.MOR…	0.118224	0.517155	0.186555
110	44	27	7	8	HORVU.MOREX.r2.7HG0603380,HORVU.MOREX.r2.2HG0178910,HORVU.MOREX.r2.6HG0514530,HORVU.MOREX.r2.7HG0539070,HORVU.MOREX.r2.2HG0178800,HORVU.MOREX.r2.3HG0244480,HORVU.MOREX.r2.2HG0179230	HORVU.MOREX.r2.6HG0515210,HORVU.MOREX.r2.7HG0604090,HORVU.MOREX.r2.7HG0603160,HORVU.MOREX.r2.6HG0514710,HORVU.MOREX.r2.6HG0514480,HORVU.MOREX.r2.6HG0494000,HORVU.MOREX.r2.7HG0540000,HORVU.MOREX.r2.3HG0244690	HORVU.MOREX.r2.7HG0614070,HORVU.MOREX.r2.6HG0458420,HORVU.MOREX.r2.4HG0336410,HORVU.MOREX.r2.7HG0604090,HORVU.MOREX.r2.6HG0494000,HORVU.MOREX.r2.7HG0540000,HORVU.MOREX.r2.3HG0225190,HORVU.MOREX.r2.7HG0603160,HORVU.MOREX.r2.3HG0271670,HORVU.MOREX.r2.6HG0514480,HORVU.MOREX.r2.2HG0147100,HORVU.MOREX.r2.3HG0196450,HORVU.MOREX.r2.6HG0455170,HORVU.MOREX.r2.7HG0572050,HORVU.MOREX.r2.3HG0211020,HORVU.MOR…	0.133979	0.541732	0.209495
111	81	1823	61	17	HORVU.MOREX.r2.5HG0418880,HORVU.MOREX.r2.4HG0326250,HORVU.MOREX.r2.1HG0058540,HORVU.MOREX.r2.6HG0455770,HORVU.MOREX.r2.6HG0455430,HORVU.MOREX.r2.5HG0417610,HORVU.MOREX.r2.1HG0060260,HORVU.MOREX.r2.7HG0565310,HORVU.MOREX.r2.6HG0501240,HORVU.MOREX.r2.1HG0018750,HORVU.MOREX.r2.1HG0059020,HORVU.MOREX.r2.1HG0058190,HORVU.MOREX.r2.2HG0157590,HORVU.MOREX.r2.7HG0557470,HORVU.MOREX.r2.2HG0153610,HORVU.MOR…	HORVU.MOREX.r2.5HG0419280,HORVU.MOREX.r2.5HG0417140,HORVU.MOREX.r2.2HG0153690,HORVU.MOREX.r2.7HG0560380,HORVU.MOREX.r2.7HG0560540,HORVU.MOREX.r2.7HG0556400,HORVU.MOREX.r2.5HG0419500,HORVU.MOREX.r2.7HG0557830,HORVU.MOREX.r2.7HG0557890,HORVU.MOREX.r2.5HG0419470,HORVU.MOREX.r2.7HG0559630,HORVU.MOREX.r2.7HG0560290,HORVU.MOREX.r2.2HG0154300,HORVU.MOREX.r2.2HG0153520,HORVU.MOREX.r2.7HG0556600,HORVU.MOR…	HORVU.MOREX.r2.5HG0419280,HORVU.MOREX.r2.5HG0417140,HORVU.MOREX.r2.2HG0153690,HORVU.MOREX.r2.7HG0560380,HORVU.MOREX.r2.7HG0560540,HORVU.MOREX.r2.7HG0556400,HORVU.MOREX.r2.5HG0419500,HORVU.MOREX.r2.7HG0557830,HORVU.MOREX.r2.7HG0557890,HORVU.MOREX.r2.5HG0419470,HORVU.MOREX.r2.7HG0559630,HORVU.MOREX.r2.7HG0560290,HORVU.MOREX.r2.2HG0154300,HORVU.MOREX.r2.2HG0153520,HORVU.MOREX.r2.7HG0556600,HORVU.MOR…	0.13915	0.646903	0.215619
112	95	255	19	21	HORVU.MOREX.r2.2HG0180770,HORVU.MOREX.r2.5HG0408830,HORVU.MOREX.r2.3HG0182940,HORVU.MOREX.r2.3HG0246360,HORVU.MOREX.r2.1HG0078740,HORVU.MOREX.r2.6HG0503820,HORVU.MOREX.r2.2HG0178910,HORVU.MOREX.r2.1HG0052630,HORVU.MOREX.r2.5HG0390630,HORVU.MOREX.r2.6HG0465250,HORVU.MOREX.r2.1HG0052210,HORVU.MOREX.r2.3HG0246100,HORVU.MOREX.r2.2HG0178800,HORVU.MOREX.r2.1HG0052770,HORVU.MOREX.r2.3HG0183050,HORVU.MOR…	HORVU.MOREX.r2.5HG0422830,HORVU.MOREX.r2.4HG0336030,HORVU.MOREX.r2.6HG0467950,HORVU.MOREX.r2.6HG0505390,HORVU.MOREX.r2.3HG0246160,HORVU.MOREX.r2.6HG0503730,HORVU.MOREX.r2.3HG0181650,HORVU.MOREX.r2.7HG0529030,HORVU.MOREX.r2.1HG0071020,HORVU.MOREX.r2.5HG0409430,HORVU.MOREX.r2.3HG0245280,HORVU.MOREX.r2.1HG0053170,HORVU.MOREX.r2.6HG0503680,HORVU.MOREX.r2.5HG0364690,HORVU.MOREX.r2.5HG0392170,HORVU.MOR…	HORVU.MOREX.r2.5HG0360110,HORVU.MOREX.r2.1HG0044190,HORVU.MOREX.r2.5HG0392170,HORVU.MOREX.r2.5HG0360130,HORVU.MOREX.r2.3HG0251490,HORVU.MOREX.r2.5HG0435380,HORVU.MOREX.r2.2HG0157350,HORVU.MOREX.r2.3HG0250890,HORVU.MOREX.r2.6HG0503680,HORVU.MOREX.r2.7HG0605160,HORVU.MOREX.r2.6HG0503070,HORVU.MOREX.r2.6HG0450210,HORVU.MOREX.r2.2HG0161970,HORVU.MOREX.r2.6HG0497440,HORVU.MOREX.r2.1HG0056760,HORVU.MOR…	0.141145	0.691098	0.216758
113	48	60	21	9	HORVU.MOREX.r2.5HG0392190,HORVU.MOREX.r2.2HG0180770,HORVU.MOREX.r2.5HG0424830,HORVU.MOREX.r2.5HG0425570,HORVU.MOREX.r2.5HG0424740,HORVU.MOREX.r2.5HG0423680,HORVU.MOREX.r2.5HG0424570,HORVU.MOREX.r2.2HG0178910,HORVU.MOREX.r2.5HG0424020,HORVU.MOREX.r2.3HG0203410,HORVU.MOREX.r2.5HG0424260,HORVU.MOREX.r2.1HG0058820,HORVU.MOREX.r2.5HG0424820,HORVU.MOREX.r2.2HG0178800,HORVU.MOREX.r2.5HG0424900,HORVU.MOR…	HORVU.MOREX.r2.5HG0381700,HORVU.MOREX.r2.1HG0058960,HORVU.MOREX.r2.2HG0125150,HORVU.MOREX.r2.2HG0156230,HORVU.MOREX.r2.3HG0231570,HORVU.MOREX.r2.2HG0121090,HORVU.MOREX.r2.5HG0424310,HORVU.MOREX.r2.1HG0060860,HORVU.MOREX.r2.1HG0061200	HORVU.MOREX.r2.5HG0446800,HORVU.MOREX.r2.5HG0438450,HORVU.MOREX.r2.7HG0613240,HORVU.MOREX.r2.2HG0156230,HORVU.MOREX.r2.3HG0231450,HORVU.MOREX.r2.3HG0231570,HORVU.MOREX.r2.2HG0111080,HORVU.MOREX.r2.1HG0063830,HORVU.MOREX.r2.5HG0425610,HORVU.MOREX.r2.5HG0381700,HORVU.MOREX.r2.6HG0491430,HORVU.MOREX.r2.7HG0585920,HORVU.MOREX.r2.5HG0440780,HORVU.MOREX.r2.5HG0424310,HORVU.MOREX.r2.1HG0020280,HORVU.MOR…	0.150129	0.562517	0.228516
114	38	218	26	15	HORVU.MOREX.r2.5HG0433720,HORVU.MOREX.r2.5HG0434780,HORVU.MOREX.r2.5HG0434130,HORVU.MOREX.r2.5HG0434820,HORVU.MOREX.r2.5HG0435040,HORVU.MOREX.r2.2HG0178800,HORVU.MOREX.r2.2HG0179230,HORVU.MOREX.r2.5HG0436100,HORVU.MOREX.r2.5HG0434680,HORVU.MOREX.r2.5HG0435910,HORVU.MOREX.r2.2HG0178910,HORVU.MOREX.r2.5HG0436080,HORVU.MOREX.r2.5HG0435890,HORVU.MOREX.r2.5HG0434150,HORVU.MOREX.r2.5HG0436630,HORVU.MOR…	HORVU.MOREX.r2.5HG0435220,HORVU.MOREX.r2.6HG0470600,HORVU.MOREX.r2.5HG0434810,HORVU.MOREX.r2.5HG0436120,HORVU.MOREX.r2.5HG0436190,HORVU.MOREX.r2.5HG0434860,HORVU.MOREX.r2.5HG0436340,HORVU.MOREX.r2.5HG0438750,HORVU.MOREX.r2.5HG0434830,HORVU.MOREX.r2.2HG0100180,HORVU.MOREX.r2.UnG0633100,HORVU.MOREX.r2.5HG0423360,HORVU.MOREX.r2.5HG0436200,HORVU.MOREX.r2.5HG0435460,HORVU.MOREX.r2.5HG0433890	HORVU.MOREX.r2.5HG0435220,HORVU.MOREX.r2.6HG0470600,HORVU.MOREX.r2.5HG0434810,HORVU.MOREX.r2.5HG0436120,HORVU.MOREX.r2.7HG0618510,HORVU.MOREX.r2.5HG0434860,HORVU.MOREX.r2.5HG0436340,HORVU.MOREX.r2.5HG0438750,HORVU.MOREX.r2.5HG0434830,HORVU.MOREX.r2.2HG0100180,HORVU.MOREX.r2.3HG0191720,HORVU.MOREX.r2.UnG0633100,HORVU.MOREX.r2.5HG0423360,HORVU.MOREX.r2.5HG0436200,HORVU.MOREX.r2.5HG0435460,HORVU.MOR…	0.155701	1.59761	0.233147
115	21	60	6	3	HORVU.MOREX.r2.2HG0178910,HORVU.MOREX.r2.2HG0176000,HORVU.MOREX.r2.2HG0175600,HORVU.MOREX.r2.2HG0178800,HORVU.MOREX.r2.2HG0176780,HORVU.MOREX.r2.2HG0179230	HORVU.MOREX.r2.7HG0527010,HORVU.MOREX.r2.4HG0329480,HORVU.MOREX.r2.3HG0230390	HORVU.MOREX.r2.6HG0521190,HORVU.MOREX.r2.3HG0214120,HORVU.MOREX.r2.3HG0230390,HORVU.MOREX.r2.1HG0075160,HORVU.MOREX.r2.3HG0209460,HORVU.MOREX.r2.3HG0188200,HORVU.MOREX.r2.4HG0329480,HORVU.MOREX.r2.7HG0527010,HORVU.MOREX.r2.7HG0602250,HORVU.MOREX.r2.1HG0053180,HORVU.MOREX.r2.7HG0619830	0.155883	0.40668	0.233147
116	37	35	21	7	HORVU.MOREX.r2.5HG0436030,HORVU.MOREX.r2.2HG0085320,HORVU.MOREX.r2.2HG0085130,HORVU.MOREX.r2.6HG0463100,HORVU.MOREX.r2.2HG0085770,HORVU.MOREX.r2.5HG0436230,HORVU.MOREX.r2.5HG0435820,HORVU.MOREX.r2.2HG0085930,HORVU.MOREX.r2.2HG0178910,HORVU.MOREX.r2.2HG0084620,HORVU.MOREX.r2.5HG0349820,HORVU.MOREX.r2.2HG0085190,HORVU.MOREX.r2.5HG0436080,HORVU.MOREX.r2.2HG0178800,HORVU.MOREX.r2.5HG0435890,HORVU.MOR…	HORVU.MOREX.r2.6HG0470600,HORVU.MOREX.r2.6HG0463090,HORVU.MOREX.r2.2HG0086020,HORVU.MOREX.r2.5HG0436120,HORVU.MOREX.r2.5HG0349630,HORVU.MOREX.r2.2HG0085980,HORVU.MOREX.r2.2HG0086010	HORVU.MOREX.r2.3HG0252790,HORVU.MOREX.r2.5HG0426350,HORVU.MOREX.r2.2HG0086020,HORVU.MOREX.r2.2HG0132020,HORVU.MOREX.r2.1HG0068540,HORVU.MOREX.r2.4HG0327900,HORVU.MOREX.r2.2HG0164620,HORVU.MOREX.r2.2HG0085980,HORVU.MOREX.r2.3HG0248040,HORVU.MOREX.r2.5HG0440740,HORVU.MOREX.r2.1HG0015850,HORVU.MOREX.r2.5HG0436120,HORVU.MOREX.r2.3HG0256310,HORVU.MOREX.r2.5HG0396700,HORVU.MOREX.r2.6HG0519020,HORVU.MOR…	0.2061	0.569146	0.305597
117	28	71	4	5	HORVU.MOREX.r2.2HG0176780,HORVU.MOREX.r2.2HG0175600,HORVU.MOREX.r2.2HG0114200,HORVU.MOREX.r2.2HG0176000	HORVU.MOREX.r2.2HG0114700,HORVU.MOREX.r2.2HG0124890,HORVU.MOREX.r2.2HG0116950,HORVU.MOREX.r2.2HG0116720,HORVU.MOREX.r2.7HG0566300	HORVU.MOREX.r2.7HG0604070,HORVU.MOREX.r2.2HG0116950,HORVU.MOREX.r2.2HG0114700,HORVU.MOREX.r2.3HG0232920,HORVU.MOREX.r2.5HG0410830,HORVU.MOREX.r2.1HG0069340,HORVU.MOREX.r2.1HG0056570,HORVU.MOREX.r2.6HG0464630,HORVU.MOREX.r2.4HG0343780,HORVU.MOREX.r2.5HG0367340,HORVU.MOREX.r2.7HG0566300,HORVU.MOREX.r2.7HG0531720,HORVU.MOREX.r2.4HG0295720,HORVU.MOREX.r2.1HG0034750,HORVU.MOREX.r2.1HG0046830,HORVU.MOR…	0.217759	0.530442	0.312457
118	29	64	4	5	HORVU.MOREX.r2.7HG0549450,HORVU.MOREX.r2.2HG0178910,HORVU.MOREX.r2.2HG0178800,HORVU.MOREX.r2.2HG0179230	HORVU.MOREX.r2.7HG0596060,HORVU.MOREX.r2.7HG0549470,HORVU.MOREX.r2.5HG0395280,HORVU.MOREX.r2.4HG0331160,HORVU.MOREX.r2.3HG0240960	HORVU.MOREX.r2.5HG0395280,HORVU.MOREX.r2.3HG0240960,HORVU.MOREX.r2.1HG0060180,HORVU.MOREX.r2.6HG0486870,HORVU.MOREX.r2.5HG0399340,HORVU.MOREX.r2.3HG0251160,HORVU.MOREX.r2.4HG0286970,HORVU.MOREX.r2.7HG0596060,HORVU.MOREX.r2.1HG0046730,HORVU.MOREX.r2.2HG0143400,HORVU.MOREX.r2.2HG0114090,HORVU.MOREX.r2.7HG0552150,HORVU.MOREX.r2.4HG0331160,HORVU.MOREX.r2.6HG0506660,HORVU.MOREX.r2.1HG0052870,HORVU.MOR…	0.218275	0.508258	0.312457
119	20	18	6	3	HORVU.MOREX.r2.2HG0178910,HORVU.MOREX.r2.2HG0176000,HORVU.MOREX.r2.2HG0175600,HORVU.MOREX.r2.2HG0178800,HORVU.MOREX.r2.2HG0176780,HORVU.MOREX.r2.2HG0179230	HORVU.MOREX.r2.5HG0427860,HORVU.MOREX.r2.6HG0506450,HORVU.MOREX.r2.1HG0001540	HORVU.MOREX.r2.7HG0562470,HORVU.MOREX.r2.5HG0416300,HORVU.MOREX.r2.3HG0238830,HORVU.MOREX.r2.2HG0165100,HORVU.MOREX.r2.2HG0167330,HORVU.MOREX.r2.5HG0427860,HORVU.MOREX.r2.6HG0506450,HORVU.MOREX.r2.1HG0062080,HORVU.MOREX.r2.4HG0319670,HORVU.MOREX.r2.1HG0045810,HORVU.MOREX.r2.5HG0402460,HORVU.MOREX.r2.4HG0307490,HORVU.MOREX.r2.5HG0426070,HORVU.MOREX.r2.1HG0060840,HORVU.MOREX.r2.1HG0001540,HORVU.MOR…	0.21981	0.430671	0.312457
120	20	12	10	3	HORVU.MOREX.r2.5HG0421380,HORVU.MOREX.r2.2HG0178910,HORVU.MOREX.r2.5HG0421500,HORVU.MOREX.r2.5HG0421160,HORVU.MOREX.r2.2HG0179230,HORVU.MOREX.r2.2HG0178800,HORVU.MOREX.r2.5HG0421300,HORVU.MOREX.r2.5HG0420850,HORVU.MOREX.r2.5HG0420400,HORVU.MOREX.r2.5HG0421460	HORVU.MOREX.r2.5HG0420070,HORVU.MOREX.r2.4HG0283000,HORVU.MOREX.r2.5HG0412650	HORVU.MOREX.r2.6HG0477020,HORVU.MOREX.r2.7HG0607180,HORVU.MOREX.r2.5HG0412650,HORVU.MOREX.r2.2HG0177350,HORVU.MOREX.r2.1HG0023660,HORVU.MOREX.r2.5HG0420070,HORVU.MOREX.r2.7HG0553980,HORVU.MOREX.r2.7HG0551720,HORVU.MOREX.r2.2HG0113680,HORVU.MOREX.r2.7HG0567320,HORVU.MOREX.r2.4HG0283000,HORVU.MOREX.r2.5HG0352410,HORVU.MOREX.r2.7HG0600880,HORVU.MOREX.r2.7HG0612140,HORVU.MOREX.r2.5HG0399620,HORVU.MOR…	0.21981	0.430671	0.312457
121	20	108	6	3	HORVU.MOREX.r2.2HG0109440,HORVU.MOREX.r2.2HG0178910,HORVU.MOREX.r2.2HG0178800,HORVU.MOREX.r2.2HG0110620,HORVU.MOREX.r2.2HG0110160,HORVU.MOREX.r2.2HG0179230	HORVU.MOREX.r2.6HG0494390,HORVU.MOREX.r2.2HG0109070,HORVU.MOREX.r2.2HG0107450	HORVU.MOREX.r2.3HG0185770,HORVU.MOREX.r2.6HG0494390,HORVU.MOREX.r2.1HG0018440,HORVU.MOREX.r2.2HG0107450,HORVU.MOREX.r2.1HG0070690,HORVU.MOREX.r2.2HG0109070,HORVU.MOREX.r2.6HG0494420,HORVU.MOREX.r2.6HG0494410	0.21981	0.430671	0.312457
122	41	90	18	8	HORVU.MOREX.r2.5HG0421160,HORVU.MOREX.r2.5HG0421380,HORVU.MOREX.r2.7HG0604610,HORVU.MOREX.r2.7HG0604570,HORVU.MOREX.r2.7HG0602090,HORVU.MOREX.r2.7HG0602080,HORVU.MOREX.r2.5HG0421500,HORVU.MOREX.r2.7HG0602630,HORVU.MOREX.r2.7HG0602710,HORVU.MOREX.r2.2HG0176000,HORVU.MOREX.r2.2HG0175600,HORVU.MOREX.r2.2HG0167340,HORVU.MOREX.r2.2HG0176780,HORVU.MOREX.r2.5HG0421300,HORVU.MOREX.r2.7HG0604520,HORVU.MOR…	HORVU.MOREX.r2.2HG0169270,HORVU.MOREX.r2.7HG0602740,HORVU.MOREX.r2.7HG0602390,HORVU.MOREX.r2.7HG0602910,HORVU.MOREX.r2.5HG0421440,HORVU.MOREX.r2.7HG0604680,HORVU.MOREX.r2.3HG0244050,HORVU.MOREX.r2.7HG0604220	HORVU.MOREX.r2.4HG0280520,HORVU.MOREX.r2.6HG0498140,HORVU.MOREX.r2.1HG0059100,HORVU.MOREX.r2.4HG0289480,HORVU.MOREX.r2.3HG0258410,HORVU.MOREX.r2.1HG0006150,HORVU.MOREX.r2.2HG0155740,HORVU.MOREX.r2.6HG0499840,HORVU.MOREX.r2.7HG0604220,HORVU.MOREX.r2.3HG0244050,HORVU.MOREX.r2.6HG0503490,HORVU.MOREX.r2.7HG0602390,HORVU.MOREX.r2.2HG0152570,HORVU.MOREX.r2.5HG0383170,HORVU.MOREX.r2.5HG0421440,HORVU.MOR…	0.227198	0.591267	0.317457
123	41	76	6	8	HORVU.MOREX.r2.7HG0558940,HORVU.MOREX.r2.2HG0178910,HORVU.MOREX.r2.5HG0404560,HORVU.MOREX.r2.2HG0178800,HORVU.MOREX.r2.2HG0179230,HORVU.MOREX.r2.3HG0254820	HORVU.MOREX.r2.7HG0583650,HORVU.MOREX.r2.6HG0483020,HORVU.MOREX.r2.4HG0343940,HORVU.MOREX.r2.3HG0254350,HORVU.MOREX.r2.3HG0254340,HORVU.MOREX.r2.7HG0557120,HORVU.MOREX.r2.5HG0404510,HORVU.MOREX.r2.4HG0291020	HORVU.MOREX.r2.7HG0583650,HORVU.MOREX.r2.6HG0483020,HORVU.MOREX.r2.3HG0273760,HORVU.MOREX.r2.5HG0394830,HORVU.MOREX.r2.6HG0490460,HORVU.MOREX.r2.1HG0066370,HORVU.MOREX.r2.4HG0285910,HORVU.MOREX.r2.3HG0254340,HORVU.MOREX.r2.6HG0490260,HORVU.MOREX.r2.6HG0507460,HORVU.MOREX.r2.5HG0367300,HORVU.MOREX.r2.4HG0343940,HORVU.MOREX.r2.1HG0049100,HORVU.MOREX.r2.4HG0291020,HORVU.MOREX.r2.3HG0264090,HORVU.MOR…	0.227198	0.591267	0.317457
124	68	357	24	15	HORVU.MOREX.r2.3HG0210420,HORVU.MOREX.r2.3HG0209860,HORVU.MOREX.r2.3HG0225790,HORVU.MOREX.r2.3HG0209090,HORVU.MOREX.r2.2HG0178800,HORVU.MOREX.r2.3HG0233470,HORVU.MOREX.r2.2HG0179230,HORVU.MOREX.r2.3HG0232450,HORVU.MOREX.r2.2HG0143420,HORVU.MOREX.r2.3HG0229390,HORVU.MOREX.r2.2HG0178910,HORVU.MOREX.r2.3HG0226630,HORVU.MOREX.r2.3HG0232840,HORVU.MOREX.r2.3HG0210560,HORVU.MOREX.r2.3HG0232290,HORVU.MOR…	HORVU.MOREX.r2.3HG0225060,HORVU.MOREX.r2.3HG0233980,HORVU.MOREX.r2.2HG0144040,HORVU.MOREX.r2.3HG0222920,HORVU.MOREX.r2.3HG0227920,HORVU.MOREX.r2.4HG0288780,HORVU.MOREX.r2.3HG0230660,HORVU.MOREX.r2.3HG0230780,HORVU.MOREX.r2.3HG0233380,HORVU.MOREX.r2.3HG0207730,HORVU.MOREX.r2.3HG0230170,HORVU.MOREX.r2.3HG0224000,HORVU.MOREX.r2.3HG0231470,HORVU.MOREX.r2.3HG0209210,HORVU.MOREX.r2.3HG0226270	HORVU.MOREX.r2.4HG0326110,HORVU.MOREX.r2.3HG0209210,HORVU.MOREX.r2.1HG0044600,HORVU.MOREX.r2.3HG0230660,HORVU.MOREX.r2.3HG0230780,HORVU.MOREX.r2.3HG0207730,HORVU.MOREX.r2.5HG0349230,HORVU.MOREX.r2.1HG0020240,HORVU.MOREX.r2.2HG0085310,HORVU.MOREX.r2.3HG0236690,HORVU.MOREX.r2.3HG0195220,HORVU.MOREX.r2.2HG0133690,HORVU.MOREX.r2.4HG0317910,HORVU.MOREX.r2.2HG0173880,HORVU.MOREX.r2.2HG0144040,HORVU.MOR…	0.228865	0.689949	0.317457
125	22	105	10	9	HORVU.MOREX.r2.2HG0180770,HORVU.MOREX.r2.4HG0291490,HORVU.MOREX.r2.4HG0287820,HORVU.MOREX.r2.4HG0290700,HORVU.MOREX.r2.4HG0287760,HORVU.MOREX.r2.4HG0287600,HORVU.MOREX.r2.4HG0288360,HORVU.MOREX.r2.4HG0295370,HORVU.MOREX.r2.4HG0288290,HORVU.MOREX.r2.2HG0181050	HORVU.MOREX.r2.4HG0288500,HORVU.MOREX.r2.4HG0298090,HORVU.MOREX.r2.4HG0289490,HORVU.MOREX.r2.4HG0287830,HORVU.MOREX.r2.4HG0289350,HORVU.MOREX.r2.1HG0076600,HORVU.MOREX.r2.3HG0198650,HORVU.MOREX.r2.4HG0288590,HORVU.MOREX.r2.4HG0287840	HORVU.MOREX.r2.4HG0288500,HORVU.MOREX.r2.6HG0526260,HORVU.MOREX.r2.4HG0298090,HORVU.MOREX.r2.4HG0289490,HORVU.MOREX.r2.4HG0288610,HORVU.MOREX.r2.4HG0287830,HORVU.MOREX.r2.2HG0170070,HORVU.MOREX.r2.4HG0289350,HORVU.MOREX.r2.1HG0076600,HORVU.MOREX.r2.3HG0198650,HORVU.MOREX.r2.4HG0288590,HORVU.MOREX.r2.4HG0287840	0.240978	1.69464	0.329991
126	32	47	12	6	HORVU.MOREX.r2.2HG0180770,HORVU.MOREX.r2.5HG0388620,HORVU.MOREX.r2.5HG0388970,HORVU.MOREX.r2.2HG0178910,HORVU.MOREX.r2.5HG0388740,HORVU.MOREX.r2.5HG0388420,HORVU.MOREX.r2.5HG0387650,HORVU.MOREX.r2.2HG0178800,HORVU.MOREX.r2.3HG0209440,HORVU.MOREX.r2.5HG0387850,HORVU.MOREX.r2.2HG0179230,HORVU.MOREX.r2.2HG0181050	HORVU.MOREX.r2.5HG0388870,HORVU.MOREX.r2.6HG0509770,HORVU.MOREX.r2.3HG0243750,HORVU.MOREX.r2.7HG0546220,HORVU.MOREX.r2.4HG0284860,HORVU.MOREX.r2.2HG0148230	HORVU.MOREX.r2.6HG0509770,HORVU.MOREX.r2.4HG0286550,HORVU.MOREX.r2.3HG0243750,HORVU.MOREX.r2.3HG0262260,HORVU.MOREX.r2.4HG0284860,HORVU.MOREX.r2.3HG0236690,HORVU.MOREX.r2.7HG0532460,HORVU.MOREX.r2.3HG0241810,HORVU.MOREX.r2.2HG0148380,HORVU.MOREX.r2.4HG0298620,HORVU.MOREX.r2.2HG0098530,HORVU.MOREX.r2.5HG0388870,HORVU.MOREX.r2.4HG0328930,HORVU.MOREX.r2.5HG0444090,HORVU.MOREX.r2.2HG0138210,HORVU.MOR…	0.243953	0.563033	0.329991
127	32	76	17	6	HORVU.MOREX.r2.1HG0066930,HORVU.MOREX.r2.7HG0553840,HORVU.MOREX.r2.7HG0551080,HORVU.MOREX.r2.1HG0066860,HORVU.MOREX.r2.4HG0315870,HORVU.MOREX.r2.7HG0554850,HORVU.MOREX.r2.4HG0332490,HORVU.MOREX.r2.7HG0554060,HORVU.MOREX.r2.2HG0179230,HORVU.MOREX.r2.4HG0335300,HORVU.MOREX.r2.1HG0073610,HORVU.MOREX.r2.2HG0178800,HORVU.MOREX.r2.7HG0553740,HORVU.MOREX.r2.1HG0073450,HORVU.MOREX.r2.2HG0178910,HORVU.MOR…	HORVU.MOREX.r2.7HG0554650,HORVU.MOREX.r2.3HG0206270,HORVU.MOREX.r2.1HG0064430,HORVU.MOREX.r2.1HG0073510,HORVU.MOREX.r2.4HG0339320,HORVU.MOREX.r2.1HG0073500	HORVU.MOREX.r2.6HG0460170,HORVU.MOREX.r2.4HG0332920,HORVU.MOREX.r2.1HG0064430,HORVU.MOREX.r2.5HG0434090,HORVU.MOREX.r2.4HG0342010,HORVU.MOREX.r2.7HG0597270,HORVU.MOREX.r2.7HG0554650,HORVU.MOREX.r2.7HG0620440,HORVU.MOREX.r2.1HG0046680,HORVU.MOREX.r2.5HG0413910,HORVU.MOREX.r2.4HG0339130,HORVU.MOREX.r2.7HG0620420,HORVU.MOREX.r2.6HG0460210,HORVU.MOREX.r2.6HG0487560,HORVU.MOREX.r2.6HG0523360,HORVU.MOR…	0.243953	0.563033	0.329991
128	91	266	21	21	HORVU.MOREX.r2.1HG0001750,HORVU.MOREX.r2.3HG0268400,HORVU.MOREX.r2.4HG0291260,HORVU.MOREX.r2.1HG0002560,HORVU.MOREX.r2.1HG0002570,HORVU.MOREX.r2.7HG0549450,HORVU.MOREX.r2.2HG0178910,HORVU.MOREX.r2.5HG0385350,HORVU.MOREX.r2.4HG0338800,HORVU.MOREX.r2.2HG0176000,HORVU.MOREX.r2.1HG0002180,HORVU.MOREX.r2.3HG0268390,HORVU.MOREX.r2.5HG0411900,HORVU.MOREX.r2.2HG0175600,HORVU.MOREX.r2.2HG0178800,HORVU.MOR…	HORVU.MOREX.r2.1HG0040870,HORVU.MOREX.r2.2HG0176250,HORVU.MOREX.r2.4HG0325660,HORVU.MOREX.r2.5HG0411130,HORVU.MOREX.r2.7HG0549340,HORVU.MOREX.r2.1HG0057800,HORVU.MOREX.r2.4HG0291420,HORVU.MOREX.r2.7HG0549650,HORVU.MOREX.r2.5HG0411550,HORVU.MOREX.r2.7HG0549470,HORVU.MOREX.r2.4HG0278090,HORVU.MOREX.r2.1HG0002200,HORVU.MOREX.r2.5HG0380850,HORVU.MOREX.r2.7HG0559880,HORVU.MOREX.r2.5HG0429140,HORVU.MOR…	HORVU.MOREX.r2.5HG0370280,HORVU.MOREX.r2.1HG0040870,HORVU.MOREX.r2.1HG0060710,HORVU.MOREX.r2.4HG0325660,HORVU.MOREX.r2.2HG0166910,HORVU.MOREX.r2.7HG0564570,HORVU.MOREX.r2.4HG0295780,HORVU.MOREX.r2.7HG0537330,HORVU.MOREX.r2.1HG0064550,HORVU.MOREX.r2.1HG0002200,HORVU.MOREX.r2.5HG0437290,HORVU.MOREX.r2.5HG0380850,HORVU.MOREX.r2.5HG0429140,HORVU.MOREX.r2.6HG0498990,HORVU.MOREX.r2.7HG0529350,HORVU.MOR…	0.245643	0.731065	0.329991
129	33	54	8	6	HORVU.MOREX.r2.4HG0286450,HORVU.MOREX.r2.4HG0335240,HORVU.MOREX.r2.4HG0334770,HORVU.MOREX.r2.4HG0334170,HORVU.MOREX.r2.4HG0286540,HORVU.MOREX.r2.4HG0285890,HORVU.MOREX.r2.4HG0334160,HORVU.MOREX.r2.7HG0615210	HORVU.MOREX.r2.1HG0052350,HORVU.MOREX.r2.4HG0286650,HORVU.MOREX.r2.4HG0286120,HORVU.MOREX.r2.4HG0299270,HORVU.MOREX.r2.4HG0335180,HORVU.MOREX.r2.7HG0591620	HORVU.MOREX.r2.2HG0133130,HORVU.MOREX.r2.4HG0335180,HORVU.MOREX.r2.2HG0173820,HORVU.MOREX.r2.4HG0286650,HORVU.MOREX.r2.5HG0426310,HORVU.MOREX.r2.6HG0496410,HORVU.MOREX.r2.5HG0431450,HORVU.MOREX.r2.4HG0286120,HORVU.MOREX.r2.5HG0425750,HORVU.MOREX.r2.2HG0167780,HORVU.MOREX.r2.1HG0041620,HORVU.MOREX.r2.1HG0037400,HORVU.MOREX.r2.1HG0052350,HORVU.MOREX.r2.4HG0299270,HORVU.MOREX.r2.2HG0123780,HORVU.MOR…	0.247493	0.542093	0.329991
130	24	15	4	4	HORVU.MOREX.r2.1HG0072140,HORVU.MOREX.r2.3HG0188040,HORVU.MOREX.r2.3HG0188850,HORVU.MOREX.r2.4HG0338800	HORVU.MOREX.r2.3HG0188980,HORVU.MOREX.r2.3HG0190290,HORVU.MOREX.r2.4HG0339670,HORVU.MOREX.r2.1HG0071830	HORVU.MOREX.r2.6HG0490570,HORVU.MOREX.r2.3HG0190290,HORVU.MOREX.r2.2HG0106890,HORVU.MOREX.r2.1HG0031000,HORVU.MOREX.r2.2HG0107840,HORVU.MOREX.r2.4HG0320260,HORVU.MOREX.r2.5HG0402420,HORVU.MOREX.r2.3HG0272140,HORVU.MOREX.r2.3HG0188980,HORVU.MOREX.r2.1HG0071830,HORVU.MOREX.r2.2HG0146220,HORVU.MOREX.r2.4HG0339670,HORVU.MOREX.r2.7HG0561340	0.259392	0.48805	0.343195
131	25	124	12	10	HORVU.MOREX.r2.1HG0001750,HORVU.MOREX.r2.1HG0002560,HORVU.MOREX.r2.1HG0002570,HORVU.MOREX.r2.1HG0003750,HORVU.MOREX.r2.4HG0291260,HORVU.MOREX.r2.2HG0176000,HORVU.MOREX.r2.1HG0002180,HORVU.MOREX.r2.2HG0175600,HORVU.MOREX.r2.2HG0176780,HORVU.MOREX.r2.7HG0566960,HORVU.MOREX.r2.7HG0567710,HORVU.MOREX.r2.1HG0001710	HORVU.MOREX.r2.3HG0249800,HORVU.MOREX.r2.3HG0202580,HORVU.MOREX.r2.6HG0485270,HORVU.MOREX.r2.1HG0002860,HORVU.MOREX.r2.1HG0002200,HORVU.MOREX.r2.5HG0349250,HORVU.MOREX.r2.1HG0027140,HORVU.MOREX.r2.4HG0284390,HORVU.MOREX.r2.7HG0591610,HORVU.MOREX.r2.1HG0002210	HORVU.MOREX.r2.3HG0249800,HORVU.MOREX.r2.5HG0446970,HORVU.MOREX.r2.6HG0448440,HORVU.MOREX.r2.3HG0202580,HORVU.MOREX.r2.6HG0485270,HORVU.MOREX.r2.1HG0002860,HORVU.MOREX.r2.1HG0029530,HORVU.MOREX.r2.1HG0002200,HORVU.MOREX.r2.5HG0349250,HORVU.MOREX.r2.7HG0607610,HORVU.MOREX.r2.5HG0446960,HORVU.MOREX.r2.1HG0027140,HORVU.MOREX.r2.4HG0284390,HORVU.MOREX.r2.7HG0591600,HORVU.MOREX.r2.7HG0591610,HORVU.MOR…	0.268829	1.63199	0.352966
132	41	99	21	15	HORVU.MOREX.r2.2HG0136120,HORVU.MOREX.r2.7HG0604260,HORVU.MOREX.r2.7HG0603640,HORVU.MOREX.r2.2HG0133070,HORVU.MOREX.r2.2HG0136610,HORVU.MOREX.r2.3HG0181630,HORVU.MOREX.r2.2HG0146390,HORVU.MOREX.r2.6HG0449560,HORVU.MOREX.r2.6HG0449710,HORVU.MOREX.r2.2HG0178910,HORVU.MOREX.r2.2HG0136750,HORVU.MOREX.r2.7HG0603900,HORVU.MOREX.r2.2HG0138950,HORVU.MOREX.r2.2HG0136270,HORVU.MOREX.r2.2HG0178800,HORVU.MOR…	HORVU.MOREX.r2.2HG0137040,HORVU.MOREX.r2.2HG0135990,HORVU.MOREX.r2.7HG0603920,HORVU.MOREX.r2.2HG0118810,HORVU.MOREX.r2.3HG0249470,HORVU.MOREX.r2.1HG0048910,HORVU.MOREX.r2.1HG0036440,HORVU.MOREX.r2.7HG0601050,HORVU.MOREX.r2.6HG0450060,HORVU.MOREX.r2.2HG0146380,HORVU.MOREX.r2.7HG0601970,HORVU.MOREX.r2.2HG0139100,HORVU.MOREX.r2.7HG0604010,HORVU.MOREX.r2.7HG0603840,HORVU.MOREX.r2.3HG0184150	HORVU.MOREX.r2.2HG0137040,HORVU.MOREX.r2.1HG0048910,HORVU.MOREX.r2.7HG0601050,HORVU.MOREX.r2.2HG0146380,HORVU.MOREX.r2.3HG0198250,HORVU.MOREX.r2.7HG0607090,HORVU.MOREX.r2.7HG0595460,HORVU.MOREX.r2.4HG0325840,HORVU.MOREX.r2.3HG0184150,HORVU.MOREX.r2.2HG0135990,HORVU.MOREX.r2.7HG0603920,HORVU.MOREX.r2.2HG0118810,HORVU.MOREX.r2.3HG0249470,HORVU.MOREX.r2.1HG0045440,HORVU.MOREX.r2.1HG0006140,HORVU.MOR…	0.301881	1.41258	0.39336
133	33	94	17	12	HORVU.MOREX.r2.7HG0539830,HORVU.MOREX.r2.7HG0540350,HORVU.MOREX.r2.7HG0540230,HORVU.MOREX.r2.2HG0165330,HORVU.MOREX.r2.UnG0631250,HORVU.MOREX.r2.2HG0164520,HORVU.MOREX.r2.2HG0163570,HORVU.MOREX.r2.2HG0162870,HORVU.MOREX.r2.7HG0539630,HORVU.MOREX.r2.7HG0540180,HORVU.MOREX.r2.2HG0163880,HORVU.MOREX.r2.2HG0165430,HORVU.MOREX.r2.2HG0165270,HORVU.MOREX.r2.2HG0164830,HORVU.MOREX.r2.2HG0164090,HORVU.MOR…	HORVU.MOREX.r2.5HG0396150,HORVU.MOREX.r2.2HG0163480,HORVU.MOREX.r2.2HG0097130,HORVU.MOREX.r2.4HG0277460,HORVU.MOREX.r2.7HG0539700,HORVU.MOREX.r2.7HG0541630,HORVU.MOREX.r2.2HG0163250,HORVU.MOREX.r2.2HG0164690,HORVU.MOREX.r2.7HG0541080,HORVU.MOREX.r2.7HG0539930,HORVU.MOREX.r2.2HG0164550,HORVU.MOREX.r2.5HG0446940	HORVU.MOREX.r2.5HG0396150,HORVU.MOREX.r2.1HG0041260,HORVU.MOREX.r2.2HG0163480,HORVU.MOREX.r2.4HG0277460,HORVU.MOREX.r2.7HG0539700,HORVU.MOREX.r2.2HG0164690,HORVU.MOREX.r2.7HG0541630,HORVU.MOREX.r2.2HG0163250,HORVU.MOREX.r2.2HG0097130,HORVU.MOREX.r2.7HG0541080,HORVU.MOREX.r2.7HG0539930,HORVU.MOREX.r2.2HG0164550,HORVU.MOREX.r2.5HG0407020,HORVU.MOREX.r2.2HG0110630,HORVU.MOREX.r2.7HG0564940,HORVU.MOR…	0.342371	1.3986	0.442766
134	50	122	22	11	HORVU.MOREX.r2.6HG0510630,HORVU.MOREX.r2.6HG0451050,HORVU.MOREX.r2.7HG0543070,HORVU.MOREX.r2.2HG0178800,HORVU.MOREX.r2.7HG0582650,HORVU.MOREX.r2.6HG0451070,HORVU.MOREX.r2.2HG0179230,HORVU.MOREX.r2.6HG0450740,HORVU.MOREX.r2.7HG0560510,HORVU.MOREX.r2.2HG0178910,HORVU.MOREX.r2.7HG0582310,HORVU.MOREX.r2.7HG0583550,HORVU.MOREX.r2.7HG0559570,HORVU.MOREX.r2.7HG0568570,HORVU.MOREX.r2.7HG0582810,HORVU.MOR…	HORVU.MOREX.r2.7HG0554720,HORVU.MOREX.r2.7HG0581720,HORVU.MOREX.r2.6HG0510930,HORVU.MOREX.r2.6HG0510810,HORVU.MOREX.r2.1HG0052160,HORVU.MOREX.r2.1HG0019760,HORVU.MOREX.r2.6HG0475730,HORVU.MOREX.r2.6HG0514510,HORVU.MOREX.r2.6HG0450620,HORVU.MOREX.r2.1HG0011090,HORVU.MOREX.r2.7HG0568550	HORVU.MOREX.r2.3HG0230410,HORVU.MOREX.r2.7HG0554720,HORVU.MOREX.r2.6HG0510810,HORVU.MOREX.r2.1HG0019760,HORVU.MOREX.r2.7HG0583800,HORVU.MOREX.r2.1HG0011090,HORVU.MOREX.r2.7HG0578400,HORVU.MOREX.r2.2HG0145180,HORVU.MOREX.r2.3HG0256400,HORVU.MOREX.r2.5HG0437350,HORVU.MOREX.r2.6HG0510930,HORVU.MOREX.r2.6HG0514510,HORVU.MOREX.r2.1HG0052160,HORVU.MOREX.r2.4HG0338920,HORVU.MOREX.r2.5HG0383970,HORVU.MOR…	0.34834	0.688063	0.444965
135	22	11	7	4	HORVU.MOREX.r2.2HG0178910,HORVU.MOREX.r2.2HG0176000,HORVU.MOREX.r2.2HG0175600,HORVU.MOREX.r2.2HG0178800,HORVU.MOREX.r2.2HG0176780,HORVU.MOREX.r2.2HG0179230,HORVU.MOREX.r2.2HG0114200	HORVU.MOREX.r2.2HG0114340,HORVU.MOREX.r2.6HG0520040,HORVU.MOREX.r2.2HG0114300,HORVU.MOREX.r2.3HG0248190	HORVU.MOREX.r2.6HG0466110,HORVU.MOREX.r2.2HG0179250,HORVU.MOREX.r2.4HG0288670,HORVU.MOREX.r2.3HG0239180,HORVU.MOREX.r2.5HG0398160,HORVU.MOREX.r2.3HG0272820,HORVU.MOREX.r2.4HG0340460,HORVU.MOREX.r2.7HG0561290,HORVU.MOREX.r2.2HG0111730,HORVU.MOREX.r2.6HG0466170,HORVU.MOREX.r2.6HG0462000,HORVU.MOREX.r2.1HG0078390,HORVU.MOREX.r2.7HG0583690,HORVU.MOREX.r2.6HG0466150,HORVU.MOREX.r2.3HG0239120,HORVU.MOR…	0.349246	0.542453	0.444965
136	37	55	29	8	HORVU.MOREX.r2.2HG0106820,HORVU.MOREX.r2.5HG0438470,HORVU.MOREX.r2.2HG0178800,HORVU.MOREX.r2.5HG0439050,HORVU.MOREX.r2.2HG0179230,HORVU.MOREX.r2.7HG0604200,HORVU.MOREX.r2.1HG0064120,HORVU.MOREX.r2.5HG0439140,HORVU.MOREX.r2.2HG0178910,HORVU.MOREX.r2.5HG0439240,HORVU.MOREX.r2.4HG0341020,HORVU.MOREX.r2.2HG0176780,HORVU.MOREX.r2.1HG0064450,HORVU.MOREX.r2.1HG0000450,HORVU.MOREX.r2.3HG0240080,HORVU.MOR…	HORVU.MOREX.r2.1HG0010080,HORVU.MOREX.r2.1HG0064690,HORVU.MOREX.r2.3HG0209630,HORVU.MOREX.r2.1HG0013190,HORVU.MOREX.r2.7HG0618650,HORVU.MOREX.r2.1HG0000470,HORVU.MOREX.r2.5HG0438710,HORVU.MOREX.r2.7HG0603840	HORVU.MOREX.r2.2HG0155170,HORVU.MOREX.r2.7HG0583750,HORVU.MOREX.r2.4HG0295710,HORVU.MOREX.r2.4HG0295190,HORVU.MOREX.r2.6HG0508800,HORVU.MOREX.r2.3HG0209630,HORVU.MOREX.r2.1HG0013190,HORVU.MOREX.r2.5HG0443250,HORVU.MOREX.r2.7HG0603840,HORVU.MOREX.r2.4HG0278900,HORVU.MOREX.r2.1HG0000470,HORVU.MOREX.r2.2HG0156780,HORVU.MOREX.r2.5HG0438710,HORVU.MOREX.r2.7HG0616280,HORVU.MOREX.r2.1HG0039950,HORVU.MOR…	0.368744	0.673255	0.466353
137	56	169	22	13	HORVU.MOREX.r2.7HG0601560,HORVU.MOREX.r2.5HG0438470,HORVU.MOREX.r2.7HG0545540,HORVU.MOREX.r2.6HG0504900,HORVU.MOREX.r2.5HG0439100,HORVU.MOREX.r2.5HG0439140,HORVU.MOREX.r2.6HG0505150,HORVU.MOREX.r2.1HG0046280,HORVU.MOREX.r2.5HG0439240,HORVU.MOREX.r2.4HG0341020,HORVU.MOREX.r2.7HG0601660,HORVU.MOREX.r2.6HG0504200,HORVU.MOREX.r2.6HG0505240,HORVU.MOREX.r2.3HG0240080,HORVU.MOREX.r2.2HG0139120,HORVU.MOR…	HORVU.MOREX.r2.1HG0046300,HORVU.MOREX.r2.7HG0601850,HORVU.MOREX.r2.1HG0046050,HORVU.MOREX.r2.5HG0439020,HORVU.MOREX.r2.7HG0602340,HORVU.MOREX.r2.6HG0504410,HORVU.MOREX.r2.6HG0503990,HORVU.MOREX.r2.5HG0438690,HORVU.MOREX.r2.5HG0439370,HORVU.MOREX.r2.5HG0438940,HORVU.MOREX.r2.7HG0600890,HORVU.MOREX.r2.5HG0438710,HORVU.MOREX.r2.6HG0504810	HORVU.MOREX.r2.5HG0360770,HORVU.MOREX.r2.1HG0046050,HORVU.MOREX.r2.4HG0279490,HORVU.MOREX.r2.1HG0046300,HORVU.MOREX.r2.1HG0045490,HORVU.MOREX.r2.5HG0438690,HORVU.MOREX.r2.6HG0498460,HORVU.MOREX.r2.2HG0115270,HORVU.MOREX.r2.7HG0583750,HORVU.MOREX.r2.1HG0053600,HORVU.MOREX.r2.7HG0601850,HORVU.MOREX.r2.6HG0503990,HORVU.MOREX.r2.5HG0439020,HORVU.MOREX.r2.5HG0443250,HORVU.MOREX.r2.7HG0549320,HORVU.MOR…	0.378366	0.737627	0.474982
138	25	47	7	5	HORVU.MOREX.r2.2HG0180770,HORVU.MOREX.r2.6HG0459120,HORVU.MOREX.r2.6HG0459110,HORVU.MOREX.r2.2HG0178910,HORVU.MOREX.r2.2HG0178800,HORVU.MOREX.r2.2HG0179230,HORVU.MOREX.r2.2HG0181050	HORVU.MOREX.r2.5HG0379030,HORVU.MOREX.r2.3HG0210880,HORVU.MOREX.r2.6HG0467930,HORVU.MOREX.r2.5HG0362110,HORVU.MOREX.r2.6HG0459010	HORVU.MOREX.r2.5HG0379030,HORVU.MOREX.r2.4HG0327390,HORVU.MOREX.r2.2HG0087700,HORVU.MOREX.r2.5HG0446110,HORVU.MOREX.r2.4HG0332150,HORVU.MOREX.r2.6HG0498920,HORVU.MOREX.r2.2HG0160480,HORVU.MOREX.r2.1HG0044160,HORVU.MOREX.r2.1HG0068000,HORVU.MOREX.r2.6HG0467930,HORVU.MOREX.r2.3HG0210880,HORVU.MOREX.r2.7HG0562980,HORVU.MOREX.r2.6HG0502990,HORVU.MOREX.r2.6HG0459010,HORVU.MOREX.r2.4HG0290190,HORVU.MOR…	0.383852	0.610303	0.474982
139	25	33	6	5	HORVU.MOREX.r2.1HG0076360,HORVU.MOREX.r2.1HG0076680,HORVU.MOREX.r2.1HG0075930,HORVU.MOREX.r2.1HG0076850,HORVU.MOREX.r2.1HG0075910,HORVU.MOREX.r2.1HG0076430	HORVU.MOREX.r2.1HG0076500,HORVU.MOREX.r2.1HG0075250,HORVU.MOREX.r2.1HG0076230,HORVU.MOREX.r2.1HG0075880,HORVU.MOREX.r2.1HG0075760	HORVU.MOREX.r2.4HG0277550,HORVU.MOREX.r2.6HG0522870,HORVU.MOREX.r2.1HG0044450,HORVU.MOREX.r2.1HG0075250,HORVU.MOREX.r2.7HG0580890,HORVU.MOREX.r2.1HG0020140,HORVU.MOREX.r2.7HG0580960,HORVU.MOREX.r2.1HG0038390,HORVU.MOREX.r2.4HG0321550,HORVU.MOREX.r2.1HG0076230,HORVU.MOREX.r2.1HG0075880,HORVU.MOREX.r2.7HG0527700,HORVU.MOREX.r2.3HG0201110,HORVU.MOREX.r2.1HG0076500,HORVU.MOREX.r2.1HG0075760,HORVU.MOR…	0.383852	0.610303	0.474982
140	27	129	17	10	HORVU.MOREX.r2.5HG0398040,HORVU.MOREX.r2.5HG0393410,HORVU.MOREX.r2.5HG0395560,HORVU.MOREX.r2.5HG0397220,HORVU.MOREX.r2.5HG0396840,HORVU.MOREX.r2.5HG0398060,HORVU.MOREX.r2.5HG0396550,HORVU.MOREX.r2.5HG0398680,HORVU.MOREX.r2.5HG0397830,HORVU.MOREX.r2.5HG0394730,HORVU.MOREX.r2.5HG0396910,HORVU.MOREX.r2.5HG0394700,HORVU.MOREX.r2.5HG0393650,HORVU.MOREX.r2.5HG0393770,HORVU.MOREX.r2.5HG0398400,HORVU.MOR…	HORVU.MOREX.r2.5HG0394800,HORVU.MOREX.r2.5HG0397800,HORVU.MOREX.r2.5HG0393830,HORVU.MOREX.r2.5HG0394510,HORVU.MOREX.r2.5HG0398110,HORVU.MOREX.r2.5HG0395050,HORVU.MOREX.r2.5HG0395330,HORVU.MOREX.r2.5HG0356650,HORVU.MOREX.r2.5HG0394040,HORVU.MOREX.r2.5HG0396100	HORVU.MOREX.r2.5HG0394800,HORVU.MOREX.r2.5HG0397800,HORVU.MOREX.r2.6HG0524330,HORVU.MOREX.r2.5HG0393830,HORVU.MOREX.r2.5HG0394510,HORVU.MOREX.r2.5HG0398110,HORVU.MOREX.r2.5HG0395050,HORVU.MOREX.r2.5HG0395330,HORVU.MOREX.r2.5HG0356650,HORVU.MOREX.r2.5HG0394040,HORVU.MOREX.r2.7HG0572070,HORVU.MOREX.r2.5HG0396100	0.396131	1.43953	0.486675
141	20	42	3	4	HORVU.MOREX.r2.2HG0178910,HORVU.MOREX.r2.2HG0178800,HORVU.MOREX.r2.2HG0179230	HORVU.MOREX.r2.4HG0317680,HORVU.MOREX.r2.3HG0237450,HORVU.MOREX.r2.2HG0139900,HORVU.MOREX.r2.1HG0074340	HORVU.MOREX.r2.5HG0424550,HORVU.MOREX.r2.6HG0472760,HORVU.MOREX.r2.5HG0421060,HORVU.MOREX.r2.2HG0142570,HORVU.MOREX.r2.3HG0237450,HORVU.MOREX.r2.6HG0487080,HORVU.MOREX.r2.1HG0074340,HORVU.MOREX.r2.2HG0142550,HORVU.MOREX.r2.4HG0317680,HORVU.MOREX.r2.7HG0538080,HORVU.MOREX.r2.2HG0139900,HORVU.MOREX.r2.4HG0281970,HORVU.MOREX.r2.4HG0304810,HORVU.MOREX.r2.3HG0202190,HORVU.MOREX.r2.3HG0242640	0.466074	0.610456	0.568545
142	21	37	5	4	HORVU.MOREX.r2.3HG0265830,HORVU.MOREX.r2.2HG0178910,HORVU.MOREX.r2.3HG0265860,HORVU.MOREX.r2.2HG0178800,HORVU.MOREX.r2.2HG0179230	HORVU.MOREX.r2.3HG0265280,HORVU.MOREX.r2.3HG0265950,HORVU.MOREX.r2.4HG0309820,HORVU.MOREX.r2.2HG0079930	HORVU.MOREX.r2.3HG0266640,HORVU.MOREX.r2.3HG0266050,HORVU.MOREX.r2.7HG0622400,HORVU.MOREX.r2.4HG0286950,HORVU.MOREX.r2.5HG0403270,HORVU.MOREX.r2.4HG0309820,HORVU.MOREX.r2.4HG0288510,HORVU.MOREX.r2.3HG0266190,HORVU.MOREX.r2.3HG0266030,HORVU.MOREX.r2.3HG0266310,HORVU.MOREX.r2.3HG0265280,HORVU.MOREX.r2.1HG0047170,HORVU.MOREX.r2.3HG0266430,HORVU.MOREX.r2.3HG0270520,HORVU.MOREX.r2.3HG0266210,HORVU.MOR…	0.470019	0.574454	0.569319
143	22	28	6	8	HORVU.MOREX.r2.3HG0262130,HORVU.MOREX.r2.3HG0262550,HORVU.MOREX.r2.3HG0260630,HORVU.MOREX.r2.3HG0262060,HORVU.MOREX.r2.3HG0260280,HORVU.MOREX.r2.3HG0261470	HORVU.MOREX.r2.3HG0260920,HORVU.MOREX.r2.3HG0261560,HORVU.MOREX.r2.3HG0260240,HORVU.MOREX.r2.3HG0266360,HORVU.MOREX.r2.3HG0260620,HORVU.MOREX.r2.3HG0261010,HORVU.MOREX.r2.2HG0152860,HORVU.MOREX.r2.3HG0261310	HORVU.MOREX.r2.6HG0526780,HORVU.MOREX.r2.3HG0262010,HORVU.MOREX.r2.3HG0261010,HORVU.MOREX.r2.3HG0262040,HORVU.MOREX.r2.3HG0260920,HORVU.MOREX.r2.6HG0514290,HORVU.MOREX.r2.3HG0260240,HORVU.MOREX.r2.3HG0266360,HORVU.MOREX.r2.3HG0260620,HORVU.MOREX.r2.3HG0261560,HORVU.MOREX.r2.4HG0307760,HORVU.MOREX.r2.5HG0410830,HORVU.MOREX.r2.2HG0152860,HORVU.MOREX.r2.3HG0261310	0.482016	1.39798	0.579069
144	40	97	36	9	HORVU.MOREX.r2.7HG0615630,HORVU.MOREX.r2.1HG0065920,HORVU.MOREX.r2.3HG0210420,HORVU.MOREX.r2.3HG0209860,HORVU.MOREX.r2.1HG0065680,HORVU.MOREX.r2.3HG0225790,HORVU.MOREX.r2.6HG0464080,HORVU.MOREX.r2.3HG0209090,HORVU.MOREX.r2.7HG0617000,HORVU.MOREX.r2.2HG0178800,HORVU.MOREX.r2.7HG0621290,HORVU.MOREX.r2.7HG0617100,HORVU.MOREX.r2.3HG0232450,HORVU.MOREX.r2.1HG0065490,HORVU.MOREX.r2.3HG0229390,HORVU.MOR…	HORVU.MOREX.r2.7HG0616560,HORVU.MOREX.r2.7HG0616470,HORVU.MOREX.r2.3HG0222920,HORVU.MOREX.r2.4HG0348890,HORVU.MOREX.r2.6HG0463980,HORVU.MOREX.r2.7HG0616250,HORVU.MOREX.r2.1HG0066670,HORVU.MOREX.r2.1HG0066400,HORVU.MOREX.r2.7HG0618480	HORVU.MOREX.r2.7HG0616560,HORVU.MOREX.r2.2HG0093310,HORVU.MOREX.r2.3HG0219750,HORVU.MOREX.r2.1HG0066400,HORVU.MOREX.r2.7HG0582860,HORVU.MOREX.r2.3HG0222920,HORVU.MOREX.r2.6HG0471210,HORVU.MOREX.r2.2HG0102110,HORVU.MOREX.r2.6HG0463980,HORVU.MOREX.r2.7HG0616250,HORVU.MOREX.r2.2HG0147940,HORVU.MOREX.r2.2HG0104830,HORVU.MOREX.r2.7HG0618480,HORVU.MOREX.r2.3HG0216650,HORVU.MOREX.r2.7HG0616470,HORVU.MOR…	0.484802	0.708597	0.579069
145	23	72	9	8	HORVU.MOREX.r2.7HG0567710,HORVU.MOREX.r2.7HG0568570,HORVU.MOREX.r2.7HG0568920,HORVU.MOREX.r2.7HG0572100,HORVU.MOREX.r2.7HG0582650,HORVU.MOREX.r2.7HG0582810,HORVU.MOREX.r2.7HG0583550,HORVU.MOREX.r2.7HG0566960,HORVU.MOREX.r2.7HG0582310	HORVU.MOREX.r2.7HG0581870,HORVU.MOREX.r2.7HG0572340,HORVU.MOREX.r2.7HG0583930,HORVU.MOREX.r2.7HG0585630,HORVU.MOREX.r2.7HG0581720,HORVU.MOREX.r2.7HG0581130,HORVU.MOREX.r2.7HG0581770,HORVU.MOREX.r2.7HG0591610	HORVU.MOREX.r2.4HG0319880,HORVU.MOREX.r2.6HG0511170,HORVU.MOREX.r2.1HG0049170,HORVU.MOREX.r2.7HG0581870,HORVU.MOREX.r2.7HG0572340,HORVU.MOREX.r2.7HG0583930,HORVU.MOREX.r2.7HG0585630,HORVU.MOREX.r2.2HG0132470,HORVU.MOREX.r2.7HG0581720,HORVU.MOREX.r2.7HG0581130,HORVU.MOREX.r2.7HG0581770,HORVU.MOREX.r2.7HG0591610,HORVU.MOREX.r2.1HG0073250	0.500818	1.30457	0.594073
146	27	62	8	6	HORVU.MOREX.r2.2HG0178910,HORVU.MOREX.r2.2HG0176000,HORVU.MOREX.r2.2HG0175600,HORVU.MOREX.r2.UnG0630370,HORVU.MOREX.r2.2HG0176780,HORVU.MOREX.r2.7HG0534430,HORVU.MOREX.r2.2HG0179230,HORVU.MOREX.r2.2HG0178800	HORVU.MOREX.r2.4HG0331210,HORVU.MOREX.r2.1HG0051160,HORVU.MOREX.r2.7HG0568980,HORVU.MOREX.r2.6HG0516030,HORVU.MOREX.r2.7HG0532760,HORVU.MOREX.r2.7HG0550270	HORVU.MOREX.r2.5HG0413020,HORVU.MOREX.r2.4HG0331210,HORVU.MOREX.r2.1HG0021300,HORVU.MOREX.r2.7HG0568980,HORVU.MOREX.r2.3HG0200700,HORVU.MOREX.r2.2HG0128840,HORVU.MOREX.r2.1HG0071500,HORVU.MOREX.r2.4HG0299490,HORVU.MOREX.r2.5HG0425760,HORVU.MOREX.r2.7HG0551940,HORVU.MOREX.r2.1HG0037100,HORVU.MOREX.r2.6HG0461770,HORVU.MOREX.r2.3HG0221930,HORVU.MOREX.r2.7HG0550270,HORVU.MOREX.r2.5HG0388370,HORVU.MOR…	0.528256	0.697651	0.622329
147	30	25	3	7	HORVU.MOREX.r2.2HG0178910,HORVU.MOREX.r2.2HG0178800,HORVU.MOREX.r2.2HG0179230	HORVU.MOREX.r2.4HG0281140,HORVU.MOREX.r2.4HG0324220,HORVU.MOREX.r2.4HG0318250,HORVU.MOREX.r2.7HG0538650,HORVU.MOREX.r2.3HG0229090,HORVU.MOREX.r2.5HG0389190,HORVU.MOREX.r2.4HG0342490	HORVU.MOREX.r2.4HG0324220,HORVU.MOREX.r2.4HG0318250,HORVU.MOREX.r2.3HG0244300,HORVU.MOREX.r2.6HG0522750,HORVU.MOREX.r2.7HG0538650,HORVU.MOREX.r2.3HG0229090,HORVU.MOREX.r2.4HG0282210,HORVU.MOREX.r2.3HG0185180,HORVU.MOREX.r2.6HG0508530,HORVU.MOREX.r2.2HG0091070,HORVU.MOREX.r2.7HG0574400,HORVU.MOREX.r2.2HG0144030,HORVU.MOREX.r2.3HG0196530,HORVU.MOREX.r2.5HG0389190,HORVU.MOREX.r2.7HG0603780,HORVU.MOR…	0.55263	0.743203	0.646614
148	35	110	10	8	HORVU.MOREX.r2.6HG0459490,HORVU.MOREX.r2.2HG0178910,HORVU.MOREX.r2.6HG0459500,HORVU.MOREX.r2.2HG0179230,HORVU.MOREX.r2.6HG0458560,HORVU.MOREX.r2.6HG0458440,HORVU.MOREX.r2.2HG0178800,HORVU.MOREX.r2.3HG0233470,HORVU.MOREX.r2.6HG0458540,HORVU.MOREX.r2.6HG0459250	HORVU.MOREX.r2.4HG0331860,HORVU.MOREX.r2.3HG0209300,HORVU.MOREX.r2.6HG0521660,HORVU.MOREX.r2.6HG0459340,HORVU.MOREX.r2.1HG0064560,HORVU.MOREX.r2.3HG0191650,HORVU.MOREX.r2.1HG0064590,HORVU.MOREX.r2.6HG0459280	HORVU.MOREX.r2.7HG0613370,HORVU.MOREX.r2.1HG0046470,HORVU.MOREX.r2.1HG0075570,HORVU.MOREX.r2.UnG0628900,HORVU.MOREX.r2.3HG0191650,HORVU.MOREX.r2.7HG0615100,HORVU.MOREX.r2.1HG0064590,HORVU.MOREX.r2.3HG0191730,HORVU.MOREX.r2.3HG0252730,HORVU.MOREX.r2.6HG0479380,HORVU.MOREX.r2.4HG0331860,HORVU.MOREX.r2.3HG0209300,HORVU.MOREX.r2.1HG0047820,HORVU.MOREX.r2.1HG0047880,HORVU.MOREX.r2.6HG0521660,HORVU.MOR…	0.575577	0.72336	0.668913
149	38	141	23	9	HORVU.MOREX.r2.6HG0494310,HORVU.MOREX.r2.6HG0494580,HORVU.MOREX.r2.7HG0612990,HORVU.MOREX.r2.6HG0503330,HORVU.MOREX.r2.6HG0495440,HORVU.MOREX.r2.7HG0616150,HORVU.MOREX.r2.6HG0502370,HORVU.MOREX.r2.7HG0612840,HORVU.MOREX.r2.6HG0493050,HORVU.MOREX.r2.6HG0502880,HORVU.MOREX.r2.6HG0481230,HORVU.MOREX.r2.6HG0493270,HORVU.MOREX.r2.6HG0449810,HORVU.MOREX.r2.6HG0494280,HORVU.MOREX.r2.7HG0616140,HORVU.MOR…	HORVU.MOREX.r2.6HG0479240,HORVU.MOREX.r2.7HG0612760,HORVU.MOREX.r2.7HG0612910,HORVU.MOREX.r2.6HG0502590,HORVU.MOREX.r2.6HG0493110,HORVU.MOREX.r2.6HG0492720,HORVU.MOREX.r2.6HG0503020,HORVU.MOREX.r2.6HG0481860,HORVU.MOREX.r2.6HG0494650	HORVU.MOREX.r2.5HG0350930,HORVU.MOREX.r2.7HG0557080,HORVU.MOREX.r2.6HG0492720,HORVU.MOREX.r2.7HG0612760,HORVU.MOREX.r2.5HG0398520,HORVU.MOREX.r2.7HG0612910,HORVU.MOREX.r2.6HG0507580,HORVU.MOREX.r2.6HG0493110,HORVU.MOREX.r2.6HG0502280,HORVU.MOREX.r2.6HG0479240,HORVU.MOREX.r2.2HG0100610,HORVU.MOREX.r2.6HG0502590,HORVU.MOREX.r2.6HG0503020,HORVU.MOREX.r2.6HG0481860,HORVU.MOREX.r2.6HG0494650	0.5916	0.757711	0.678368
150	38	105	33	9	HORVU.MOREX.r2.5HG0384030,HORVU.MOREX.r2.5HG0384050,HORVU.MOREX.r2.5HG0374410,HORVU.MOREX.r2.5HG0366280,HORVU.MOREX.r2.2HG0178800,HORVU.MOREX.r2.5HG0375540,HORVU.MOREX.r2.2HG0179230,HORVU.MOREX.r2.5HG0381870,HORVU.MOREX.r2.5HG0381090,HORVU.MOREX.r2.5HG0382660,HORVU.MOREX.r2.5HG0384070,HORVU.MOREX.r2.2HG0178910,HORVU.MOREX.r2.5HG0384340,HORVU.MOREX.r2.5HG0368540,HORVU.MOREX.r2.5HG0379510,HORVU.MOR…	HORVU.MOREX.r2.5HG0386630,HORVU.MOREX.r2.6HG0475180,HORVU.MOREX.r2.7HG0567930,HORVU.MOREX.r2.4HG0327040,HORVU.MOREX.r2.3HG0213080,HORVU.MOREX.r2.2HG0135340,HORVU.MOREX.r2.3HG0270810,HORVU.MOREX.r2.4HG0317830,HORVU.MOREX.r2.5HG0373350	HORVU.MOREX.r2.5HG0386630,HORVU.MOREX.r2.4HG0326080,HORVU.MOREX.r2.6HG0459100,HORVU.MOREX.r2.4HG0327040,HORVU.MOREX.r2.1HG0043940,HORVU.MOREX.r2.3HG0209460,HORVU.MOREX.r2.1HG0036000,HORVU.MOREX.r2.7HG0569380,HORVU.MOREX.r2.2HG0140440,HORVU.MOREX.r2.7HG0537160,HORVU.MOREX.r2.6HG0499630,HORVU.MOREX.r2.4HG0307030,HORVU.MOREX.r2.3HG0213080,HORVU.MOREX.r2.2HG0135340,HORVU.MOREX.r2.4HG0317830,HORVU.MOR…	0.5916	0.757711	0.678368
151	27	75	13	9	HORVU.MOREX.r2.6HG0453740,HORVU.MOREX.r2.1HG0064120,HORVU.MOREX.r2.2HG0106820,HORVU.MOREX.r2.1HG0064940,HORVU.MOREX.r2.6HG0452760,HORVU.MOREX.r2.1HG0064460,HORVU.MOREX.r2.6HG0453820,HORVU.MOREX.r2.6HG0452530,HORVU.MOREX.r2.6HG0454180,HORVU.MOREX.r2.1HG0064450,HORVU.MOREX.r2.2HG0094240,HORVU.MOREX.r2.6HG0454150,HORVU.MOREX.r2.6HG0452230	HORVU.MOREX.r2.1HG0064720,HORVU.MOREX.r2.6HG0452720,HORVU.MOREX.r2.1HG0064170,HORVU.MOREX.r2.6HG0452610,HORVU.MOREX.r2.6HG0453800,HORVU.MOREX.r2.1HG0064380,HORVU.MOREX.r2.1HG0064000,HORVU.MOREX.r2.6HG0454310,HORVU.MOREX.r2.1HG0064690	HORVU.MOREX.r2.1HG0064720,HORVU.MOREX.r2.6HG0452720,HORVU.MOREX.r2.7HG0552550,HORVU.MOREX.r2.3HG0227990,HORVU.MOREX.r2.1HG0064170,HORVU.MOREX.r2.6HG0452610,HORVU.MOREX.r2.6HG0453800,HORVU.MOREX.r2.1HG0064380,HORVU.MOREX.r2.1HG0064000,HORVU.MOREX.r2.6HG0454310,HORVU.MOREX.r2.3HG0243290,HORVU.MOREX.r2.3HG0230490,HORVU.MOREX.r2.1HG0064690	0.671641	1.22292	0.765048
152	33	43	6	8	HORVU.MOREX.r2.1HG0014550,HORVU.MOREX.r2.1HG0014200,HORVU.MOREX.r2.1HG0001030,HORVU.MOREX.r2.6HG0464080,HORVU.MOREX.r2.1HG0005040,HORVU.MOREX.r2.1HG0006400	HORVU.MOREX.r2.7HG0576130,HORVU.MOREX.r2.1HG0004900,HORVU.MOREX.r2.1HG0013890,HORVU.MOREX.r2.1HG0000670,HORVU.MOREX.r2.1HG0040170,HORVU.MOREX.r2.6HG0463980,HORVU.MOREX.r2.1HG0005400,HORVU.MOREX.r2.1HG0006250	HORVU.MOREX.r2.1HG0013890,HORVU.MOREX.r2.7HG0576130,HORVU.MOREX.r2.7HG0600740,HORVU.MOREX.r2.1HG0078410,HORVU.MOREX.r2.1HG0004900,HORVU.MOREX.r2.1HG0005400,HORVU.MOREX.r2.1HG0000670,HORVU.MOREX.r2.6HG0526190,HORVU.MOREX.r2.2HG0086880,HORVU.MOREX.r2.3HG0271840,HORVU.MOREX.r2.1HG0040170,HORVU.MOREX.r2.5HG0443080,HORVU.MOREX.r2.6HG0463980,HORVU.MOREX.r2.7HG0615990,HORVU.MOREX.r2.7HG0585940,HORVU.MOR…	0.701151	0.78148	0.793408
153	39	162	20	10	HORVU.MOREX.r2.1HG0038950,HORVU.MOREX.r2.1HG0031750,HORVU.MOREX.r2.1HG0039700,HORVU.MOREX.r2.1HG0038680,HORVU.MOREX.r2.1HG0039530,HORVU.MOREX.r2.1HG0033160,HORVU.MOREX.r2.1HG0038710,HORVU.MOREX.r2.1HG0039130,HORVU.MOREX.r2.1HG0039540,HORVU.MOREX.r2.1HG0033530,HORVU.MOREX.r2.1HG0042450,HORVU.MOREX.r2.1HG0015630,HORVU.MOREX.r2.1HG0041680,HORVU.MOREX.r2.1HG0038610,HORVU.MOREX.r2.1HG0038640,HORVU.MOR…	HORVU.MOREX.r2.1HG0015910,HORVU.MOREX.r2.1HG0038910,HORVU.MOREX.r2.1HG0027540,HORVU.MOREX.r2.1HG0014600,HORVU.MOREX.r2.1HG0015920,HORVU.MOREX.r2.1HG0017270,HORVU.MOREX.r2.1HG0039770,HORVU.MOREX.r2.1HG0032240,HORVU.MOREX.r2.1HG0032680,HORVU.MOREX.r2.1HG0016570	HORVU.MOREX.r2.1HG0015910,HORVU.MOREX.r2.1HG0038910,HORVU.MOREX.r2.1HG0032240,HORVU.MOREX.r2.1HG0014600,HORVU.MOREX.r2.3HG0212430,HORVU.MOREX.r2.1HG0015920,HORVU.MOREX.r2.3HG0248560,HORVU.MOREX.r2.1HG0017270,HORVU.MOREX.r2.3HG0223640,HORVU.MOREX.r2.1HG0039770,HORVU.MOREX.r2.7HG0595080,HORVU.MOREX.r2.1HG0016570,HORVU.MOREX.r2.1HG0032680,HORVU.MOREX.r2.1HG0027540,HORVU.MOREX.r2.5HG0390410	0.726046	0.842233	0.806909
154	40	63	13	10	HORVU.MOREX.r2.1HG0066930,HORVU.MOREX.r2.2HG0180770,HORVU.MOREX.r2.1HG0073610,HORVU.MOREX.r2.1HG0066860,HORVU.MOREX.r2.4HG0315870,HORVU.MOREX.r2.2HG0178910,HORVU.MOREX.r2.4HG0332490,HORVU.MOREX.r2.4HG0335300,HORVU.MOREX.r2.2HG0178800,HORVU.MOREX.r2.5HG0349820,HORVU.MOREX.r2.1HG0073450,HORVU.MOREX.r2.2HG0179230,HORVU.MOREX.r2.2HG0181050	HORVU.MOREX.r2.1HG0064430,HORVU.MOREX.r2.5HG0350940,HORVU.MOREX.r2.5HG0401340,HORVU.MOREX.r2.1HG0063350,HORVU.MOREX.r2.2HG0112010,HORVU.MOREX.r2.1HG0073510,HORVU.MOREX.r2.1HG0073660,HORVU.MOREX.r2.2HG0150130,HORVU.MOREX.r2.1HG0073360,HORVU.MOREX.r2.1HG0073500	HORVU.MOREX.r2.6HG0460170,HORVU.MOREX.r2.1HG0024040,HORVU.MOREX.r2.1HG0063350,HORVU.MOREX.r2.2HG0142880,HORVU.MOREX.r2.2HG0112010,HORVU.MOREX.r2.3HG0249480,HORVU.MOREX.r2.5HG0434090,HORVU.MOREX.r2.2HG0150130,HORVU.MOREX.r2.5HG0402660,HORVU.MOREX.r2.6HG0460210,HORVU.MOREX.r2.1HG0074180,HORVU.MOREX.r2.6HG0523360,HORVU.MOREX.r2.1HG0073500,HORVU.MOREX.r2.1HG0064430,HORVU.MOREX.r2.2HG0135590,HORVU.MOR…	0.727156	0.814027	0.806909
155	40	63	12	10	HORVU.MOREX.r2.6HG0459490,HORVU.MOREX.r2.3HG0213500,HORVU.MOREX.r2.1HG0056240,HORVU.MOREX.r2.2HG0178910,HORVU.MOREX.r2.6HG0459500,HORVU.MOREX.r2.2HG0179230,HORVU.MOREX.r2.6HG0458560,HORVU.MOREX.r2.6HG0458440,HORVU.MOREX.r2.2HG0178800,HORVU.MOREX.r2.3HG0233470,HORVU.MOREX.r2.6HG0458540,HORVU.MOREX.r2.6HG0459250	HORVU.MOREX.r2.4HG0331860,HORVU.MOREX.r2.3HG0209300,HORVU.MOREX.r2.1HG0056280,HORVU.MOREX.r2.6HG0458450,HORVU.MOREX.r2.6HG0459340,HORVU.MOREX.r2.1HG0064560,HORVU.MOREX.r2.3HG0191650,HORVU.MOREX.r2.1HG0064590,HORVU.MOREX.r2.6HG0459280,HORVU.MOREX.r2.1HG0056300	HORVU.MOREX.r2.1HG0054070,HORVU.MOREX.r2.7HG0613370,HORVU.MOREX.r2.1HG0075570,HORVU.MOREX.r2.6HG0475760,HORVU.MOREX.r2.UnG0628900,HORVU.MOREX.r2.3HG0191650,HORVU.MOREX.r2.1HG0046470,HORVU.MOREX.r2.1HG0064590,HORVU.MOREX.r2.3HG0191730,HORVU.MOREX.r2.3HG0252730,HORVU.MOREX.r2.4HG0331860,HORVU.MOREX.r2.3HG0209300,HORVU.MOREX.r2.1HG0056280,HORVU.MOREX.r2.1HG0047820,HORVU.MOREX.r2.1HG0047880,HORVU.MOR…	0.727156	0.814027	0.806909
156	42	140	14	13	HORVU.MOREX.r2.2HG0180770,HORVU.MOREX.r2.5HG0388620,HORVU.MOREX.r2.5HG0388970,HORVU.MOREX.r2.2HG0178910,HORVU.MOREX.r2.5HG0388740,HORVU.MOREX.r2.5HG0388420,HORVU.MOREX.r2.5HG0387650,HORVU.MOREX.r2.5HG0358200,HORVU.MOREX.r2.2HG0178800,HORVU.MOREX.r2.3HG0209440,HORVU.MOREX.r2.5HG0387850,HORVU.MOREX.r2.5HG0358170,HORVU.MOREX.r2.2HG0179230,HORVU.MOREX.r2.2HG0181050	HORVU.MOREX.r2.5HG0388870,HORVU.MOREX.r2.5HG0363570,HORVU.MOREX.r2.UnG0626650,HORVU.MOREX.r2.5HG0388530,HORVU.MOREX.r2.5HG0387390,HORVU.MOREX.r2.2HG0139700,HORVU.MOREX.r2.5HG0377130,HORVU.MOREX.r2.5HG0392680,HORVU.MOREX.r2.5HG0389260,HORVU.MOREX.r2.5HG0381770,HORVU.MOREX.r2.5HG0404190,HORVU.MOREX.r2.3HG0204480,HORVU.MOREX.r2.5HG0389290	HORVU.MOREX.r2.5HG0363570,HORVU.MOREX.r2.5HG0372070,HORVU.MOREX.r2.2HG0140640,HORVU.MOREX.r2.5HG0392680,HORVU.MOREX.r2.4HG0320400,HORVU.MOREX.r2.3HG0204480,HORVU.MOREX.r2.7HG0588800,HORVU.MOREX.r2.2HG0139700,HORVU.MOREX.r2.5HG0377130,HORVU.MOREX.r2.7HG0569950,HORVU.MOREX.r2.4HG0337230,HORVU.MOREX.r2.7HG0549420,HORVU.MOREX.r2.5HG0389290,HORVU.MOREX.r2.6HG0502070,HORVU.MOREX.r2.5HG0388870,HORVU.MOR…	0.736866	1.0962	0.807406
157	43	33	27	11	HORVU.MOREX.r2.7HG0543070,HORVU.MOREX.r2.2HG0178800,HORVU.MOREX.r2.2HG0179230,HORVU.MOREX.r2.5HG0436100,HORVU.MOREX.r2.7HG0560510,HORVU.MOREX.r2.5HG0435910,HORVU.MOREX.r2.2HG0178910,HORVU.MOREX.r2.2HG0174990,HORVU.MOREX.r2.5HG0436080,HORVU.MOREX.r2.5HG0435890,HORVU.MOREX.r2.4HG0316710,HORVU.MOREX.r2.5HG0436630,HORVU.MOREX.r2.5HG0436030,HORVU.MOREX.r2.3HG0212490,HORVU.MOREX.r2.7HG0559570,HORVU.MOR…	HORVU.MOREX.r2.7HG0560380,HORVU.MOREX.r2.2HG0090910,HORVU.MOREX.r2.7HG0595210,HORVU.MOREX.r2.1HG0061930,HORVU.MOREX.r2.5HG0436340,HORVU.MOREX.r2.7HG0532760,HORVU.MOREX.r2.6HG0503690,HORVU.MOREX.r2.2HG0109070,HORVU.MOREX.r2.7HG0579740,HORVU.MOREX.r2.2HG0175170,HORVU.MOREX.r2.7HG0580400	HORVU.MOREX.r2.2HG0136320,HORVU.MOREX.r2.4HG0278220,HORVU.MOREX.r2.7HG0617080,HORVU.MOREX.r2.1HG0061930,HORVU.MOREX.r2.5HG0436340,HORVU.MOREX.r2.7HG0595210,HORVU.MOREX.r2.3HG0245250,HORVU.MOREX.r2.2HG0114780,HORVU.MOREX.r2.6HG0482280,HORVU.MOREX.r2.3HG0251880,HORVU.MOREX.r2.3HG0238220,HORVU.MOREX.r2.1HG0028440,HORVU.MOREX.r2.7HG0582660,HORVU.MOREX.r2.1HG0003280,HORVU.MOREX.r2.4HG0323340,HORVU.MOR…	0.736993	0.839525	0.807406
158	46	76	12	12	HORVU.MOREX.r2.4HG0280240,HORVU.MOREX.r2.2HG0178910,HORVU.MOREX.r2.3HG0184030,HORVU.MOREX.r2.3HG0186730,HORVU.MOREX.r2.1HG0067900,HORVU.MOREX.r2.3HG0186990,HORVU.MOREX.r2.3HG0187150,HORVU.MOREX.r2.2HG0178800,HORVU.MOREX.r2.3HG0183340,HORVU.MOREX.r2.3HG0183880,HORVU.MOREX.r2.4HG0280200,HORVU.MOREX.r2.2HG0179230	HORVU.MOREX.r2.4HG0277890,HORVU.MOREX.r2.3HG0181760,HORVU.MOREX.r2.3HG0186910,HORVU.MOREX.r2.1HG0068480,HORVU.MOREX.r2.1HG0067910,HORVU.MOREX.r2.3HG0183440,HORVU.MOREX.r2.4HG0280220,HORVU.MOREX.r2.3HG0183490,HORVU.MOREX.r2.3HG0184390,HORVU.MOREX.r2.3HG0183680,HORVU.MOREX.r2.3HG0184480,HORVU.MOREX.r2.5HG0390220	HORVU.MOREX.r2.7HG0555160,HORVU.MOREX.r2.6HG0457050,HORVU.MOREX.r2.3HG0186910,HORVU.MOREX.r2.1HG0068480,HORVU.MOREX.r2.1HG0059320,HORVU.MOREX.r2.4HG0277890,HORVU.MOREX.r2.7HG0555210,HORVU.MOREX.r2.7HG0623590,HORVU.MOREX.r2.2HG0143010,HORVU.MOREX.r2.3HG0181760,HORVU.MOREX.r2.3HG0184480,HORVU.MOREX.r2.3HG0183440,HORVU.MOREX.r2.3HG0184390,HORVU.MOREX.r2.3HG0183680,HORVU.MOREX.r2.2HG0171540,HORVU.MOR…	0.746259	0.862034	0.812383
159	22	91	12	7	HORVU.MOREX.r2.7HG0529070,HORVU.MOREX.r2.7HG0527250,HORVU.MOREX.r2.2HG0178800,HORVU.MOREX.r2.7HG0528420,HORVU.MOREX.r2.7HG0527390,HORVU.MOREX.r2.2HG0178910,HORVU.MOREX.r2.7HG0527420,HORVU.MOREX.r2.7HG0527920,HORVU.MOREX.r2.7HG0528480,HORVU.MOREX.r2.7HG0527670,HORVU.MOREX.r2.2HG0179230,HORVU.MOREX.r2.7HG0528240	HORVU.MOREX.r2.7HG0527370,HORVU.MOREX.r2.7HG0528250,HORVU.MOREX.r2.7HG0527900,HORVU.MOREX.r2.7HG0527710,HORVU.MOREX.r2.1HG0020380,HORVU.MOREX.r2.7HG0527240,HORVU.MOREX.r2.7HG0530550	HORVU.MOREX.r2.7HG0527370,HORVU.MOREX.r2.7HG0527710,HORVU.MOREX.r2.7HG0527900,HORVU.MOREX.r2.2HG0147110,HORVU.MOREX.r2.2HG0149190,HORVU.MOREX.r2.7HG0528250,HORVU.MOREX.r2.1HG0020380,HORVU.MOREX.r2.2HG0085510,HORVU.MOREX.r2.2HG0112460,HORVU.MOREX.r2.7HG0530550,HORVU.MOREX.r2.7HG0527240	0.81483	1.14105	0.879215
160	23	111	11	7	HORVU.MOREX.r2.5HG0424820,HORVU.MOREX.r2.5HG0424830,HORVU.MOREX.r2.5HG0425570,HORVU.MOREX.r2.5HG0424740,HORVU.MOREX.r2.5HG0423680,HORVU.MOREX.r2.5HG0424570,HORVU.MOREX.r2.5HG0424020,HORVU.MOREX.r2.5HG0424260,HORVU.MOREX.r2.5HG0424900,HORVU.MOREX.r2.5HG0423510,HORVU.MOREX.r2.5HG0425200	HORVU.MOREX.r2.5HG0422080,HORVU.MOREX.r2.5HG0424810,HORVU.MOREX.r2.5HG0424310,HORVU.MOREX.r2.5HG0424790,HORVU.MOREX.r2.5HG0423380,HORVU.MOREX.r2.5HG0425220,HORVU.MOREX.r2.7HG0554390	HORVU.MOREX.r2.3HG0197850,HORVU.MOREX.r2.5HG0422080,HORVU.MOREX.r2.7HG0528970,HORVU.MOREX.r2.5HG0424810,HORVU.MOREX.r2.5HG0424310,HORVU.MOREX.r2.5HG0424790,HORVU.MOREX.r2.5HG0423380,HORVU.MOREX.r2.5HG0425220,HORVU.MOREX.r2.7HG0554390	0.822223	1.06956	0.879215
161	24	54	15	6	HORVU.MOREX.r2.2HG0101560,HORVU.MOREX.r2.2HG0178910,HORVU.MOREX.r2.2HG0101710,HORVU.MOREX.r2.2HG0101040,HORVU.MOREX.r2.2HG0099480,HORVU.MOREX.r2.2HG0102050,HORVU.MOREX.r2.2HG0179230,HORVU.MOREX.r2.2HG0101490,HORVU.MOREX.r2.2HG0102000,HORVU.MOREX.r2.7HG0615500,HORVU.MOREX.r2.2HG0178800,HORVU.MOREX.r2.2HG0101050,HORVU.MOREX.r2.2HG0101000,HORVU.MOREX.r2.2HG0099640,HORVU.MOREX.r2.2HG0099970	HORVU.MOREX.r2.7HG0558000,HORVU.MOREX.r2.2HG0101820,HORVU.MOREX.r2.7HG0622620,HORVU.MOREX.r2.2HG0102680,HORVU.MOREX.r2.2HG0101680,HORVU.MOREX.r2.2HG0103780	HORVU.MOREX.r2.4HG0333620,HORVU.MOREX.r2.4HG0347780,HORVU.MOREX.r2.2HG0102680,HORVU.MOREX.r2.7HG0615610,HORVU.MOREX.r2.7HG0622620,HORVU.MOREX.r2.2HG0101680,HORVU.MOREX.r2.7HG0558000,HORVU.MOREX.r2.1HG0059030,HORVU.MOREX.r2.5HG0396400,HORVU.MOREX.r2.2HG0101820,HORVU.MOREX.r2.2HG0103780,HORVU.MOREX.r2.3HG0253130	0.822987	0.814319	0.879215
162	29	52	10	9	HORVU.MOREX.r2.2HG0180770,HORVU.MOREX.r2.3HG0182360,HORVU.MOREX.r2.3HG0182040,HORVU.MOREX.r2.2HG0178910,HORVU.MOREX.r2.3HG0181630,HORVU.MOREX.r2.2HG0178800,HORVU.MOREX.r2.3HG0181430,HORVU.MOREX.r2.3HG0181420,HORVU.MOREX.r2.2HG0179230,HORVU.MOREX.r2.2HG0181050	HORVU.MOREX.r2.6HG0520560,HORVU.MOREX.r2.3HG0181440,HORVU.MOREX.r2.6HG0496180,HORVU.MOREX.r2.1HG0002190,HORVU.MOREX.r2.3HG0182460,HORVU.MOREX.r2.1HG0036120,HORVU.MOREX.r2.3HG0181540,HORVU.MOREX.r2.3HG0182170,HORVU.MOREX.r2.3HG0184150	HORVU.MOREX.r2.6HG0506610,HORVU.MOREX.r2.1HG0037750,HORVU.MOREX.r2.3HG0181540,HORVU.MOREX.r2.5HG0443800,HORVU.MOREX.r2.6HG0522620,HORVU.MOREX.r2.6HG0520560,HORVU.MOREX.r2.3HG0181440,HORVU.MOREX.r2.4HG0293090,HORVU.MOREX.r2.6HG0496180,HORVU.MOREX.r2.1HG0002190,HORVU.MOREX.r2.5HG0423550,HORVU.MOREX.r2.5HG0447340,HORVU.MOREX.r2.3HG0221800,HORVU.MOREX.r2.6HG0514450,HORVU.MOREX.r2.3HG0182460,HORVU.MOR…	0.838317	1.10028	0.890065
163	32	117	15	10	HORVU.MOREX.r2.2HG0085130,HORVU.MOREX.r2.2HG0178910,HORVU.MOREX.r2.2HG0085770,HORVU.MOREX.r2.3HG0181430,HORVU.MOREX.r2.2HG0085930,HORVU.MOREX.r2.2HG0085320,HORVU.MOREX.r2.3HG0182040,HORVU.MOREX.r2.2HG0084620,HORVU.MOREX.r2.2HG0085190,HORVU.MOREX.r2.2HG0178800,HORVU.MOREX.r2.2HG0085110,HORVU.MOREX.r2.2HG0085830,HORVU.MOREX.r2.3HG0181420,HORVU.MOREX.r2.2HG0179230,HORVU.MOREX.r2.3HG0182360	HORVU.MOREX.r2.2HG0087750,HORVU.MOREX.r2.2HG0086020,HORVU.MOREX.r2.1HG0000070,HORVU.MOREX.r2.2HG0085750,HORVU.MOREX.r2.2HG0122340,HORVU.MOREX.r2.2HG0085370,HORVU.MOREX.r2.2HG0086460,HORVU.MOREX.r2.2HG0085980,HORVU.MOREX.r2.3HG0181540,HORVU.MOREX.r2.2HG0086010	HORVU.MOREX.r2.2HG0087750,HORVU.MOREX.r2.4HG0329300,HORVU.MOREX.r2.2HG0180170,HORVU.MOREX.r2.4HG0322690,HORVU.MOREX.r2.2HG0086020,HORVU.MOREX.r2.1HG0000070,HORVU.MOREX.r2.4HG0312900,HORVU.MOREX.r2.3HG0252650,HORVU.MOREX.r2.4HG0319930,HORVU.MOREX.r2.2HG0122340,HORVU.MOREX.r2.2HG0085750,HORVU.MOREX.r2.3HG0235810,HORVU.MOREX.r2.2HG0085370,HORVU.MOREX.r2.1HG0070270,HORVU.MOREX.r2.6HG0521910,HORVU.MOR…	0.845473	1.11147	0.892156
164	34	61	9	9	HORVU.MOREX.r2.2HG0178910,HORVU.MOREX.r2.7HG0567710,HORVU.MOREX.r2.2HG0176000,HORVU.MOREX.r2.2HG0126790,HORVU.MOREX.r2.2HG0175600,HORVU.MOREX.r2.2HG0178800,HORVU.MOREX.r2.2HG0176780,HORVU.MOREX.r2.7HG0566960,HORVU.MOREX.r2.2HG0179230	HORVU.MOREX.r2.3HG0260790,HORVU.MOREX.r2.2HG0126300,HORVU.MOREX.r2.4HG0320870,HORVU.MOREX.r2.1HG0037190,HORVU.MOREX.r2.2HG0126360,HORVU.MOREX.r2.2HG0138830,HORVU.MOREX.r2.7HG0592090,HORVU.MOREX.r2.7HG0580730,HORVU.MOREX.r2.2HG0117650	HORVU.MOREX.r2.1HG0006050,HORVU.MOREX.r2.5HG0404270,HORVU.MOREX.r2.6HG0458690,HORVU.MOREX.r2.3HG0227930,HORVU.MOREX.r2.7HG0592090,HORVU.MOREX.r2.5HG0404230,HORVU.MOREX.r2.1HG0023650,HORVU.MOREX.r2.2HG0156660,HORVU.MOREX.r2.7HG0580730,HORVU.MOREX.r2.1HG0044540,HORVU.MOREX.r2.1HG0044460,HORVU.MOREX.r2.2HG0148310,HORVU.MOREX.r2.5HG0404200,HORVU.MOREX.r2.3HG0260790,HORVU.MOREX.r2.2HG0126300,HORVU.MOR…	0.851126	0.879512	0.892644
165	37	122	17	10	HORVU.MOREX.r2.5HG0444130,HORVU.MOREX.r2.2HG0161300,HORVU.MOREX.r2.3HG0249790,HORVU.MOREX.r2.3HG0250030,HORVU.MOREX.r2.3HG0262550,HORVU.MOREX.r2.2HG0161940,HORVU.MOREX.r2.2HG0161480,HORVU.MOREX.r2.2HG0162210,HORVU.MOREX.r2.5HG0444620,HORVU.MOREX.r2.2HG0160980,HORVU.MOREX.r2.3HG0249830,HORVU.MOREX.r2.5HG0444800,HORVU.MOREX.r2.5HG0444970,HORVU.MOREX.r2.3HG0250010,HORVU.MOREX.r2.5HG0444790,HORVU.MOR…	HORVU.MOREX.r2.5HG0444880,HORVU.MOREX.r2.2HG0160540,HORVU.MOREX.r2.3HG0260920,HORVU.MOREX.r2.5HG0447090,HORVU.MOREX.r2.3HG0248700,HORVU.MOREX.r2.3HG0249960,HORVU.MOREX.r2.2HG0165630,HORVU.MOREX.r2.2HG0162620,HORVU.MOREX.r2.2HG0161390,HORVU.MOREX.r2.5HG0444690	HORVU.MOREX.r2.3HG0220810,HORVU.MOREX.r2.2HG0165630,HORVU.MOREX.r2.5HG0443800,HORVU.MOREX.r2.5HG0361370,HORVU.MOREX.r2.3HG0260920,HORVU.MOREX.r2.7HG0561730,HORVU.MOREX.r2.3HG0248700,HORVU.MOREX.r2.3HG0249960,HORVU.MOREX.r2.7HG0575630,HORVU.MOREX.r2.5HG0444690,HORVU.MOREX.r2.2HG0171370,HORVU.MOREX.r2.3HG0200290,HORVU.MOREX.r2.2HG0162620,HORVU.MOREX.r2.5HG0444880,HORVU.MOREX.r2.5HG0385760,HORVU.MOR…	0.85804	0.904912	0.894441
166	46	272	34	14	HORVU.MOREX.r2.7HG0554980,HORVU.MOREX.r2.7HG0549760,HORVU.MOREX.r2.6HG0473330,HORVU.MOREX.r2.4HG0334360,HORVU.MOREX.r2.7HG0548380,HORVU.MOREX.r2.7HG0546180,HORVU.MOREX.r2.4HG0330020,HORVU.MOREX.r2.2HG0178800,HORVU.MOREX.r2.2HG0138140,HORVU.MOREX.r2.2HG0179230,HORVU.MOREX.r2.7HG0540280,HORVU.MOREX.r2.7HG0551080,HORVU.MOREX.r2.7HG0543000,HORVU.MOREX.r2.1HG0018760,HORVU.MOREX.r2.6HG0471520,HORVU.MOR…	HORVU.MOREX.r2.7HG0557610,HORVU.MOREX.r2.7HG0554650,HORVU.MOREX.r2.7HG0600860,HORVU.MOREX.r2.7HG0551480,HORVU.MOREX.r2.7HG0555740,HORVU.MOREX.r2.7HG0551140,HORVU.MOREX.r2.7HG0555000,HORVU.MOREX.r2.7HG0554110,HORVU.MOREX.r2.7HG0553750,HORVU.MOREX.r2.7HG0551130,HORVU.MOREX.r2.7HG0551420,HORVU.MOREX.r2.7HG0551930,HORVU.MOREX.r2.7HG0552170,HORVU.MOREX.r2.7HG0553130	HORVU.MOREX.r2.7HG0557610,HORVU.MOREX.r2.7HG0554650,HORVU.MOREX.r2.7HG0600860,HORVU.MOREX.r2.7HG0551480,HORVU.MOREX.r2.1HG0045500,HORVU.MOREX.r2.7HG0555740,HORVU.MOREX.r2.7HG0551140,HORVU.MOREX.r2.7HG0555000,HORVU.MOREX.r2.7HG0554110,HORVU.MOREX.r2.7HG0553750,HORVU.MOREX.r2.7HG0551130,HORVU.MOREX.r2.7HG0551420,HORVU.MOREX.r2.7HG0551930,HORVU.MOREX.r2.7HG0552170,HORVU.MOREX.r2.7HG0553130	0.870829	1.06975	0.902305
167	56	76	25	17	HORVU.MOREX.r2.5HG0447180,HORVU.MOREX.r2.2HG0178910,HORVU.MOREX.r2.2HG0106820,HORVU.MOREX.r2.5HG0446980,HORVU.MOREX.r2.2HG0178800,HORVU.MOREX.r2.2HG0179230,HORVU.MOREX.r2.1HG0064120,HORVU.MOREX.r2.5HG0446070,HORVU.MOREX.r2.2HG0176780,HORVU.MOREX.r2.2HG0175600,HORVU.MOREX.r2.4HG0316710,HORVU.MOREX.r2.3HG0212490,HORVU.MOREX.r2.1HG0064940,HORVU.MOREX.r2.2HG0090790,HORVU.MOREX.r2.1HG0064450,HORVU.MOR…	HORVU.MOREX.r2.5HG0446090,HORVU.MOREX.r2.7HG0605190,HORVU.MOREX.r2.5HG0447070,HORVU.MOREX.r2.5HG0447780,HORVU.MOREX.r2.5HG0447770,HORVU.MOREX.r2.5HG0445570,HORVU.MOREX.r2.5HG0444510,HORVU.MOREX.r2.1HG0064000,HORVU.MOREX.r2.6HG0456710,HORVU.MOREX.r2.5HG0445540,HORVU.MOREX.r2.5HG0445880,HORVU.MOREX.r2.4HG0289200,HORVU.MOREX.r2.2HG0090910,HORVU.MOREX.r2.2HG0092980,HORVU.MOREX.r2.5HG0382520,HORVU.MOR…	HORVU.MOREX.r2.5HG0371880,HORVU.MOREX.r2.5HG0445540,HORVU.MOREX.r2.1HG0073720,HORVU.MOREX.r2.5HG0444510,HORVU.MOREX.r2.5HG0445880,HORVU.MOREX.r2.5HG0430380,HORVU.MOREX.r2.3HG0198430,HORVU.MOREX.r2.6HG0490150,HORVU.MOREX.r2.UnG0625370,HORVU.MOREX.r2.5HG0446090,HORVU.MOREX.r2.5HG0447070,HORVU.MOREX.r2.6HG0456710,HORVU.MOREX.r2.1HG0064000,HORVU.MOREX.r2.4HG0299000,HORVU.MOREX.r2.3HG0243290,HORVU.MOR…	0.882646	1.06589	0.909073
168	22	43	10	6	HORVU.MOREX.r2.5HG0442600,HORVU.MOREX.r2.2HG0180770,HORVU.MOREX.r2.5HG0442950,HORVU.MOREX.r2.2HG0178910,HORVU.MOREX.r2.5HG0442970,HORVU.MOREX.r2.5HG0442930,HORVU.MOREX.r2.2HG0178800,HORVU.MOREX.r2.5HG0442820,HORVU.MOREX.r2.2HG0179230,HORVU.MOREX.r2.2HG0181050	HORVU.MOREX.r2.5HG0441530,HORVU.MOREX.r2.5HG0443570,HORVU.MOREX.r2.1HG0066380,HORVU.MOREX.r2.4HG0335590,HORVU.MOREX.r2.2HG0138840,HORVU.MOREX.r2.5HG0442380	HORVU.MOREX.r2.5HG0399850,HORVU.MOREX.r2.5HG0441530,HORVU.MOREX.r2.4HG0277520,HORVU.MOREX.r2.5HG0442380,HORVU.MOREX.r2.4HG0297130,HORVU.MOREX.r2.1HG0066380,HORVU.MOREX.r2.4HG0335590,HORVU.MOREX.r2.7HG0584210,HORVU.MOREX.r2.3HG0236450,HORVU.MOREX.r2.5HG0432650,HORVU.MOREX.r2.1HG0035540,HORVU.MOREX.r2.2HG0138840,HORVU.MOREX.r2.3HG0240730,HORVU.MOREX.r2.5HG0443570	1	0.916404	1
169	20	86	10	6	HORVU.MOREX.r2.2HG0180770,HORVU.MOREX.r2.3HG0192390,HORVU.MOREX.r2.3HG0192490,HORVU.MOREX.r2.3HG0192480,HORVU.MOREX.r2.3HG0192500,HORVU.MOREX.r2.3HG0192960,HORVU.MOREX.r2.3HG0193280,HORVU.MOREX.r2.2HG0181050,HORVU.MOREX.r2.3HG0193910,HORVU.MOREX.r2.3HG0193340	HORVU.MOREX.r2.3HG0193310,HORVU.MOREX.r2.1HG0023250,HORVU.MOREX.r2.3HG0192360,HORVU.MOREX.r2.3HG0193960,HORVU.MOREX.r2.3HG0192470,HORVU.MOREX.r2.4HG0333940	HORVU.MOREX.r2.3HG0193310,HORVU.MOREX.r2.4HG0347890,HORVU.MOREX.r2.1HG0023250,HORVU.MOREX.r2.3HG0192360,HORVU.MOREX.r2.3HG0193960,HORVU.MOREX.r2.3HG0192470,HORVU.MOREX.r2.4HG0333940,HORVU.MOREX.r2.7HG0584830,HORVU.MOREX.r2.1HG0072060,HORVU.MOREX.r2.1HG0071840	1	1.04766	1
170	29	49	12	8	HORVU.MOREX.r2.2HG0180770,HORVU.MOREX.r2.7HG0553840,HORVU.MOREX.r2.7HG0554850,HORVU.MOREX.r2.2HG0178910,HORVU.MOREX.r2.7HG0554060,HORVU.MOREX.r2.7HG0552160,HORVU.MOREX.r2.7HG0551080,HORVU.MOREX.r2.2HG0178800,HORVU.MOREX.r2.7HG0553740,HORVU.MOREX.r2.7HG0552580,HORVU.MOREX.r2.2HG0179230,HORVU.MOREX.r2.2HG0181050	HORVU.MOREX.r2.2HG0088020,HORVU.MOREX.r2.2HG0096210,HORVU.MOREX.r2.7HG0551130,HORVU.MOREX.r2.4HG0319700,HORVU.MOREX.r2.4HG0286260,HORVU.MOREX.r2.1HG0032940,HORVU.MOREX.r2.2HG0169770,HORVU.MOREX.r2.7HG0582550	HORVU.MOREX.r2.2HG0136670,HORVU.MOREX.r2.4HG0325400,HORVU.MOREX.r2.2HG0161670,HORVU.MOREX.r2.7HG0551130,HORVU.MOREX.r2.2HG0135150,HORVU.MOREX.r2.1HG0066050,HORVU.MOREX.r2.6HG0511220,HORVU.MOREX.r2.3HG0221240,HORVU.MOREX.r2.2HG0169770,HORVU.MOREX.r2.5HG0386390,HORVU.MOREX.r2.2HG0088020,HORVU.MOREX.r2.2HG0096210,HORVU.MOREX.r2.2HG0140700,HORVU.MOREX.r2.4HG0319700,HORVU.MOREX.r2.4HG0295830,HORVU.MOR…	1	0.930934	1
171	61	138	27	18	HORVU.MOREX.r2.4HG0276810,HORVU.MOREX.r2.4HG0276030,HORVU.MOREX.r2.2HG0091410,HORVU.MOREX.r2.2HG0178800,HORVU.MOREX.r2.2HG0179230,HORVU.MOREX.r2.4HG0276340,HORVU.MOREX.r2.4HG0276080,HORVU.MOREX.r2.4HG0345920,HORVU.MOREX.r2.5HG0437790,HORVU.MOREX.r2.2HG0178910,HORVU.MOREX.r2.4HG0344720,HORVU.MOREX.r2.4HG0341690,HORVU.MOREX.r2.4HG0327350,HORVU.MOREX.r2.5HG0438170,HORVU.MOREX.r2.1HG0014470,HORVU.MOR…	HORVU.MOREX.r2.5HG0437960,HORVU.MOREX.r2.3HG0200630,HORVU.MOREX.r2.4HG0276100,HORVU.MOREX.r2.1HG0021340,HORVU.MOREX.r2.6HG0449180,HORVU.MOREX.r2.7HG0527200,HORVU.MOREX.r2.6HG0449390,HORVU.MOREX.r2.4HG0344710,HORVU.MOREX.r2.4HG0276780,HORVU.MOREX.r2.6HG0448700,HORVU.MOREX.r2.4HG0344780,HORVU.MOREX.r2.4HG0346950,HORVU.MOREX.r2.4HG0276700,HORVU.MOREX.r2.4HG0276240,HORVU.MOREX.r2.2HG0091430,HORVU.MOR…	HORVU.MOREX.r2.5HG0437960,HORVU.MOREX.r2.1HG0021340,HORVU.MOREX.r2.2HG0082260,HORVU.MOREX.r2.3HG0194870,HORVU.MOREX.r2.4HG0276780,HORVU.MOREX.r2.4HG0276700,HORVU.MOREX.r2.2HG0129100,HORVU.MOREX.r2.4HG0295090,HORVU.MOREX.r2.4HG0277250,HORVU.MOREX.r2.4HG0276100,HORVU.MOREX.r2.3HG0192010,HORVU.MOREX.r2.3HG0200630,HORVU.MOREX.r2.7HG0527200,HORVU.MOREX.r2.6HG0490990,HORVU.MOREX.r2.2HG0091450,HORVU.MOR…	1	1.02335	1
172	31	71	14	9	HORVU.MOREX.r2.6HG0451050,HORVU.MOREX.r2.5HG0412310,HORVU.MOREX.r2.5HG0412560,HORVU.MOREX.r2.5HG0412730,HORVU.MOREX.r2.6HG0450700,HORVU.MOREX.r2.6HG0451570,HORVU.MOREX.r2.1HG0046280,HORVU.MOREX.r2.5HG0412370,HORVU.MOREX.r2.5HG0412940,HORVU.MOREX.r2.6HG0451070,HORVU.MOREX.r2.5HG0412170,HORVU.MOREX.r2.5HG0412380,HORVU.MOREX.r2.5HG0411930,HORVU.MOREX.r2.6HG0450740	HORVU.MOREX.r2.6HG0449730,HORVU.MOREX.r2.1HG0046300,HORVU.MOREX.r2.6HG0450840,HORVU.MOREX.r2.6HG0450400,HORVU.MOREX.r2.6HG0452130,HORVU.MOREX.r2.6HG0450830,HORVU.MOREX.r2.6HG0453770,HORVU.MOREX.r2.5HG0412410,HORVU.MOREX.r2.6HG0451220	HORVU.MOREX.r2.1HG0046300,HORVU.MOREX.r2.2HG0149440,HORVU.MOREX.r2.6HG0450400,HORVU.MOREX.r2.5HG0433500,HORVU.MOREX.r2.1HG0034750,HORVU.MOREX.r2.6HG0452130,HORVU.MOREX.r2.5HG0394640,HORVU.MOREX.r2.6HG0450830,HORVU.MOREX.r2.7HG0554710,HORVU.MOREX.r2.2HG0098010,HORVU.MOREX.r2.4HG0346740,HORVU.MOREX.r2.4HG0308280,HORVU.MOREX.r2.6HG0511470,HORVU.MOREX.r2.3HG0211860,HORVU.MOREX.r2.7HG0544410,HORVU.MOR…	1	0.999928	1

## Sheet: Disease modules 32HAI
Label	module_nodes_count	module_edges_count	Density	Bgh_SNP_count	Bgh_eGene_count	Bgh_SNP	Bgh_eGene	gene	p-value	oddsratio	FDR
1	1901	5622	0	101	1686	HORVU.MOREX.r2.7HG0549330,HORVU.MOREX.r2.4HG0291260,HORVU.MOREX.r2.4HG0279310,HORVU.MOREX.r2.7HG0541620,HORVU.MOREX.r2.2HG0175120,HORVU.MOREX.r2.1HG0075910,HORVU.MOREX.r2.2HG0152600,HORVU.MOREX.r2.6HG0513640,HORVU.MOREX.r2.3HG0254040,HORVU.MOREX.r2.3HG0249830,HORVU.MOREX.r2.4HG0344720,HORVU.MOREX.r2.5HG0350990,HORVU.MOREX.r2.1HG0004200,HORVU.MOREX.r2.2HG0152450,HORVU.MOREX.r2.4HG0346910,HORVU.MOR…	HORVU.MOREX.r2.3HG0211850,HORVU.MOREX.r2.3HG0206440,HORVU.MOREX.r2.6HG0472520,HORVU.MOREX.r2.1HG0035260,HORVU.MOREX.r2.2HG0090320,HORVU.MOREX.r2.4HG0283660,HORVU.MOREX.r2.7HG0535390,HORVU.MOREX.r2.2HG0178250,HORVU.MOREX.r2.5HG0383520,HORVU.MOREX.r2.4HG027	HORVU.MOREX.r2.3HG0211850,HORVU.MOREX.r2.3HG0206440,HORVU.MOREX.r2.6HG0472520,HORVU.MOREX.r2.1HG0035260,HORVU.MOREX.r2.2HG0090320,HORVU.MOREX.r2.4HG0283660,HORVU.MOREX.r2.7HG0535390,HORVU.MOREX.r2.2HG0178250,HORVU.MOREX.r2.5HG0383520,HORVU.MOREX.r2.4HG027	0	12.2668	0
2	433	494	0	31	356	HORVU.MOREX.r2.2HG0097010,HORVU.MOREX.r2.2HG0150540,HORVU.MOREX.r2.3HG0244180,HORVU.MOREX.r2.5HG0353950,HORVU.MOREX.r2.3HG0268390,HORVU.MOREX.r2.7HG0608850,HORVU.MOREX.r2.1HG0078080,HORVU.MOREX.r2.3HG0268400,HORVU.MOREX.r2.4HG0280240,HORVU.MOREX.r2.2HG0095700,HORVU.MOREX.r2.4HG0289920,HORVU.MOREX.r2.1HG0003750,HORVU.MOREX.r2.1HG0001030,HORVU.MOREX.r2.3HG0186560,HORVU.MOREX.r2.2HG0096030,HORVU.MOR…	HORVU.MOREX.r2.2HG0121020,HORVU.MOREX.r2.1HG0054550,HORVU.MOREX.r2.7HG0559560,HORVU.MOREX.r2.3HG0232630,HORVU.MOREX.r2.4HG0279360,HORVU.MOREX.r2.3HG0227720,HORVU.MOREX.r2.1HG0041820,HORVU.MOREX.r2.6HG0521890,HORVU.MOREX.r2.4HG0280480,HORVU.MOREX.r2.2HG0098970,HORVU.MOREX.r2.6HG0491980,HORVU.MOREX.r2.3HG0259610,HORVU.MOREX.r2.1HG0042050,HORVU.MOREX.r2.6HG0464760,HORVU.MOREX.r2.6HG0502610,HORVU.MOR…	HORVU.MOREX.r2.2HG0121020,HORVU.MOREX.r2.4HG0279490,HORVU.MOREX.r2.3HG0241460,HORVU.MOREX.r2.1HG0054550,HORVU.MOREX.r2.7HG0559560,HORVU.MOREX.r2.3HG0232630,HORVU.MOREX.r2.4HG0279360,HORVU.MOREX.r2.3HG0227720,HORVU.MOREX.r2.3HG0252040,HORVU.MOREX.r2.7HG0538080,HORVU.MOREX.r2.2HG0091450,HORVU.MOREX.r2.1HG0041820,HORVU.MOREX.r2.5HG0390480,HORVU.MOREX.r2.4HG0280480,HORVU.MOREX.r2.2HG0098970,HORVU.MOR…	1.37438e-49	5.20313	1.42249e-47
3	470	2651	0	79	80	HORVU.MOREX.r2.3HG0259240,HORVU.MOREX.r2.2HG0136120,HORVU.MOREX.r2.1HG0073610,HORVU.MOREX.r2.5HG0404560,HORVU.MOREX.r2.2HG0136610,HORVU.MOREX.r2.7HG0589750,HORVU.MOREX.r2.4HG0291260,HORVU.MOREX.r2.2HG0123500,HORVU.MOREX.r2.3HG0192480,HORVU.MOREX.r2.2HG0136750,HORVU.MOREX.r2.3HG0274770,HORVU.MOREX.r2.7HG0531920,HORVU.MOREX.r2.3HG0274800,HORVU.MOREX.r2.6HG0456130,HORVU.MOREX.r2.7HG0591580,HORVU.MOR…	HORVU.MOREX.r2.1HG0053940,HORVU.MOREX.r2.4HG0280520,HORVU.MOREX.r2.5HG0411610,HORVU.MOREX.r2.4HG0277460,HORVU.MOREX.r2.7HG0614750,HORVU.MOREX.r2.2HG0089930,HORVU.MOREX.r2.1HG0020140,HORVU.MOREX.r2.7HG0529250,HORVU.MOREX.r2.2HG0117650,HORVU.MOREX.r2.5HG0441500,HORVU.MOREX.r2.1HG0057670,HORVU.MOREX.r2.1HG0061230,HORVU.MOREX.r2.2HG0142800,HORVU.MOREX.r2.3HG0251160,HORVU.MOREX.r2.3HG0240960,HORVU.MOR…	HORVU.MOREX.r2.6HG0459740,HORVU.MOREX.r2.2HG0178310,HORVU.MOREX.r2.5HG0386430,HORVU.MOREX.r2.3HG0265990,HORVU.MOREX.r2.6HG0468110,HORVU.MOREX.r2.1HG0042180,HORVU.MOREX.r2.3HG0253580,HORVU.MOREX.r2.7HG0609260,HORVU.MOREX.r2.2HG0108430,HORVU.MOREX.r2.1HG0026570,HORVU.MOREX.r2.7HG0593840,HORVU.MOREX.r2.7HG0552150,HORVU.MOREX.r2.2HG0082640,HORVU.MOREX.r2.7HG0609860,HORVU.MOREX.r2.4HG0281540,HORVU.MOR…	2.05251e-48	0.203645	1.41623e-46
4	247	2400	0	39	32	HORVU.MOREX.r2.5HG0398040,HORVU.MOREX.r2.5HG0350790,HORVU.MOREX.r2.5HG0447510,HORVU.MOREX.r2.5HG0397220,HORVU.MOREX.r2.5HG0398060,HORVU.MOREX.r2.4HG0291260,HORVU.MOREX.r2.5HG0350450,HORVU.MOREX.r2.3HG0274770,HORVU.MOREX.r2.5HG0446980,HORVU.MOREX.r2.2HG0152600,HORVU.MOREX.r2.1HG0001710,HORVU.MOREX.r2.1HG0002560,HORVU.MOREX.r2.5HG0396840,HORVU.MOREX.r2.1HG0003750,HORVU.MOREX.r2.1HG0001030,HORVU.MOR…	HORVU.MOREX.r2.2HG0126990,HORVU.MOREX.r2.7HG0603930,HORVU.MOREX.r2.5HG0393330,HORVU.MOREX.r2.4HG0337780,HORVU.MOREX.r2.2HG0158090,HORVU.MOREX.r2.4HG0282540,HORVU.MOREX.r2.6HG0486870,HORVU.MOREX.r2.7HG0613400,HORVU.MOREX.r2.5HG0393010,HORVU.MOREX.r2.2HG0126960,HORVU.MOREX.r2.3HG0274980,HORVU.MOREX.r2.5HG0354550,HORVU.MOREX.r2.6HG0476720,HORVU.MOREX.r2.3HG0236630,HORVU.MOREX.r2.2HG0088830,HORVU.MOR…	HORVU.MOREX.r2.7HG0603930,HORVU.MOREX.r2.5HG0426350,HORVU.MOREX.r2.5HG0386430,HORVU.MOREX.r2.4HG0337780,HORVU.MOREX.r2.3HG0246390,HORVU.MOREX.r2.2HG0080060,HORVU.MOREX.r2.7HG0559160,HORVU.MOREX.r2.6HG0483230,HORVU.MOREX.r2.5HG0439340,HORVU.MOREX.r2.2HG0096300,HORVU.MOREX.r2.7HG0593260,HORVU.MOREX.r2.6HG0483210,HORVU.MOREX.r2.4HG0281220,HORVU.MOREX.r2.5HG0387970,HORVU.MOREX.r2.1HG0056620,HORVU.MOR…	3.76403e-33	0.151751	1.94789e-31
5	219	431	0	22	33	HORVU.MOREX.r2.7HG0615630,HORVU.MOREX.r2.5HG0412560,HORVU.MOREX.r2.6HG0464080,HORVU.MOREX.r2.5HG0412940,HORVU.MOREX.r2.7HG0617000,HORVU.MOREX.r2.7HG0617100,HORVU.MOREX.r2.1HG0003750,HORVU.MOREX.r2.1HG0001030,HORVU.MOREX.r2.7HG0615910,HORVU.MOREX.r2.1HG0003500,HORVU.MOREX.r2.5HG0412380,HORVU.MOREX.r2.1HG0003400,HORVU.MOREX.r2.5HG0412170,HORVU.MOREX.r2.5HG0412310,HORVU.MOREX.r2.3HG0239860,HORVU.MOR…	HORVU.MOREX.r2.1HG0015100,HORVU.MOREX.r2.3HG0240850,HORVU.MOREX.r2.3HG0207310,HORVU.MOREX.r2.3HG0239480,HORVU.MOREX.r2.2HG0096630,HORVU.MOREX.r2.2HG0143320,HORVU.MOREX.r2.3HG0239890,HORVU.MOREX.r2.5HG0413530,HORVU.MOREX.r2.2HG0174120,HORVU.MOREX.r2.6HG0496750,HORVU.MOREX.r2.5HG0359080,HORVU.MOREX.r2.1HG0027190,HORVU.MOREX.r2.2HG0107970,HORVU.MOREX.r2.3HG0241140,HORVU.MOREX.r2.3HG0239380,HORVU.MOR…	HORVU.MOREX.r2.4HG0319540,HORVU.MOREX.r2.4HG0323110,HORVU.MOREX.r2.1HG0015100,HORVU.MOREX.r2.6HG0457980,HORVU.MOREX.r2.6HG0500390,HORVU.MOREX.r2.5HG0392960,HORVU.MOREX.r2.2HG0107970,HORVU.MOREX.r2.4HG0339840,HORVU.MOREX.r2.6HG0496750,HORVU.MOREX.r2.5HG0412700,HORVU.MOREX.r2.1HG0027190,HORVU.MOREX.r2.3HG0272870,HORVU.MOREX.r2.6HG0471620,HORVU.MOREX.r2.3HG0241140,HORVU.MOREX.r2.6HG0488950,HORVU.MOR…	9.21034e-26	0.182015	3.81308e-24
6	660	633	0	153	196	HORVU.MOREX.r2.3HG0210420,HORVU.MOREX.r2.5HG0426980,HORVU.MOREX.r2.5HG0406340,HORVU.MOREX.r2.4HG0291260,HORVU.MOREX.r2.3HG0209090,HORVU.MOREX.r2.7HG0531920,HORVU.MOREX.r2.1HG0078540,HORVU.MOREX.r2.5HG0422650,HORVU.MOREX.r2.3HG0192960,HORVU.MOREX.r2.3HG0229390,HORVU.MOREX.r2.3HG0256230,HORVU.MOREX.r2.3HG0226630,HORVU.MOREX.r2.3HG0193280,HORVU.MOREX.r2.1HG0004200,HORVU.MOREX.r2.3HG0193910,HORVU.MOR…	HORVU.MOREX.r2.5HG0386630,HORVU.MOREX.r2.7HG0606560,HORVU.MOREX.r2.6HG0462060,HORVU.MOREX.r2.7HG0617910,HORVU.MOREX.r2.5HG0406220,HORVU.MOREX.r2.1HG0053940,HORVU.MOREX.r2.2HG0098800,HORVU.MOREX.r2.2HG0110770,HORVU.MOREX.r2.4HG0298180,HORVU.MOREX.r2.7HG0593100,HORVU.MOREX.r2.4HG0296890,HORVU.MOREX.r2.4HG0331930,HORVU.MOREX.r2.4HG0334150,HORVU.MOREX.r2.7HG0605160,HORVU.MOREX.r2.5HG0355940,HORVU.MOR…	HORVU.MOREX.r2.6HG0464060,HORVU.MOREX.r2.4HG0326110,HORVU.MOREX.r2.7HG0606560,HORVU.MOREX.r2.7HG0621090,HORVU.MOREX.r2.4HG0284720,HORVU.MOREX.r2.4HG0298180,HORVU.MOREX.r2.3HG0252690,HORVU.MOREX.r2.4HG0276750,HORVU.MOREX.r2.7HG0605160,HORVU.MOREX.r2.UnG0626220,HORVU.MOREX.r2.2HG0111000,HORVU.MOREX.r2.3HG0201650,HORVU.MOREX.r2.3HG0238770,HORVU.MOREX.r2.UnG0627650,HORVU.MOREX.r2.2HG0160140,HORVU.MOR…	2.13688e-24	0.423151	7.37224e-23
7	132	151	0	10	118	HORVU.MOREX.r2.7HG0611270,HORVU.MOREX.r2.7HG0611300,HORVU.MOREX.r2.1HG0001030,HORVU.MOREX.r2.7HG0612250,HORVU.MOREX.r2.4HG0343600,HORVU.MOREX.r2.7HG0611660,HORVU.MOREX.r2.7HG0612060,HORVU.MOREX.r2.1HG0003750,HORVU.MOREX.r2.7HG0611240,HORVU.MOREX.r2.7HG0612170	HORVU.MOREX.r2.2HG0131440,HORVU.MOREX.r2.1HG0044490,HORVU.MOREX.r2.3HG0216920,HORVU.MOREX.r2.3HG0183740,HORVU.MOREX.r2.5HG0431830,HORVU.MOREX.r2.3HG0248820,HORVU.MOREX.r2.5HG0408040,HORVU.MOREX.r2.1HG0043860,HORVU.MOREX.r2.4HG0313740,HORVU.MOREX.r2.6HG0469370,HORVU.MOREX.r2.6HG0449910,HORVU.MOREX.r2.1HG0041630,HORVU.MOREX.r2.3HG0226720,HORVU.MOREX.r2.5HG0421910,HORVU.MOREX.r2.4HG0277670,HORVU.MOR…	HORVU.MOREX.r2.2HG0131440,HORVU.MOREX.r2.1HG0044490,HORVU.MOREX.r2.3HG0216920,HORVU.MOREX.r2.3HG0183740,HORVU.MOREX.r2.5HG0431830,HORVU.MOREX.r2.3HG0248820,HORVU.MOREX.r2.5HG0408040,HORVU.MOREX.r2.1HG0043860,HORVU.MOREX.r2.4HG0313740,HORVU.MOREX.r2.6HG0469370,HORVU.MOREX.r2.6HG0449910,HORVU.MOREX.r2.1HG0041630,HORVU.MOREX.r2.3HG0195580,HORVU.MOREX.r2.3HG0226720,HORVU.MOREX.r2.5HG0421910,HORVU.MOR…	2.42032e-23	9.11529	7.15723e-22
8	83	116	0	5	2	HORVU.MOREX.r2.7HG0565310,HORVU.MOREX.r2.1HG0003070,HORVU.MOREX.r2.1HG0003500,HORVU.MOREX.r2.1HG0003400,HORVU.MOREX.r2.7HG0562310	HORVU.MOREX.r2.7HG0564200,HORVU.MOREX.r2.7HG0563600	HORVU.MOREX.r2.4HG0292190,HORVU.MOREX.r2.4HG0346770,HORVU.MOREX.r2.5HG0412480,HORVU.MOREX.r2.4HG0318550,HORVU.MOREX.r2.2HG0156270,HORVU.MOREX.r2.6HG0459060,HORVU.MOREX.r2.3HG0257030,HORVU.MOREX.r2.6HG0461750,HORVU.MOREX.r2.6HG0514370,HORVU.MOREX.r2.2HG0161930,HORVU.MOREX.r2.4HG0339910,HORVU.MOREX.r2.4HG0311740,HORVU.MOREX.r2.2HG0110340,HORVU.MOREX.r2.5HG0431380,HORVU.MOREX.r2.7HG0602600,HORVU.MOR…	3.17858e-21	0.025709	8.22458e-20
9	236	1492	0	32	182	HORVU.MOREX.r2.7HG0604260,HORVU.MOREX.r2.7HG0604610,HORVU.MOREX.r2.7HG0533530,HORVU.MOREX.r2.4HG0291260,HORVU.MOREX.r2.7HG0604570,HORVU.MOREX.r2.6HG0448750,HORVU.MOREX.r2.7HG0582650,HORVU.MOREX.r2.1HG0001710,HORVU.MOREX.r2.6HG0448980,HORVU.MOREX.r2.1HG0002560,HORVU.MOREX.r2.1HG0003750,HORVU.MOREX.r2.1HG0001030,HORVU.MOREX.r2.1HG0005040,HORVU.MOREX.r2.7HG0582310,HORVU.MOREX.r2.1HG0003500,HORVU.MOR…	HORVU.MOREX.r2.6HG0462060,HORVU.MOREX.r2.7HG0533270,HORVU.MOREX.r2.2HG0153330,HORVU.MOREX.r2.3HG0253340,HORVU.MOREX.r2.2HG0116650,HORVU.MOREX.r2.5HG0368930,HORVU.MOREX.r2.3HG0207770,HORVU.MOREX.r2.7HG0555330,HORVU.MOREX.r2.4HG0340800,HORVU.MOREX.r2.6HG0458340,HORVU.MOREX.r2.2HG0110830,HORVU.MOREX.r2.4HG0284390,HORVU.MOREX.r2.1HG0032080,HORVU.MOREX.r2.2HG0106250,HORVU.MOREX.r2.2HG0147940,HORVU.MOR…	HORVU.MOREX.r2.7HG0607670,HORVU.MOREX.r2.6HG0462060,HORVU.MOREX.r2.7HG0533270,HORVU.MOREX.r2.7HG0575810,HORVU.MOREX.r2.5HG0421980,HORVU.MOREX.r2.3HG0253340,HORVU.MOREX.r2.2HG0116650,HORVU.MOREX.r2.5HG0368930,HORVU.MOREX.r2.1HG0018510,HORVU.MOREX.r2.1HG0061440,HORVU.MOREX.r2.4HG0340800,HORVU.MOREX.r2.6HG0458340,HORVU.MOREX.r2.2HG0110830,HORVU.MOREX.r2.4HG0284390,HORVU.MOREX.r2.1HG0032080,HORVU.MOR…	1.85961e-19	3.66638	4.2771e-18
10	114	546	0	36	11	HORVU.MOREX.r2.5HG0384030,HORVU.MOREX.r2.2HG0172070,HORVU.MOREX.r2.5HG0384050,HORVU.MOREX.r2.5HG0374410,HORVU.MOREX.r2.5HG0366280,HORVU.MOREX.r2.5HG0375540,HORVU.MOREX.r2.5HG0381870,HORVU.MOREX.r2.5HG0381090,HORVU.MOREX.r2.5HG0382660,HORVU.MOREX.r2.5HG0384070,HORVU.MOREX.r2.2HG0171620,HORVU.MOREX.r2.5HG0384340,HORVU.MOREX.r2.2HG0172410,HORVU.MOREX.r2.5HG0368540,HORVU.MOREX.r2.1HG0003500,HORVU.MOR…	HORVU.MOREX.r2.1HG0061820,HORVU.MOREX.r2.3HG0213340,HORVU.MOREX.r2.4HG0297010,HORVU.MOREX.r2.1HG0011100,HORVU.MOREX.r2.1HG0075440,HORVU.MOREX.r2.6HG0475350,HORVU.MOREX.r2.2HG0171440,HORVU.MOREX.r2.2HG0133090,HORVU.MOREX.r2.6HG0465890,HORVU.MOREX.r2.5HG0358040,HORVU.MOREX.r2.5HG0377400	HORVU.MOREX.r2.2HG0159290,HORVU.MOREX.r2.3HG0197780,HORVU.MOREX.r2.2HG0180540,HORVU.MOREX.r2.2HG0092760,HORVU.MOREX.r2.6HG0490880,HORVU.MOREX.r2.7HG0552850,HORVU.MOREX.r2.1HG0020750,HORVU.MOREX.r2.4HG0325570,HORVU.MOREX.r2.4HG0317200,HORVU.MOREX.r2.6HG0511470,HORVU.MOREX.r2.2HG0106020,HORVU.MOREX.r2.5HG0416670,HORVU.MOREX.r2.3HG0220700,HORVU.MOREX.r2.4HG0305230,HORVU.MOREX.r2.2HG0146440,HORVU.MOR…	4.19725e-19	0.110915	8.6883e-18
11	91	76	0	7	8	HORVU.MOREX.r2.1HG0063560,HORVU.MOREX.r2.2HG0147600,HORVU.MOREX.r2.7HG0547400,HORVU.MOREX.r2.1HG0003070,HORVU.MOREX.r2.1HG0003500,HORVU.MOREX.r2.3HG0244480,HORVU.MOREX.r2.1HG0003400	HORVU.MOREX.r2.2HG0146710,HORVU.MOREX.r2.1HG0063650,HORVU.MOREX.r2.2HG0143010,HORVU.MOREX.r2.3HG0244690,HORVU.MOREX.r2.7HG0553130,HORVU.MOREX.r2.1HG0064250,HORVU.MOREX.r2.1HG0066320,HORVU.MOREX.r2.3HG0221330	HORVU.MOREX.r2.7HG0555160,HORVU.MOREX.r2.2HG0146710,HORVU.MOREX.r2.1HG0063650,HORVU.MOREX.r2.7HG0538690,HORVU.MOREX.r2.6HG0457050,HORVU.MOREX.r2.2HG0107840,HORVU.MOREX.r2.7HG0612270,HORVU.MOREX.r2.5HG0443670,HORVU.MOREX.r2.2HG0167780,HORVU.MOREX.r2.5HG0401830,HORVU.MOREX.r2.7HG0553130,HORVU.MOREX.r2.2HG0105120,HORVU.MOREX.r2.3HG0183870,HORVU.MOREX.r2.7HG0555210,HORVU.MOREX.r2.3HG0221330,HORVU.MOR…	2.63773e-16	0.100444	4.96374e-15
12	60	74	0	7	2	HORVU.MOREX.r2.4HG0291260,HORVU.MOREX.r2.1HG0002560,HORVU.MOREX.r2.1HG0002570,HORVU.MOREX.r2.1HG0003750,HORVU.MOREX.r2.1HG0001750,HORVU.MOREX.r2.1HG0002180,HORVU.MOREX.r2.1HG0001710	HORVU.MOREX.r2.4HG0341470,HORVU.MOREX.r2.4HG0324210	HORVU.MOREX.r2.4HG0292190,HORVU.MOREX.r2.1HG0041140,HORVU.MOREX.r2.4HG0326090,HORVU.MOREX.r2.2HG0085920,HORVU.MOREX.r2.7HG0541840,HORVU.MOREX.r2.4HG0325420,HORVU.MOREX.r2.4HG0290970,HORVU.MOREX.r2.5HG0432220,HORVU.MOREX.r2.3HG0254270,HORVU.MOREX.r2.3HG0203860,HORVU.MOREX.r2.5HG0349480,HORVU.MOREX.r2.4HG0319220,HORVU.MOREX.r2.1HG0006360,HORVU.MOREX.r2.3HG0212850,HORVU.MOREX.r2.5HG0376280,HORVU.MOR…	1.21737e-14	0.0360698	2.09997e-13
13	89	61	0	36	10	HORVU.MOREX.r2.5HG0384030,HORVU.MOREX.r2.5HG0384050,HORVU.MOREX.r2.5HG0374410,HORVU.MOREX.r2.5HG0366280,HORVU.MOREX.r2.5HG0375540,HORVU.MOREX.r2.5HG0381870,HORVU.MOREX.r2.6HG0452230,HORVU.MOREX.r2.5HG0382660,HORVU.MOREX.r2.5HG0384070,HORVU.MOREX.r2.1HG0001030,HORVU.MOREX.r2.5HG0384340,HORVU.MOREX.r2.5HG0368540,HORVU.MOREX.r2.6HG0452760,HORVU.MOREX.r2.1HG0003500,HORVU.MOREX.r2.1HG0078080,HORVU.MOR…	HORVU.MOREX.r2.6HG0514250,HORVU.MOREX.r2.4HG0309820,HORVU.MOREX.r2.1HG0062930,HORVU.MOREX.r2.2HG0130220,HORVU.MOREX.r2.5HG0398910,HORVU.MOREX.r2.6HG0450840,HORVU.MOREX.r2.6HG0452130,HORVU.MOREX.r2.5HG0443410,HORVU.MOREX.r2.5HG0379850,HORVU.MOREX.r2.1HG0052750	HORVU.MOREX.r2.4HG0319540,HORVU.MOREX.r2.7HG0557450,HORVU.MOREX.r2.5HG0412480,HORVU.MOREX.r2.3HG0251820,HORVU.MOREX.r2.3HG0199180,HORVU.MOREX.r2.2HG0109000,HORVU.MOREX.r2.3HG0240310,HORVU.MOREX.r2.7HG0541920,HORVU.MOREX.r2.3HG0256830,HORVU.MOREX.r2.2HG0130220,HORVU.MOREX.r2.4HG0289970,HORVU.MOREX.r2.2HG0161930,HORVU.MOREX.r2.5HG0431970,HORVU.MOREX.r2.6HG0490750,HORVU.MOREX.r2.7HG0598400,HORVU.MOR…	5.8299e-14	0.132073	9.283e-13
14	230	5322	0	57	59	HORVU.MOREX.r2.3HG0269970,HORVU.MOREX.r2.3HG0270250,HORVU.MOREX.r2.5HG0424830,HORVU.MOREX.r2.5HG0409860,HORVU.MOREX.r2.1HG0075930,HORVU.MOREX.r2.1HG0075910,HORVU.MOREX.r2.3HG0271180,HORVU.MOREX.r2.5HG0424260,HORVU.MOREX.r2.1HG0078200,HORVU.MOREX.r2.1HG0078540,HORVU.MOREX.r2.1HG0076430,HORVU.MOREX.r2.5HG0423510,HORVU.MOREX.r2.5HG0409840,HORVU.MOREX.r2.7HG0616150,HORVU.MOREX.r2.1HG0078080,HORVU.MOR…	HORVU.MOREX.r2.4HG0332740,HORVU.MOREX.r2.7HG0606560,HORVU.MOREX.r2.2HG0137370,HORVU.MOREX.r2.7HG0588980,HORVU.MOREX.r2.5HG0409680,HORVU.MOREX.r2.4HG0332760,HORVU.MOREX.r2.1HG0070130,HORVU.MOREX.r2.5HG0436340,HORVU.MOREX.r2.1HG0024100,HORVU.MOREX.r2.5HG0409600,HORVU.MOREX.r2.5HG0421790,HORVU.MOREX.r2.1HG0059160,HORVU.MOREX.r2.1HG0076630,HORVU.MOREX.r2.3HG0182620,HORVU.MOREX.r2.4HG0291480,HORVU.MOR…	HORVU.MOREX.r2.3HG0245960,HORVU.MOREX.r2.7HG0606560,HORVU.MOREX.r2.2HG0103970,HORVU.MOREX.r2.2HG0159710,HORVU.MOREX.r2.7HG0580390,HORVU.MOREX.r2.1HG0018040,HORVU.MOREX.r2.4HG0343480,HORVU.MOREX.r2.7HG0528960,HORVU.MOREX.r2.5HG0370130,HORVU.MOREX.r2.5HG0437010,HORVU.MOREX.r2.7HG0577670,HORVU.MOREX.r2.6HG0479200,HORVU.MOREX.r2.5HG0431510,HORVU.MOREX.r2.3HG0250830,HORVU.MOREX.r2.6HG0470320,HORVU.MOR…	9.67006e-13	0.35701	1.42979e-11
15	117	1594	0	24	21	HORVU.MOREX.r2.5HG0398100,HORVU.MOREX.r2.1HG0075930,HORVU.MOREX.r2.5HG0398680,HORVU.MOREX.r2.1HG0075910,HORVU.MOREX.r2.7HG0621290,HORVU.MOREX.r2.7HG0616150,HORVU.MOREX.r2.1HG0078080,HORVU.MOREX.r2.6HG0493050,HORVU.MOREX.r2.1HG0003750,HORVU.MOREX.r2.6HG0493270,HORVU.MOREX.r2.6HG0449810,HORVU.MOREX.r2.1HG0005040,HORVU.MOREX.r2.1HG0003500,HORVU.MOREX.r2.1HG0004200,HORVU.MOREX.r2.1HG0003400,HORVU.MOR…	HORVU.MOREX.r2.2HG0170970,HORVU.MOREX.r2.3HG0258470,HORVU.MOREX.r2.4HG0331940,HORVU.MOREX.r2.1HG0053440,HORVU.MOREX.r2.6HG0461070,HORVU.MOREX.r2.6HG0491980,HORVU.MOREX.r2.1HG0075250,HORVU.MOREX.r2.5HG0393080,HORVU.MOREX.r2.7HG0621430,HORVU.MOREX.r2.5HG0387610,HORVU.MOREX.r2.1HG0059750,HORVU.MOREX.r2.6HG0481830,HORVU.MOREX.r2.6HG0476340,HORVU.MOREX.r2.3HG0249090,HORVU.MOREX.r2.6HG0485390,HORVU.MOR…	HORVU.MOREX.r2.3HG0251960,HORVU.MOREX.r2.4HG0291510,HORVU.MOREX.r2.5HG0425450,HORVU.MOREX.r2.5HG0421990,HORVU.MOREX.r2.2HG0137840,HORVU.MOREX.r2.3HG0242960,HORVU.MOREX.r2.2HG0146300,HORVU.MOREX.r2.3HG0195450,HORVU.MOREX.r2.7HG0594100,HORVU.MOREX.r2.1HG0059750,HORVU.MOREX.r2.6HG0481830,HORVU.MOREX.r2.4HG0288170,HORVU.MOREX.r2.1HG0044410,HORVU.MOREX.r2.3HG0249090,HORVU.MOREX.r2.2HG0155650,HORVU.MOR…	4.74238e-12	0.227985	6.44754e-11
16	81	108	0	10	10	HORVU.MOREX.r2.5HG0440620,HORVU.MOREX.r2.7HG0561540,HORVU.MOREX.r2.7HG0561480,HORVU.MOREX.r2.1HG0003750,HORVU.MOREX.r2.1HG0001030,HORVU.MOREX.r2.1HG0003070,HORVU.MOREX.r2.7HG0561270,HORVU.MOREX.r2.1HG0003500,HORVU.MOREX.r2.1HG0003400,HORVU.MOREX.r2.5HG0440460	HORVU.MOREX.r2.5HG0396070,HORVU.MOREX.r2.2HG0150240,HORVU.MOREX.r2.3HG0222280,HORVU.MOREX.r2.2HG0171610,HORVU.MOREX.r2.7HG0590840,HORVU.MOREX.r2.7HG0552530,HORVU.MOREX.r2.3HG0200290,HORVU.MOREX.r2.4HG0327010,HORVU.MOREX.r2.2HG0082770,HORVU.MOREX.r2.5HG0435900	HORVU.MOREX.r2.1HG0077620,HORVU.MOREX.r2.1HG0042620,HORVU.MOREX.r2.5HG0433540,HORVU.MOREX.r2.6HG0513190,HORVU.MOREX.r2.2HG0150240,HORVU.MOREX.r2.3HG0222280,HORVU.MOREX.r2.6HG0500030,HORVU.MOREX.r2.4HG0323130,HORVU.MOREX.r2.7HG0558460,HORVU.MOREX.r2.2HG0153650,HORVU.MOREX.r2.7HG0571850,HORVU.MOREX.r2.3HG0260560,HORVU.MOREX.r2.6HG0502990,HORVU.MOREX.r2.6HG0510530,HORVU.MOREX.r2.5HG0430700,HORVU.MOR…	4.98361e-12	0.147191	6.44754e-11
17	183	182	0	39	44	HORVU.MOREX.r2.7HG0539830,HORVU.MOREX.r2.1HG0052630,HORVU.MOREX.r2.7HG0601560,HORVU.MOREX.r2.1HG0078540,HORVU.MOREX.r2.UnG0631250,HORVU.MOREX.r2.2HG0164520,HORVU.MOREX.r2.1HG0078200,HORVU.MOREX.r2.3HG0268390,HORVU.MOREX.r2.1HG0052770,HORVU.MOREX.r2.2HG0164830,HORVU.MOREX.r2.1HG0005040,HORVU.MOREX.r2.7HG0540350,HORVU.MOREX.r2.7HG0540230,HORVU.MOREX.r2.1HG0003750,HORVU.MOREX.r2.1HG0001030,HORVU.MOR…	HORVU.MOREX.r2.2HG0112120,HORVU.MOREX.r2.2HG0158800,HORVU.MOREX.r2.6HG0498710,HORVU.MOREX.r2.3HG0195810,HORVU.MOREX.r2.3HG0254340,HORVU.MOREX.r2.6HG0459050,HORVU.MOREX.r2.5HG0422890,HORVU.MOREX.r2.3HG0206150,HORVU.MOREX.r2.5HG0383360,HORVU.MOREX.r2.5HG0401430,HORVU.MOREX.r2.2HG0143700,HORVU.MOREX.r2.5HG0410240,HORVU.MOREX.r2.1HG0063050,HORVU.MOREX.r2.5HG0388480,HORVU.MOREX.r2.5HG0364690,HORVU.MOR…	HORVU.MOREX.r2.4HG0332580,HORVU.MOREX.r2.6HG0498710,HORVU.MOREX.r2.1HG0068780,HORVU.MOREX.r2.3HG0195810,HORVU.MOREX.r2.6HG0494900,HORVU.MOREX.r2.3HG0254340,HORVU.MOREX.r2.6HG0459050,HORVU.MOREX.r2.2HG0143770,HORVU.MOREX.r2.5HG0385100,HORVU.MOREX.r2.5HG0422890,HORVU.MOREX.r2.6HG0515710,HORVU.MOREX.r2.2HG0142700,HORVU.MOREX.r2.5HG0401430,HORVU.MOREX.r2.4HG0278940,HORVU.MOREX.r2.3HG0249890,HORVU.MOR…	7.36298e-12	0.328639	8.96551e-11
18	87	311	0	16	12	HORVU.MOREX.r2.5HG0398100,HORVU.MOREX.r2.5HG0408830,HORVU.MOREX.r2.1HG0075930,HORVU.MOREX.r2.1HG0003750,HORVU.MOREX.r2.1HG0003070,HORVU.MOREX.r2.5HG0398680,HORVU.MOREX.r2.1HG0003500,HORVU.MOREX.r2.1HG0078550,HORVU.MOREX.r2.1HG0075910,HORVU.MOREX.r2.1HG0078680,HORVU.MOREX.r2.5HG0398400,HORVU.MOREX.r2.1HG0078050,HORVU.MOREX.r2.1HG0078540,HORVU.MOREX.r2.UnG0630240,HORVU.MOREX.r2.1HG0003400,HORVU.MOR…	HORVU.MOREX.r2.6HG0489240,HORVU.MOREX.r2.3HG0211780,HORVU.MOREX.r2.6HG0499600,HORVU.MOREX.r2.4HG0312900,HORVU.MOREX.r2.2HG0133370,HORVU.MOREX.r2.5HG0357690,HORVU.MOREX.r2.5HG0409420,HORVU.MOREX.r2.6HG0469590,HORVU.MOREX.r2.1HG0014210,HORVU.MOREX.r2.5HG0397940,HORVU.MOREX.r2.6HG0513890,HORVU.MOREX.r2.2HG0081770	HORVU.MOREX.r2.5HG0415620,HORVU.MOREX.r2.4HG0312900,HORVU.MOREX.r2.5HG0357690,HORVU.MOREX.r2.4HG0301340,HORVU.MOREX.r2.5HG0409420,HORVU.MOREX.r2.2HG0081770,HORVU.MOREX.r2.1HG0021150,HORVU.MOREX.r2.5HG0365170,HORVU.MOREX.r2.4HG0312260,HORVU.MOREX.r2.1HG0014210,HORVU.MOREX.r2.3HG0254440,HORVU.MOREX.r2.7HG0593380,HORVU.MOREX.r2.3HG0242640,HORVU.MOREX.r2.5HG0419000,HORVU.MOREX.r2.3HG0269860,HORVU.MOR…	1.29026e-11	0.167145	1.4838e-10
19	71	172	0	4	8	HORVU.MOREX.r2.1HG0003070,HORVU.MOREX.r2.1HG0003500,HORVU.MOREX.r2.1HG0003400,HORVU.MOREX.r2.1HG0003750	HORVU.MOREX.r2.5HG0402060,HORVU.MOREX.r2.7HG0623210,HORVU.MOREX.r2.2HG0155580,HORVU.MOREX.r2.6HG0459760,HORVU.MOREX.r2.2HG0153190,HORVU.MOREX.r2.3HG0207800,HORVU.MOREX.r2.4HG0311790,HORVU.MOREX.r2.4HG0288270	HORVU.MOREX.r2.6HG0458420,HORVU.MOREX.r2.5HG0402060,HORVU.MOREX.r2.7HG0547510,HORVU.MOREX.r2.4HG0293040,HORVU.MOREX.r2.6HG0459760,HORVU.MOREX.r2.5HG0379730,HORVU.MOREX.r2.3HG0204170,HORVU.MOREX.r2.1HG0053020,HORVU.MOREX.r2.5HG0418440,HORVU.MOREX.r2.5HG0383680,HORVU.MOREX.r2.7HG0623210,HORVU.MOREX.r2.5HG0430600,HORVU.MOREX.r2.7HG0549800,HORVU.MOREX.r2.7HG0529530,HORVU.MOREX.r2.7HG0591690,HORVU.MOR…	2.72949e-11	0.132863	2.97371e-10
20	165	704	0	90	39	HORVU.MOREX.r2.5HG0424830,HORVU.MOREX.r2.5HG0384050,HORVU.MOREX.r2.4HG0291260,HORVU.MOREX.r2.5HG0374410,HORVU.MOREX.r2.1HG0078540,HORVU.MOREX.r2.5HG0432020,HORVU.MOREX.r2.5HG0375540,HORVU.MOREX.r2.5HG0425200,HORVU.MOREX.r2.5HG0381090,HORVU.MOREX.r2.1HG0004200,HORVU.MOREX.r2.5HG0432490,HORVU.MOREX.r2.5HG0424820,HORVU.MOREX.r2.5HG0373090,HORVU.MOREX.r2.5HG0432230,HORVU.MOREX.r2.5HG0398400,HORVU.MOR…	HORVU.MOREX.r2.2HG0121020,HORVU.MOREX.r2.1HG0030950,HORVU.MOREX.r2.5HG0387820,HORVU.MOREX.r2.1HG0063830,HORVU.MOREX.r2.1HG0069150,HORVU.MOREX.r2.2HG0093640,HORVU.MOREX.r2.5HG0425610,HORVU.MOREX.r2.2HG0141130,HORVU.MOREX.r2.1HG0076630,HORVU.MOREX.r2.5HG0381700,HORVU.MOREX.r2.2HG0105280,HORVU.MOREX.r2.7HG0550700,HORVU.MOREX.r2.6HG0491650,HORVU.MOREX.r2.6HG0491960,HORVU.MOREX.r2.5HG0424310,HORVU.MOR…	HORVU.MOREX.r2.2HG0121020,HORVU.MOREX.r2.7HG0585500,HORVU.MOREX.r2.2HG0093330,HORVU.MOREX.r2.5HG0354800,HORVU.MOREX.r2.2HG0156230,HORVU.MOREX.r2.3HG0212800,HORVU.MOREX.r2.1HG0018510,HORVU.MOREX.r2.3HG0198430,HORVU.MOREX.r2.4HG0318980,HORVU.MOREX.r2.5HG0381700,HORVU.MOREX.r2.5HG0438150,HORVU.MOREX.r2.6HG0491650,HORVU.MOREX.r2.6HG0491960,HORVU.MOREX.r2.5HG0424310,HORVU.MOREX.r2.5HG0397940,HORVU.MOR…	4.72266e-11	0.321858	4.88796e-10
21	77	86	0	15	65	HORVU.MOREX.r2.3HG0268400,HORVU.MOREX.r2.1HG0001750,HORVU.MOREX.r2.1HG0002560,HORVU.MOREX.r2.1HG0002570,HORVU.MOREX.r2.3HG0267290,HORVU.MOREX.r2.4HG0291260,HORVU.MOREX.r2.3HG0268390,HORVU.MOREX.r2.1HG0002180,HORVU.MOREX.r2.1HG0004200,HORVU.MOREX.r2.1HG0003750,HORVU.MOREX.r2.2HG0149940,HORVU.MOREX.r2.7HG0530810,HORVU.MOREX.r2.7HG0530220,HORVU.MOREX.r2.7HG0530990,HORVU.MOREX.r2.1HG0001710	HORVU.MOREX.r2.4HG0283820,HORVU.MOREX.r2.7HG0531700,HORVU.MOREX.r2.6HG0462100,HORVU.MOREX.r2.1HG0018310,HORVU.MOREX.r2.1HG0064550,HORVU.MOREX.r2.2HG0149440,HORVU.MOREX.r2.3HG0195140,HORVU.MOREX.r2.4HG0321130,HORVU.MOREX.r2.1HG0002200,HORVU.MOREX.r2.3HG0260620,HORVU.MOREX.r2.3HG0204120,HORVU.MOREX.r2.1HG0063090,HORVU.MOREX.r2.1HG0012760,HORVU.MOREX.r2.2HG0144330,HORVU.MOREX.r2.7HG0577820,HORVU.MOR…	HORVU.MOREX.r2.4HG0283820,HORVU.MOREX.r2.7HG0531700,HORVU.MOREX.r2.6HG0462100,HORVU.MOREX.r2.1HG0018310,HORVU.MOREX.r2.1HG0064550,HORVU.MOREX.r2.2HG0149440,HORVU.MOREX.r2.3HG0250890,HORVU.MOREX.r2.4HG0321130,HORVU.MOREX.r2.1HG0002200,HORVU.MOREX.r2.3HG0260620,HORVU.MOREX.r2.3HG0204120,HORVU.MOREX.r2.1HG0063090,HORVU.MOREX.r2.1HG0012760,HORVU.MOREX.r2.2HG0144330,HORVU.MOREX.r2.7HG0577820,HORVU.MOR…	9.02982e-11	5.79447	8.90082e-10
22	84	134	0	21	13	HORVU.MOREX.r2.7HG0543070,HORVU.MOREX.r2.1HG0001750,HORVU.MOREX.r2.7HG0559570,HORVU.MOREX.r2.1HG0002560,HORVU.MOREX.r2.1HG0002570,HORVU.MOREX.r2.1HG0001030,HORVU.MOREX.r2.1HG0003750,HORVU.MOREX.r2.2HG0167890,HORVU.MOREX.r2.4HG0291260,HORVU.MOREX.r2.1HG0003070,HORVU.MOREX.r2.2HG0167640,HORVU.MOREX.r2.1HG0002180,HORVU.MOREX.r2.1HG0003500,HORVU.MOREX.r2.7HG0560510,HORVU.MOREX.r2.2HG0167630,HORVU.MOR…	HORVU.MOREX.r2.4HG0294930,HORVU.MOREX.r2.6HG0505660,HORVU.MOREX.r2.2HG0153230,HORVU.MOREX.r2.2HG0168960,HORVU.MOREX.r2.2HG0155580,HORVU.MOREX.r2.1HG0062930,HORVU.MOREX.r2.3HG0207800,HORVU.MOREX.r2.7HG0560290,HORVU.MOREX.r2.4HG0311790,HORVU.MOREX.r2.7HG0534020,HORVU.MOREX.r2.3HG0210900,HORVU.MOREX.r2.2HG0166810,HORVU.MOREX.r2.2HG0167650	HORVU.MOREX.r2.6HG0503700,HORVU.MOREX.r2.4HG0327390,HORVU.MOREX.r2.6HG0487890,HORVU.MOREX.r2.7HG0570650,HORVU.MOREX.r2.6HG0525270,HORVU.MOREX.r2.6HG0495460,HORVU.MOREX.r2.4HG0293380,HORVU.MOREX.r2.2HG0168960,HORVU.MOREX.r2.3HG0240310,HORVU.MOREX.r2.2HG0155580,HORVU.MOREX.r2.2HG0151640,HORVU.MOREX.r2.4HG0343570,HORVU.MOREX.r2.7HG0560290,HORVU.MOREX.r2.2HG0147280,HORVU.MOREX.r2.5HG0431970,HORVU.MOR…	2.01447e-10	0.191468	1.8442e-09
23	53	29	0	11	4	HORVU.MOREX.r2.7HG0549060,HORVU.MOREX.r2.1HG0078540,HORVU.MOREX.r2.7HG0549250,HORVU.MOREX.r2.1HG0078680,HORVU.MOREX.r2.3HG0203410,HORVU.MOREX.r2.1HG0078050,HORVU.MOREX.r2.1HG0078550,HORVU.MOREX.r2.1HG0004200,HORVU.MOREX.r2.3HG0204680,HORVU.MOREX.r2.UnG0630240,HORVU.MOREX.r2.1HG0078200	HORVU.MOREX.r2.7HG0546500,HORVU.MOREX.r2.3HG0245400,HORVU.MOREX.r2.3HG0210350,HORVU.MOREX.r2.2HG0149590	HORVU.MOREX.r2.6HG0496420,HORVU.MOREX.r2.4HG0276500,HORVU.MOREX.r2.7HG0546500,HORVU.MOREX.r2.1HG0025820,HORVU.MOREX.r2.7HG0556450,HORVU.MOREX.r2.2HG0150360,HORVU.MOREX.r2.7HG0609360,HORVU.MOREX.r2.2HG0149590,HORVU.MOREX.r2.4HG0284840,HORVU.MOREX.r2.6HG0469220,HORVU.MOREX.r2.1HG0016770,HORVU.MOREX.r2.3HG0250850,HORVU.MOREX.r2.4HG0328560,HORVU.MOREX.r2.7HG0570810,HORVU.MOREX.r2.7HG0610310,HORVU.MOR…	2.04912e-10	0.0855793	1.8442e-09
24	69	476	0	15	9	HORVU.MOREX.r2.5HG0424820,HORVU.MOREX.r2.5HG0424830,HORVU.MOREX.r2.5HG0425570,HORVU.MOREX.r2.5HG0424740,HORVU.MOREX.r2.5HG0423680,HORVU.MOREX.r2.5HG0424570,HORVU.MOREX.r2.1HG0003070,HORVU.MOREX.r2.4HG0331610,HORVU.MOREX.r2.5HG0424260,HORVU.MOREX.r2.5HG0424020,HORVU.MOREX.r2.1HG0003500,HORVU.MOREX.r2.5HG0424900,HORVU.MOREX.r2.5HG0423510,HORVU.MOREX.r2.1HG0003400,HORVU.MOREX.r2.5HG0425200	HORVU.MOREX.r2.5HG0413480,HORVU.MOREX.r2.3HG0190840,HORVU.MOREX.r2.1HG0061800,HORVU.MOREX.r2.7HG0564200,HORVU.MOREX.r2.6HG0511230,HORVU.MOREX.r2.2HG0103990,HORVU.MOREX.r2.3HG0254920,HORVU.MOREX.r2.5HG0424650,HORVU.MOREX.r2.2HG0166800	HORVU.MOREX.r2.7HG0567840,HORVU.MOREX.r2.6HG0500350,HORVU.MOREX.r2.7HG0541840,HORVU.MOREX.r2.5HG0424690,HORVU.MOREX.r2.4HG0346770,HORVU.MOREX.r2.1HG0013150,HORVU.MOREX.r2.2HG0136260,HORVU.MOREX.r2.7HG0598100,HORVU.MOREX.r2.5HG0349480,HORVU.MOREX.r2.2HG0132010,HORVU.MOREX.r2.4HG0312260,HORVU.MOREX.r2.4HG0283640,HORVU.MOREX.r2.2HG0129220,HORVU.MOREX.r2.5HG0413480,HORVU.MOREX.r2.4HG0338120,HORVU.MOR…	5.55383e-10	0.157071	4.64673e-09
25	82	249	0	11	13	HORVU.MOREX.r2.1HG0001750,HORVU.MOREX.r2.1HG0002560,HORVU.MOREX.r2.1HG0002570,HORVU.MOREX.r2.1HG0003750,HORVU.MOREX.r2.4HG0291260,HORVU.MOREX.r2.1HG0003070,HORVU.MOREX.r2.1HG0002180,HORVU.MOREX.r2.1HG0003500,HORVU.MOREX.r2.1HG0001710,HORVU.MOREX.r2.1HG0003400,HORVU.MOREX.r2.1HG0078080	HORVU.MOREX.r2.7HG0540790,HORVU.MOREX.r2.6HG0484190,HORVU.MOREX.r2.3HG0222280,HORVU.MOREX.r2.5HG0407080,HORVU.MOREX.r2.5HG0434370,HORVU.MOREX.r2.5HG0402660,HORVU.MOREX.r2.2HG0114100,HORVU.MOREX.r2.3HG0257800,HORVU.MOREX.r2.3HG0219750,HORVU.MOREX.r2.3HG0201670,HORVU.MOREX.r2.6HG0505700,HORVU.MOREX.r2.3HG0196390,HORVU.MOREX.r2.6HG0485900	HORVU.MOREX.r2.UnG0629360,HORVU.MOREX.r2.1HG0024040,HORVU.MOREX.r2.1HG0059460,HORVU.MOREX.r2.4HG0333360,HORVU.MOREX.r2.UnG0631120,HORVU.MOREX.r2.2HG0135590,HORVU.MOREX.r2.6HG0522390,HORVU.MOREX.r2.4HG0325800,HORVU.MOREX.r2.3HG0214760,HORVU.MOREX.r2.3HG0219750,HORVU.MOREX.r2.3HG0196390,HORVU.MOREX.r2.7HG0540790,HORVU.MOREX.r2.6HG0484190,HORVU.MOREX.r2.7HG0536830,HORVU.MOREX.r2.2HG0180620,HORVU.MOR…	5.612e-10	0.197097	4.64673e-09
26	135	170	0	64	31	HORVU.MOREX.r2.5HG0384030,HORVU.MOREX.r2.5HG0384070,HORVU.MOREX.r2.5HG0374850,HORVU.MOREX.r2.5HG0384050,HORVU.MOREX.r2.5HG0370870,HORVU.MOREX.r2.4HG0291260,HORVU.MOREX.r2.3HG0184030,HORVU.MOREX.r2.5HG0376150,HORVU.MOREX.r2.5HG0438470,HORVU.MOREX.r2.5HG0439140,HORVU.MOREX.r2.7HG0541620,HORVU.MOREX.r2.5HG0379510,HORVU.MOREX.r2.5HG0384340,HORVU.MOREX.r2.5HG0366280,HORVU.MOREX.r2.5HG0375540,HORVU.MOR…	HORVU.MOREX.r2.2HG0105540,HORVU.MOREX.r2.7HG0578220,HORVU.MOREX.r2.2HG0163370,HORVU.MOREX.r2.3HG0239480,HORVU.MOREX.r2.2HG0123640,HORVU.MOREX.r2.7HG0583750,HORVU.MOREX.r2.2HG0154140,HORVU.MOREX.r2.3HG0232900,HORVU.MOREX.r2.7HG0541250,HORVU.MOREX.r2.3HG0186230,HORVU.MOREX.r2.3HG0184480,HORVU.MOREX.r2.5HG0438750,HORVU.MOREX.r2.7HG0587150,HORVU.MOREX.r2.1HG0065070,HORVU.MOREX.r2.2HG0096390,HORVU.MOR…	HORVU.MOREX.r2.2HG0105540,HORVU.MOREX.r2.4HG0296940,HORVU.MOREX.r2.5HG0390920,HORVU.MOREX.r2.4HG0282650,HORVU.MOREX.r2.3HG0239480,HORVU.MOREX.r2.5HG0364830,HORVU.MOREX.r2.7HG0583750,HORVU.MOREX.r2.7HG0578220,HORVU.MOREX.r2.3HG0230120,HORVU.MOREX.r2.2HG0177900,HORVU.MOREX.r2.3HG0201840,HORVU.MOREX.r2.3HG0203270,HORVU.MOREX.r2.2HG0163370,HORVU.MOREX.r2.1HG0071810,HORVU.MOREX.r2.7HG0587150,HORVU.MOR…	9.64238e-10	0.310813	7.67682e-09
27	76	110	0	6	12	HORVU.MOREX.r2.1HG0003070,HORVU.MOREX.r2.7HG0623230,HORVU.MOREX.r2.6HG0472210,HORVU.MOREX.r2.1HG0005040,HORVU.MOREX.r2.1HG0003500,HORVU.MOREX.r2.1HG0003400	HORVU.MOREX.r2.UnG0626100,HORVU.MOREX.r2.7HG0612760,HORVU.MOREX.r2.3HG0207940,HORVU.MOREX.r2.7HG0622360,HORVU.MOREX.r2.4HG0282540,HORVU.MOREX.r2.2HG0126960,HORVU.MOREX.r2.5HG0397520,HORVU.MOREX.r2.7HG0623430,HORVU.MOREX.r2.4HG0288270,HORVU.MOREX.r2.4HG0322120,HORVU.MOREX.r2.5HG0359840,HORVU.MOREX.r2.7HG0622280	HORVU.MOREX.r2.1HG0056090,HORVU.MOREX.r2.5HG0417590,HORVU.MOREX.r2.5HG0362130,HORVU.MOREX.r2.3HG0214120,HORVU.MOREX.r2.5HG0406610,HORVU.MOREX.r2.7HG0622280,HORVU.MOREX.r2.5HG0443670,HORVU.MOREX.r2.2HG0148200,HORVU.MOREX.r2.2HG0153170,HORVU.MOREX.r2.4HG0294760,HORVU.MOREX.r2.3HG0225050,HORVU.MOREX.r2.4HG0282540,HORVU.MOREX.r2.6HG0494000,HORVU.MOREX.r2.1HG0063950,HORVU.MOREX.r2.6HG0499880,HORVU.MOR…	2.38522e-09	0.196305	1.82867e-08
28	97	265	0	36	19	HORVU.MOREX.r2.1HG0078540,HORVU.MOREX.r2.4HG0291260,HORVU.MOREX.r2.1HG0051280,HORVU.MOREX.r2.1HG0051370,HORVU.MOREX.r2.1HG0078200,HORVU.MOREX.r2.7HG0582650,HORVU.MOREX.r2.1HG0051240,HORVU.MOREX.r2.1HG0005040,HORVU.MOREX.r2.1HG0001710,HORVU.MOREX.r2.1HG0002560,HORVU.MOREX.r2.1HG0003750,HORVU.MOREX.r2.1HG0001030,HORVU.MOREX.r2.4HG0344720,HORVU.MOREX.r2.7HG0582310,HORVU.MOREX.r2.1HG0003500,HORVU.MOR…	HORVU.MOREX.r2.1HG0051060,HORVU.MOREX.r2.7HG0583460,HORVU.MOREX.r2.4HG0344580,HORVU.MOREX.r2.1HG0015640,HORVU.MOREX.r2.1HG0051000,HORVU.MOREX.r2.6HG0485390,HORVU.MOREX.r2.3HG0223560,HORVU.MOREX.r2.6HG0463980,HORVU.MOREX.r2.6HG0497270,HORVU.MOREX.r2.6HG0511430,HORVU.MOREX.r2.2HG0146380,HORVU.MOREX.r2.2HG0164500,HORVU.MOREX.r2.4HG0308370,HORVU.MOREX.r2.2HG0147940,HORVU.MOREX.r2.5HG0445080,HORVU.MOR…	HORVU.MOREX.r2.1HG0045520,HORVU.MOREX.r2.1HG0042270,HORVU.MOREX.r2.4HG0344580,HORVU.MOREX.r2.2HG0116140,HORVU.MOREX.r2.2HG0095500,HORVU.MOREX.r2.7HG0589320,HORVU.MOREX.r2.2HG0112070,HORVU.MOREX.r2.7HG0565000,HORVU.MOREX.r2.5HG0403530,HORVU.MOREX.r2.5HG0396210,HORVU.MOREX.r2.2HG0146380,HORVU.MOREX.r2.4HG0285910,HORVU.MOREX.r2.2HG0155650,HORVU.MOREX.r2.3HG0246040,HORVU.MOREX.r2.5HG0363100,HORVU.MOR…	3.97951e-09	0.254688	2.942e-08
29	55	128	0	4	6	HORVU.MOREX.r2.1HG0003070,HORVU.MOREX.r2.1HG0003500,HORVU.MOREX.r2.1HG0003400,HORVU.MOREX.r2.1HG0004200	HORVU.MOREX.r2.2HG0135820,HORVU.MOREX.r2.7HG0562570,HORVU.MOREX.r2.1HG0073000,HORVU.MOREX.r2.4HG0336480,HORVU.MOREX.r2.3HG0223850,HORVU.MOREX.r2.7HG0562220	HORVU.MOREX.r2.4HG0303620,HORVU.MOREX.r2.6HG0525270,HORVU.MOREX.r2.4HG0287500,HORVU.MOREX.r2.3HG0262430,HORVU.MOREX.r2.6HG0500170,HORVU.MOREX.r2.6HG0500390,HORVU.MOREX.r2.5HG0354170,HORVU.MOREX.r2.3HG0251820,HORVU.MOREX.r2.6HG0506770,HORVU.MOREX.r2.5HG0423860,HORVU.MOREX.r2.7HG0618740,HORVU.MOREX.r2.3HG0262440,HORVU.MOREX.r2.7HG0562570,HORVU.MOREX.r2.2HG0107650,HORVU.MOREX.r2.5HG0429450,HORVU.MOR…	4.58918e-09	0.128423	3.27573e-08
30	133	240	0	40	32	HORVU.MOREX.r2.6HG0507060,HORVU.MOREX.r2.5HG0398100,HORVU.MOREX.r2.1HG0052630,HORVU.MOREX.r2.2HG0094680,HORVU.MOREX.r2.2HG0164520,HORVU.MOREX.r2.4HG0337620,HORVU.MOREX.r2.5HG0398680,HORVU.MOREX.r2.6HG0497600,HORVU.MOREX.r2.2HG0163880,HORVU.MOREX.r2.1HG0052770,HORVU.MOREX.r2.2HG0164830,HORVU.MOREX.r2.2HG0162870,HORVU.MOREX.r2.6HG0509490,HORVU.MOREX.r2.1HG0001710,HORVU.MOREX.r2.1HG0002560,HORVU.MOR…	HORVU.MOREX.r2.2HG0110730,HORVU.MOREX.r2.3HG0221260,HORVU.MOREX.r2.2HG0164160,HORVU.MOREX.r2.2HG0165420,HORVU.MOREX.r2.7HG0538290,HORVU.MOREX.r2.7HG0551940,HORVU.MOREX.r2.2HG0163480,HORVU.MOREX.r2.5HG0408620,HORVU.MOREX.r2.5HG0349260,HORVU.MOREX.r2.1HG0053340,HORVU.MOREX.r2.2HG0165080,HORVU.MOREX.r2.1HG0043780,HORVU.MOREX.r2.7HG0549220,HORVU.MOREX.r2.6HG0508760,HORVU.MOREX.r2.4HG0317680,HORVU.MOR…	HORVU.MOREX.r2.2HG0127000,HORVU.MOREX.r2.6HG0499920,HORVU.MOREX.r2.7HG0538290,HORVU.MOREX.r2.4HG0299970,HORVU.MOREX.r2.5HG0412850,HORVU.MOREX.r2.5HG0388560,HORVU.MOREX.r2.1HG0075630,HORVU.MOREX.r2.3HG0184170,HORVU.MOREX.r2.7HG0526910,HORVU.MOREX.r2.7HG0587840,HORVU.MOREX.r2.2HG0154910,HORVU.MOREX.r2.2HG0164160,HORVU.MOREX.r2.1HG0016720,HORVU.MOREX.r2.4HG0302460,HORVU.MOREX.r2.2HG0082090,HORVU.MOR…	7.00141e-09	0.330639	4.83098e-08
31	60	74	0	35	8	HORVU.MOREX.r2.3HG0210420,HORVU.MOREX.r2.3HG0209860,HORVU.MOREX.r2.3HG0225790,HORVU.MOREX.r2.4HG0291260,HORVU.MOREX.r2.3HG0209090,HORVU.MOREX.r2.1HG0001750,HORVU.MOREX.r2.3HG0232450,HORVU.MOREX.r2.1HG0001710,HORVU.MOREX.r2.7HG0552580,HORVU.MOREX.r2.1HG0002560,HORVU.MOREX.r2.3HG0229390,HORVU.MOREX.r2.7HG0554060,HORVU.MOREX.r2.3HG0226630,HORVU.MOREX.r2.3HG0210560,HORVU.MOREX.r2.1HG0003500,HORVU.MOR…	HORVU.MOREX.r2.6HG0465770,HORVU.MOREX.r2.3HG0225580,HORVU.MOREX.r2.6HG0493720,HORVU.MOREX.r2.2HG0134510,HORVU.MOREX.r2.7HG0553750,HORVU.MOREX.r2.7HG0599900,HORVU.MOREX.r2.1HG0051860,HORVU.MOREX.r2.5HG0439460	HORVU.MOREX.r2.1HG0056090,HORVU.MOREX.r2.6HG0465770,HORVU.MOREX.r2.1HG0032460,HORVU.MOREX.r2.4HG0289910,HORVU.MOREX.r2.3HG0223010,HORVU.MOREX.r2.3HG0265580,HORVU.MOREX.r2.1HG0040810,HORVU.MOREX.r2.7HG0600040,HORVU.MOREX.r2.7HG0553750,HORVU.MOREX.r2.2HG0150000,HORVU.MOREX.r2.7HG0600060,HORVU.MOREX.r2.2HG0149970,HORVU.MOREX.r2.5HG0399780,HORVU.MOREX.r2.3HG0224180,HORVU.MOREX.r2.3HG0225580,HORVU.MOR…	1.22271e-08	0.161323	8.16457e-08
32	63	30	0	11	9	HORVU.MOREX.r2.7HG0558940,HORVU.MOREX.r2.3HG0182360,HORVU.MOREX.r2.3HG0182040,HORVU.MOREX.r2.4HG0278840,HORVU.MOREX.r2.3HG0181420,HORVU.MOREX.r2.1HG0003070,HORVU.MOREX.r2.6HG0514530,HORVU.MOREX.r2.1HG0003500,HORVU.MOREX.r2.3HG0181430,HORVU.MOREX.r2.1HG0069610,HORVU.MOREX.r2.1HG0003400	HORVU.MOREX.r2.6HG0521040,HORVU.MOREX.r2.7HG0554170,HORVU.MOREX.r2.2HG0176090,HORVU.MOREX.r2.7HG0556530,HORVU.MOREX.r2.6HG0514480,HORVU.MOREX.r2.4HG0278830,HORVU.MOREX.r2.1HG0069480,HORVU.MOREX.r2.3HG0182460,HORVU.MOREX.r2.7HG0556630	HORVU.MOREX.r2.5HG0433190,HORVU.MOREX.r2.7HG0614070,HORVU.MOREX.r2.6HG0521040,HORVU.MOREX.r2.5HG0432740,HORVU.MOREX.r2.7HG0528750,HORVU.MOREX.r2.2HG0176090,HORVU.MOREX.r2.6HG0485270,HORVU.MOREX.r2.7HG0556530,HORVU.MOREX.r2.6HG0473090,HORVU.MOREX.r2.4HG0346900,HORVU.MOREX.r2.3HG0255340,HORVU.MOREX.r2.2HG0150020,HORVU.MOREX.r2.6HG0494000,HORVU.MOREX.r2.1HG0036000,HORVU.MOREX.r2.3HG0182460,HORVU.MOR…	1.40959e-08	0.174733	9.11826e-08
33	78	225	0	36	14	HORVU.MOREX.r2.3HG0270250,HORVU.MOREX.r2.2HG0167860,HORVU.MOREX.r2.7HG0591410,HORVU.MOREX.r2.7HG0589750,HORVU.MOREX.r2.3HG0270990,HORVU.MOREX.r2.1HG0078540,HORVU.MOREX.r2.1HG0078050,HORVU.MOREX.r2.7HG0591580,HORVU.MOREX.r2.7HG0590580,HORVU.MOREX.r2.1HG0078080,HORVU.MOREX.r2.1HG0003750,HORVU.MOREX.r2.1HG0001030,HORVU.MOREX.r2.UnG0630960,HORVU.MOREX.r2.1HG0003500,HORVU.MOREX.r2.1HG0078680,HORVU.MOR…	HORVU.MOREX.r2.2HG0167090,HORVU.MOREX.r2.7HG0614750,HORVU.MOREX.r2.3HG0272190,HORVU.MOREX.r2.6HG0507260,HORVU.MOREX.r2.6HG0462220,HORVU.MOREX.r2.6HG0524490,HORVU.MOREX.r2.4HG0345700,HORVU.MOREX.r2.7HG0597670,HORVU.MOREX.r2.4HG0319070,HORVU.MOREX.r2.2HG0166810,HORVU.MOREX.r2.5HG0387000,HORVU.MOREX.r2.7HG0593190,HORVU.MOREX.r2.2HG0130920,HORVU.MOREX.r2.5HG0445080	HORVU.MOREX.r2.4HG0316350,HORVU.MOREX.r2.7HG0535850,HORVU.MOREX.r2.5HG0372070,HORVU.MOREX.r2.3HG0272190,HORVU.MOREX.r2.6HG0462220,HORVU.MOREX.r2.2HG0141580,HORVU.MOREX.r2.2HG0103930,HORVU.MOREX.r2.5HG0430160,HORVU.MOREX.r2.3HG0249950,HORVU.MOREX.r2.4HG0309920,HORVU.MOREX.r2.2HG0175160,HORVU.MOREX.r2.1HG0003010,HORVU.MOREX.r2.6HG0524490,HORVU.MOREX.r2.1HG0030920,HORVU.MOREX.r2.2HG0119510,HORVU.MOR…	1.93923e-08	0.229119	1.21643e-07
34	141	128	0	52	36	HORVU.MOREX.r2.3HG0222630,HORVU.MOREX.r2.3HG0209860,HORVU.MOREX.r2.7HG0591410,HORVU.MOREX.r2.7HG0589750,HORVU.MOREX.r2.2HG0170020,HORVU.MOREX.r2.3HG0209090,HORVU.MOREX.r2.3HG0229280,HORVU.MOREX.r2.6HG0513710,HORVU.MOREX.r2.3HG0226630,HORVU.MOREX.r2.7HG0590580,HORVU.MOREX.r2.2HG0171170,HORVU.MOREX.r2.6HG0513610,HORVU.MOREX.r2.1HG0002560,HORVU.MOREX.r2.1HG0003750,HORVU.MOREX.r2.1HG0001030,HORVU.MOR…	HORVU.MOREX.r2.6HG0487260,HORVU.MOREX.r2.7HG0589160,HORVU.MOREX.r2.2HG0108480,HORVU.MOREX.r2.2HG0084490,HORVU.MOREX.r2.3HG0232920,HORVU.MOREX.r2.7HG0547330,HORVU.MOREX.r2.3HG0248820,HORVU.MOREX.r2.6HG0513490,HORVU.MOREX.r2.1HG0069340,HORVU.MOREX.r2.3HG0262300,HORVU.MOREX.r2.6HG0454100,HORVU.MOREX.r2.7HG0574220,HORVU.MOREX.r2.2HG0153930,HORVU.MOREX.r2.2HG0170860,HORVU.MOREX.r2.5HG0410380,HORVU.MOR…	HORVU.MOREX.r2.7HG0589160,HORVU.MOREX.r2.3HG0217590,HORVU.MOREX.r2.4HG0341200,HORVU.MOREX.r2.2HG0147460,HORVU.MOREX.r2.5HG0365770,HORVU.MOREX.r2.3HG0248820,HORVU.MOREX.r2.2HG0155970,HORVU.MOREX.r2.7HG0531720,HORVU.MOREX.r2.2HG0171960,HORVU.MOREX.r2.2HG0170860,HORVU.MOREX.r2.3HG0188890,HORVU.MOREX.r2.3HG0214090,HORVU.MOREX.r2.3HG0252190,HORVU.MOREX.r2.6HG0505460,HORVU.MOREX.r2.2HG0151330,HORVU.MOR…	2.06332e-08	0.357811	1.2562e-07
35	80	131	0	14	15	HORVU.MOREX.r2.6HG0459120,HORVU.MOREX.r2.7HG0553840,HORVU.MOREX.r2.7HG0551080,HORVU.MOREX.r2.6HG0459110,HORVU.MOREX.r2.7HG0554850,HORVU.MOREX.r2.1HG0003070,HORVU.MOREX.r2.7HG0554060,HORVU.MOREX.r2.7HG0552160,HORVU.MOREX.r2.2HG0126790,HORVU.MOREX.r2.1HG0003500,HORVU.MOREX.r2.7HG0553740,HORVU.MOREX.r2.1HG0003750,HORVU.MOREX.r2.7HG0552580,HORVU.MOREX.r2.1HG0003400	HORVU.MOREX.r2.1HG0027190,HORVU.MOREX.r2.2HG0136730,HORVU.MOREX.r2.2HG0147250,HORVU.MOREX.r2.2HG0126300,HORVU.MOREX.r2.3HG0207310,HORVU.MOREX.r2.6HG0492010,HORVU.MOREX.r2.2HG0123120,HORVU.MOREX.r2.5HG0430170,HORVU.MOREX.r2.6HG0459010,HORVU.MOREX.r2.2HG0105740,HORVU.MOREX.r2.2HG0133090,HORVU.MOREX.r2.7HG0551550,HORVU.MOREX.r2.7HG0551540,HORVU.MOREX.r2.1HG0020600,HORVU.MOREX.r2.5HG0380000	HORVU.MOREX.r2.7HG0598710,HORVU.MOREX.r2.5HG0430280,HORVU.MOREX.r2.2HG0136730,HORVU.MOREX.r2.1HG0015930,HORVU.MOREX.r2.2HG0147250,HORVU.MOREX.r2.2HG0159320,HORVU.MOREX.r2.3HG0238690,HORVU.MOREX.r2.7HG0610860,HORVU.MOREX.r2.6HG0459010,HORVU.MOREX.r2.2HG0096220,HORVU.MOREX.r2.3HG0248040,HORVU.MOREX.r2.7HG0551540,HORVU.MOREX.r2.1HG0030230,HORVU.MOREX.r2.3HG0182370,HORVU.MOREX.r2.1HG0027000,HORVU.MOR…	3.15692e-08	0.24171	1.86709e-07
36	64	249	0	8	10	HORVU.MOREX.r2.1HG0003750,HORVU.MOREX.r2.1HG0003070,HORVU.MOREX.r2.1HG0003500,HORVU.MOREX.r2.6HG0507380,HORVU.MOREX.r2.6HG0507060,HORVU.MOREX.r2.1HG0003400,HORVU.MOREX.r2.6HG0509490,HORVU.MOREX.r2.6HG0507040	HORVU.MOREX.r2.1HG0072390,HORVU.MOREX.r2.6HG0509500,HORVU.MOREX.r2.6HG0507730,HORVU.MOREX.r2.6HG0507050,HORVU.MOREX.r2.6HG0508420,HORVU.MOREX.r2.6HG0509530,HORVU.MOREX.r2.7HG0547680,HORVU.MOREX.r2.5HG0387000,HORVU.MOREX.r2.6HG0507900,HORVU.MOREX.r2.6HG0509480	HORVU.MOREX.r2.6HG0490030,HORVU.MOREX.r2.2HG0093150,HORVU.MOREX.r2.6HG0508420,HORVU.MOREX.r2.4HG0311830,HORVU.MOREX.r2.5HG0445840,HORVU.MOREX.r2.1HG0068470,HORVU.MOREX.r2.6HG0479090,HORVU.MOREX.r2.7HG0611120,HORVU.MOREX.r2.UnG0626280,HORVU.MOREX.r2.5HG0411090,HORVU.MOREX.r2.3HG0221170,HORVU.MOREX.r2.1HG0025750,HORVU.MOREX.r2.6HG0509530,HORVU.MOREX.r2.5HG0387000,HORVU.MOREX.r2.4HG0347280,HORVU.MOR…	4.44701e-08	0.194188	2.55703e-07
37	39	249	0	10	3	HORVU.MOREX.r2.4HG0291260,HORVU.MOREX.r2.1HG0002560,HORVU.MOREX.r2.1HG0002570,HORVU.MOREX.r2.1HG0001750,HORVU.MOREX.r2.1HG0003070,HORVU.MOREX.r2.5HG0349350,HORVU.MOREX.r2.1HG0002180,HORVU.MOREX.r2.1HG0003500,HORVU.MOREX.r2.1HG0003400,HORVU.MOREX.r2.1HG0001710	HORVU.MOREX.r2.2HG0153330,HORVU.MOREX.r2.5HG0349330,HORVU.MOREX.r2.6HG0496920	HORVU.MOREX.r2.2HG0115500,HORVU.MOREX.r2.5HG0404270,HORVU.MOREX.r2.5HG0399300,HORVU.MOREX.r2.7HG0603690,HORVU.MOREX.r2.5HG0404230,HORVU.MOREX.r2.2HG0153340,HORVU.MOREX.r2.5HG0399360,HORVU.MOREX.r2.2HG0083720,HORVU.MOREX.r2.7HG0608910,HORVU.MOREX.r2.6HG0516450,HORVU.MOREX.r2.4HG0290140,HORVU.MOREX.r2.5HG0404200,HORVU.MOREX.r2.5HG0399310,HORVU.MOREX.r2.5HG0356360,HORVU.MOREX.r2.5HG0399420,HORVU.MOR…	4.94543e-08	0.0875706	2.76677e-07
38	60	162	0	10	9	HORVU.MOREX.r2.2HG0180770,HORVU.MOREX.r2.1HG0003750,HORVU.MOREX.r2.1HG0001030,HORVU.MOREX.r2.1HG0003070,HORVU.MOREX.r2.1HG0003500,HORVU.MOREX.r2.7HG0530810,HORVU.MOREX.r2.7HG0549330,HORVU.MOREX.r2.7HG0530990,HORVU.MOREX.r2.1HG0003400,HORVU.MOREX.r2.2HG0181050	HORVU.MOREX.r2.7HG0549340,HORVU.MOREX.r2.5HG0423580,HORVU.MOREX.r2.7HG0530900,HORVU.MOREX.r2.3HG0251670,HORVU.MOREX.r2.2HG0180710,HORVU.MOREX.r2.4HG0306970,HORVU.MOREX.r2.4HG0341190,HORVU.MOREX.r2.7HG0613640,HORVU.MOREX.r2.6HG0499320	HORVU.MOREX.r2.5HG0361260,HORVU.MOREX.r2.6HG0449580,HORVU.MOREX.r2.3HG0251670,HORVU.MOREX.r2.7HG0538510,HORVU.MOREX.r2.4HG0316440,HORVU.MOREX.r2.1HG0039970,HORVU.MOREX.r2.7HG0613640,HORVU.MOREX.r2.7HG0529000,HORVU.MOREX.r2.7HG0527700,HORVU.MOREX.r2.3HG0182580,HORVU.MOREX.r2.1HG0044620,HORVU.MOREX.r2.7HG0567960,HORVU.MOREX.r2.6HG0522160,HORVU.MOREX.r2.5HG0423580,HORVU.MOREX.r2.7HG0530900,HORVU.MOR…	6.88631e-08	0.185122	3.75123e-07
39	66	72	0	11	11	HORVU.MOREX.r2.4HG0332490,HORVU.MOREX.r2.7HG0554980,HORVU.MOREX.r2.1HG0073610,HORVU.MOREX.r2.4HG0315870,HORVU.MOREX.r2.1HG0075930,HORVU.MOREX.r2.4HG0335300,HORVU.MOREX.r2.1HG0075910,HORVU.MOREX.r2.1HG0003750,HORVU.MOREX.r2.1HG0073450,HORVU.MOREX.r2.7HG0530220,HORVU.MOREX.r2.1HG0078080	HORVU.MOREX.r2.7HG0554650,HORVU.MOREX.r2.7HG0586250,HORVU.MOREX.r2.5HG0401340,HORVU.MOREX.r2.7HG0530550,HORVU.MOREX.r2.5HG0368980,HORVU.MOREX.r2.1HG0073510,HORVU.MOREX.r2.1HG0059720,HORVU.MOREX.r2.1HG0056950,HORVU.MOREX.r2.6HG0523360,HORVU.MOREX.r2.1HG0073220,HORVU.MOREX.r2.1HG0073500	HORVU.MOREX.r2.3HG0184600,HORVU.MOREX.r2.6HG0489830,HORVU.MOREX.r2.5HG0385220,HORVU.MOREX.r2.2HG0142880,HORVU.MOREX.r2.4HG0336770,HORVU.MOREX.r2.1HG0062270,HORVU.MOREX.r2.2HG0145100,HORVU.MOREX.r2.3HG0249480,HORVU.MOREX.r2.5HG0434090,HORVU.MOREX.r2.3HG0230900,HORVU.MOREX.r2.7HG0530550,HORVU.MOREX.r2.3HG0199430,HORVU.MOREX.r2.7HG0554650,HORVU.MOREX.r2.7HG0552760,HORVU.MOREX.r2.7HG0581030,HORVU.MOR…	7.8584e-08	0.209725	4.171e-07
40	49	41	0	9	6	HORVU.MOREX.r2.3HG0258670,HORVU.MOREX.r2.5HG0385350,HORVU.MOREX.r2.1HG0003750,HORVU.MOREX.r2.1HG0003070,HORVU.MOREX.r2.5HG0385900,HORVU.MOREX.r2.1HG0003500,HORVU.MOREX.r2.3HG0258430,HORVU.MOREX.r2.1HG0003400,HORVU.MOREX.r2.1HG0078080	HORVU.MOREX.r2.5HG0376770,HORVU.MOREX.r2.3HG0258190,HORVU.MOREX.r2.2HG0106180,HORVU.MOREX.r2.2HG0161520,HORVU.MOREX.r2.4HG0343460,HORVU.MOREX.r2.4HG0290730	HORVU.MOREX.r2.3HG0231260,HORVU.MOREX.r2.1HG0055160,HORVU.MOREX.r2.3HG0231450,HORVU.MOREX.r2.2HG0161520,HORVU.MOREX.r2.3HG0254440,HORVU.MOREX.r2.4HG0303300,HORVU.MOREX.r2.5HG0376770,HORVU.MOREX.r2.3HG0258190,HORVU.MOREX.r2.2HG0106180,HORVU.MOREX.r2.4HG0317930,HORVU.MOREX.r2.6HG0501530,HORVU.MOREX.r2.4HG0343460,HORVU.MOREX.r2.2HG0107290,HORVU.MOREX.r2.4HG0290730,HORVU.MOREX.r2.2HG0177550,HORVU.MOR…	1.36777e-07	0.146517	7.07823e-07
41	53	83	0	16	8	HORVU.MOREX.r2.1HG0001710,HORVU.MOREX.r2.1HG0001750,HORVU.MOREX.r2.1HG0075930,HORVU.MOREX.r2.1HG0002570,HORVU.MOREX.r2.6HG0513640,HORVU.MOREX.r2.1HG0003750,HORVU.MOREX.r2.4HG0291260,HORVU.MOREX.r2.1HG0003070,HORVU.MOREX.r2.1HG0002560,HORVU.MOREX.r2.1HG0002180,HORVU.MOREX.r2.1HG0003500,HORVU.MOREX.r2.1HG0075910,HORVU.MOREX.r2.6HG0513710,HORVU.MOREX.r2.5HG0359480,HORVU.MOREX.r2.1HG0003400,HORVU.MOR…	HORVU.MOREX.r2.5HG0437610,HORVU.MOREX.r2.4HG0276280,HORVU.MOREX.r2.1HG0046460,HORVU.MOREX.r2.5HG0373950,HORVU.MOREX.r2.6HG0513070,HORVU.MOREX.r2.1HG0076230,HORVU.MOREX.r2.6HG0489930,HORVU.MOREX.r2.7HG0606460	HORVU.MOREX.r2.6HG0517950,HORVU.MOREX.r2.6HG0472760,HORVU.MOREX.r2.5HG0417590,HORVU.MOREX.r2.4HG0347970,HORVU.MOREX.r2.5HG0411190,HORVU.MOREX.r2.6HG0467880,HORVU.MOREX.r2.5HG0407870,HORVU.MOREX.r2.5HG0373950,HORVU.MOREX.r2.3HG0205650,HORVU.MOREX.r2.7HG0607290,HORVU.MOREX.r2.3HG0265930,HORVU.MOREX.r2.5HG0437610,HORVU.MOREX.r2.7HG0571570,HORVU.MOREX.r2.1HG0046460,HORVU.MOREX.r2.3HG0252650,HORVU.MOR…	5.17681e-07	0.186678	2.61366e-06
42	31	61	0	2	2	HORVU.MOREX.r2.1HG0003750,HORVU.MOREX.r2.5HG0353950	HORVU.MOREX.r2.5HG0353320,HORVU.MOREX.r2.4HG0339290	HORVU.MOREX.r2.6HG0500330,HORVU.MOREX.r2.2HG0168940,HORVU.MOREX.r2.4HG0339290,HORVU.MOREX.r2.3HG0249280,HORVU.MOREX.r2.5HG0353320,HORVU.MOREX.r2.2HG0179120,HORVU.MOREX.r2.1HG0029250,HORVU.MOREX.r2.5HG0412850,HORVU.MOREX.r2.1HG0061100,HORVU.MOREX.r2.4HG0277470,HORVU.MOREX.r2.3HG0249050,HORVU.MOREX.r2.3HG0249310,HORVU.MOREX.r2.3HG0254180,HORVU.MOREX.r2.2HG0154910,HORVU.MOREX.r2.6HG0516930,HORVU.MOR…	5.76083e-07	0.0725581	2.83926e-06
43	129	272	0	16	35	HORVU.MOREX.r2.1HG0001750,HORVU.MOREX.r2.4HG0345920,HORVU.MOREX.r2.1HG0002560,HORVU.MOREX.r2.1HG0002570,HORVU.MOREX.r2.1HG0003750,HORVU.MOREX.r2.1HG0001030,HORVU.MOREX.r2.4HG0291260,HORVU.MOREX.r2.1HG0003070,HORVU.MOREX.r2.4HG0344720,HORVU.MOREX.r2.3HG0244180,HORVU.MOREX.r2.1HG0002180,HORVU.MOREX.r2.1HG0003500,HORVU.MOREX.r2.1HG0004200,HORVU.MOREX.r2.3HG0244290,HORVU.MOREX.r2.1HG0003400,HORVU.MOR…	HORVU.MOREX.r2.7HG0593780,HORVU.MOREX.r2.7HG0620140,HORVU.MOREX.r2.1HG0019150,HORVU.MOREX.r2.4HG0320470,HORVU.MOREX.r2.1HG0035810,HORVU.MOREX.r2.7HG0552650,HORVU.MOREX.r2.1HG0036700,HORVU.MOREX.r2.5HG0431390,HORVU.MOREX.r2.5HG0435830,HORVU.MOREX.r2.1HG0026120,HORVU.MOREX.r2.3HG0206170,HORVU.MOREX.r2.7HG0559680,HORVU.MOREX.r2.1HG0025620,HORVU.MOREX.r2.5HG0414490,HORVU.MOREX.r2.5HG0428240,HORVU.MOR…	HORVU.MOREX.r2.1HG0046590,HORVU.MOREX.r2.3HG0267030,HORVU.MOREX.r2.6HG0496590,HORVU.MOREX.r2.1HG0068540,HORVU.MOREX.r2.7HG0620140,HORVU.MOREX.r2.7HG0559680,HORVU.MOREX.r2.1HG0035810,HORVU.MOREX.r2.7HG0549780,HORVU.MOREX.r2.1HG0061320,HORVU.MOREX.r2.2HG0172680,HORVU.MOREX.r2.2HG0079860,HORVU.MOREX.r2.5HG0414270,HORVU.MOREX.r2.5HG0427420,HORVU.MOREX.r2.1HG0025620,HORVU.MOREX.r2.3HG0192580,HORVU.MOR…	7.50671e-07	0.389361	3.61369e-06
44	49	36	0	6	7	HORVU.MOREX.r2.7HG0558940,HORVU.MOREX.r2.3HG0262550,HORVU.MOREX.r2.1HG0003750,HORVU.MOREX.r2.1HG0001030,HORVU.MOREX.r2.1HG0046280,HORVU.MOREX.r2.7HG0549450	HORVU.MOREX.r2.3HG0260650,HORVU.MOREX.r2.1HG0046050,HORVU.MOREX.r2.7HG0549430,HORVU.MOREX.r2.1HG0042050,HORVU.MOREX.r2.7HG0549650,HORVU.MOREX.r2.2HG0168470,HORVU.MOREX.r2.7HG0555260	HORVU.MOREX.r2.5HG0388680,HORVU.MOREX.r2.1HG0046050,HORVU.MOREX.r2.3HG0257110,HORVU.MOREX.r2.4HG0343760,HORVU.MOREX.r2.2HG0151900,HORVU.MOREX.r2.6HG0498460,HORVU.MOREX.r2.7HG0619190,HORVU.MOREX.r2.3HG0196860,HORVU.MOREX.r2.4HG0309500,HORVU.MOREX.r2.7HG0566050,HORVU.MOREX.r2.3HG0260650,HORVU.MOREX.r2.5HG0438150,HORVU.MOREX.r2.7HG0532670,HORVU.MOREX.r2.6HG0502970,HORVU.MOREX.r2.1HG0043500,HORVU.MOR…	8.08686e-07	0.175079	3.71996e-06
45	49	142	0	16	7	HORVU.MOREX.r2.2HG0136120,HORVU.MOREX.r2.4HG0336430,HORVU.MOREX.r2.4HG0336570,HORVU.MOREX.r2.2HG0133070,HORVU.MOREX.r2.2HG0136610,HORVU.MOREX.r2.1HG0074000,HORVU.MOREX.r2.1HG0003070,HORVU.MOREX.r2.1HG0067900,HORVU.MOREX.r2.2HG0138110,HORVU.MOREX.r2.2HG0138950,HORVU.MOREX.r2.1HG0003500,HORVU.MOREX.r2.1HG0074020,HORVU.MOREX.r2.2HG0136270,HORVU.MOREX.r2.2HG0136750,HORVU.MOREX.r2.2HG0139240,HORVU.MOR…	HORVU.MOREX.r2.1HG0066740,HORVU.MOREX.r2.3HG0206450,HORVU.MOREX.r2.7HG0596460,HORVU.MOREX.r2.2HG0126140,HORVU.MOREX.r2.4HG0284650,HORVU.MOREX.r2.2HG0102120,HORVU.MOREX.r2.4HG0334570	HORVU.MOREX.r2.3HG0248140,HORVU.MOREX.r2.1HG0013960,HORVU.MOREX.r2.6HG0468640,HORVU.MOREX.r2.5HG0384490,HORVU.MOREX.r2.2HG0126140,HORVU.MOREX.r2.7HG0596460,HORVU.MOREX.r2.1HG0013930,HORVU.MOREX.r2.4HG0349080,HORVU.MOREX.r2.1HG0057520,HORVU.MOREX.r2.1HG0028780,HORVU.MOREX.r2.1HG0052610,HORVU.MOREX.r2.1HG0045430,HORVU.MOREX.r2.5HG0359910,HORVU.MOREX.r2.5HG0440170,HORVU.MOREX.r2.1HG0066750,HORVU.MOR…	8.08686e-07	0.175079	3.71996e-06
46	37	69	0	14	4	HORVU.MOREX.r2.5HG0447180,HORVU.MOREX.r2.2HG0092260,HORVU.MOREX.r2.1HG0078680,HORVU.MOREX.r2.2HG0092100,HORVU.MOREX.r2.1HG0003070,HORVU.MOREX.r2.1HG0003500,HORVU.MOREX.r2.1HG0078200,HORVU.MOREX.r2.1HG0078540,HORVU.MOREX.r2.2HG0092580,HORVU.MOREX.r2.1HG0078050,HORVU.MOREX.r2.UnG0630240,HORVU.MOREX.r2.2HG0092990,HORVU.MOREX.r2.1HG0003400,HORVU.MOREX.r2.1HG0078550	HORVU.MOREX.r2.2HG0121090,HORVU.MOREX.r2.5HG0434000,HORVU.MOREX.r2.2HG0090390,HORVU.MOREX.r2.5HG0445710	HORVU.MOREX.r2.5HG0410500,HORVU.MOREX.r2.6HG0481710,HORVU.MOREX.r2.2HG0090390,HORVU.MOREX.r2.2HG0142820,HORVU.MOREX.r2.3HG0191400,HORVU.MOREX.r2.4HG0317400,HORVU.MOREX.r2.5HG0396860,HORVU.MOREX.r2.4HG0286300,HORVU.MOREX.r2.1HG0045480,HORVU.MOREX.r2.5HG0423520,HORVU.MOREX.r2.2HG0086770,HORVU.MOREX.r2.5HG0387770,HORVU.MOREX.r2.5HG0445710,HORVU.MOREX.r2.7HG0579160,HORVU.MOREX.r2.4HG0282580,HORVU.MOR…	1.39285e-06	0.127478	6.26784e-06
47	51	119	0	11	8	HORVU.MOREX.r2.1HG0001750,HORVU.MOREX.r2.1HG0002560,HORVU.MOREX.r2.1HG0002570,HORVU.MOREX.r2.1HG0003750,HORVU.MOREX.r2.1HG0001030,HORVU.MOREX.r2.4HG0291260,HORVU.MOREX.r2.1HG0003070,HORVU.MOREX.r2.1HG0002180,HORVU.MOREX.r2.1HG0003500,HORVU.MOREX.r2.1HG0003400,HORVU.MOREX.r2.1HG0001710	HORVU.MOREX.r2.5HG0353930,HORVU.MOREX.r2.4HG0337580,HORVU.MOREX.r2.4HG0307100,HORVU.MOREX.r2.3HG0266870,HORVU.MOREX.r2.4HG0329900,HORVU.MOREX.r2.1HG0075740,HORVU.MOREX.r2.5HG0395410,HORVU.MOREX.r2.3HG0219580	HORVU.MOREX.r2.5HG0353930,HORVU.MOREX.r2.3HG0273760,HORVU.MOREX.r2.5HG0357280,HORVU.MOREX.r2.5HG0407600,HORVU.MOREX.r2.5HG0383540,HORVU.MOREX.r2.2HG0082780,HORVU.MOREX.r2.1HG0025000,HORVU.MOREX.r2.2HG0116490,HORVU.MOREX.r2.3HG0194750,HORVU.MOREX.r2.1HG0051930,HORVU.MOREX.r2.5HG0367300,HORVU.MOREX.r2.5HG0352310,HORVU.MOREX.r2.7HG0589320,HORVU.MOREX.r2.5HG0421640,HORVU.MOREX.r2.2HG0177590,HORVU.MOR…	1.47093e-06	0.195438	6.47834e-06
48	33	70	0	3	3	HORVU.MOREX.r2.1HG0003750,HORVU.MOREX.r2.6HG0509850,HORVU.MOREX.r2.1HG0004200	HORVU.MOREX.r2.3HG0236630,HORVU.MOREX.r2.4HG0341140,HORVU.MOREX.r2.7HG0607060	HORVU.MOREX.r2.4HG0341140,HORVU.MOREX.r2.5HG0434880,HORVU.MOREX.r2.1HG0001650,HORVU.MOREX.r2.4HG0322900,HORVU.MOREX.r2.2HG0120800,HORVU.MOREX.r2.5HG0390510,HORVU.MOREX.r2.1HG0005300,HORVU.MOREX.r2.7HG0532380,HORVU.MOREX.r2.3HG0195060,HORVU.MOREX.r2.2HG0109660,HORVU.MOREX.r2.5HG0365770,HORVU.MOREX.r2.3HG0183110,HORVU.MOREX.r2.3HG0236630,HORVU.MOREX.r2.2HG0083760,HORVU.MOREX.r2.5HG0438870,HORVU.MOR…	1.74468e-06	0.10521	7.52395e-06
49	40	74	0	12	5	HORVU.MOREX.r2.UnG0624320,HORVU.MOREX.r2.1HG0001750,HORVU.MOREX.r2.1HG0002560,HORVU.MOREX.r2.1HG0002570,HORVU.MOREX.r2.1HG0003070,HORVU.MOREX.r2.4HG0291260,HORVU.MOREX.r2.2HG0081680,HORVU.MOREX.r2.1HG0002180,HORVU.MOREX.r2.1HG0003500,HORVU.MOREX.r2.2HG0082280,HORVU.MOREX.r2.1HG0003400,HORVU.MOREX.r2.1HG0001710	HORVU.MOREX.r2.2HG0079070,HORVU.MOREX.r2.7HG0562200,HORVU.MOREX.r2.2HG0118970,HORVU.MOREX.r2.2HG0081060,HORVU.MOREX.r2.3HG0206050	HORVU.MOREX.r2.3HG0255810,HORVU.MOREX.r2.6HG0459100,HORVU.MOREX.r2.2HG0118970,HORVU.MOREX.r2.4HG0332480,HORVU.MOREX.r2.3HG0196030,HORVU.MOREX.r2.4HG0332620,HORVU.MOREX.r2.3HG0197840,HORVU.MOREX.r2.1HG0017460,HORVU.MOREX.r2.3HG0226610,HORVU.MOREX.r2.6HG0510060,HORVU.MOREX.r2.7HG0562200,HORVU.MOREX.r2.6HG0474050,HORVU.MOREX.r2.7HG0584040,HORVU.MOREX.r2.4HG0317950,HORVU.MOREX.r2.1HG0039980,HORVU.MOR…	1.805e-06	0.150214	7.62519e-06
50	94	181	0	18	23	HORVU.MOREX.r2.4HG0291260,HORVU.MOREX.r2.1HG0002560,HORVU.MOREX.r2.1HG0002570,HORVU.MOREX.r2.1HG0002180,HORVU.MOREX.r2.3HG0184030,HORVU.MOREX.r2.1HG0001030,HORVU.MOREX.r2.2HG0178910,HORVU.MOREX.r2.1HG0003070,HORVU.MOREX.r2.1HG0003400,HORVU.MOREX.r2.1HG0003750,HORVU.MOREX.r2.1HG0001750,HORVU.MOREX.r2.1HG0003500,HORVU.MOREX.r2.2HG0178800,HORVU.MOREX.r2.3HG0183340,HORVU.MOREX.r2.3HG0183880,HORVU.MOR…	HORVU.MOREX.r2.2HG0130220,HORVU.MOREX.r2.2HG0154390,HORVU.MOREX.r2.2HG0179990,HORVU.MOREX.r2.7HG0621160,HORVU.MOREX.r2.3HG0181790,HORVU.MOREX.r2.5HG0413480,HORVU.MOREX.r2.3HG0249470,HORVU.MOREX.r2.2HG0105990,HORVU.MOREX.r2.7HG0621430,HORVU.MOREX.r2.6HG0522850,HORVU.MOREX.r2.6HG0456710,HORVU.MOREX.r2.1HG0011720,HORVU.MOREX.r2.2HG0098970,HORVU.MOREX.r2.6HG0519460,HORVU.MOREX.r2.7HG0617910,HORVU.MOR…	HORVU.MOREX.r2.4HG0347150,HORVU.MOREX.r2.1HG0066640,HORVU.MOREX.r2.1HG0020240,HORVU.MOREX.r2.1HG0078260,HORVU.MOREX.r2.4HG0339540,HORVU.MOREX.r2.6HG0522850,HORVU.MOREX.r2.7HG0621160,HORVU.MOREX.r2.1HG0011180,HORVU.MOREX.r2.2HG0098970,HORVU.MOREX.r2.4HG0278090,HORVU.MOREX.r2.1HG0046110,HORVU.MOREX.r2.1HG0037140,HORVU.MOREX.r2.2HG0126830,HORVU.MOREX.r2.6HG0461070,HORVU.MOREX.r2.5HG0361750,HORVU.MOR…	2.01401e-06	0.339464	8.33801e-06
51	44	178	0	4	6	HORVU.MOREX.r2.1HG0003070,HORVU.MOREX.r2.1HG0003500,HORVU.MOREX.r2.1HG0003400,HORVU.MOREX.r2.7HG0529070	HORVU.MOREX.r2.4HG0340100,HORVU.MOREX.r2.4HG0280040,HORVU.MOREX.r2.7HG0529450,HORVU.MOREX.r2.6HG0511490,HORVU.MOREX.r2.2HG0148780,HORVU.MOREX.r2.7HG0529030	HORVU.MOREX.r2.6HG0495500,HORVU.MOREX.r2.1HG0048170,HORVU.MOREX.r2.5HG0435380,HORVU.MOREX.r2.6HG0511490,HORVU.MOREX.r2.6HG0505960,HORVU.MOREX.r2.4HG0332620,HORVU.MOREX.r2.2HG0110630,HORVU.MOREX.r2.4HG0287800,HORVU.MOREX.r2.6HG0460340,HORVU.MOREX.r2.5HG0420530,HORVU.MOREX.r2.7HG0605800,HORVU.MOREX.r2.2HG0133920,HORVU.MOREX.r2.7HG0611320,HORVU.MOREX.r2.UnG0626300,HORVU.MOREX.r2.7HG0559890,HORVU.MOR…	2.15231e-06	0.165961	8.73573e-06
52	68	86	0	34	14	HORVU.MOREX.r2.6HG0459490,HORVU.MOREX.r2.2HG0136610,HORVU.MOREX.r2.4HG0291260,HORVU.MOREX.r2.2HG0136750,HORVU.MOREX.r2.6HG0458560,HORVU.MOREX.r2.6HG0458440,HORVU.MOREX.r2.6HG0458540,HORVU.MOREX.r2.6HG0459250,HORVU.MOREX.r2.1HG0078080,HORVU.MOREX.r2.6HG0502370,HORVU.MOREX.r2.2HG0136120,HORVU.MOREX.r2.1HG0002560,HORVU.MOREX.r2.6HG0502880,HORVU.MOREX.r2.1HG0003750,HORVU.MOREX.r2.6HG0503330,HORVU.MOR…	HORVU.MOREX.r2.6HG0518300,HORVU.MOREX.r2.1HG0023130,HORVU.MOREX.r2.1HG0046050,HORVU.MOREX.r2.1HG0026120,HORVU.MOREX.r2.3HG0261030,HORVU.MOREX.r2.3HG0233380,HORVU.MOREX.r2.2HG0096870,HORVU.MOREX.r2.7HG0596370,HORVU.MOREX.r2.6HG0458450,HORVU.MOREX.r2.2HG0093320,HORVU.MOREX.r2.2HG0180380,HORVU.MOREX.r2.2HG0131660,HORVU.MOREX.r2.2HG0096580,HORVU.MOREX.r2.2HG0120940	HORVU.MOREX.r2.6HG0518300,HORVU.MOREX.r2.1HG0046050,HORVU.MOREX.r2.5HG0356540,HORVU.MOREX.r2.7HG0552850,HORVU.MOREX.r2.3HG0231450,HORVU.MOREX.r2.1HG0033460,HORVU.MOREX.r2.2HG0134130,HORVU.MOREX.r2.2HG0096870,HORVU.MOREX.r2.3HG0265360,HORVU.MOREX.r2.3HG0209880,HORVU.MOREX.r2.4HG0324790,HORVU.MOREX.r2.2HG0180380,HORVU.MOREX.r2.2HG0161970,HORVU.MOREX.r2.3HG0198430,HORVU.MOREX.r2.3HG0249610,HORVU.MOR…	2.19448e-06	0.272092	8.73573e-06
53	56	205	0	10	10	HORVU.MOREX.r2.1HG0071030,HORVU.MOREX.r2.1HG0075930,HORVU.MOREX.r2.4HG0336570,HORVU.MOREX.r2.1HG0003070,HORVU.MOREX.r2.4HG0336430,HORVU.MOREX.r2.1HG0003400,HORVU.MOREX.r2.1HG0003500,HORVU.MOREX.r2.1HG0075910,HORVU.MOREX.r2.1HG0003750,HORVU.MOREX.r2.1HG0071140	HORVU.MOREX.r2.1HG0067220,HORVU.MOREX.r2.1HG0071620,HORVU.MOREX.r2.5HG0354360,HORVU.MOREX.r2.3HG0229820,HORVU.MOREX.r2.1HG0071210,HORVU.MOREX.r2.3HG0223560,HORVU.MOREX.r2.7HG0552920,HORVU.MOREX.r2.1HG0071130,HORVU.MOREX.r2.3HG0237450,HORVU.MOREX.r2.6HG0489030	HORVU.MOREX.r2.6HG0462750,HORVU.MOREX.r2.5HG0354360,HORVU.MOREX.r2.3HG0229820,HORVU.MOREX.r2.4HG0320840,HORVU.MOREX.r2.7HG0618500,HORVU.MOREX.r2.1HG0074340,HORVU.MOREX.r2.5HG0365720,HORVU.MOREX.r2.7HG0544280,HORVU.MOREX.r2.7HG0544320,HORVU.MOREX.r2.3HG0215210,HORVU.MOREX.r2.6HG0489030,HORVU.MOREX.r2.1HG0071620,HORVU.MOREX.r2.4HG0334130,HORVU.MOREX.r2.4HG0342020,HORVU.MOREX.r2.3HG0223560,HORVU.MOR…	2.53442e-06	0.228325	9.89859e-06
54	32	47	0	3	3	HORVU.MOREX.r2.1HG0003070,HORVU.MOREX.r2.1HG0003500,HORVU.MOREX.r2.1HG0003400	HORVU.MOREX.r2.2HG0129090,HORVU.MOREX.r2.4HG0327430,HORVU.MOREX.r2.2HG0097620	HORVU.MOREX.r2.7HG0617580,HORVU.MOREX.r2.6HG0523580,HORVU.MOREX.r2.5HG0399590,HORVU.MOREX.r2.5HG0399610,HORVU.MOREX.r2.5HG0370810,HORVU.MOREX.r2.2HG0138120,HORVU.MOREX.r2.4HG0327430,HORVU.MOREX.r2.5HG0399570,HORVU.MOREX.r2.7HG0612430,HORVU.MOREX.r2.1HG0032950,HORVU.MOREX.r2.7HG0563000,HORVU.MOREX.r2.5HG0399500,HORVU.MOREX.r2.1HG0033010,HORVU.MOREX.r2.6HG0493980,HORVU.MOREX.r2.2HG0111940,HORVU.MOR…	3.13598e-06	0.10886	1.20213e-05
55	52	445	0	27	9	HORVU.MOREX.r2.5HG0433720,HORVU.MOREX.r2.5HG0434780,HORVU.MOREX.r2.4HG0291260,HORVU.MOREX.r2.5HG0434820,HORVU.MOREX.r2.5HG0435040,HORVU.MOREX.r2.1HG0001710,HORVU.MOREX.r2.1HG0002560,HORVU.MOREX.r2.5HG0434970,HORVU.MOREX.r2.5HG0434680,HORVU.MOREX.r2.1HG0003500,HORVU.MOREX.r2.5HG0434260,HORVU.MOREX.r2.5HG0434150,HORVU.MOREX.r2.5HG0433840,HORVU.MOREX.r2.5HG0434380,HORVU.MOREX.r2.1HG0003400,HORVU.MOR…	HORVU.MOREX.r2.5HG0435220,HORVU.MOREX.r2.7HG0606030,HORVU.MOREX.r2.7HG0606280,HORVU.MOREX.r2.6HG0455810,HORVU.MOREX.r2.4HG0322020,HORVU.MOREX.r2.3HG0255420,HORVU.MOREX.r2.7HG0606070,HORVU.MOREX.r2.2HG0081770,HORVU.MOREX.r2.7HG0605630	HORVU.MOREX.r2.5HG0435220,HORVU.MOREX.r2.1HG0004830,HORVU.MOREX.r2.2HG0092760,HORVU.MOREX.r2.6HG0453580,HORVU.MOREX.r2.5HG0404000,HORVU.MOREX.r2.7HG0606070,HORVU.MOREX.r2.2HG0081770,HORVU.MOREX.r2.6HG0452280,HORVU.MOREX.r2.6HG0464240,HORVU.MOREX.r2.7HG0606280,HORVU.MOREX.r2.6HG0452310,HORVU.MOREX.r2.6HG0452270,HORVU.MOREX.r2.5HG0434240,HORVU.MOREX.r2.3HG0255420,HORVU.MOREX.r2.7HG0546760,HORVU.MOR…	4.17521e-06	0.219914	1.5714e-05
56	92	160	0	15	23	HORVU.MOREX.r2.6HG0494310,HORVU.MOREX.r2.6HG0494580,HORVU.MOREX.r2.1HG0003750,HORVU.MOREX.r2.1HG0001030,HORVU.MOREX.r2.6HG0464080,HORVU.MOREX.r2.1HG0003070,HORVU.MOREX.r2.6HG0494280,HORVU.MOREX.r2.6HG0495400,HORVU.MOREX.r2.1HG0003500,HORVU.MOREX.r2.6HG0509850,HORVU.MOREX.r2.6HG0495380,HORVU.MOREX.r2.6HG0495440,HORVU.MOREX.r2.1HG0003400,HORVU.MOREX.r2.6HG0495140,HORVU.MOREX.r2.1HG0078080	HORVU.MOREX.r2.4HG0318250,HORVU.MOREX.r2.3HG0255590,HORVU.MOREX.r2.7HG0620300,HORVU.MOREX.r2.6HG0452850,HORVU.MOREX.r2.2HG0093320,HORVU.MOREX.r2.4HG0328370,HORVU.MOREX.r2.7HG0538650,HORVU.MOREX.r2.6HG0463020,HORVU.MOREX.r2.3HG0229090,HORVU.MOREX.r2.3HG0266870,HORVU.MOREX.r2.6HG0494680,HORVU.MOREX.r2.5HG0353140,HORVU.MOREX.r2.5HG0393320,HORVU.MOREX.r2.1HG0043590,HORVU.MOREX.r2.3HG0196530,HORVU.MOR…	HORVU.MOREX.r2.6HG0474240,HORVU.MOREX.r2.3HG0185180,HORVU.MOREX.r2.7HG0550680,HORVU.MOREX.r2.3HG0209880,HORVU.MOREX.r2.6HG0508530,HORVU.MOREX.r2.3HG0252840,HORVU.MOREX.r2.3HG0255590,HORVU.MOREX.r2.3HG0199020,HORVU.MOREX.r2.1HG0057810,HORVU.MOREX.r2.1HG0059060,HORVU.MOREX.r2.6HG0452850,HORVU.MOREX.r2.5HG0387750,HORVU.MOREX.r2.3HG0244300,HORVU.MOREX.r2.4HG0349140,HORVU.MOREX.r2.2HG0091070,HORVU.MOR…	4.5289e-06	0.349443	1.67407e-05
57	31	50	0	3	3	HORVU.MOREX.r2.1HG0003070,HORVU.MOREX.r2.1HG0003500,HORVU.MOREX.r2.1HG0003400	HORVU.MOREX.r2.2HG0175470,HORVU.MOREX.r2.3HG0186000,HORVU.MOREX.r2.7HG0581320	HORVU.MOREX.r2.4HG0346040,HORVU.MOREX.r2.2HG0109000,HORVU.MOREX.r2.6HG0493290,HORVU.MOREX.r2.2HG0151180,HORVU.MOREX.r2.2HG0157290,HORVU.MOREX.r2.6HG0507820,HORVU.MOREX.r2.5HG0372090,HORVU.MOREX.r2.3HG0229430,HORVU.MOREX.r2.7HG0581320,HORVU.MOREX.r2.3HG0205590,HORVU.MOREX.r2.2HG0149220,HORVU.MOREX.r2.1HG0074290,HORVU.MOREX.r2.4HG0346110,HORVU.MOREX.r2.6HG0479210,HORVU.MOREX.r2.6HG0522560,HORVU.MOR…	5.6226e-06	0.11277	2.04189e-05
58	23	67	0	3	1	HORVU.MOREX.r2.1HG0003070,HORVU.MOREX.r2.1HG0003500,HORVU.MOREX.r2.1HG0003400	HORVU.MOREX.r2.6HG0499400	HORVU.MOREX.r2.3HG0232400,HORVU.MOREX.r2.2HG0120910,HORVU.MOREX.r2.5HG0366510,HORVU.MOREX.r2.3HG0258360,HORVU.MOREX.r2.2HG0132820,HORVU.MOREX.r2.5HG0432700,HORVU.MOREX.r2.6HG0457460,HORVU.MOREX.r2.5HG0418360,HORVU.MOREX.r2.7HG0608550,HORVU.MOREX.r2.5HG0414270,HORVU.MOREX.r2.2HG0157100,HORVU.MOREX.r2.5HG0414340,HORVU.MOREX.r2.6HG0499400,HORVU.MOREX.r2.3HG0183480,HORVU.MOREX.r2.3HG0182640,HORVU.MOR…	6.55437e-06	0.0478789	2.33009e-05
59	27	92	0	3	2	HORVU.MOREX.r2.1HG0003070,HORVU.MOREX.r2.1HG0003500,HORVU.MOREX.r2.1HG0003400	HORVU.MOREX.r2.7HG0583410,HORVU.MOREX.r2.3HG0217370	HORVU.MOREX.r2.7HG0613030,HORVU.MOREX.r2.7HG0575810,HORVU.MOREX.r2.7HG0583410,HORVU.MOREX.r2.3HG0260940,HORVU.MOREX.r2.1HG0056230,HORVU.MOREX.r2.1HG0019790,HORVU.MOREX.r2.5HG0393350,HORVU.MOREX.r2.2HG0162570,HORVU.MOREX.r2.UnG0631540,HORVU.MOREX.r2.1HG0001980,HORVU.MOREX.r2.3HG0217370,HORVU.MOREX.r2.2HG0165090,HORVU.MOREX.r2.5HG0406430,HORVU.MOREX.r2.4HG0324960,HORVU.MOREX.r2.5HG0435400,HORVU.MOR…	6.64133e-06	0.0842343	2.33009e-05
60	65	68	0	6	14	HORVU.MOREX.r2.1HG0003750,HORVU.MOREX.r2.1HG0003070,HORVU.MOREX.r2.3HG0181630,HORVU.MOREX.r2.1HG0009580,HORVU.MOREX.r2.1HG0003500,HORVU.MOREX.r2.1HG0003400	HORVU.MOREX.r2.3HG0232070,HORVU.MOREX.r2.5HG0404360,HORVU.MOREX.r2.5HG0402280,HORVU.MOREX.r2.6HG0476630,HORVU.MOREX.r2.1HG0040130,HORVU.MOREX.r2.7HG0599290,HORVU.MOREX.r2.4HG0293280,HORVU.MOREX.r2.2HG0123640,HORVU.MOREX.r2.5HG0370920,HORVU.MOREX.r2.2HG0097170,HORVU.MOREX.r2.3HG0269660,HORVU.MOREX.r2.5HG0381840,HORVU.MOREX.r2.5HG0360220,HORVU.MOREX.r2.3HG0191640	HORVU.MOREX.r2.3HG0196050,HORVU.MOREX.r2.2HG0159680,HORVU.MOREX.r2.5HG0432120,HORVU.MOREX.r2.6HG0513190,HORVU.MOREX.r2.5HG0425670,HORVU.MOREX.r2.7HG0559610,HORVU.MOREX.r2.4HG0293280,HORVU.MOREX.r2.4HG0327900,HORVU.MOREX.r2.2HG0123640,HORVU.MOREX.r2.2HG0164620,HORVU.MOREX.r2.4HG0293270,HORVU.MOREX.r2.3HG0255010,HORVU.MOREX.r2.1HG0060990,HORVU.MOREX.r2.3HG0269660,HORVU.MOREX.r2.5HG0445840,HORVU.MOR…	8.52297e-06	0.28827	2.94043e-05
61	37	33	0	6	5	HORVU.MOREX.r2.5HG0408830,HORVU.MOREX.r2.1HG0003750,HORVU.MOREX.r2.1HG0001030,HORVU.MOREX.r2.1HG0003070,HORVU.MOREX.r2.1HG0003500,HORVU.MOREX.r2.1HG0003400	HORVU.MOREX.r2.5HG0408750,HORVU.MOREX.r2.4HG0323820,HORVU.MOREX.r2.7HG0574980,HORVU.MOREX.r2.1HG0010520,HORVU.MOREX.r2.6HG0510400	HORVU.MOREX.r2.5HG0372130,HORVU.MOREX.r2.7HG0558460,HORVU.MOREX.r2.2HG0122550,HORVU.MOREX.r2.1HG0075170,HORVU.MOREX.r2.7HG0567960,HORVU.MOREX.r2.2HG0143130,HORVU.MOREX.r2.3HG0275670,HORVU.MOREX.r2.4HG0312330,HORVU.MOREX.r2.6HG0451430,HORVU.MOREX.r2.7HG0592280,HORVU.MOREX.r2.2HG0160700,HORVU.MOREX.r2.1HG0058930,HORVU.MOREX.r2.3HG0248610,HORVU.MOREX.r2.5HG0389320,HORVU.MOREX.r2.5HG0373900,HORVU.MOR…	9.2567e-06	0.164394	3.14121e-05
62	40	114	0	13	6	HORVU.MOREX.r2.3HG0232840,HORVU.MOREX.r2.4HG0340600,HORVU.MOREX.r2.1HG0001030,HORVU.MOREX.r2.1HG0003070,HORVU.MOREX.r2.2HG0162750,HORVU.MOREX.r2.4HG0340300,HORVU.MOREX.r2.7HG0600720,HORVU.MOREX.r2.1HG0003500,HORVU.MOREX.r2.4HG0340130,HORVU.MOREX.r2.4HG0340560,HORVU.MOREX.r2.4HG0340570,HORVU.MOREX.r2.1HG0003400,HORVU.MOREX.r2.7HG0600330	HORVU.MOREX.r2.7HG0595920,HORVU.MOREX.r2.5HG0400930,HORVU.MOREX.r2.2HG0162650,HORVU.MOREX.r2.2HG0128230,HORVU.MOREX.r2.3HG0209720,HORVU.MOREX.r2.4HG0340630	HORVU.MOREX.r2.2HG0162650,HORVU.MOREX.r2.7HG0603180,HORVU.MOREX.r2.5HG0404080,HORVU.MOREX.r2.1HG0006660,HORVU.MOREX.r2.3HG0209720,HORVU.MOREX.r2.2HG0096220,HORVU.MOREX.r2.5HG0431380,HORVU.MOREX.r2.2HG0128230,HORVU.MOREX.r2.4HG0335940,HORVU.MOREX.r2.1HG0068990,HORVU.MOREX.r2.4HG0348360,HORVU.MOREX.r2.4HG0348600,HORVU.MOREX.r2.2HG0089210,HORVU.MOREX.r2.5HG0363170,HORVU.MOREX.r2.4HG0288860,HORVU.MOR…	1.05881e-05	0.185634	3.53505e-05
63	94	255	0	21	25	HORVU.MOREX.r2.2HG0136120,HORVU.MOREX.r2.1HG0001750,HORVU.MOREX.r2.6HG0455490,HORVU.MOREX.r2.1HG0002560,HORVU.MOREX.r2.1HG0002570,HORVU.MOREX.r2.3HG0181630,HORVU.MOREX.r2.1HG0003750,HORVU.MOREX.r2.4HG0291260,HORVU.MOREX.r2.1HG0003070,HORVU.MOREX.r2.2HG0138110,HORVU.MOREX.r2.2HG0136610,HORVU.MOREX.r2.1HG0002180,HORVU.MOREX.r2.1HG0003500,HORVU.MOREX.r2.3HG0204200,HORVU.MOREX.r2.2HG0136270,HORVU.MOR…	HORVU.MOREX.r2.3HG0198600,HORVU.MOREX.r2.6HG0455470,HORVU.MOREX.r2.3HG0254300,HORVU.MOREX.r2.4HG0281890,HORVU.MOREX.r2.6HG0496030,HORVU.MOREX.r2.1HG0036700,HORVU.MOREX.r2.7HG0540190,HORVU.MOREX.r2.5HG0430010,HORVU.MOREX.r2.3HG0198590,HORVU.MOREX.r2.6HG0520780,HORVU.MOREX.r2.4HG0291420,HORVU.MOREX.r2.7HG0598490,HORVU.MOREX.r2.3HG0235390,HORVU.MOREX.r2.1HG0019680,HORVU.MOREX.r2.6HG0506610,HORVU.MOR…	HORVU.MOREX.r2.7HG0535240,HORVU.MOREX.r2.6HG0483250,HORVU.MOREX.r2.3HG0198600,HORVU.MOREX.r2.1HG0044450,HORVU.MOREX.r2.3HG0210540,HORVU.MOREX.r2.6HG0455470,HORVU.MOREX.r2.5HG0361560,HORVU.MOREX.r2.5HG0368460,HORVU.MOREX.r2.4HG0323950,HORVU.MOREX.r2.3HG0262260,HORVU.MOREX.r2.2HG0111680,HORVU.MOREX.r2.7HG0585290,HORVU.MOREX.r2.4HG0281100,HORVU.MOREX.r2.3HG0254300,HORVU.MOREX.r2.5HG0405880,HORVU.MOR…	1.61243e-05	0.379989	5.29798e-05
64	29	15	0	3	3	HORVU.MOREX.r2.1HG0003070,HORVU.MOREX.r2.1HG0003500,HORVU.MOREX.r2.1HG0003400	HORVU.MOREX.r2.1HG0033270,HORVU.MOREX.r2.5HG0413530,HORVU.MOREX.r2.5HG0382400	HORVU.MOREX.r2.2HG0150340,HORVU.MOREX.r2.5HG0369230,HORVU.MOREX.r2.1HG0039590,HORVU.MOREX.r2.7HG0553070,HORVU.MOREX.r2.6HG0501080,HORVU.MOREX.r2.3HG0214610,HORVU.MOREX.r2.7HG0552220,HORVU.MOREX.r2.5HG0369380,HORVU.MOREX.r2.5HG0413530,HORVU.MOREX.r2.4HG0343860,HORVU.MOREX.r2.6HG0504040,HORVU.MOREX.r2.1HG0029360,HORVU.MOREX.r2.6HG0521000,HORVU.MOREX.r2.7HG0572070,HORVU.MOREX.r2.3HG0211370,HORVU.MOR…	1.7926e-05	0.121493	5.79793e-05
65	46	136	0	10	8	HORVU.MOREX.r2.1HG0003750,HORVU.MOREX.r2.7HG0598640,HORVU.MOREX.r2.1HG0003070,HORVU.MOREX.r2.7HG0598410,HORVU.MOREX.r2.1HG0003500,HORVU.MOREX.r2.7HG0606100,HORVU.MOREX.r2.7HG0606320,HORVU.MOREX.r2.7HG0598750,HORVU.MOREX.r2.1HG0003400,HORVU.MOREX.r2.7HG0597150	HORVU.MOREX.r2.4HG0314620,HORVU.MOREX.r2.4HG0281280,HORVU.MOREX.r2.7HG0598650,HORVU.MOREX.r2.3HG0240830,HORVU.MOREX.r2.7HG0598870,HORVU.MOREX.r2.7HG0599030,HORVU.MOREX.r2.7HG0605700,HORVU.MOREX.r2.3HG0207620	HORVU.MOREX.r2.2HG0093980,HORVU.MOREX.r2.4HG0289830,HORVU.MOREX.r2.6HG0456120,HORVU.MOREX.r2.7HG0598650,HORVU.MOREX.r2.7HG0599030,HORVU.MOREX.r2.5HG0414910,HORVU.MOREX.r2.7HG0605700,HORVU.MOREX.r2.1HG0036380,HORVU.MOREX.r2.3HG0207620,HORVU.MOREX.r2.2HG0149270,HORVU.MOREX.r2.2HG0175460,HORVU.MOREX.r2.5HG0377040,HORVU.MOREX.r2.7HG0585920,HORVU.MOREX.r2.3HG0240830,HORVU.MOREX.r2.3HG0249610,HORVU.MOR…	1.88129e-05	0.221375	5.9912e-05
66	80	104	0	41	20	HORVU.MOREX.r2.5HG0424830,HORVU.MOREX.r2.5HG0424740,HORVU.MOREX.r2.5HG0423680,HORVU.MOREX.r2.4HG0291260,HORVU.MOREX.r2.4HG0337620,HORVU.MOREX.r2.5HG0426940,HORVU.MOREX.r2.5HG0424260,HORVU.MOREX.r2.1HG0078200,HORVU.MOREX.r2.3HG0268390,HORVU.MOREX.r2.5HG0423510,HORVU.MOREX.r2.5HG0425200,HORVU.MOREX.r2.3HG0268400,HORVU.MOREX.r2.1HG0002560,HORVU.MOREX.r2.1HG0003750,HORVU.MOREX.r2.1HG0001030,HORVU.MOR…	HORVU.MOREX.r2.4HG0294930,HORVU.MOREX.r2.2HG0133370,HORVU.MOREX.r2.4HG0283150,HORVU.MOREX.r2.4HG0343670,HORVU.MOREX.r2.3HG0268300,HORVU.MOREX.r2.5HG0381410,HORVU.MOREX.r2.7HG0611310,HORVU.MOREX.r2.3HG0241080,HORVU.MOREX.r2.4HG0346950,HORVU.MOREX.r2.5HG0425120,HORVU.MOREX.r2.2HG0128230,HORVU.MOREX.r2.1HG0035800,HORVU.MOREX.r2.5HG0427180,HORVU.MOREX.r2.7HG0562200,HORVU.MOREX.r2.3HG0206810,HORVU.MOR…	HORVU.MOREX.r2.5HG0433190,HORVU.MOREX.r2.6HG0525420,HORVU.MOREX.r2.2HG0157350,HORVU.MOREX.r2.5HG0425910,HORVU.MOREX.r2.3HG0231820,HORVU.MOREX.r2.1HG0060220,HORVU.MOREX.r2.3HG0210910,HORVU.MOREX.r2.2HG0157290,HORVU.MOREX.r2.2HG0152680,HORVU.MOREX.r2.7HG0535400,HORVU.MOREX.r2.1HG0021150,HORVU.MOREX.r2.5HG0363170,HORVU.MOREX.r2.1HG0042540,HORVU.MOREX.r2.2HG0124800,HORVU.MOREX.r2.7HG0611310,HORVU.MOR…	2.33358e-05	0.349853	7.31895e-05
67	57	65	0	10	12	HORVU.MOREX.r2.1HG0001750,HORVU.MOREX.r2.1HG0002560,HORVU.MOREX.r2.1HG0002570,HORVU.MOREX.r2.1HG0003750,HORVU.MOREX.r2.4HG0291260,HORVU.MOREX.r2.1HG0003070,HORVU.MOREX.r2.1HG0002180,HORVU.MOREX.r2.1HG0003500,HORVU.MOREX.r2.1HG0003400,HORVU.MOREX.r2.1HG0001710	HORVU.MOREX.r2.2HG0089770,HORVU.MOREX.r2.6HG0486460,HORVU.MOREX.r2.7HG0599500,HORVU.MOREX.r2.3HG0228420,HORVU.MOREX.r2.3HG0201860,HORVU.MOREX.r2.3HG0225010,HORVU.MOREX.r2.4HG0342010,HORVU.MOREX.r2.5HG0430170,HORVU.MOREX.r2.3HG0199170,HORVU.MOREX.r2.1HG0067400,HORVU.MOREX.r2.1HG0023430,HORVU.MOREX.r2.7HG0587300	HORVU.MOREX.r2.7HG0555510,HORVU.MOREX.r2.3HG0266990,HORVU.MOREX.r2.1HG0064720,HORVU.MOREX.r2.7HG0612230,HORVU.MOREX.r2.5HG0430280,HORVU.MOREX.r2.1HG0076940,HORVU.MOREX.r2.6HG0518390,HORVU.MOREX.r2.5HG0406590,HORVU.MOREX.r2.7HG0564020,HORVU.MOREX.r2.3HG0199110,HORVU.MOREX.r2.5HG0429940,HORVU.MOREX.r2.3HG0234560,HORVU.MOREX.r2.5HG0392930,HORVU.MOREX.r2.1HG0023430,HORVU.MOREX.r2.6HG0478620,HORVU.MOR…	2.46675e-05	0.280252	7.62115e-05
68	51	35	0	20	10	HORVU.MOREX.r2.7HG0553840,HORVU.MOREX.r2.5HG0421380,HORVU.MOREX.r2.7HG0551080,HORVU.MOREX.r2.5HG0421500,HORVU.MOREX.r2.1HG0001030,HORVU.MOREX.r2.7HG0554850,HORVU.MOREX.r2.1HG0003070,HORVU.MOREX.r2.5HG0420850,HORVU.MOREX.r2.7HG0549450,HORVU.MOREX.r2.3HG0254820,HORVU.MOREX.r2.1HG0003500,HORVU.MOREX.r2.5HG0421160,HORVU.MOREX.r2.7HG0553740,HORVU.MOREX.r2.7HG0552160,HORVU.MOREX.r2.7HG0554060,HORVU.MOR…	HORVU.MOREX.r2.3HG0220590,HORVU.MOREX.r2.4HG0331030,HORVU.MOREX.r2.2HG0140530,HORVU.MOREX.r2.7HG0577620,HORVU.MOREX.r2.4HG0289480,HORVU.MOREX.r2.7HG0549650,HORVU.MOREX.r2.5HG0420020,HORVU.MOREX.r2.7HG0553660,HORVU.MOREX.r2.3HG0254780,HORVU.MOREX.r2.7HG0579770	HORVU.MOREX.r2.6HG0463520,HORVU.MOREX.r2.7HG0579770,HORVU.MOREX.r2.7HG0558250,HORVU.MOREX.r2.4HG0289480,HORVU.MOREX.r2.4HG0316440,HORVU.MOREX.r2.5HG0420020,HORVU.MOREX.r2.7HG0553660,HORVU.MOREX.r2.1HG0008410,HORVU.MOREX.r2.7HG0547700,HORVU.MOREX.r2.3HG0254780,HORVU.MOREX.r2.6HG0499920,HORVU.MOREX.r2.1HG0056420,HORVU.MOREX.r2.5HG0430050,HORVU.MOREX.r2.4HG0285870,HORVU.MOREX.r2.2HG0172680,HORVU.MOR…	2.83809e-05	0.256425	8.63948e-05
69	36	32	0	2	30	HORVU.MOREX.r2.1HG0001030,HORVU.MOREX.r2.1HG0078080	HORVU.MOREX.r2.4HG0335090,HORVU.MOREX.r2.2HG0105540,HORVU.MOREX.r2.1HG0077450,HORVU.MOREX.r2.7HG0544770,HORVU.MOREX.r2.1HG0078610,HORVU.MOREX.r2.3HG0230700,HORVU.MOREX.r2.6HG0452850,HORVU.MOREX.r2.7HG0578400,HORVU.MOREX.r2.7HG0539680,HORVU.MOREX.r2.1HG0052750,HORVU.MOREX.r2.6HG0456610,HORVU.MOREX.r2.1HG0005360,HORVU.MOREX.r2.5HG0351600,HORVU.MOREX.r2.4HG0330890,HORVU.MOREX.r2.2HG0079590,HORVU.MOR…	HORVU.MOREX.r2.4HG0335090,HORVU.MOREX.r2.2HG0105540,HORVU.MOREX.r2.1HG0077450,HORVU.MOREX.r2.5HG0388330,HORVU.MOREX.r2.7HG0544770,HORVU.MOREX.r2.1HG0078610,HORVU.MOREX.r2.4HG0282630,HORVU.MOREX.r2.6HG0452850,HORVU.MOREX.r2.7HG0578400,HORVU.MOREX.r2.7HG0539680,HORVU.MOREX.r2.1HG0052750,HORVU.MOREX.r2.3HG0258470,HORVU.MOREX.r2.6HG0456610,HORVU.MOREX.r2.1HG0005360,HORVU.MOREX.r2.5HG0351600,HORVU.MOR…	2.96885e-05	5.31566	8.90655e-05
70	59	97	0	12	13	HORVU.MOREX.r2.4HG0291490,HORVU.MOREX.r2.4HG0287820,HORVU.MOREX.r2.4HG0290700,HORVU.MOREX.r2.1HG0003070,HORVU.MOREX.r2.4HG0287760,HORVU.MOREX.r2.4HG0287600,HORVU.MOREX.r2.4HG0288360,HORVU.MOREX.r2.4HG0295370,HORVU.MOREX.r2.1HG0003500,HORVU.MOREX.r2.2HG0114200,HORVU.MOREX.r2.4HG0288290,HORVU.MOREX.r2.1HG0003400	HORVU.MOREX.r2.3HG0240260,HORVU.MOREX.r2.2HG0114300,HORVU.MOREX.r2.4HG0288670,HORVU.MOREX.r2.6HG0496940,HORVU.MOREX.r2.6HG0520040,HORVU.MOREX.r2.2HG0114340,HORVU.MOREX.r2.6HG0462000,HORVU.MOREX.r2.1HG0003210,HORVU.MOREX.r2.3HG0248190,HORVU.MOREX.r2.4HG0346270,HORVU.MOREX.r2.7HG0532400,HORVU.MOREX.r2.5HG0349880,HORVU.MOREX.r2.2HG0111730	HORVU.MOREX.r2.6HG0466110,HORVU.MOREX.r2.7HG0611600,HORVU.MOREX.r2.5HG0400680,HORVU.MOREX.r2.2HG0117500,HORVU.MOREX.r2.1HG0003210,HORVU.MOREX.r2.4HG0288670,HORVU.MOREX.r2.4HG0292580,HORVU.MOREX.r2.7HG0598480,HORVU.MOREX.r2.3HG0239180,HORVU.MOREX.r2.5HG0398160,HORVU.MOREX.r2.6HG0495860,HORVU.MOREX.r2.6HG0520040,HORVU.MOREX.r2.3HG0272820,HORVU.MOREX.r2.4HG0340460,HORVU.MOREX.r2.3HG0182600,HORVU.MOR…	3.53444e-05	0.297009	0.000104518
71	24	37	0	4	2	HORVU.MOREX.r2.1HG0003750,HORVU.MOREX.r2.1HG0003500,HORVU.MOREX.r2.1HG0003400,HORVU.MOREX.r2.1HG0003070	HORVU.MOREX.r2.1HG0014210,HORVU.MOREX.r2.5HG0447050	HORVU.MOREX.r2.2HG0128750,HORVU.MOREX.r2.6HG0495460,HORVU.MOREX.r2.5HG0403680,HORVU.MOREX.r2.2HG0151640,HORVU.MOREX.r2.4HG0290970,HORVU.MOREX.r2.1HG0052200,HORVU.MOREX.r2.3HG0254270,HORVU.MOREX.r2.3HG0260090,HORVU.MOREX.r2.1HG0014210,HORVU.MOREX.r2.3HG0200800,HORVU.MOREX.r2.5HG0376280,HORVU.MOREX.r2.5HG0447050,HORVU.MOREX.r2.2HG0079820,HORVU.MOREX.r2.3HG0187560,HORVU.MOREX.r2.3HG0237720,HORVU.MOR…	4.06222e-05	0.0957779	0.000118434
72	53	159	0	54	11	HORVU.MOREX.r2.5HG0384030,HORVU.MOREX.r2.5HG0384050,HORVU.MOREX.r2.4HG0291260,HORVU.MOREX.r2.5HG0388740,HORVU.MOREX.r2.5HG0374410,HORVU.MOREX.r2.5HG0366280,HORVU.MOREX.r2.1HG0078200,HORVU.MOREX.r2.1HG0078540,HORVU.MOREX.r2.3HG0209440,HORVU.MOREX.r2.7HG0557470,HORVU.MOREX.r2.5HG0375540,HORVU.MOREX.r2.5HG0381870,HORVU.MOREX.r2.1HG0002560,HORVU.MOREX.r2.5HG0382660,HORVU.MOREX.r2.5HG0384070,HORVU.MOR…	HORVU.MOREX.r2.5HG0422830,HORVU.MOREX.r2.4HG0315180,HORVU.MOREX.r2.5HG0378260,HORVU.MOREX.r2.2HG0147710,HORVU.MOREX.r2.4HG0304030,HORVU.MOREX.r2.7HG0560150,HORVU.MOREX.r2.2HG0100960,HORVU.MOREX.r2.7HG0579040,HORVU.MOREX.r2.1HG0073100,HORVU.MOREX.r2.5HG0377220,HORVU.MOREX.r2.2HG0082710	HORVU.MOREX.r2.2HG0098960,HORVU.MOREX.r2.5HG0360130,HORVU.MOREX.r2.3HG0225410,HORVU.MOREX.r2.2HG0091750,HORVU.MOREX.r2.6HG0499090,HORVU.MOREX.r2.4HG0331210,HORVU.MOREX.r2.6HG0515330,HORVU.MOREX.r2.5HG0425760,HORVU.MOREX.r2.2HG0128840,HORVU.MOREX.r2.5HG0363530,HORVU.MOREX.r2.3HG0272870,HORVU.MOREX.r2.4HG0315180,HORVU.MOREX.r2.4HG0304030,HORVU.MOREX.r2.3HG0199620,HORVU.MOREX.r2.7HG0560150,HORVU.MOR…	4.21882e-05	0.275354	0.000121291
73	34	39	0	12	5	HORVU.MOREX.r2.4HG0291260,HORVU.MOREX.r2.1HG0002560,HORVU.MOREX.r2.1HG0002570,HORVU.MOREX.r2.1HG0003750,HORVU.MOREX.r2.1HG0001750,HORVU.MOREX.r2.1HG0003070,HORVU.MOREX.r2.3HG0239810,HORVU.MOREX.r2.3HG0239860,HORVU.MOREX.r2.1HG0002180,HORVU.MOREX.r2.1HG0003500,HORVU.MOREX.r2.1HG0003400,HORVU.MOREX.r2.1HG0001710	HORVU.MOREX.r2.6HG0517380,HORVU.MOREX.r2.6HG0459760,HORVU.MOREX.r2.3HG0240670,HORVU.MOREX.r2.3HG0221490,HORVU.MOREX.r2.2HG0175470	HORVU.MOREX.r2.3HG0257030,HORVU.MOREX.r2.6HG0459760,HORVU.MOREX.r2.7HG0599740,HORVU.MOREX.r2.6HG0517380,HORVU.MOREX.r2.5HG0381560,HORVU.MOREX.r2.3HG0235760,HORVU.MOREX.r2.1HG0077860,HORVU.MOREX.r2.6HG0516630,HORVU.MOREX.r2.2HG0167430,HORVU.MOREX.r2.4HG0290190,HORVU.MOREX.r2.2HG0134730,HORVU.MOREX.r2.3HG0268420,HORVU.MOREX.r2.6HG0513030,HORVU.MOREX.r2.5HG0383850,HORVU.MOREX.r2.2HG0151180,HORVU.MOR…	4.60261e-05	0.181509	0.000130512
74	44	128	0	11	8	HORVU.MOREX.r2.1HG0001750,HORVU.MOREX.r2.1HG0002560,HORVU.MOREX.r2.1HG0002570,HORVU.MOREX.r2.1HG0003750,HORVU.MOREX.r2.1HG0001030,HORVU.MOREX.r2.4HG0291260,HORVU.MOREX.r2.1HG0003070,HORVU.MOREX.r2.1HG0002180,HORVU.MOREX.r2.1HG0003500,HORVU.MOREX.r2.1HG0003400,HORVU.MOREX.r2.1HG0001710	HORVU.MOREX.r2.5HG0379030,HORVU.MOREX.r2.5HG0350030,HORVU.MOREX.r2.7HG0610280,HORVU.MOREX.r2.6HG0501040,HORVU.MOREX.r2.4HG0278810,HORVU.MOREX.r2.6HG0471020,HORVU.MOREX.r2.5HG0369400,HORVU.MOREX.r2.4HG0283500	HORVU.MOREX.r2.7HG0617060,HORVU.MOREX.r2.6HG0471020,HORVU.MOREX.r2.6HG0501040,HORVU.MOREX.r2.4HG0277580,HORVU.MOREX.r2.4HG0343570,HORVU.MOREX.r2.3HG0272070,HORVU.MOREX.r2.7HG0610280,HORVU.MOREX.r2.4HG0282910,HORVU.MOREX.r2.3HG0199220,HORVU.MOREX.r2.1HG0005300,HORVU.MOREX.r2.3HG0227140,HORVU.MOREX.r2.4HG0278810,HORVU.MOREX.r2.4HG0278420,HORVU.MOREX.r2.1HG0041020,HORVU.MOREX.r2.3HG0236250,HORVU.MOR…	5.06708e-05	0.233766	0.000141741
75	143	1914	0	27	46	HORVU.MOREX.r2.7HG0604610,HORVU.MOREX.r2.2HG0143170,HORVU.MOREX.r2.4HG0291260,HORVU.MOREX.r2.4HG0337620,HORVU.MOREX.r2.7HG0541620,HORVU.MOREX.r2.1HG0078200,HORVU.MOREX.r2.1HG0078540,HORVU.MOREX.r2.7HG0604570,HORVU.MOREX.r2.1HG0078080,HORVU.MOREX.r2.1HG0002560,HORVU.MOREX.r2.1HG0003750,HORVU.MOREX.r2.1HG0001030,HORVU.MOREX.r2.1HG0005040,HORVU.MOREX.r2.1HG0003500,HORVU.MOREX.r2.1HG0078050,HORVU.MOR…	HORVU.MOREX.r2.2HG0088730,HORVU.MOREX.r2.2HG0129920,HORVU.MOREX.r2.1HG0023540,HORVU.MOREX.r2.1HG0043060,HORVU.MOREX.r2.7HG0592250,HORVU.MOREX.r2.7HG0558720,HORVU.MOREX.r2.3HG0214280,HORVU.MOREX.r2.1HG0074920,HORVU.MOREX.r2.4HG0330680,HORVU.MOREX.r2.1HG0008950,HORVU.MOREX.r2.5HG0409440,HORVU.MOREX.r2.4HG0283040,HORVU.MOREX.r2.7HG0549490,HORVU.MOREX.r2.1HG0042030,HORVU.MOREX.r2.2HG0135950,HORVU.MOR…	HORVU.MOREX.r2.2HG0129920,HORVU.MOREX.r2.7HG0549490,HORVU.MOREX.r2.4HG0329040,HORVU.MOREX.r2.7HG0537870,HORVU.MOREX.r2.5HG0434930,HORVU.MOREX.r2.5HG0447070,HORVU.MOREX.r2.4HG0337290,HORVU.MOREX.r2.3HG0182390,HORVU.MOREX.r2.4HG0339250,HORVU.MOREX.r2.2HG0128300,HORVU.MOREX.r2.4HG0326700,HORVU.MOREX.r2.3HG0214490,HORVU.MOREX.r2.4HG0332970,HORVU.MOREX.r2.6HG0467890,HORVU.MOREX.r2.7HG0544550,HORVU.MOR…	6.7939e-05	0.496757	0.000185748
76	30	67	0	4	4	HORVU.MOREX.r2.1HG0003070,HORVU.MOREX.r2.1HG0003500,HORVU.MOREX.r2.1HG0003400,HORVU.MOREX.r2.1HG0003750	HORVU.MOREX.r2.1HG0040480,HORVU.MOREX.r2.6HG0490180,HORVU.MOREX.r2.2HG0166910,HORVU.MOREX.r2.3HG0255410	HORVU.MOREX.r2.1HG0040480,HORVU.MOREX.r2.4HG0290070,HORVU.MOREX.r2.2HG0166910,HORVU.MOREX.r2.1HG0049380,HORVU.MOREX.r2.7HG0537330,HORVU.MOREX.r2.3HG0241460,HORVU.MOREX.r2.7HG0529350,HORVU.MOREX.r2.3HG0240030,HORVU.MOREX.r2.1HG0051870,HORVU.MOREX.r2.1HG0006370,HORVU.MOREX.r2.5HG0429310,HORVU.MOREX.r2.2HG0172430,HORVU.MOREX.r2.2HG0145950,HORVU.MOREX.r2.3HG0211370,HORVU.MOREX.r2.7HG0526910,HORVU.MOR…	6.90945e-05	0.162025	0.000185748
77	30	77	0	10	4	HORVU.MOREX.r2.4HG0291260,HORVU.MOREX.r2.1HG0002560,HORVU.MOREX.r2.1HG0002570,HORVU.MOREX.r2.1HG0003750,HORVU.MOREX.r2.1HG0001750,HORVU.MOREX.r2.1HG0003070,HORVU.MOREX.r2.1HG0002180,HORVU.MOREX.r2.1HG0003500,HORVU.MOREX.r2.1HG0003400,HORVU.MOREX.r2.1HG0001710	HORVU.MOREX.r2.5HG0390480,HORVU.MOREX.r2.7HG0596940,HORVU.MOREX.r2.1HG0034980,HORVU.MOREX.r2.1HG0071510	HORVU.MOREX.r2.1HG0067230,HORVU.MOREX.r2.1HG0071510,HORVU.MOREX.r2.2HG0115500,HORVU.MOREX.r2.1HG0063710,HORVU.MOREX.r2.5HG0430160,HORVU.MOREX.r2.7HG0608910,HORVU.MOREX.r2.4HG0320350,HORVU.MOREX.r2.2HG0095380,HORVU.MOREX.r2.3HG0251440,HORVU.MOREX.r2.5HG0390480,HORVU.MOREX.r2.4HG0294180,HORVU.MOREX.r2.7HG0615930,HORVU.MOREX.r2.3HG0267730,HORVU.MOREX.r2.3HG0237800,HORVU.MOREX.r2.7HG0537280,HORVU.MOR…	6.90945e-05	0.162025	0.000185748
78	100	295	0	21	29	HORVU.MOREX.r2.5HG0408830,HORVU.MOREX.r2.4HG0291260,HORVU.MOREX.r2.1HG0002180,HORVU.MOREX.r2.1HG0002570,HORVU.MOREX.r2.7HG0529070,HORVU.MOREX.r2.6HG0503820,HORVU.MOREX.r2.1HG0003750,HORVU.MOREX.r2.3HG0256220,HORVU.MOREX.r2.1HG0003070,HORVU.MOREX.r2.7HG0541620,HORVU.MOREX.r2.1HG0002560,HORVU.MOREX.r2.6HG0465250,HORVU.MOREX.r2.1HG0052210,HORVU.MOREX.r2.1HG0001750,HORVU.MOREX.r2.1HG0003500,HORVU.MOR…	HORVU.MOREX.r2.5HG0360110,HORVU.MOREX.r2.1HG0071020,HORVU.MOREX.r2.5HG0400500,HORVU.MOREX.r2.3HG0251490,HORVU.MOREX.r2.6HG0503680,HORVU.MOREX.r2.7HG0605160,HORVU.MOREX.r2.6HG0509890,HORVU.MOREX.r2.6HG0467950,HORVU.MOREX.r2.5HG0381410,HORVU.MOREX.r2.5HG0409430,HORVU.MOREX.r2.1HG0063050,HORVU.MOREX.r2.5HG0364690,HORVU.MOREX.r2.5HG0408660,HORVU.MOREX.r2.7HG0597050,HORVU.MOREX.r2.4HG0336030,HORVU.MOR…	HORVU.MOREX.r2.5HG0360110,HORVU.MOREX.r2.1HG0044190,HORVU.MOREX.r2.5HG0392170,HORVU.MOREX.r2.5HG0400500,HORVU.MOREX.r2.5HG0360130,HORVU.MOREX.r2.3HG0251490,HORVU.MOREX.r2.5HG0435380,HORVU.MOREX.r2.1HG0071020,HORVU.MOREX.r2.3HG0250890,HORVU.MOREX.r2.6HG0503680,HORVU.MOREX.r2.7HG0605160,HORVU.MOREX.r2.7HG0615100,HORVU.MOREX.r2.2HG0161970,HORVU.MOREX.r2.2HG0100220,HORVU.MOREX.r2.1HG0056760,HORVU.MOR…	7.48564e-05	0.42856	0.000198657
79	26	82	0	10	3	HORVU.MOREX.r2.1HG0078200,HORVU.MOREX.r2.1HG0078680,HORVU.MOREX.r2.1HG0003070,HORVU.MOREX.r2.1HG0078050,HORVU.MOREX.r2.UnG0630240,HORVU.MOREX.r2.1HG0078540,HORVU.MOREX.r2.1HG0003750,HORVU.MOREX.r2.1HG0003500,HORVU.MOREX.r2.1HG0003400,HORVU.MOREX.r2.1HG0078550	HORVU.MOREX.r2.2HG0095540,HORVU.MOREX.r2.3HG0190840,HORVU.MOREX.r2.6HG0523600	HORVU.MOREX.r2.5HG0399490,HORVU.MOREX.r2.7HG0535850,HORVU.MOREX.r2.3HG0247150,HORVU.MOREX.r2.5HG0388530,HORVU.MOREX.r2.2HG0094430,HORVU.MOREX.r2.2HG0120020,HORVU.MOREX.r2.6HG0463900,HORVU.MOREX.r2.3HG0190840,HORVU.MOREX.r2.6HG0458830,HORVU.MOREX.r2.5HG0435960,HORVU.MOREX.r2.2HG0099960,HORVU.MOREX.r2.6HG0523600,HORVU.MOREX.r2.2HG0088380,HORVU.MOREX.r2.3HG0260150,HORVU.MOREX.r2.2HG0095510,HORVU.MOR…	9.96459e-05	0.137422	0.000261098
80	51	326	0	13	11	HORVU.MOREX.r2.3HG0186250,HORVU.MOREX.r2.1HG0003750,HORVU.MOREX.r2.3HG0185980,HORVU.MOREX.r2.1HG0003070,HORVU.MOREX.r2.1HG0005040,HORVU.MOREX.r2.1HG0078050,HORVU.MOREX.r2.1HG0078200,HORVU.MOREX.r2.1HG0078540,HORVU.MOREX.r2.1HG0078680,HORVU.MOREX.r2.1HG0003500,HORVU.MOREX.r2.UnG0630240,HORVU.MOREX.r2.1HG0003400,HORVU.MOREX.r2.1HG0078550	HORVU.MOREX.r2.5HG0422000,HORVU.MOREX.r2.3HG0186230,HORVU.MOREX.r2.5HG0399730,HORVU.MOREX.r2.2HG0083030,HORVU.MOREX.r2.5HG0406360,HORVU.MOREX.r2.7HG0590030,HORVU.MOREX.r2.2HG0132970,HORVU.MOREX.r2.3HG0229040,HORVU.MOREX.r2.6HG0516470,HORVU.MOREX.r2.3HG0185950,HORVU.MOREX.r2.2HG0140540	HORVU.MOREX.r2.5HG0422000,HORVU.MOREX.r2.7HG0539640,HORVU.MOREX.r2.5HG0399730,HORVU.MOREX.r2.5HG0406360,HORVU.MOREX.r2.4HG0308470,HORVU.MOREX.r2.3HG0265360,HORVU.MOREX.r2.7HG0536440,HORVU.MOREX.r2.3HG0186230,HORVU.MOREX.r2.6HG0456190,HORVU.MOREX.r2.7HG0590030,HORVU.MOREX.r2.4HG0283930,HORVU.MOREX.r2.5HG0426690,HORVU.MOREX.r2.3HG0185950,HORVU.MOREX.r2.7HG0567300,HORVU.MOREX.r2.2HG0140540,HORVU.MOR…	0.000104649	0.289237	0.000270779
81	29	69	0	11	4	HORVU.MOREX.r2.4HG0291490,HORVU.MOREX.r2.1HG0003750,HORVU.MOREX.r2.4HG0287820,HORVU.MOREX.r2.4HG0290700,HORVU.MOREX.r2.4HG0287760,HORVU.MOREX.r2.4HG0287600,HORVU.MOREX.r2.4HG0288360,HORVU.MOREX.r2.4HG0295370,HORVU.MOREX.r2.2HG0146390,HORVU.MOREX.r2.4HG0288290,HORVU.MOREX.r2.2HG0146290	HORVU.MOREX.r2.2HG0146380,HORVU.MOREX.r2.2HG0143270,HORVU.MOREX.r2.5HG0360220,HORVU.MOREX.r2.4HG0323730	HORVU.MOREX.r2.5HG0432120,HORVU.MOREX.r2.4HG0344150,HORVU.MOREX.r2.4HG0278140,HORVU.MOREX.r2.1HG0052200,HORVU.MOREX.r2.5HG0423720,HORVU.MOREX.r2.3HG0196030,HORVU.MOREX.r2.3HG0199430,HORVU.MOREX.r2.2HG0143270,HORVU.MOREX.r2.5HG0377040,HORVU.MOREX.r2.5HG0423220,HORVU.MOREX.r2.3HG0242450,HORVU.MOREX.r2.4HG0323730,HORVU.MOREX.r2.5HG0422860,HORVU.MOREX.r2.5HG0356950,HORVU.MOREX.r2.1HG0026490,HORVU.MOR…	0.000118971	0.168539	0.000304038
82	86	526	0	37	24	HORVU.MOREX.r2.5HG0424830,HORVU.MOREX.r2.5HG0424740,HORVU.MOREX.r2.5HG0423680,HORVU.MOREX.r2.2HG0173950,HORVU.MOREX.r2.4HG0291260,HORVU.MOREX.r2.5HG0424260,HORVU.MOREX.r2.1HG0078200,HORVU.MOREX.r2.1HG0078540,HORVU.MOREX.r2.5HG0423510,HORVU.MOREX.r2.1HG0001710,HORVU.MOREX.r2.2HG0173750,HORVU.MOREX.r2.1HG0002560,HORVU.MOREX.r2.1HG0003750,HORVU.MOREX.r2.1HG0001030,HORVU.MOREX.r2.5HG0424020,HORVU.MOR…	HORVU.MOREX.r2.2HG0114700,HORVU.MOREX.r2.4HG0332760,HORVU.MOREX.r2.1HG0071380,HORVU.MOREX.r2.5HG0409330,HORVU.MOREX.r2.2HG0132110,HORVU.MOREX.r2.2HG0172200,HORVU.MOREX.r2.2HG0173510,HORVU.MOREX.r2.2HG0173980,HORVU.MOREX.r2.2HG0172040,HORVU.MOREX.r2.2HG0171560,HORVU.MOREX.r2.2HG0173490,HORVU.MOREX.r2.1HG0015950,HORVU.MOREX.r2.7HG0599320,HORVU.MOREX.r2.2HG0173480,HORVU.MOREX.r2.2HG0172910,HORVU.MOR…	HORVU.MOREX.r2.2HG0173500,HORVU.MOREX.r2.2HG0114700,HORVU.MOREX.r2.6HG0515310,HORVU.MOREX.r2.4HG0332760,HORVU.MOREX.r2.1HG0071380,HORVU.MOREX.r2.5HG0409330,HORVU.MOREX.r2.5HG0356470,HORVU.MOREX.r2.2HG0132110,HORVU.MOREX.r2.6HG0490150,HORVU.MOREX.r2.UnG0625370,HORVU.MOREX.r2.5HG0382410,HORVU.MOREX.r2.4HG0309240,HORVU.MOREX.r2.5HG0356210,HORVU.MOREX.r2.3HG0200750,HORVU.MOREX.r2.6HG0491430,HORVU.MOR…	0.000122269	0.40646	0.000308655
83	22	20	0	9	2	HORVU.MOREX.r2.1HG0078200,HORVU.MOREX.r2.1HG0078680,HORVU.MOREX.r2.1HG0003070,HORVU.MOREX.r2.1HG0078050,HORVU.MOREX.r2.UnG0630240,HORVU.MOREX.r2.1HG0078540,HORVU.MOREX.r2.1HG0003500,HORVU.MOREX.r2.1HG0003400,HORVU.MOREX.r2.1HG0078550	HORVU.MOREX.r2.5HG0402460,HORVU.MOREX.r2.2HG0167330	HORVU.MOREX.r2.7HG0562470,HORVU.MOREX.r2.5HG0416300,HORVU.MOREX.r2.1HG0045470,HORVU.MOREX.r2.3HG0238830,HORVU.MOREX.r2.5HG0439020,HORVU.MOREX.r2.2HG0165100,HORVU.MOREX.r2.2HG0167330,HORVU.MOREX.r2.5HG0427860,HORVU.MOREX.r2.6HG0506450,HORVU.MOREX.r2.1HG0062080,HORVU.MOREX.r2.4HG0319670,HORVU.MOREX.r2.1HG0045810,HORVU.MOREX.r2.5HG0402460,HORVU.MOREX.r2.4HG0307490,HORVU.MOREX.r2.5HG0426070,HORVU.MOR…	0.000134007	0.105397	0.000334211
84	38	114	0	10	7	HORVU.MOREX.r2.1HG0064120,HORVU.MOREX.r2.2HG0106820,HORVU.MOREX.r2.1HG0064940,HORVU.MOREX.r2.1HG0003750,HORVU.MOREX.r2.1HG0003070,HORVU.MOREX.r2.1HG0064460,HORVU.MOREX.r2.1HG0003500,HORVU.MOREX.r2.1HG0064450,HORVU.MOREX.r2.2HG0094240,HORVU.MOREX.r2.1HG0003400	HORVU.MOREX.r2.3HG0193550,HORVU.MOREX.r2.2HG0113860,HORVU.MOREX.r2.3HG0252760,HORVU.MOREX.r2.4HG0282300,HORVU.MOREX.r2.1HG0064560,HORVU.MOREX.r2.1HG0064590,HORVU.MOREX.r2.4HG0334350	HORVU.MOREX.r2.7HG0613370,HORVU.MOREX.r2.7HG0615100,HORVU.MOREX.r2.1HG0075570,HORVU.MOREX.r2.UnG0628900,HORVU.MOREX.r2.3HG0191650,HORVU.MOREX.r2.1HG0046470,HORVU.MOREX.r2.1HG0064590,HORVU.MOREX.r2.3HG0191730,HORVU.MOREX.r2.3HG0252730,HORVU.MOREX.r2.6HG0479380,HORVU.MOREX.r2.4HG0331860,HORVU.MOREX.r2.3HG0209300,HORVU.MOREX.r2.1HG0047820,HORVU.MOREX.r2.1HG0047880,HORVU.MOREX.r2.6HG0521660,HORVU.MOR…	0.000138791	0.237723	0.00034202
85	50	77	0	24	11	HORVU.MOREX.r2.5HG0433720,HORVU.MOREX.r2.5HG0434780,HORVU.MOREX.r2.5HG0434130,HORVU.MOREX.r2.5HG0434820,HORVU.MOREX.r2.5HG0435040,HORVU.MOREX.r2.1HG0038610,HORVU.MOREX.r2.1HG0003750,HORVU.MOREX.r2.1HG0001030,HORVU.MOREX.r2.5HG0434680,HORVU.MOREX.r2.1HG0003500,HORVU.MOREX.r2.5HG0434260,HORVU.MOREX.r2.5HG0434150,HORVU.MOREX.r2.5HG0433840,HORVU.MOREX.r2.5HG0434380,HORVU.MOREX.r2.1HG0003400,HORVU.MOR…	HORVU.MOREX.r2.2HG0131440,HORVU.MOREX.r2.5HG0414750,HORVU.MOREX.r2.1HG0030330,HORVU.MOREX.r2.6HG0503470,HORVU.MOREX.r2.4HG0338680,HORVU.MOREX.r2.5HG0434860,HORVU.MOREX.r2.4HG0295820,HORVU.MOREX.r2.5HG0434830,HORVU.MOREX.r2.5HG0446420,HORVU.MOREX.r2.UnG0633100,HORVU.MOREX.r2.1HG0033960	HORVU.MOREX.r2.6HG0496570,HORVU.MOREX.r2.5HG0369230,HORVU.MOREX.r2.2HG0131440,HORVU.MOREX.r2.4HG0298830,HORVU.MOREX.r2.4HG0295820,HORVU.MOREX.r2.7HG0621270,HORVU.MOREX.r2.1HG0014190,HORVU.MOREX.r2.6HG0468110,HORVU.MOREX.r2.UnG0633100,HORVU.MOREX.r2.5HG0390690,HORVU.MOREX.r2.2HG0151740,HORVU.MOREX.r2.5HG0414750,HORVU.MOREX.r2.1HG0030330,HORVU.MOREX.r2.5HG0369270,HORVU.MOREX.r2.2HG0090820,HORVU.MOR…	0.000163625	0.296713	0.000393843
86	50	180	0	18	11	HORVU.MOREX.r2.1HG0001710,HORVU.MOREX.r2.5HG0438210,HORVU.MOREX.r2.1HG0001750,HORVU.MOREX.r2.5HG0437570,HORVU.MOREX.r2.5HG0437790,HORVU.MOREX.r2.1HG0003750,HORVU.MOREX.r2.1HG0001030,HORVU.MOREX.r2.4HG0291260,HORVU.MOREX.r2.1HG0003070,HORVU.MOREX.r2.5HG0437490,HORVU.MOREX.r2.7HG0597150,HORVU.MOREX.r2.1HG0002180,HORVU.MOREX.r2.1HG0003500,HORVU.MOREX.r2.1HG0002570,HORVU.MOREX.r2.1HG0004200,HORVU.MOR…	HORVU.MOREX.r2.1HG0040870,HORVU.MOREX.r2.1HG0060710,HORVU.MOREX.r2.1HG0057800,HORVU.MOREX.r2.1HG0019030,HORVU.MOREX.r2.7HG0567190,HORVU.MOREX.r2.5HG0380850,HORVU.MOREX.r2.5HG0437290,HORVU.MOREX.r2.3HG0212660,HORVU.MOREX.r2.5HG0385110,HORVU.MOREX.r2.7HG0598420,HORVU.MOREX.r2.7HG0591440	HORVU.MOREX.r2.2HG0100210,HORVU.MOREX.r2.6HG0477020,HORVU.MOREX.r2.1HG0060710,HORVU.MOREX.r2.1HG0040870,HORVU.MOREX.r2.4HG0295780,HORVU.MOREX.r2.6HG0456510,HORVU.MOREX.r2.5HG0380850,HORVU.MOREX.r2.7HG0598420,HORVU.MOREX.r2.7HG0591440,HORVU.MOREX.r2.2HG0126830,HORVU.MOREX.r2.5HG0433020,HORVU.MOREX.r2.2HG0083700,HORVU.MOREX.r2.1HG0057800,HORVU.MOREX.r2.4HG0278110,HORVU.MOREX.r2.7HG0564570,HORVU.MOR…	0.000163625	0.296713	0.000393843
87	25	26	0	5	3	HORVU.MOREX.r2.1HG0003070,HORVU.MOREX.r2.1HG0001030,HORVU.MOREX.r2.1HG0003500,HORVU.MOREX.r2.1HG0003400,HORVU.MOREX.r2.1HG0003750	HORVU.MOREX.r2.7HG0600110,HORVU.MOREX.r2.2HG0164500,HORVU.MOREX.r2.5HG0437030	HORVU.MOREX.r2.2HG0116140,HORVU.MOREX.r2.5HG0385220,HORVU.MOREX.r2.5HG0390920,HORVU.MOREX.r2.2HG0152680,HORVU.MOREX.r2.1HG0038420,HORVU.MOREX.r2.6HG0495960,HORVU.MOREX.r2.5HG0396700,HORVU.MOREX.r2.6HG0519020,HORVU.MOREX.r2.2HG0164500,HORVU.MOREX.r2.7HG0577000,HORVU.MOREX.r2.3HG0252020,HORVU.MOREX.r2.7HG0600110,HORVU.MOREX.r2.1HG0049480,HORVU.MOREX.r2.6HG0471070,HORVU.MOREX.r2.1HG0045480,HORVU.MOR…	0.000175218	0.143697	0.000416898
88	34	76	0	9	6	HORVU.MOREX.r2.1HG0003750,HORVU.MOREX.r2.2HG0099480,HORVU.MOREX.r2.1HG0003070,HORVU.MOREX.r2.2HG0099640,HORVU.MOREX.r2.7HG0615500,HORVU.MOREX.r2.1HG0003500,HORVU.MOREX.r2.2HG0175120,HORVU.MOREX.r2.1HG0003400,HORVU.MOREX.r2.2HG0099970	HORVU.MOREX.r2.4HG0315180,HORVU.MOREX.r2.6HG0511430,HORVU.MOREX.r2.2HG0101680,HORVU.MOREX.r2.3HG0254920,HORVU.MOREX.r2.3HG0253010,HORVU.MOREX.r2.2HG0178250	HORVU.MOREX.r2.2HG0147270,HORVU.MOREX.r2.3HG0246040,HORVU.MOREX.r2.3HG0273760,HORVU.MOREX.r2.2HG0085920,HORVU.MOREX.r2.2HG0091750,HORVU.MOREX.r2.7HG0565000,HORVU.MOREX.r2.5HG0423800,HORVU.MOREX.r2.7HG0547510,HORVU.MOREX.r2.5HG0386790,HORVU.MOREX.r2.2HG0178250,HORVU.MOREX.r2.4HG0315180,HORVU.MOREX.r2.5HG0386780,HORVU.MOREX.r2.4HG0275890,HORVU.MOREX.r2.6HG0511430,HORVU.MOREX.r2.1HG0055800,HORVU.MOR…	0.000226889	0.225682	0.000533704
89	62	89	0	13	16	HORVU.MOREX.r2.2HG0161300,HORVU.MOREX.r2.2HG0161940,HORVU.MOREX.r2.6HG0497740,HORVU.MOREX.r2.2HG0161480,HORVU.MOREX.r2.6HG0501180,HORVU.MOREX.r2.2HG0162210,HORVU.MOREX.r2.1HG0003070,HORVU.MOREX.r2.2HG0160980,HORVU.MOREX.r2.6HG0497600,HORVU.MOREX.r2.1HG0003500,HORVU.MOREX.r2.1HG0006400,HORVU.MOREX.r2.1HG0003400,HORVU.MOREX.r2.6HG0497450	HORVU.MOREX.r2.6HG0501250,HORVU.MOREX.r2.6HG0497530,HORVU.MOREX.r2.2HG0131360,HORVU.MOREX.r2.4HG0330800,HORVU.MOREX.r2.5HG0412280,HORVU.MOREX.r2.2HG0108210,HORVU.MOREX.r2.6HG0475080,HORVU.MOREX.r2.7HG0545250,HORVU.MOREX.r2.4HG0343650,HORVU.MOREX.r2.1HG0010770,HORVU.MOREX.r2.3HG0254850,HORVU.MOREX.r2.2HG0161390,HORVU.MOREX.r2.2HG0108200,HORVU.MOREX.r2.6HG0494650,HORVU.MOREX.r2.2HG0146780,HORVU.MOR…	HORVU.MOREX.r2.7HG0587840,HORVU.MOREX.r2.4HG0331590,HORVU.MOREX.r2.4HG0330800,HORVU.MOREX.r2.5HG0361370,HORVU.MOREX.r2.2HG0108210,HORVU.MOREX.r2.3HG0229470,HORVU.MOREX.r2.3HG0244620,HORVU.MOREX.r2.7HG0595440,HORVU.MOREX.r2.5HG0447000,HORVU.MOREX.r2.5HG0354910,HORVU.MOREX.r2.2HG0177710,HORVU.MOREX.r2.7HG0583610,HORVU.MOREX.r2.4HG0286180,HORVU.MOREX.r2.5HG0390310,HORVU.MOREX.r2.2HG0142690,HORVU.MOR…	0.000299652	0.365779	0.000696943
90	88	1913	0	64	26	HORVU.MOREX.r2.5HG0418880,HORVU.MOREX.r2.4HG0326250,HORVU.MOREX.r2.1HG0058540,HORVU.MOREX.r2.6HG0455770,HORVU.MOREX.r2.6HG0455430,HORVU.MOREX.r2.5HG0417610,HORVU.MOREX.r2.1HG0060260,HORVU.MOREX.r2.6HG0501240,HORVU.MOREX.r2.7HG0543070,HORVU.MOREX.r2.1HG0059020,HORVU.MOREX.r2.1HG0058190,HORVU.MOREX.r2.2HG0157590,HORVU.MOREX.r2.7HG0557470,HORVU.MOREX.r2.1HG0066070,HORVU.MOREX.r2.1HG0059000,HORVU.MOR…	HORVU.MOREX.r2.5HG0419280,HORVU.MOREX.r2.7HG0560290,HORVU.MOREX.r2.5HG0420020,HORVU.MOREX.r2.7HG0556600,HORVU.MOREX.r2.5HG0417030,HORVU.MOREX.r2.5HG0421070,HORVU.MOREX.r2.5HG0419500,HORVU.MOREX.r2.7HG0557830,HORVU.MOREX.r2.5HG0420070,HORVU.MOREX.r2.7HG0559880,HORVU.MOREX.r2.7HG0559920,HORVU.MOREX.r2.5HG0420790,HORVU.MOREX.r2.5HG0417140,HORVU.MOREX.r2.7HG0556400,HORVU.MOREX.r2.4HG0310090,HORVU.MOR…	HORVU.MOREX.r2.5HG0419280,HORVU.MOREX.r2.7HG0560290,HORVU.MOREX.r2.5HG0420020,HORVU.MOREX.r2.7HG0556600,HORVU.MOREX.r2.5HG0417030,HORVU.MOREX.r2.5HG0421070,HORVU.MOREX.r2.5HG0419500,HORVU.MOREX.r2.7HG0557830,HORVU.MOREX.r2.5HG0420070,HORVU.MOREX.r2.7HG0559880,HORVU.MOREX.r2.7HG0559920,HORVU.MOREX.r2.5HG0420790,HORVU.MOREX.r2.5HG0417140,HORVU.MOREX.r2.2HG0152120,HORVU.MOREX.r2.7HG0556400,HORVU.MOR…	0.000354498	0.440517	0.000815346
91	33	55	0	7	6	HORVU.MOREX.r2.7HG0603380,HORVU.MOREX.r2.1HG0001030,HORVU.MOREX.r2.1HG0003070,HORVU.MOREX.r2.7HG0608850,HORVU.MOREX.r2.1HG0003500,HORVU.MOREX.r2.7HG0609190,HORVU.MOREX.r2.1HG0003400	HORVU.MOREX.r2.2HG0149430,HORVU.MOREX.r2.3HG0260790,HORVU.MOREX.r2.7HG0604010,HORVU.MOREX.r2.7HG0608730,HORVU.MOREX.r2.7HG0610200,HORVU.MOREX.r2.7HG0609060	HORVU.MOREX.r2.2HG0157350,HORVU.MOREX.r2.3HG0187230,HORVU.MOREX.r2.7HG0604010,HORVU.MOREX.r2.2HG0098360,HORVU.MOREX.r2.4HG0307580,HORVU.MOREX.r2.7HG0534500,HORVU.MOREX.r2.5HG0402780,HORVU.MOREX.r2.6HG0507270,HORVU.MOREX.r2.6HG0508580,HORVU.MOREX.r2.4HG0344990,HORVU.MOREX.r2.5HG0389580,HORVU.MOREX.r2.5HG0355500,HORVU.MOREX.r2.2HG0149430,HORVU.MOREX.r2.3HG0260790,HORVU.MOREX.r2.7HG0555300,HORVU.MOR…	0.000372071	0.234087	0.00084636
92	56	116	0	12	14	HORVU.MOREX.r2.3HG0187530,HORVU.MOREX.r2.1HG0048540,HORVU.MOREX.r2.1HG0003750,HORVU.MOREX.r2.1HG0001030,HORVU.MOREX.r2.1HG0003070,HORVU.MOREX.r2.3HG0187650,HORVU.MOREX.r2.7HG0567710,HORVU.MOREX.r2.1HG0003500,HORVU.MOREX.r2.3HG0187370,HORVU.MOREX.r2.7HG0566960,HORVU.MOREX.r2.7HG0599310,HORVU.MOREX.r2.1HG0003400	HORVU.MOREX.r2.2HG0119140,HORVU.MOREX.r2.3HG0188960,HORVU.MOREX.r2.5HG0389750,HORVU.MOREX.r2.7HG0573800,HORVU.MOREX.r2.1HG0071390,HORVU.MOREX.r2.3HG0246770,HORVU.MOREX.r2.7HG0597660,HORVU.MOREX.r2.7HG0569490,HORVU.MOREX.r2.1HG0050800,HORVU.MOREX.r2.7HG0598590,HORVU.MOREX.r2.5HG0441050,HORVU.MOREX.r2.1HG0048090,HORVU.MOREX.r2.4HG0282730,HORVU.MOREX.r2.7HG0598010	HORVU.MOREX.r2.3HG0216640,HORVU.MOREX.r2.4HG0281100,HORVU.MOREX.r2.7HG0589610,HORVU.MOREX.r2.4HG0282730,HORVU.MOREX.r2.4HG0338140,HORVU.MOREX.r2.2HG0119140,HORVU.MOREX.r2.5HG0389750,HORVU.MOREX.r2.2HG0170530,HORVU.MOREX.r2.7HG0554000,HORVU.MOREX.r2.3HG0181450,HORVU.MOREX.r2.7HG0573800,HORVU.MOREX.r2.7HG0597660,HORVU.MOREX.r2.3HG0229450,HORVU.MOREX.r2.7HG0559960,HORVU.MOREX.r2.5HG0441050,HORVU.MOR…	0.000400398	0.350671	0.000900896
93	23	43	0	4	3	HORVU.MOREX.r2.1HG0003750,HORVU.MOREX.r2.1HG0003500,HORVU.MOREX.r2.1HG0003400,HORVU.MOREX.r2.1HG0003070	HORVU.MOREX.r2.5HG0388170,HORVU.MOREX.r2.4HG0334150,HORVU.MOREX.r2.4HG0332140	HORVU.MOREX.r2.4HG0334150,HORVU.MOREX.r2.3HG0233030,HORVU.MOREX.r2.4HG0332140,HORVU.MOREX.r2.2HG0132890,HORVU.MOREX.r2.3HG0195910,HORVU.MOREX.r2.3HG0272890,HORVU.MOREX.r2.1HG0049150,HORVU.MOREX.r2.1HG0017990,HORVU.MOREX.r2.3HG0201620,HORVU.MOREX.r2.1HG0020280,HORVU.MOREX.r2.5HG0388170,HORVU.MOREX.r2.5HG0427530,HORVU.MOREX.r2.7HG0535190,HORVU.MOREX.r2.7HG0598080,HORVU.MOREX.r2.6HG0498980,HORVU.MOR…	0.000534754	0.158129	0.0011776
94	23	28	0	4	3	HORVU.MOREX.r2.1HG0003070,HORVU.MOREX.r2.1HG0001030,HORVU.MOREX.r2.1HG0003500,HORVU.MOREX.r2.1HG0003400	HORVU.MOREX.r2.5HG0446280,HORVU.MOREX.r2.2HG0091370,HORVU.MOREX.r2.7HG0552030	HORVU.MOREX.r2.5HG0446280,HORVU.MOREX.r2.2HG0091370,HORVU.MOREX.r2.7HG0547640,HORVU.MOREX.r2.3HG0197460,HORVU.MOREX.r2.4HG0333430,HORVU.MOREX.r2.2HG0091390,HORVU.MOREX.r2.6HG0509430,HORVU.MOREX.r2.UnG0626200,HORVU.MOREX.r2.2HG0114000,HORVU.MOREX.r2.5HG0365720,HORVU.MOREX.r2.7HG0554020,HORVU.MOREX.r2.7HG0552030,HORVU.MOREX.r2.3HG0191990,HORVU.MOREX.r2.3HG0191980,HORVU.MOREX.r2.7HG0555590,HORVU.MOR…	0.000534754	0.158129	0.0011776
95	35	66	0	6	7	HORVU.MOREX.r2.1HG0001030,HORVU.MOREX.r2.1HG0003070,HORVU.MOREX.r2.3HG0232840,HORVU.MOREX.r2.1HG0003500,HORVU.MOREX.r2.1HG0003400,HORVU.MOREX.r2.1HG0000450	HORVU.MOREX.r2.3HG0233190,HORVU.MOREX.r2.3HG0189870,HORVU.MOREX.r2.1HG0000700,HORVU.MOREX.r2.4HG0323250,HORVU.MOREX.r2.3HG0242970,HORVU.MOREX.r2.3HG0208240,HORVU.MOREX.r2.3HG0229070	HORVU.MOREX.r2.3HG0233190,HORVU.MOREX.r2.2HG0106780,HORVU.MOREX.r2.6HG0525010,HORVU.MOREX.r2.5HG0368990,HORVU.MOREX.r2.3HG0242970,HORVU.MOREX.r2.5HG0354620,HORVU.MOREX.r2.6HG0515330,HORVU.MOREX.r2.3HG0197300,HORVU.MOREX.r2.6HG0498920,HORVU.MOREX.r2.6HG0482600,HORVU.MOREX.r2.2HG0160680,HORVU.MOREX.r2.3HG0229070,HORVU.MOREX.r2.3HG0189870,HORVU.MOREX.r2.4HG0346290,HORVU.MOREX.r2.1HG0000700,HORVU.MOR…	0.000583819	0.263351	0.00127211
96	55	26	0	21	14	HORVU.MOREX.r2.2HG0143420,HORVU.MOREX.r2.4HG0291260,HORVU.MOREX.r2.1HG0002560,HORVU.MOREX.r2.1HG0002570,HORVU.MOREX.r2.1HG0002180,HORVU.MOREX.r2.4HG0291490,HORVU.MOREX.r2.1HG0003750,HORVU.MOREX.r2.4HG0287820,HORVU.MOREX.r2.4HG0290700,HORVU.MOREX.r2.1HG0003070,HORVU.MOREX.r2.4HG0287760,HORVU.MOREX.r2.4HG0287600,HORVU.MOREX.r2.4HG0288360,HORVU.MOREX.r2.4HG0295370,HORVU.MOREX.r2.1HG0001750,HORVU.MOR…	HORVU.MOREX.r2.5HG0360530,HORVU.MOREX.r2.4HG0320930,HORVU.MOREX.r2.1HG0077450,HORVU.MOREX.r2.7HG0586250,HORVU.MOREX.r2.7HG0588110,HORVU.MOREX.r2.7HG0573050,HORVU.MOREX.r2.3HG0237090,HORVU.MOREX.r2.3HG0199170,HORVU.MOREX.r2.4HG0337430,HORVU.MOREX.r2.5HG0410240,HORVU.MOREX.r2.2HG0143070,HORVU.MOREX.r2.7HG0568980,HORVU.MOREX.r2.2HG0137070,HORVU.MOREX.r2.7HG0586260	HORVU.MOREX.r2.4HG0334620,HORVU.MOREX.r2.6HG0514050,HORVU.MOREX.r2.1HG0077450,HORVU.MOREX.r2.2HG0154740,HORVU.MOREX.r2.7HG0588110,HORVU.MOREX.r2.7HG0573050,HORVU.MOREX.r2.UnG0630350,HORVU.MOREX.r2.4HG0284720,HORVU.MOREX.r2.2HG0175920,HORVU.MOREX.r2.5HG0349640,HORVU.MOREX.r2.5HG0401830,HORVU.MOREX.r2.7HG0568980,HORVU.MOREX.r2.2HG0143040,HORVU.MOREX.r2.2HG0175910,HORVU.MOREX.r2.7HG0534180,HORVU.MOR…	0.000599528	0.359296	0.00129273
97	44	63	0	14	10	HORVU.MOREX.r2.7HG0553840,HORVU.MOREX.r2.7HG0551080,HORVU.MOREX.r2.4HG0342570,HORVU.MOREX.r2.1HG0003750,HORVU.MOREX.r2.1HG0001030,HORVU.MOREX.r2.7HG0554850,HORVU.MOREX.r2.1HG0003070,HORVU.MOREX.r2.7HG0554060,HORVU.MOREX.r2.7HG0552160,HORVU.MOREX.r2.1HG0003500,HORVU.MOREX.r2.7HG0553740,HORVU.MOREX.r2.4HG0343120,HORVU.MOREX.r2.7HG0552580,HORVU.MOREX.r2.1HG0003400	HORVU.MOREX.r2.1HG0023120,HORVU.MOREX.r2.4HG0342150,HORVU.MOREX.r2.6HG0511270,HORVU.MOREX.r2.4HG0294660,HORVU.MOREX.r2.1HG0041270,HORVU.MOREX.r2.6HG0461740,HORVU.MOREX.r2.6HG0501410,HORVU.MOREX.r2.7HG0551550,HORVU.MOREX.r2.1HG0000470,HORVU.MOREX.r2.7HG0551540	HORVU.MOREX.r2.3HG0260960,HORVU.MOREX.r2.7HG0598160,HORVU.MOREX.r2.1HG0059670,HORVU.MOREX.r2.2HG0096570,HORVU.MOREX.r2.6HG0526520,HORVU.MOREX.r2.5HG0385760,HORVU.MOREX.r2.7HG0551540,HORVU.MOREX.r2.4HG0323910,HORVU.MOREX.r2.3HG0254290,HORVU.MOREX.r2.7HG0559870,HORVU.MOREX.r2.2HG0175140,HORVU.MOREX.r2.1HG0049300,HORVU.MOREX.r2.4HG0294660,HORVU.MOREX.r2.6HG0501410,HORVU.MOREX.r2.2HG0171370,HORVU.MOR…	0.000689693	0.309649	0.0014327
98	44	79	0	15	10	HORVU.MOREX.r2.7HG0615630,HORVU.MOREX.r2.2HG0102350,HORVU.MOREX.r2.1HG0003750,HORVU.MOREX.r2.2HG0102520,HORVU.MOREX.r2.1HG0003070,HORVU.MOREX.r2.7HG0617100,HORVU.MOREX.r2.7HG0615910,HORVU.MOREX.r2.2HG0104620,HORVU.MOREX.r2.1HG0003500,HORVU.MOREX.r2.1HG0078620,HORVU.MOREX.r2.2HG0102660,HORVU.MOREX.r2.7HG0617000,HORVU.MOREX.r2.1HG0005040,HORVU.MOREX.r2.1HG0003400,HORVU.MOREX.r2.2HG0102770	HORVU.MOREX.r2.4HG0281710,HORVU.MOREX.r2.6HG0473830,HORVU.MOREX.r2.7HG0615610,HORVU.MOREX.r2.7HG0558000,HORVU.MOREX.r2.7HG0598390,HORVU.MOREX.r2.2HG0102680,HORVU.MOREX.r2.2HG0101820,HORVU.MOREX.r2.4HG0304310,HORVU.MOREX.r2.5HG0414440,HORVU.MOREX.r2.1HG0058060	HORVU.MOREX.r2.6HG0524330,HORVU.MOREX.r2.7HG0615610,HORVU.MOREX.r2.4HG0278080,HORVU.MOREX.r2.4HG0281710,HORVU.MOREX.r2.3HG0238690,HORVU.MOREX.r2.6HG0462840,HORVU.MOREX.r2.5HG0396400,HORVU.MOREX.r2.4HG0347780,HORVU.MOREX.r2.2HG0088790,HORVU.MOREX.r2.1HG0049040,HORVU.MOREX.r2.6HG0511040,HORVU.MOREX.r2.2HG0102680,HORVU.MOREX.r2.2HG0101820,HORVU.MOREX.r2.6HG0471460,HORVU.MOREX.r2.4HG0333620,HORVU.MOR…	0.000689693	0.309649	0.0014327
99	44	114	0	20	10	HORVU.MOREX.r2.1HG0001710,HORVU.MOREX.r2.4HG0321060,HORVU.MOREX.r2.4HG0321070,HORVU.MOREX.r2.4HG0320920,HORVU.MOREX.r2.4HG0321730,HORVU.MOREX.r2.1HG0002570,HORVU.MOREX.r2.4HG0321200,HORVU.MOREX.r2.1HG0003750,HORVU.MOREX.r2.1HG0001030,HORVU.MOREX.r2.4HG0291260,HORVU.MOREX.r2.1HG0003070,HORVU.MOREX.r2.1HG0002560,HORVU.MOREX.r2.1HG0002180,HORVU.MOREX.r2.1HG0001750,HORVU.MOREX.r2.4HG0321340,HORVU.MOR…	HORVU.MOREX.r2.4HG0320420,HORVU.MOREX.r2.3HG0245680,HORVU.MOREX.r2.1HG0047450,HORVU.MOREX.r2.4HG0321470,HORVU.MOREX.r2.1HG0043750,HORVU.MOREX.r2.5HG0444660,HORVU.MOREX.r2.3HG0209460,HORVU.MOREX.r2.5HG0350890,HORVU.MOREX.r2.4HG0343790,HORVU.MOREX.r2.4HG0321020	HORVU.MOREX.r2.1HG0057460,HORVU.MOREX.r2.2HG0180540,HORVU.MOREX.r2.4HG0348350,HORVU.MOREX.r2.3HG0264650,HORVU.MOREX.r2.3HG0245680,HORVU.MOREX.r2.3HG0209460,HORVU.MOREX.r2.1HG0051580,HORVU.MOREX.r2.4HG0346300,HORVU.MOREX.r2.4HG0321020,HORVU.MOREX.r2.4HG0346310,HORVU.MOREX.r2.1HG0034670,HORVU.MOREX.r2.7HG0551980,HORVU.MOREX.r2.7HG0559960,HORVU.MOREX.r2.5HG0350890,HORVU.MOREX.r2.4HG0342990,HORVU.MOR…	0.000689693	0.309649	0.0014327
100	65	58	0	18	18	HORVU.MOREX.r2.1HG0001750,HORVU.MOREX.r2.7HG0561540,HORVU.MOREX.r2.4HG0291260,HORVU.MOREX.r2.7HG0561480,HORVU.MOREX.r2.1HG0002560,HORVU.MOREX.r2.1HG0002570,HORVU.MOREX.r2.1HG0002180,HORVU.MOREX.r2.1HG0003750,HORVU.MOREX.r2.1HG0074000,HORVU.MOREX.r2.1HG0003070,HORVU.MOREX.r2.1HG0072860,HORVU.MOREX.r2.1HG0003500,HORVU.MOREX.r2.1HG0074020,HORVU.MOREX.r2.1HG0004200,HORVU.MOREX.r2.2HG0082340,HORVU.MOR…	HORVU.MOREX.r2.7HG0535840,HORVU.MOREX.r2.7HG0583410,HORVU.MOREX.r2.5HG0354630,HORVU.MOREX.r2.4HG0324220,HORVU.MOREX.r2.7HG0596460,HORVU.MOREX.r2.1HG0068480,HORVU.MOREX.r2.2HG0082400,HORVU.MOREX.r2.7HG0617930,HORVU.MOREX.r2.1HG0073880,HORVU.MOREX.r2.7HG0574400,HORVU.MOREX.r2.7HG0562980,HORVU.MOREX.r2.1HG0073890,HORVU.MOREX.r2.6HG0467930,HORVU.MOREX.r2.5HG0399280,HORVU.MOREX.r2.5HG0389190,HORVU.MOR…	HORVU.MOREX.r2.4HG0341200,HORVU.MOREX.r2.5HG0354630,HORVU.MOREX.r2.4HG0324220,HORVU.MOREX.r2.1HG0068480,HORVU.MOREX.r2.2HG0082400,HORVU.MOREX.r2.3HG0265580,HORVU.MOREX.r2.2HG0172230,HORVU.MOREX.r2.2HG0121430,HORVU.MOREX.r2.1HG0073890,HORVU.MOREX.r2.5HG0445720,HORVU.MOREX.r2.2HG0081610,HORVU.MOREX.r2.7HG0600040,HORVU.MOREX.r2.7HG0577820,HORVU.MOREX.r2.3HG0260940,HORVU.MOREX.r2.7HG0545050,HORVU.MOR…	0.000692125	0.402835	0.0014327
101	22	32	0	1	3	HORVU.MOREX.r2.3HG0204200	HORVU.MOREX.r2.7HG0528560,HORVU.MOREX.r2.7HG0527200,HORVU.MOREX.r2.7HG0527260	HORVU.MOREX.r2.7HG0528560,HORVU.MOREX.r2.6HG0490570,HORVU.MOREX.r2.2HG0082260,HORVU.MOREX.r2.7HG0527200,HORVU.MOREX.r2.3HG0194870,HORVU.MOREX.r2.1HG0059320,HORVU.MOREX.r2.3HG0194100,HORVU.MOREX.r2.7HG0527260,HORVU.MOREX.r2.2HG0180090,HORVU.MOREX.r2.4HG0295090,HORVU.MOREX.r2.2HG0180110,HORVU.MOREX.r2.2HG0146220,HORVU.MOREX.r2.3HG0186430,HORVU.MOREX.r2.1HG0020910,HORVU.MOREX.r2.UnG0632980	0.000927387	0.166485	0.00190069
102	39	43	0	8	29	HORVU.MOREX.r2.1HG0003750,HORVU.MOREX.r2.6HG0510630,HORVU.MOREX.r2.1HG0003070,HORVU.MOREX.r2.1HG0005040,HORVU.MOREX.r2.6HG0510880,HORVU.MOREX.r2.1HG0003500,HORVU.MOREX.r2.7HG0548840,HORVU.MOREX.r2.1HG0003400	HORVU.MOREX.r2.1HG0046160,HORVU.MOREX.r2.3HG0213510,HORVU.MOREX.r2.7HG0598730,HORVU.MOREX.r2.6HG0522830,HORVU.MOREX.r2.2HG0083020,HORVU.MOREX.r2.6HG0526830,HORVU.MOREX.r2.7HG0590870,HORVU.MOREX.r2.4HG0290170,HORVU.MOREX.r2.7HG0548780,HORVU.MOREX.r2.5HG0363890,HORVU.MOREX.r2.4HG0282610,HORVU.MOREX.r2.5HG0401450,HORVU.MOREX.r2.7HG0579340,HORVU.MOREX.r2.6HG0510930,HORVU.MOREX.r2.6HG0510810,HORVU.MOR…	HORVU.MOREX.r2.4HG0291410,HORVU.MOREX.r2.1HG0046160,HORVU.MOREX.r2.3HG0213510,HORVU.MOREX.r2.7HG0598730,HORVU.MOREX.r2.7HG0544820,HORVU.MOREX.r2.3HG0207350,HORVU.MOREX.r2.2HG0083020,HORVU.MOREX.r2.6HG0526830,HORVU.MOREX.r2.7HG0590870,HORVU.MOREX.r2.4HG0290170,HORVU.MOREX.r2.7HG0548780,HORVU.MOREX.r2.5HG0363890,HORVU.MOREX.r2.4HG0282610,HORVU.MOREX.r2.5HG0401450,HORVU.MOREX.r2.7HG0579340,HORVU.MOR…	0.00120856	3.07999	0.0024369
103	48	57	0	30	12	HORVU.MOREX.r2.1HG0066030,HORVU.MOREX.r2.1HG0065920,HORVU.MOREX.r2.2HG0106820,HORVU.MOREX.r2.1HG0065680,HORVU.MOREX.r2.4HG0291260,HORVU.MOREX.r2.4HG0337620,HORVU.MOREX.r2.1HG0051240,HORVU.MOREX.r2.1HG0001710,HORVU.MOREX.r2.1HG0002560,HORVU.MOREX.r2.1HG0065490,HORVU.MOREX.r2.1HG0003750,HORVU.MOREX.r2.1HG0003500,HORVU.MOREX.r2.1HG0065550,HORVU.MOREX.r2.1HG0064450,HORVU.MOREX.r2.1HG0003400,HORVU.MOR…	HORVU.MOREX.r2.7HG0561660,HORVU.MOREX.r2.4HG0281210,HORVU.MOREX.r2.1HG0051000,HORVU.MOREX.r2.4HG0317840,HORVU.MOREX.r2.4HG0316020,HORVU.MOREX.r2.6HG0460800,HORVU.MOREX.r2.7HG0568840,HORVU.MOREX.r2.1HG0059290,HORVU.MOREX.r2.1HG0064910,HORVU.MOREX.r2.2HG0082650,HORVU.MOREX.r2.4HG0304230,HORVU.MOREX.r2.3HG0252710	HORVU.MOREX.r2.6HG0521380,HORVU.MOREX.r2.3HG0250080,HORVU.MOREX.r2.5HG0400420,HORVU.MOREX.r2.3HG0213550,HORVU.MOREX.r2.3HG0212880,HORVU.MOREX.r2.1HG0019520,HORVU.MOREX.r2.1HG0064910,HORVU.MOREX.r2.3HG0260450,HORVU.MOREX.r2.3HG0227930,HORVU.MOREX.r2.6HG0514790,HORVU.MOREX.r2.5HG0395310,HORVU.MOREX.r2.4HG0281210,HORVU.MOREX.r2.6HG0460800,HORVU.MOREX.r2.4HG0291240,HORVU.MOREX.r2.2HG0137960,HORVU.MOR…	0.00121256	0.350943	0.0024369
104	36	60	0	34	8	HORVU.MOREX.r2.6HG0494310,HORVU.MOREX.r2.6HG0494580,HORVU.MOREX.r2.5HG0412560,HORVU.MOREX.r2.4HG0291260,HORVU.MOREX.r2.6HG0495400,HORVU.MOREX.r2.5HG0412940,HORVU.MOREX.r2.1HG0078200,HORVU.MOREX.r2.1HG0078540,HORVU.MOREX.r2.6HG0495440,HORVU.MOREX.r2.1HG0001710,HORVU.MOREX.r2.1HG0002560,HORVU.MOREX.r2.1HG0003750,HORVU.MOREX.r2.6HG0494280,HORVU.MOREX.r2.1HG0003500,HORVU.MOREX.r2.6HG0495140,HORVU.MOR…	HORVU.MOREX.r2.6HG0488890,HORVU.MOREX.r2.2HG0144480,HORVU.MOREX.r2.7HG0553530,HORVU.MOREX.r2.5HG0387660,HORVU.MOREX.r2.7HG0601460,HORVU.MOREX.r2.5HG0412550,HORVU.MOREX.r2.4HG0342540,HORVU.MOREX.r2.6HG0490130	HORVU.MOREX.r2.3HG0221890,HORVU.MOREX.r2.2HG0148770,HORVU.MOREX.r2.7HG0550540,HORVU.MOREX.r2.2HG0144480,HORVU.MOREX.r2.3HG0236180,HORVU.MOREX.r2.1HG0025600,HORVU.MOREX.r2.7HG0570080,HORVU.MOREX.r2.6HG0490130,HORVU.MOREX.r2.7HG0589470,HORVU.MOREX.r2.4HG0319220,HORVU.MOREX.r2.4HG0281530,HORVU.MOREX.r2.1HG0078260,HORVU.MOREX.r2.7HG0601460,HORVU.MOREX.r2.4HG0281540,HORVU.MOREX.r2.4HG0342540,HORVU.MOR…	0.00135461	0.301035	0.0026962
105	50	85	0	33	13	HORVU.MOREX.r2.5HG0424830,HORVU.MOREX.r2.5HG0425570,HORVU.MOREX.r2.5HG0423680,HORVU.MOREX.r2.4HG0291260,HORVU.MOREX.r2.5HG0388740,HORVU.MOREX.r2.3HG0274770,HORVU.MOREX.r2.5HG0424260,HORVU.MOREX.r2.3HG0209440,HORVU.MOREX.r2.5HG0423510,HORVU.MOREX.r2.5HG0424740,HORVU.MOREX.r2.5HG0388620,HORVU.MOREX.r2.1HG0003750,HORVU.MOREX.r2.5HG0424020,HORVU.MOREX.r2.5HG0388420,HORVU.MOREX.r2.5HG0387650,HORVU.MOR…	HORVU.MOREX.r2.2HG0107740,HORVU.MOREX.r2.6HG0522010,HORVU.MOREX.r2.7HG0595210,HORVU.MOREX.r2.3HG0274880,HORVU.MOREX.r2.7HG0546630,HORVU.MOREX.r2.5HG0424790,HORVU.MOREX.r2.2HG0152140,HORVU.MOREX.r2.7HG0623210,HORVU.MOREX.r2.3HG0196280,HORVU.MOREX.r2.1HG0050410,HORVU.MOREX.r2.1HG0069900,HORVU.MOREX.r2.5HG0419570,HORVU.MOREX.r2.3HG0220940	HORVU.MOREX.r2.5HG0355510,HORVU.MOREX.r2.1HG0004870,HORVU.MOREX.r2.3HG0270140,HORVU.MOREX.r2.6HG0458630,HORVU.MOREX.r2.2HG0100310,HORVU.MOREX.r2.4HG0343070,HORVU.MOREX.r2.3HG0274920,HORVU.MOREX.r2.6HG0482280,HORVU.MOREX.r2.6HG0522010,HORVU.MOREX.r2.7HG0595210,HORVU.MOREX.r2.4HG0319000,HORVU.MOREX.r2.2HG0107740,HORVU.MOREX.r2.5HG0421580,HORVU.MOREX.r2.6HG0485920,HORVU.MOREX.r2.1HG0050410,HORVU.MOR…	0.001551	0.369917	0.00305768
106	21	58	0	4	3	HORVU.MOREX.r2.1HG0003070,HORVU.MOREX.r2.1HG0001030,HORVU.MOREX.r2.1HG0003500,HORVU.MOREX.r2.1HG0003400	HORVU.MOREX.r2.2HG0148350,HORVU.MOREX.r2.2HG0091570,HORVU.MOREX.r2.4HG0320470	HORVU.MOREX.r2.4HG0290140,HORVU.MOREX.r2.4HG0284050,HORVU.MOREX.r2.1HG0059730,HORVU.MOREX.r2.2HG0179280,HORVU.MOREX.r2.3HG0239900,HORVU.MOREX.r2.2HG0139050,HORVU.MOREX.r2.2HG0091570,HORVU.MOREX.r2.6HG0492290,HORVU.MOREX.r2.2HG0148350,HORVU.MOREX.r2.1HG0067440,HORVU.MOREX.r2.4HG0320470,HORVU.MOREX.r2.1HG0032090,HORVU.MOREX.r2.5HG0400090	0.00159945	0.175769	0.00309427
107	21	50	0	7	3	HORVU.MOREX.r2.4HG0291260,HORVU.MOREX.r2.1HG0002560,HORVU.MOREX.r2.1HG0002570,HORVU.MOREX.r2.1HG0001030,HORVU.MOREX.r2.1HG0001750,HORVU.MOREX.r2.1HG0002180,HORVU.MOREX.r2.1HG0001710	HORVU.MOREX.r2.2HG0160350,HORVU.MOREX.r2.7HG0582190,HORVU.MOREX.r2.5HG0410460	HORVU.MOREX.r2.7HG0568830,HORVU.MOREX.r2.5HG0410460,HORVU.MOREX.r2.6HG0511400,HORVU.MOREX.r2.5HG0432040,HORVU.MOREX.r2.4HG0288330,HORVU.MOREX.r2.2HG0160350,HORVU.MOREX.r2.7HG0582190,HORVU.MOREX.r2.7HG0532800,HORVU.MOREX.r2.3HG0228740,HORVU.MOREX.r2.5HG0356800,HORVU.MOREX.r2.2HG0110990,HORVU.MOREX.r2.1HG0043070,HORVU.MOREX.r2.6HG0449050,HORVU.MOREX.r2.1HG0060790	0.00159945	0.175769	0.00309427
108	27	200	0	6	5	HORVU.MOREX.r2.1HG0003750,HORVU.MOREX.r2.1HG0001030,HORVU.MOREX.r2.1HG0003070,HORVU.MOREX.r2.1HG0003500,HORVU.MOREX.r2.1HG0003400,HORVU.MOREX.r2.1HG0078080	HORVU.MOREX.r2.6HG0491780,HORVU.MOREX.r2.3HG0205450,HORVU.MOREX.r2.1HG0025160,HORVU.MOREX.r2.3HG0256850,HORVU.MOREX.r2.1HG0007880	HORVU.MOREX.r2.7HG0546820,HORVU.MOREX.r2.1HG0025160,HORVU.MOREX.r2.5HG0409930,HORVU.MOREX.r2.6HG0449520,HORVU.MOREX.r2.6HG0491780,HORVU.MOREX.r2.3HG0205450,HORVU.MOREX.r2.5HG0355760,HORVU.MOREX.r2.6HG0471860,HORVU.MOREX.r2.5HG0414970,HORVU.MOREX.r2.6HG0521400,HORVU.MOREX.r2.1HG0007880,HORVU.MOREX.r2.3HG0232370,HORVU.MOREX.r2.3HG0256850,HORVU.MOREX.r2.3HG0191170,HORVU.MOREX.r2.6HG0521560,HORVU.MOR…	0.00165933	0.239595	0.00318038
109	67	57	0	64	20	HORVU.MOREX.r2.5HG0384030,HORVU.MOREX.r2.4HG0291260,HORVU.MOREX.r2.1HG0002560,HORVU.MOREX.r2.5HG0384050,HORVU.MOREX.r2.7HG0557470,HORVU.MOREX.r2.5HG0438930,HORVU.MOREX.r2.4HG0337620,HORVU.MOREX.r2.5HG0438470,HORVU.MOREX.r2.5HG0374410,HORVU.MOREX.r2.5HG0366280,HORVU.MOREX.r2.2HG0082340,HORVU.MOREX.r2.5HG0375540,HORVU.MOREX.r2.5HG0381870,HORVU.MOREX.r2.5HG0381090,HORVU.MOREX.r2.5HG0437790,HORVU.MOR…	HORVU.MOREX.r2.6HG0516470,HORVU.MOREX.r2.4HG0331780,HORVU.MOREX.r2.3HG0236810,HORVU.MOREX.r2.5HG0377440,HORVU.MOREX.r2.4HG0343670,HORVU.MOREX.r2.2HG0147880,HORVU.MOREX.r2.5HG0436910,HORVU.MOREX.r2.7HG0537070,HORVU.MOREX.r2.2HG0082400,HORVU.MOREX.r2.5HG0393300,HORVU.MOREX.r2.5HG0435810,HORVU.MOREX.r2.1HG0073890,HORVU.MOREX.r2.2HG0147700,HORVU.MOREX.r2.5HG0432550,HORVU.MOREX.r2.5HG0368550,HORVU.MOR…	HORVU.MOREX.r2.3HG0236810,HORVU.MOREX.r2.3HG0191400,HORVU.MOREX.r2.4HG0321590,HORVU.MOREX.r2.2HG0147880,HORVU.MOREX.r2.3HG0236320,HORVU.MOREX.r2.7HG0537070,HORVU.MOREX.r2.2HG0082400,HORVU.MOREX.r2.2HG0121430,HORVU.MOREX.r2.7HG0557540,HORVU.MOREX.r2.5HG0368550,HORVU.MOREX.r2.5HG0432550,HORVU.MOREX.r2.2HG0147700,HORVU.MOREX.r2.1HG0019270,HORVU.MOREX.r2.1HG0051220,HORVU.MOREX.r2.1HG0077230,HORVU.MOR…	0.00204989	0.447783	0.00389291
110	49	152	0	19	13	HORVU.MOREX.r2.1HG0066030,HORVU.MOREX.r2.1HG0065920,HORVU.MOREX.r2.2HG0106820,HORVU.MOREX.r2.1HG0065490,HORVU.MOREX.r2.1HG0065680,HORVU.MOREX.r2.1HG0003750,HORVU.MOREX.r2.1HG0065550,HORVU.MOREX.r2.1HG0064940,HORVU.MOREX.r2.3HG0203410,HORVU.MOREX.r2.1HG0064460,HORVU.MOREX.r2.1HG0078080,HORVU.MOREX.r2.1HG0067900,HORVU.MOREX.r2.1HG0064120,HORVU.MOREX.r2.1HG0065460,HORVU.MOREX.r2.1HG0064450,HORVU.MOR…	HORVU.MOREX.r2.3HG0208130,HORVU.MOREX.r2.1HG0066410,HORVU.MOREX.r2.1HG0067920,HORVU.MOREX.r2.3HG0225090,HORVU.MOREX.r2.3HG0230660,HORVU.MOREX.r2.1HG0064300,HORVU.MOREX.r2.3HG0204560,HORVU.MOREX.r2.1HG0067910,HORVU.MOREX.r2.2HG0102110,HORVU.MOREX.r2.1HG0066310,HORVU.MOREX.r2.1HG0064910,HORVU.MOREX.r2.2HG0104830,HORVU.MOREX.r2.6HG0488480	HORVU.MOREX.r2.2HG0093310,HORVU.MOREX.r2.4HG0326110,HORVU.MOREX.r2.3HG0225090,HORVU.MOREX.r2.3HG0230660,HORVU.MOREX.r2.3HG0204560,HORVU.MOREX.r2.7HG0586600,HORVU.MOREX.r2.1HG0066310,HORVU.MOREX.r2.2HG0085310,HORVU.MOREX.r2.3HG0236690,HORVU.MOREX.r2.2HG0133690,HORVU.MOREX.r2.1HG0067920,HORVU.MOREX.r2.1HG0044600,HORVU.MOREX.r2.1HG0064300,HORVU.MOREX.r2.2HG0102110,HORVU.MOREX.r2.2HG0104830,HORVU.MOR…	0.0022955	0.380268	0.00431971
111	23	34	0	11	4	HORVU.MOREX.r2.3HG0270250,HORVU.MOREX.r2.3HG0271180,HORVU.MOREX.r2.1HG0003070,HORVU.MOREX.r2.5HG0349350,HORVU.MOREX.r2.1HG0003500,HORVU.MOREX.r2.3HG0270990,HORVU.MOREX.r2.1HG0004200,HORVU.MOREX.r2.3HG0269970,HORVU.MOREX.r2.3HG0270590,HORVU.MOREX.r2.1HG0003400,HORVU.MOREX.r2.3HG0271590	HORVU.MOREX.r2.4HG0282740,HORVU.MOREX.r2.5HG0349330,HORVU.MOREX.r2.3HG0271620,HORVU.MOREX.r2.1HG0070800	HORVU.MOREX.r2.2HG0168940,HORVU.MOREX.r2.7HG0569990,HORVU.MOREX.r2.4HG0342270,HORVU.MOREX.r2.6HG0498140,HORVU.MOREX.r2.6HG0521210,HORVU.MOREX.r2.2HG0163220,HORVU.MOREX.r2.5HG0412520,HORVU.MOREX.r2.1HG0062330,HORVU.MOREX.r2.6HG0501730,HORVU.MOREX.r2.3HG0275030,HORVU.MOREX.r2.6HG0521260,HORVU.MOREX.r2.5HG0349330,HORVU.MOREX.r2.6HG0524510,HORVU.MOREX.r2.2HG0163210,HORVU.MOREX.r2.1HG0040670,HORVU.MOR…	0.00279239	0.222026	0.00520744
112	51	85	0	69	14	HORVU.MOREX.r2.1HG0001750,HORVU.MOREX.r2.5HG0418880,HORVU.MOREX.r2.4HG0326250,HORVU.MOREX.r2.1HG0058540,HORVU.MOREX.r2.6HG0455770,HORVU.MOREX.r2.6HG0455430,HORVU.MOREX.r2.5HG0417610,HORVU.MOREX.r2.1HG0060260,HORVU.MOREX.r2.4HG0291260,HORVU.MOREX.r2.7HG0602630,HORVU.MOREX.r2.7HG0602710,HORVU.MOREX.r2.6HG0501240,HORVU.MOREX.r2.1HG0018750,HORVU.MOREX.r2.1HG0059020,HORVU.MOREX.r2.5HG0411900,HORVU.MOR…	HORVU.MOREX.r2.3HG0247750,HORVU.MOREX.r2.4HG0280520,HORVU.MOREX.r2.5HG0414770,HORVU.MOREX.r2.5HG0412650,HORVU.MOREX.r2.2HG0177350,HORVU.MOREX.r2.5HG0420070,HORVU.MOREX.r2.7HG0602590,HORVU.MOREX.r2.7HG0601680,HORVU.MOREX.r2.7HG0602390,HORVU.MOREX.r2.5HG0408520,HORVU.MOREX.r2.4HG0283000,HORVU.MOREX.r2.7HG0598220,HORVU.MOREX.r2.5HG0421440,HORVU.MOREX.r2.3HG0244050	HORVU.MOREX.r2.4HG0280520,HORVU.MOREX.r2.6HG0498140,HORVU.MOREX.r2.2HG0113680,HORVU.MOREX.r2.3HG0258410,HORVU.MOREX.r2.4HG0283000,HORVU.MOREX.r2.2HG0155740,HORVU.MOREX.r2.7HG0598220,HORVU.MOREX.r2.6HG0499840,HORVU.MOREX.r2.5HG0414770,HORVU.MOREX.r2.6HG0503490,HORVU.MOREX.r2.5HG0420070,HORVU.MOREX.r2.7HG0551720,HORVU.MOREX.r2.3HG0269880,HORVU.MOREX.r2.7HG0601680,HORVU.MOREX.r2.7HG0602390,HORVU.MOR…	0.00284405	0.398456	0.00525641
113	43	164	0	20	11	HORVU.MOREX.r2.3HG0240080,HORVU.MOREX.r2.2HG0139120,HORVU.MOREX.r2.5HG0438720,HORVU.MOREX.r2.5HG0439140,HORVU.MOREX.r2.7HG0562310,HORVU.MOREX.r2.5HG0439150,HORVU.MOREX.r2.4HG0341020,HORVU.MOREX.r2.1HG0003070,HORVU.MOREX.r2.5HG0438470,HORVU.MOREX.r2.5HG0439050,HORVU.MOREX.r2.7HG0600720,HORVU.MOREX.r2.5HG0439240,HORVU.MOREX.r2.1HG0003500,HORVU.MOREX.r2.5HG0438250,HORVU.MOREX.r2.5HG0438930,HORVU.MOR…	HORVU.MOREX.r2.5HG0424600,HORVU.MOREX.r2.7HG0565320,HORVU.MOREX.r2.7HG0603920,HORVU.MOREX.r2.5HG0438710,HORVU.MOREX.r2.7HG0602340,HORVU.MOREX.r2.5HG0439370,HORVU.MOREX.r2.5HG0438750,HORVU.MOREX.r2.7HG0593100,HORVU.MOREX.r2.5HG0423360,HORVU.MOREX.r2.5HG0435810,HORVU.MOREX.r2.7HG0563600	HORVU.MOREX.r2.6HG0496420,HORVU.MOREX.r2.7HG0565320,HORVU.MOREX.r2.7HG0603920,HORVU.MOREX.r2.5HG0438710,HORVU.MOREX.r2.2HG0180700,HORVU.MOREX.r2.7HG0602340,HORVU.MOREX.r2.2HG0180070,HORVU.MOREX.r2.2HG0152700,HORVU.MOREX.r2.5HG0439370,HORVU.MOREX.r2.5HG0435810,HORVU.MOREX.r2.7HG0593100,HORVU.MOREX.r2.4HG0342310,HORVU.MOREX.r2.2HG0180080,HORVU.MOREX.r2.7HG0527690,HORVU.MOREX.r2.7HG0549320,HORVU.MOR…	0.00318991	0.362123	0.00584346
114	40	199	0	9	10	HORVU.MOREX.r2.6HG0505240,HORVU.MOREX.r2.1HG0003750,HORVU.MOREX.r2.1HG0003070,HORVU.MOREX.r2.6HG0505150,HORVU.MOREX.r2.1HG0003500,HORVU.MOREX.r2.7HG0545540,HORVU.MOREX.r2.6HG0504200,HORVU.MOREX.r2.1HG0003400,HORVU.MOREX.r2.6HG0504900	HORVU.MOREX.r2.6HG0503990,HORVU.MOREX.r2.3HG0215440,HORVU.MOREX.r2.7HG0537910,HORVU.MOREX.r2.7HG0554840,HORVU.MOREX.r2.6HG0510020,HORVU.MOREX.r2.6HG0505220,HORVU.MOREX.r2.6HG0504810,HORVU.MOREX.r2.6HG0505500,HORVU.MOREX.r2.7HG0561100,HORVU.MOREX.r2.5HG0429630	HORVU.MOREX.r2.7HG0529160,HORVU.MOREX.r2.5HG0363830,HORVU.MOREX.r2.7HG0554840,HORVU.MOREX.r2.6HG0510020,HORVU.MOREX.r2.3HG0267130,HORVU.MOREX.r2.6HG0503990,HORVU.MOREX.r2.6HG0492160,HORVU.MOREX.r2.5HG0429310,HORVU.MOREX.r2.6HG0505500,HORVU.MOREX.r2.7HG0529420,HORVU.MOREX.r2.5HG0422070,HORVU.MOREX.r2.3HG0215440,HORVU.MOREX.r2.5HG0429320,HORVU.MOREX.r2.3HG0267140,HORVU.MOREX.r2.4HG0347420,HORVU.MOR…	0.00375261	0.351215	0.00681394
115	45	187	0	12	12	HORVU.MOREX.r2.3HG0258670,HORVU.MOREX.r2.2HG0098650,HORVU.MOREX.r2.2HG0098990,HORVU.MOREX.r2.2HG0099480,HORVU.MOREX.r2.1HG0003070,HORVU.MOREX.r2.2HG0099640,HORVU.MOREX.r2.7HG0615500,HORVU.MOREX.r2.1HG0003500,HORVU.MOREX.r2.1HG0003750,HORVU.MOREX.r2.3HG0258430,HORVU.MOREX.r2.1HG0003400,HORVU.MOREX.r2.2HG0099970	HORVU.MOREX.r2.1HG0018010,HORVU.MOREX.r2.3HG0258190,HORVU.MOREX.r2.2HG0099550,HORVU.MOREX.r2.2HG0100160,HORVU.MOREX.r2.2HG0099010,HORVU.MOREX.r2.7HG0622620,HORVU.MOREX.r2.2HG0109180,HORVU.MOREX.r2.4HG0348890,HORVU.MOREX.r2.7HG0581610,HORVU.MOREX.r2.2HG0101680,HORVU.MOREX.r2.3HG0190470,HORVU.MOREX.r2.5HG0387260	HORVU.MOREX.r2.3HG0197100,HORVU.MOREX.r2.7HG0611040,HORVU.MOREX.r2.1HG0047420,HORVU.MOREX.r2.2HG0123910,HORVU.MOREX.r2.4HG0329770,HORVU.MOREX.r2.3HG0258190,HORVU.MOREX.r2.7HG0561670,HORVU.MOREX.r2.2HG0109180,HORVU.MOREX.r2.5HG0414960,HORVU.MOREX.r2.7HG0581610,HORVU.MOREX.r2.2HG0101680,HORVU.MOREX.r2.3HG0190470,HORVU.MOREX.r2.6HG0456870,HORVU.MOREX.r2.5HG0431340,HORVU.MOREX.r2.1HG0018010,HORVU.MOR…	0.00400476	0.383076	0.0071432
116	90	149	0	44	30	HORVU.MOREX.r2.3HG0205560,HORVU.MOREX.r2.7HG0615630,HORVU.MOREX.r2.3HG0205970,HORVU.MOREX.r2.7HG0554980,HORVU.MOREX.r2.4HG0291260,HORVU.MOREX.r2.7HG0602630,HORVU.MOREX.r2.7HG0602710,HORVU.MOREX.r2.7HG0617840,HORVU.MOREX.r2.1HG0001750,HORVU.MOREX.r2.7HG0617000,HORVU.MOREX.r2.1HG0078200,HORVU.MOREX.r2.1HG0078540,HORVU.MOREX.r2.7HG0617100,HORVU.MOREX.r2.1HG0078080,HORVU.MOREX.r2.7HG0561540,HORVU.MOR…	HORVU.MOREX.r2.5HG0355280,HORVU.MOREX.r2.2HG0152440,HORVU.MOREX.r2.4HG0347650,HORVU.MOREX.r2.6HG0473420,HORVU.MOREX.r2.2HG0142920,HORVU.MOREX.r2.2HG0158430,HORVU.MOREX.r2.7HG0578400,HORVU.MOREX.r2.5HG0390060,HORVU.MOREX.r2.3HG0206150,HORVU.MOREX.r2.7HG0589460,HORVU.MOREX.r2.2HG0096470,HORVU.MOREX.r2.2HG0166800,HORVU.MOREX.r2.4HG0328640,HORVU.MOREX.r2.4HG0291220,HORVU.MOREX.r2.3HG0203420,HORVU.MOR…	HORVU.MOREX.r2.5HG0355280,HORVU.MOREX.r2.4HG0289380,HORVU.MOREX.r2.1HG0069450,HORVU.MOREX.r2.2HG0159290,HORVU.MOREX.r2.2HG0152440,HORVU.MOREX.r2.4HG0347650,HORVU.MOREX.r2.3HG0216340,HORVU.MOREX.r2.6HG0502610,HORVU.MOREX.r2.UnG0625130,HORVU.MOREX.r2.6HG0473420,HORVU.MOREX.r2.2HG0142920,HORVU.MOREX.r2.2HG0158430,HORVU.MOREX.r2.2HG0127290,HORVU.MOREX.r2.4HG0326890,HORVU.MOREX.r2.7HG0578400,HORVU.MOR…	0.00402993	0.525884	0.0071432
117	28	43	0	6	6	HORVU.MOREX.r2.1HG0014550,HORVU.MOREX.r2.1HG0014200,HORVU.MOREX.r2.1HG0003750,HORVU.MOREX.r2.6HG0464080,HORVU.MOREX.r2.1HG0005040,HORVU.MOREX.r2.6HG0465250	HORVU.MOREX.r2.1HG0014600,HORVU.MOREX.r2.1HG0004900,HORVU.MOREX.r2.6HG0463980,HORVU.MOREX.r2.7HG0562150,HORVU.MOREX.r2.1HG0011850,HORVU.MOREX.r2.1HG0014080	HORVU.MOREX.r2.7HG0600740,HORVU.MOREX.r2.1HG0078410,HORVU.MOREX.r2.1HG0004900,HORVU.MOREX.r2.6HG0526190,HORVU.MOREX.r2.2HG0086880,HORVU.MOREX.r2.3HG0271840,HORVU.MOREX.r2.7HG0602690,HORVU.MOREX.r2.1HG0014080,HORVU.MOREX.r2.6HG0463980,HORVU.MOREX.r2.1HG0014600,HORVU.MOREX.r2.1HG0011850,HORVU.MOREX.r2.7HG0615990,HORVU.MOREX.r2.7HG0585940,HORVU.MOREX.r2.7HG0562150,HORVU.MOREX.r2.3HG0208850,HORVU.MOR…	0.00403746	0.287574	0.0071432
118	25	43	0	5	5	HORVU.MOREX.r2.1HG0003750,HORVU.MOREX.r2.7HG0598640,HORVU.MOREX.r2.7HG0598410,HORVU.MOREX.r2.7HG0598750,HORVU.MOREX.r2.2HG0154580	HORVU.MOREX.r2.7HG0559660,HORVU.MOREX.r2.7HG0599030,HORVU.MOREX.r2.2HG0154620,HORVU.MOREX.r2.3HG0255750,HORVU.MOREX.r2.2HG0160740	HORVU.MOREX.r2.7HG0547980,HORVU.MOREX.r2.2HG0154620,HORVU.MOREX.r2.6HG0469430,HORVU.MOREX.r2.2HG0171320,HORVU.MOREX.r2.2HG0160740,HORVU.MOREX.r2.7HG0612010,HORVU.MOREX.r2.4HG0305800,HORVU.MOREX.r2.7HG0599030,HORVU.MOREX.r2.2HG0082480,HORVU.MOREX.r2.7HG0559660,HORVU.MOREX.r2.3HG0255750,HORVU.MOREX.r2.5HG0367100,HORVU.MOREX.r2.2HG0134470,HORVU.MOREX.r2.4HG0323370	0.00438188	0.263659	0.00768686
119	47	209	0	29	13	HORVU.MOREX.r2.7HG0550400,HORVU.MOREX.r2.6HG0473330,HORVU.MOREX.r2.4HG0330020,HORVU.MOREX.r2.2HG0151230,HORVU.MOREX.r2.4HG0334360,HORVU.MOREX.r2.7HG0548380,HORVU.MOREX.r2.7HG0546180,HORVU.MOREX.r2.2HG0138140,HORVU.MOREX.r2.7HG0540280,HORVU.MOREX.r2.7HG0550010,HORVU.MOREX.r2.7HG0543000,HORVU.MOREX.r2.1HG0018760,HORVU.MOREX.r2.1HG0003750,HORVU.MOREX.r2.6HG0471520,HORVU.MOREX.r2.7HG0549760,HORVU.MOR…	HORVU.MOREX.r2.7HG0601850,HORVU.MOREX.r2.7HG0601280,HORVU.MOREX.r2.7HG0600860,HORVU.MOREX.r2.4HG0341990,HORVU.MOREX.r2.7HG0549980,HORVU.MOREX.r2.7HG0554610,HORVU.MOREX.r2.7HG0600890,HORVU.MOREX.r2.4HG0328620,HORVU.MOREX.r2.7HG0576290,HORVU.MOREX.r2.7HG0550700,HORVU.MOREX.r2.6HG0519290,HORVU.MOREX.r2.7HG0550280,HORVU.MOREX.r2.1HG0070170	HORVU.MOREX.r2.7HG0538250,HORVU.MOREX.r2.7HG0563720,HORVU.MOREX.r2.7HG0601850,HORVU.MOREX.r2.7HG0601280,HORVU.MOREX.r2.7HG0600860,HORVU.MOREX.r2.4HG0341990,HORVU.MOREX.r2.7HG0549980,HORVU.MOREX.r2.7HG0554610,HORVU.MOREX.r2.1HG0006240,HORVU.MOREX.r2.6HG0505230,HORVU.MOREX.r2.7HG0589100,HORVU.MOREX.r2.2HG0108690,HORVU.MOREX.r2.7HG0600890,HORVU.MOREX.r2.4HG0328620,HORVU.MOREX.r2.7HG0576290,HORVU.MOR…	0.00492849	0.402797	0.00850605
120	57	143	0	14	17	HORVU.MOREX.r2.6HG0459120,HORVU.MOREX.r2.2HG0143420,HORVU.MOREX.r2.1HG0076360,HORVU.MOREX.r2.1HG0003750,HORVU.MOREX.r2.1HG0076680,HORVU.MOREX.r2.1HG0003070,HORVU.MOREX.r2.2HG0096990,HORVU.MOREX.r2.1HG0076850,HORVU.MOREX.r2.1HG0003500,HORVU.MOREX.r2.2HG0097010,HORVU.MOREX.r2.6HG0459110,HORVU.MOREX.r2.1HG0076430,HORVU.MOREX.r2.7HG0599310,HORVU.MOREX.r2.1HG0003400	HORVU.MOREX.r2.3HG0192010,HORVU.MOREX.r2.2HG0133410,HORVU.MOREX.r2.1HG0076500,HORVU.MOREX.r2.6HG0522630,HORVU.MOREX.r2.1HG0020140,HORVU.MOREX.r2.4HG0315830,HORVU.MOREX.r2.2HG0088280,HORVU.MOREX.r2.4HG0277550,HORVU.MOREX.r2.6HG0459010,HORVU.MOREX.r2.4HG0341700,HORVU.MOREX.r2.2HG0091430,HORVU.MOREX.r2.7HG0598220,HORVU.MOREX.r2.5HG0446420,HORVU.MOREX.r2.3HG0259640,HORVU.MOREX.r2.5HG0381520,HORVU.MOR…	HORVU.MOREX.r2.1HG0067230,HORVU.MOREX.r2.3HG0259450,HORVU.MOREX.r2.1HG0020140,HORVU.MOREX.r2.6HG0483290,HORVU.MOREX.r2.6HG0459010,HORVU.MOREX.r2.7HG0598220,HORVU.MOREX.r2.3HG0226880,HORVU.MOREX.r2.4HG0346550,HORVU.MOREX.r2.3HG0226490,HORVU.MOREX.r2.3HG0192010,HORVU.MOREX.r2.6HG0522870,HORVU.MOREX.r2.4HG0320350,HORVU.MOREX.r2.6HG0522630,HORVU.MOREX.r2.6HG0517480,HORVU.MOREX.r2.2HG0176030,HORVU.MOR…	0.00493104	0.447566	0.00850605
121	30	43	0	4	7	HORVU.MOREX.r2.1HG0003070,HORVU.MOREX.r2.1HG0003500,HORVU.MOREX.r2.1HG0003400,HORVU.MOREX.r2.1HG0003750	HORVU.MOREX.r2.7HG0544560,HORVU.MOREX.r2.4HG0284370,HORVU.MOREX.r2.2HG0147880,HORVU.MOREX.r2.1HG0052160,HORVU.MOREX.r2.2HG0147700,HORVU.MOREX.r2.1HG0039600,HORVU.MOREX.r2.2HG0082710	HORVU.MOREX.r2.7HG0544560,HORVU.MOREX.r2.4HG0284370,HORVU.MOREX.r2.2HG0147880,HORVU.MOREX.r2.4HG0278420,HORVU.MOREX.r2.7HG0547990,HORVU.MOREX.r2.5HG0432220,HORVU.MOREX.r2.2HG0147700,HORVU.MOREX.r2.4HG0282910,HORVU.MOREX.r2.1HG0039600,HORVU.MOREX.r2.3HG0256400,HORVU.MOREX.r2.5HG0401960,HORVU.MOREX.r2.1HG0052160,HORVU.MOREX.r2.5HG0429550,HORVU.MOREX.r2.4HG0278480,HORVU.MOREX.r2.5HG0360410,HORVU.MOR…	0.00567236	0.32092	0.00970396
122	27	64	0	4	6	HORVU.MOREX.r2.1HG0003070,HORVU.MOREX.r2.1HG0003500,HORVU.MOREX.r2.1HG0003400,HORVU.MOREX.r2.7HG0549330	HORVU.MOREX.r2.2HG0142970,HORVU.MOREX.r2.6HG0486870,HORVU.MOREX.r2.7HG0549470,HORVU.MOREX.r2.3HG0251160,HORVU.MOREX.r2.3HG0240960,HORVU.MOREX.r2.7HG0596060	HORVU.MOREX.r2.5HG0395280,HORVU.MOREX.r2.3HG0240960,HORVU.MOREX.r2.1HG0060180,HORVU.MOREX.r2.6HG0486870,HORVU.MOREX.r2.5HG0399340,HORVU.MOREX.r2.3HG0251160,HORVU.MOREX.r2.4HG0286970,HORVU.MOREX.r2.7HG0596060,HORVU.MOREX.r2.3HG0238220,HORVU.MOREX.r2.2HG0114090,HORVU.MOREX.r2.7HG0552150,HORVU.MOREX.r2.4HG0331160,HORVU.MOREX.r2.6HG0506660,HORVU.MOREX.r2.1HG0052870,HORVU.MOREX.r2.7HG0558910,HORVU.MOR…	0.00636999	0.301328	0.0108081
123	35	58	0	5	9	HORVU.MOREX.r2.1HG0003070,HORVU.MOREX.r2.1HG0001030,HORVU.MOREX.r2.1HG0003500,HORVU.MOREX.r2.1HG0003400,HORVU.MOREX.r2.1HG0003750	HORVU.MOREX.r2.6HG0483020,HORVU.MOREX.r2.4HG0281090,HORVU.MOREX.r2.1HG0015100,HORVU.MOREX.r2.2HG0079570,HORVU.MOREX.r2.1HG0015010,HORVU.MOREX.r2.5HG0404130,HORVU.MOREX.r2.2HG0102880,HORVU.MOREX.r2.7HG0568550,HORVU.MOREX.r2.2HG0096390	HORVU.MOREX.r2.6HG0483020,HORVU.MOREX.r2.1HG0015100,HORVU.MOREX.r2.5HG0412520,HORVU.MOREX.r2.5HG0378980,HORVU.MOREX.r2.7HG0569990,HORVU.MOREX.r2.7HG0550580,HORVU.MOREX.r2.4HG0291940,HORVU.MOREX.r2.3HG0203250,HORVU.MOREX.r2.7HG0568550,HORVU.MOREX.r2.1HG0037530,HORVU.MOREX.r2.5HG0411590,HORVU.MOREX.r2.1HG0062650,HORVU.MOREX.r2.4HG0291020,HORVU.MOREX.r2.2HG0102880,HORVU.MOREX.r2.7HG0601030,HORVU.MOR…	0.00657574	0.364937	0.0110665
124	61	86	0	28	19	HORVU.MOREX.r2.5HG0398040,HORVU.MOREX.r2.5HG0397220,HORVU.MOREX.r2.5HG0398060,HORVU.MOREX.r2.2HG0085190,HORVU.MOREX.r2.1HG0078080,HORVU.MOREX.r2.2HG0085770,HORVU.MOREX.r2.5HG0396840,HORVU.MOREX.r2.1HG0003750,HORVU.MOREX.r2.1HG0001030,HORVU.MOREX.r2.2HG0085320,HORVU.MOREX.r2.5HG0396550,HORVU.MOREX.r2.2HG0084620,HORVU.MOREX.r2.5HG0396910,HORVU.MOREX.r2.5HG0394700,HORVU.MOREX.r2.1HG0003500,HORVU.MOR…	HORVU.MOREX.r2.1HG0040480,HORVU.MOREX.r2.3HG0252790,HORVU.MOREX.r2.5HG0394510,HORVU.MOREX.r2.6HG0491650,HORVU.MOREX.r2.2HG0111260,HORVU.MOREX.r2.4HG0297140,HORVU.MOREX.r2.7HG0622110,HORVU.MOREX.r2.7HG0596370,HORVU.MOREX.r2.1HG0070820,HORVU.MOREX.r2.1HG0000110,HORVU.MOREX.r2.7HG0575160,HORVU.MOREX.r2.2HG0131570,HORVU.MOREX.r2.2HG0096310,HORVU.MOREX.r2.1HG0034150,HORVU.MOREX.r2.7HG0561080,HORVU.MOR…	HORVU.MOREX.r2.1HG0040480,HORVU.MOREX.r2.3HG0252790,HORVU.MOREX.r2.4HG0293380,HORVU.MOREX.r2.7HG0622110,HORVU.MOREX.r2.3HG0251960,HORVU.MOREX.r2.1HG0070820,HORVU.MOREX.r2.1HG0039770,HORVU.MOREX.r2.7HG0534530,HORVU.MOREX.r2.6HG0519490,HORVU.MOREX.r2.7HG0591810,HORVU.MOREX.r2.3HG0261040,HORVU.MOREX.r2.2HG0085820,HORVU.MOREX.r2.6HG0491650,HORVU.MOREX.r2.3HG0232100,HORVU.MOREX.r2.3HG0245120,HORVU.MOR…	0.00669592	0.47641	0.0111779
125	24	54	0	4	5	HORVU.MOREX.r2.1HG0003070,HORVU.MOREX.r2.1HG0003500,HORVU.MOREX.r2.1HG0003400,HORVU.MOREX.r2.1HG0003750	HORVU.MOREX.r2.4HG0342490,HORVU.MOREX.r2.7HG0567850,HORVU.MOREX.r2.1HG0004810,HORVU.MOREX.r2.2HG0128610,HORVU.MOREX.r2.1HG0018930	HORVU.MOREX.r2.7HG0583780,HORVU.MOREX.r2.7HG0567850,HORVU.MOREX.r2.5HG0387370,HORVU.MOREX.r2.4HG0342490,HORVU.MOREX.r2.7HG0612230,HORVU.MOREX.r2.5HG0398650,HORVU.MOREX.r2.1HG0004810,HORVU.MOREX.r2.1HG0018930,HORVU.MOREX.r2.6HG0506560,HORVU.MOREX.r2.2HG0128610,HORVU.MOREX.r2.5HG0442540,HORVU.MOREX.r2.4HG0280220,HORVU.MOREX.r2.4HG0277180,HORVU.MOREX.r2.5HG0349610,HORVU.MOREX.r2.5HG0432990,HORVU.MOR…	0.00704041	0.277591	0.011555
126	24	41	0	3	5	HORVU.MOREX.r2.1HG0003070,HORVU.MOREX.r2.1HG0003500,HORVU.MOREX.r2.1HG0003400	HORVU.MOREX.r2.3HG0248560,HORVU.MOREX.r2.3HG0259040,HORVU.MOREX.r2.5HG0396070,HORVU.MOREX.r2.1HG0019110,HORVU.MOREX.r2.2HG0133160	HORVU.MOREX.r2.6HG0504420,HORVU.MOREX.r2.5HG0396070,HORVU.MOREX.r2.3HG0258130,HORVU.MOREX.r2.3HG0212430,HORVU.MOREX.r2.5HG0378770,HORVU.MOREX.r2.2HG0149030,HORVU.MOREX.r2.3HG0248560,HORVU.MOREX.r2.2HG0080140,HORVU.MOREX.r2.3HG0223640,HORVU.MOREX.r2.5HG0438660,HORVU.MOREX.r2.3HG0250490,HORVU.MOREX.r2.5HG0384570,HORVU.MOREX.r2.3HG0259040,HORVU.MOREX.r2.6HG0510530,HORVU.MOREX.r2.5HG0445470,HORVU.MOR…	0.00704041	0.277591	0.011555
127	51	64	0	28	15	HORVU.MOREX.r2.6HG0464080,HORVU.MOREX.r2.4HG0340600,HORVU.MOREX.r2.4HG0340130,HORVU.MOREX.r2.4HG0288360,HORVU.MOREX.r2.4HG0340560,HORVU.MOREX.r2.7HG0551080,HORVU.MOREX.r2.4HG0295370,HORVU.MOREX.r2.1HG0003750,HORVU.MOREX.r2.4HG0287820,HORVU.MOREX.r2.7HG0554060,HORVU.MOREX.r2.4HG0341690,HORVU.MOREX.r2.1HG0003500,HORVU.MOREX.r2.UnG0630370,HORVU.MOREX.r2.4HG0288290,HORVU.MOREX.r2.1HG0003400,HORVU.MOR…	HORVU.MOREX.r2.4HG0344460,HORVU.MOREX.r2.6HG0461780,HORVU.MOREX.r2.7HG0581610,HORVU.MOREX.r2.2HG0177520,HORVU.MOREX.r2.2HG0153190,HORVU.MOREX.r2.4HG0289350,HORVU.MOREX.r2.6HG0461880,HORVU.MOREX.r2.7HG0554110,HORVU.MOREX.r2.3HG0196610,HORVU.MOREX.r2.4HG0340860,HORVU.MOREX.r2.4HG0337610,HORVU.MOREX.r2.3HG0221240,HORVU.MOREX.r2.4HG0341440,HORVU.MOREX.r2.7HG0582550,HORVU.MOREX.r2.2HG0136390	HORVU.MOREX.r2.5HG0374940,HORVU.MOREX.r2.4HG0344460,HORVU.MOREX.r2.3HG0243530,HORVU.MOREX.r2.3HG0205270,HORVU.MOREX.r2.1HG0044700,HORVU.MOREX.r2.7HG0554110,HORVU.MOREX.r2.4HG0282090,HORVU.MOREX.r2.3HG0221240,HORVU.MOREX.r2.2HG0086340,HORVU.MOREX.r2.4HG0318980,HORVU.MOREX.r2.7HG0558950,HORVU.MOREX.r2.3HG0253280,HORVU.MOREX.r2.3HG0263480,HORVU.MOREX.r2.7HG0595190,HORVU.MOREX.r2.6HG0501530,HORVU.MOR…	0.0071021	0.438955	0.011555
128	46	107	0	10	13	HORVU.MOREX.r2.1HG0001750,HORVU.MOREX.r2.1HG0002560,HORVU.MOREX.r2.1HG0002570,HORVU.MOREX.r2.4HG0291260,HORVU.MOREX.r2.1HG0003070,HORVU.MOREX.r2.1HG0002180,HORVU.MOREX.r2.1HG0003500,HORVU.MOREX.r2.6HG0509850,HORVU.MOREX.r2.1HG0003400,HORVU.MOREX.r2.1HG0001710	HORVU.MOREX.r2.3HG0213080,HORVU.MOREX.r2.5HG0437610,HORVU.MOREX.r2.7HG0537160,HORVU.MOREX.r2.4HG0312490,HORVU.MOREX.r2.3HG0217370,HORVU.MOREX.r2.2HG0150150,HORVU.MOREX.r2.4HG0307030,HORVU.MOREX.r2.7HG0607060,HORVU.MOREX.r2.3HG0271220,HORVU.MOREX.r2.2HG0135340,HORVU.MOREX.r2.7HG0566810,HORVU.MOREX.r2.1HG0041950,HORVU.MOREX.r2.1HG0077870	HORVU.MOREX.r2.4HG0326080,HORVU.MOREX.r2.5HG0437610,HORVU.MOREX.r2.2HG0157120,HORVU.MOREX.r2.7HG0607060,HORVU.MOREX.r2.3HG0271220,HORVU.MOREX.r2.1HG0001650,HORVU.MOREX.r2.2HG0140440,HORVU.MOREX.r2.7HG0532380,HORVU.MOREX.r2.7HG0537160,HORVU.MOREX.r2.6HG0489500,HORVU.MOREX.r2.4HG0307030,HORVU.MOREX.r2.2HG0109660,HORVU.MOREX.r2.3HG0213080,HORVU.MOREX.r2.2HG0135340,HORVU.MOREX.r2.3HG0183110,HORVU.MOR…	0.00714514	0.415086	0.011555
129	43	132	0	25	12	HORVU.MOREX.r2.5HG0433720,HORVU.MOREX.r2.5HG0434780,HORVU.MOREX.r2.5HG0434130,HORVU.MOREX.r2.5HG0434820,HORVU.MOREX.r2.5HG0435040,HORVU.MOREX.r2.1HG0003750,HORVU.MOREX.r2.5HG0434680,HORVU.MOREX.r2.7HG0612250,HORVU.MOREX.r2.5HG0385900,HORVU.MOREX.r2.1HG0003500,HORVU.MOREX.r2.UnG0630370,HORVU.MOREX.r2.5HG0434260,HORVU.MOREX.r2.5HG0434150,HORVU.MOREX.r2.5HG0433840,HORVU.MOREX.r2.5HG0434380,HORVU.MOR…	HORVU.MOREX.r2.4HG0332820,HORVU.MOREX.r2.4HG0337780,HORVU.MOREX.r2.5HG0379180,HORVU.MOREX.r2.7HG0586440,HORVU.MOREX.r2.6HG0479930,HORVU.MOREX.r2.7HG0612440,HORVU.MOREX.r2.2HG0177800,HORVU.MOREX.r2.5HG0438540,HORVU.MOREX.r2.1HG0047070,HORVU.MOREX.r2.5HG0419570,HORVU.MOREX.r2.3HG0212790,HORVU.MOREX.r2.2HG0164770	HORVU.MOREX.r2.1HG0048790,HORVU.MOREX.r2.4HG0321150,HORVU.MOREX.r2.6HG0473310,HORVU.MOREX.r2.5HG0379180,HORVU.MOREX.r2.2HG0177800,HORVU.MOREX.r2.3HG0222180,HORVU.MOREX.r2.1HG0047070,HORVU.MOREX.r2.7HG0551500,HORVU.MOREX.r2.5HG0370850,HORVU.MOREX.r2.4HG0337780,HORVU.MOREX.r2.5HG0395490,HORVU.MOREX.r2.4HG0332820,HORVU.MOREX.r2.4HG0325940,HORVU.MOREX.r2.2HG0111410,HORVU.MOREX.r2.6HG0457650,HORVU.MOR…	0.00857168	0.407953	0.0137546
130	29	31	0	6	7	HORVU.MOREX.r2.3HG0204200,HORVU.MOREX.r2.1HG0003070,HORVU.MOREX.r2.3HG0247470,HORVU.MOREX.r2.1HG0003500,HORVU.MOREX.r2.3HG0248510,HORVU.MOREX.r2.1HG0003400	HORVU.MOREX.r2.2HG0110730,HORVU.MOREX.r2.3HG0215820,HORVU.MOREX.r2.1HG0055660,HORVU.MOREX.r2.4HG0338680,HORVU.MOREX.r2.3HG0247500,HORVU.MOREX.r2.3HG0206170,HORVU.MOREX.r2.2HG0149820	HORVU.MOREX.r2.2HG0110730,HORVU.MOREX.r2.1HG0055660,HORVU.MOREX.r2.3HG0215820,HORVU.MOREX.r2.5HG0389230,HORVU.MOREX.r2.1HG0066640,HORVU.MOREX.r2.3HG0212090,HORVU.MOREX.r2.3HG0256240,HORVU.MOREX.r2.4HG0347150,HORVU.MOREX.r2.1HG0052350,HORVU.MOREX.r2.1HG0069800,HORVU.MOREX.r2.3HG0247500,HORVU.MOREX.r2.3HG0206170,HORVU.MOREX.r2.2HG0149830,HORVU.MOREX.r2.2HG0157530,HORVU.MOREX.r2.5HG0382160,HORVU.MOR…	0.00874502	0.335574	0.0139248
131	26	38	0	59	6	HORVU.MOREX.r2.5HG0418880,HORVU.MOREX.r2.4HG0326250,HORVU.MOREX.r2.1HG0058540,HORVU.MOREX.r2.6HG0455770,HORVU.MOREX.r2.6HG0455430,HORVU.MOREX.r2.5HG0417610,HORVU.MOREX.r2.1HG0060260,HORVU.MOREX.r2.4HG0340600,HORVU.MOREX.r2.4HG0340130,HORVU.MOREX.r2.6HG0501240,HORVU.MOREX.r2.1HG0018750,HORVU.MOREX.r2.1HG0059020,HORVU.MOREX.r2.1HG0058190,HORVU.MOREX.r2.2HG0157590,HORVU.MOREX.r2.1HG0066070,HORVU.MOR…	HORVU.MOREX.r2.5HG0419500,HORVU.MOREX.r2.3HG0209720,HORVU.MOREX.r2.6HG0511230,HORVU.MOREX.r2.4HG0340860,HORVU.MOREX.r2.4HG0340630,HORVU.MOREX.r2.7HG0587930	HORVU.MOREX.r2.6HG0514270,HORVU.MOREX.r2.6HG0501920,HORVU.MOREX.r2.2HG0130210,HORVU.MOREX.r2.1HG0058890,HORVU.MOREX.r2.4HG0338120,HORVU.MOREX.r2.5HG0419500,HORVU.MOREX.r2.3HG0253310,HORVU.MOREX.r2.2HG0172010,HORVU.MOREX.r2.7HG0620900,HORVU.MOREX.r2.6HG0511230,HORVU.MOREX.r2.3HG0209720,HORVU.MOREX.r2.5HG0419540,HORVU.MOREX.r2.4HG0340860,HORVU.MOREX.r2.4HG0340630,HORVU.MOREX.r2.2HG0131040,HORVU.MOR…	0.00996769	0.316457	0.0157505
132	45	35	0	18	13	HORVU.MOREX.r2.5HG0436030,HORVU.MOREX.r2.5HG0435910,HORVU.MOREX.r2.3HG0212490,HORVU.MOREX.r2.5HG0436230,HORVU.MOREX.r2.1HG0001030,HORVU.MOREX.r2.5HG0435890,HORVU.MOREX.r2.1HG0003070,HORVU.MOREX.r2.5HG0435820,HORVU.MOREX.r2.2HG0090790,HORVU.MOREX.r2.5HG0436080,HORVU.MOREX.r2.1HG0003500,HORVU.MOREX.r2.2HG0090620,HORVU.MOREX.r2.4HG0316710,HORVU.MOREX.r2.2HG0090830,HORVU.MOREX.r2.1HG0006400,HORVU.MOR…	HORVU.MOREX.r2.2HG0114780,HORVU.MOREX.r2.7HG0560380,HORVU.MOREX.r2.2HG0090910,HORVU.MOREX.r2.2HG0129950,HORVU.MOREX.r2.7HG0595210,HORVU.MOREX.r2.6HG0456710,HORVU.MOREX.r2.1HG0052330,HORVU.MOREX.r2.1HG0003280,HORVU.MOREX.r2.3HG0196280,HORVU.MOREX.r2.5HG0436340,HORVU.MOREX.r2.2HG0109070,HORVU.MOREX.r2.2HG0175170,HORVU.MOREX.r2.7HG0580400	HORVU.MOREX.r2.7HG0607140,HORVU.MOREX.r2.4HG0278220,HORVU.MOREX.r2.5HG0378980,HORVU.MOREX.r2.7HG0617080,HORVU.MOREX.r2.1HG0061930,HORVU.MOREX.r2.5HG0436340,HORVU.MOREX.r2.4HG0291940,HORVU.MOREX.r2.3HG0245250,HORVU.MOREX.r2.2HG0110630,HORVU.MOREX.r2.2HG0114780,HORVU.MOREX.r2.6HG0482280,HORVU.MOREX.r2.3HG0238220,HORVU.MOREX.r2.1HG0028440,HORVU.MOREX.r2.7HG0582660,HORVU.MOREX.r2.6HG0456710,HORVU.MOR…	0.0102809	0.428143	0.0160174
133	40	111	0	12	11	HORVU.MOREX.r2.5HG0447180,HORVU.MOREX.r2.5HG0388620,HORVU.MOREX.r2.5HG0388970,HORVU.MOREX.r2.1HG0003070,HORVU.MOREX.r2.5HG0388740,HORVU.MOREX.r2.5HG0388420,HORVU.MOREX.r2.5HG0387650,HORVU.MOREX.r2.1HG0003750,HORVU.MOREX.r2.1HG0003500,HORVU.MOREX.r2.3HG0209440,HORVU.MOREX.r2.5HG0387850,HORVU.MOREX.r2.1HG0003400	HORVU.MOREX.r2.5HG0363570,HORVU.MOREX.r2.5HG0388570,HORVU.MOREX.r2.5HG0377220,HORVU.MOREX.r2.7HG0588800,HORVU.MOREX.r2.5HG0387820,HORVU.MOREX.r2.2HG0148660,HORVU.MOREX.r2.2HG0152140,HORVU.MOREX.r2.5HG0409710,HORVU.MOREX.r2.3HG0204480,HORVU.MOREX.r2.3HG0272130,HORVU.MOREX.r2.5HG0389290	HORVU.MOREX.r2.6HG0477020,HORVU.MOREX.r2.5HG0363570,HORVU.MOREX.r2.5HG0372070,HORVU.MOREX.r2.5HG0387820,HORVU.MOREX.r2.5HG0444090,HORVU.MOREX.r2.2HG0140640,HORVU.MOREX.r2.1HG0066720,HORVU.MOREX.r2.3HG0204480,HORVU.MOREX.r2.5HG0377220,HORVU.MOREX.r2.4HG0320400,HORVU.MOREX.r2.7HG0588800,HORVU.MOREX.r2.7HG0569950,HORVU.MOREX.r2.4HG0337230,HORVU.MOREX.r2.7HG0549420,HORVU.MOREX.r2.3HG0272130,HORVU.MOR…	0.0102913	0.399822	0.0160174
134	31	76	0	18	8	HORVU.MOREX.r2.4HG0332490,HORVU.MOREX.r2.7HG0554980,HORVU.MOREX.r2.1HG0073610,HORVU.MOREX.r2.1HG0064120,HORVU.MOREX.r2.2HG0106820,HORVU.MOREX.r2.1HG0064940,HORVU.MOREX.r2.4HG0315870,HORVU.MOREX.r2.1HG0003070,HORVU.MOREX.r2.1HG0075930,HORVU.MOREX.r2.1HG0064460,HORVU.MOREX.r2.4HG0335300,HORVU.MOREX.r2.1HG0003750,HORVU.MOREX.r2.1HG0003500,HORVU.MOREX.r2.1HG0075910,HORVU.MOREX.r2.1HG0073450,HORVU.MOR…	HORVU.MOREX.r2.7HG0554650,HORVU.MOREX.r2.1HG0046680,HORVU.MOREX.r2.3HG0206270,HORVU.MOREX.r2.1HG0064430,HORVU.MOREX.r2.1HG0073510,HORVU.MOREX.r2.4HG0339320,HORVU.MOREX.r2.6HG0523360,HORVU.MOREX.r2.1HG0073500	HORVU.MOREX.r2.6HG0460170,HORVU.MOREX.r2.4HG0332920,HORVU.MOREX.r2.1HG0064430,HORVU.MOREX.r2.5HG0434090,HORVU.MOREX.r2.7HG0597270,HORVU.MOREX.r2.7HG0554650,HORVU.MOREX.r2.7HG0620440,HORVU.MOREX.r2.1HG0046680,HORVU.MOREX.r2.5HG0413910,HORVU.MOREX.r2.4HG0339130,HORVU.MOREX.r2.7HG0620420,HORVU.MOREX.r2.6HG0460210,HORVU.MOREX.r2.6HG0487560,HORVU.MOREX.r2.6HG0523360,HORVU.MOREX.r2.1HG0073500,HORVU.MOR…	0.0114861	0.366842	0.0176121
135	31	62	0	13	8	HORVU.MOREX.r2.1HG0001750,HORVU.MOREX.r2.1HG0002560,HORVU.MOREX.r2.1HG0002570,HORVU.MOREX.r2.4HG0291260,HORVU.MOREX.r2.1HG0003070,HORVU.MOREX.r2.4HG0331610,HORVU.MOREX.r2.7HG0541620,HORVU.MOREX.r2.1HG0002180,HORVU.MOREX.r2.1HG0003500,HORVU.MOREX.r2.UnG0630370,HORVU.MOREX.r2.1HG0004200,HORVU.MOREX.r2.1HG0003400,HORVU.MOREX.r2.1HG0001710	HORVU.MOREX.r2.7HG0541630,HORVU.MOREX.r2.6HG0499630,HORVU.MOREX.r2.1HG0061800,HORVU.MOREX.r2.4HG0318530,HORVU.MOREX.r2.2HG0177350,HORVU.MOREX.r2.6HG0453610,HORVU.MOREX.r2.3HG0200700,HORVU.MOREX.r2.4HG0331770	HORVU.MOREX.r2.1HG0021300,HORVU.MOREX.r2.4HG0327040,HORVU.MOREX.r2.4HG0318530,HORVU.MOREX.r2.1HG0043940,HORVU.MOREX.r2.3HG0200700,HORVU.MOREX.r2.1HG0036000,HORVU.MOREX.r2.7HG0569380,HORVU.MOREX.r2.2HG0140440,HORVU.MOREX.r2.7HG0550270,HORVU.MOREX.r2.6HG0499630,HORVU.MOREX.r2.7HG0597830,HORVU.MOREX.r2.6HG0461770,HORVU.MOREX.r2.6HG0453610,HORVU.MOREX.r2.4HG0307130,HORVU.MOREX.r2.4HG0331770,HORVU.MOR…	0.0114861	0.366842	0.0176121
136	42	63	0	11	12	HORVU.MOREX.r2.4HG0332490,HORVU.MOREX.r2.1HG0073610,HORVU.MOREX.r2.4HG0286680,HORVU.MOREX.r2.4HG0315870,HORVU.MOREX.r2.1HG0003070,HORVU.MOREX.r2.4HG0289920,HORVU.MOREX.r2.1HG0003500,HORVU.MOREX.r2.4HG0335300,HORVU.MOREX.r2.1HG0003750,HORVU.MOREX.r2.1HG0073450,HORVU.MOREX.r2.1HG0003400	HORVU.MOREX.r2.2HG0088830,HORVU.MOREX.r2.4HG0320220,HORVU.MOREX.r2.1HG0016480,HORVU.MOREX.r2.1HG0073230,HORVU.MOREX.r2.1HG0055760,HORVU.MOREX.r2.1HG0037450,HORVU.MOREX.r2.4HG0347350,HORVU.MOREX.r2.3HG0189240,HORVU.MOREX.r2.1HG0050740,HORVU.MOREX.r2.5HG0380200,HORVU.MOREX.r2.1HG0023650,HORVU.MOREX.r2.1HG0027480	HORVU.MOREX.r2.3HG0245860,HORVU.MOREX.r2.1HG0016480,HORVU.MOREX.r2.3HG0204250,HORVU.MOREX.r2.7HG0601130,HORVU.MOREX.r2.2HG0127000,HORVU.MOREX.r2.6HG0507580,HORVU.MOREX.r2.1HG0055760,HORVU.MOREX.r2.2HG0157420,HORVU.MOREX.r2.4HG0347430,HORVU.MOREX.r2.1HG0023650,HORVU.MOREX.r2.1HG0027480,HORVU.MOREX.r2.3HG0258250,HORVU.MOREX.r2.1HG0073230,HORVU.MOREX.r2.3HG0253600,HORVU.MOREX.r2.1HG0037470,HORVU.MOR…	0.012394	0.421635	0.0188644
137	49	58	0	28	15	HORVU.MOREX.r2.5HG0406340,HORVU.MOREX.r2.4HG0291260,HORVU.MOREX.r2.7HG0619040,HORVU.MOREX.r2.1HG0001710,HORVU.MOREX.r2.7HG0619360,HORVU.MOREX.r2.1HG0002560,HORVU.MOREX.r2.1HG0003750,HORVU.MOREX.r2.7HG0554060,HORVU.MOREX.r2.1HG0005040,HORVU.MOREX.r2.1HG0003500,HORVU.MOREX.r2.1HG0004200,HORVU.MOREX.r2.5HG0406790,HORVU.MOREX.r2.1HG0003400,HORVU.MOREX.r2.7HG0553840,HORVU.MOREX.r2.6HG0463100,HORVU.MOR…	HORVU.MOREX.r2.7HG0619280,HORVU.MOREX.r2.7HG0554080,HORVU.MOREX.r2.5HG0391760,HORVU.MOREX.r2.1HG0022960,HORVU.MOREX.r2.5HG0406220,HORVU.MOREX.r2.6HG0452060,HORVU.MOREX.r2.2HG0096470,HORVU.MOREX.r2.5HG0415180,HORVU.MOREX.r2.6HG0459050,HORVU.MOREX.r2.5HG0421310,HORVU.MOREX.r2.3HG0246000,HORVU.MOREX.r2.6HG0502270,HORVU.MOREX.r2.4HG0336500,HORVU.MOREX.r2.7HG0619400,HORVU.MOREX.r2.3HG0246030	HORVU.MOREX.r2.7HG0554080,HORVU.MOREX.r2.7HG0597230,HORVU.MOREX.r2.5HG0406220,HORVU.MOREX.r2.1HG0043460,HORVU.MOREX.r2.1HG0022310,HORVU.MOREX.r2.4HG0332480,HORVU.MOREX.r2.3HG0246020,HORVU.MOREX.r2.3HG0235650,HORVU.MOREX.r2.6HG0511220,HORVU.MOREX.r2.6HG0459050,HORVU.MOREX.r2.5HG0421310,HORVU.MOREX.r2.3HG0246000,HORVU.MOREX.r2.2HG0136710,HORVU.MOREX.r2.7HG0558950,HORVU.MOREX.r2.5HG0362320,HORVU.MOR…	0.0141453	0.464961	0.0213729
138	61	225	0	27	20	HORVU.MOREX.r2.7HG0550400,HORVU.MOREX.r2.7HG0528420,HORVU.MOREX.r2.7HG0527390,HORVU.MOREX.r2.4HG0291260,HORVU.MOREX.r2.7HG0528480,HORVU.MOREX.r2.7HG0567710,HORVU.MOREX.r2.1HG0001710,HORVU.MOREX.r2.4HG0286450,HORVU.MOREX.r2.7HG0550010,HORVU.MOREX.r2.1HG0002560,HORVU.MOREX.r2.1HG0003750,HORVU.MOREX.r2.1HG0003500,HORVU.MOREX.r2.7HG0527920,HORVU.MOREX.r2.1HG0003400,HORVU.MOREX.r2.4HG0284730,HORVU.MOR…	HORVU.MOREX.r2.7HG0583800,HORVU.MOREX.r2.7HG0527240,HORVU.MOREX.r2.7HG0527370,HORVU.MOREX.r2.7HG0554720,HORVU.MOREX.r2.5HG0373950,HORVU.MOREX.r2.3HG0212230,HORVU.MOREX.r2.4HG0286790,HORVU.MOREX.r2.1HG0052160,HORVU.MOREX.r2.1HG0031510,HORVU.MOREX.r2.4HG0338920,HORVU.MOREX.r2.1HG0019760,HORVU.MOREX.r2.6HG0520000,HORVU.MOREX.r2.4HG0284560,HORVU.MOREX.r2.7HG0581720,HORVU.MOREX.r2.7HG0528250,HORVU.MOR…	HORVU.MOREX.r2.3HG0230410,HORVU.MOREX.r2.7HG0554720,HORVU.MOREX.r2.5HG0373950,HORVU.MOREX.r2.1HG0019760,HORVU.MOREX.r2.7HG0583800,HORVU.MOREX.r2.2HG0149190,HORVU.MOREX.r2.1HG0011090,HORVU.MOREX.r2.3HG0256400,HORVU.MOREX.r2.7HG0527240,HORVU.MOREX.r2.5HG0394680,HORVU.MOREX.r2.1HG0052160,HORVU.MOREX.r2.1HG0020380,HORVU.MOREX.r2.4HG0338920,HORVU.MOREX.r2.4HG0314460,HORVU.MOREX.r2.1HG0001980,HORVU.MOR…	0.014349	0.513926	0.0215235
139	30	39	0	7	8	HORVU.MOREX.r2.2HG0098650,HORVU.MOREX.r2.2HG0098990,HORVU.MOREX.r2.1HG0003070,HORVU.MOREX.r2.1HG0003500,HORVU.MOREX.r2.1HG0003750,HORVU.MOREX.r2.1HG0003400,HORVU.MOREX.r2.1HG0078080	HORVU.MOREX.r2.2HG0098980,HORVU.MOREX.r2.5HG0354240,HORVU.MOREX.r2.2HG0131310,HORVU.MOREX.r2.5HG0427930,HORVU.MOREX.r2.4HG0286590,HORVU.MOREX.r2.3HG0231680,HORVU.MOREX.r2.7HG0623480,HORVU.MOREX.r2.1HG0023690	HORVU.MOREX.r2.3HG0191690,HORVU.MOREX.r2.1HG0059260,HORVU.MOREX.r2.3HG0268560,HORVU.MOREX.r2.7HG0544700,HORVU.MOREX.r2.2HG0098980,HORVU.MOREX.r2.5HG0354240,HORVU.MOREX.r2.5HG0427930,HORVU.MOREX.r2.5HG0440770,HORVU.MOREX.r2.1HG0037500,HORVU.MOREX.r2.2HG0131310,HORVU.MOREX.r2.5HG0404180,HORVU.MOREX.r2.3HG0266510,HORVU.MOREX.r2.4HG0286590,HORVU.MOREX.r2.1HG0028810,HORVU.MOREX.r2.1HG0023690,HORVU.MOR…	0.0171948	0.383593	0.0256067
140	22	19	0	7	5	HORVU.MOREX.r2.7HG0601560,HORVU.MOREX.r2.7HG0601650,HORVU.MOREX.r2.1HG0003750,HORVU.MOREX.r2.1HG0003070,HORVU.MOREX.r2.1HG0003500,HORVU.MOREX.r2.7HG0601660,HORVU.MOREX.r2.1HG0003400	HORVU.MOREX.r2.2HG0143320,HORVU.MOREX.r2.4HG0315810,HORVU.MOREX.r2.3HG0209060,HORVU.MOREX.r2.7HG0602620,HORVU.MOREX.r2.7HG0601970	HORVU.MOREX.r2.4HG0343610,HORVU.MOREX.r2.7HG0602620,HORVU.MOREX.r2.6HG0462270,HORVU.MOREX.r2.7HG0617630,HORVU.MOREX.r2.4HG0341030,HORVU.MOREX.r2.4HG0344150,HORVU.MOREX.r2.4HG0341040,HORVU.MOREX.r2.4HG0341050,HORVU.MOREX.r2.3HG0192020,HORVU.MOREX.r2.2HG0143320,HORVU.MOREX.r2.2HG0091480,HORVU.MOREX.r2.7HG0572930,HORVU.MOREX.r2.3HG0269620,HORVU.MOREX.r2.7HG0601970,HORVU.MOREX.r2.4HG0338430,HORVU.MOR…	0.017706	0.310372	0.0256304
141	22	6	0	8	5	HORVU.MOREX.r2.2HG0180770,HORVU.MOREX.r2.1HG0003070,HORVU.MOREX.r2.2HG0176000,HORVU.MOREX.r2.2HG0175600,HORVU.MOREX.r2.2HG0176780,HORVU.MOREX.r2.1HG0003500,HORVU.MOREX.r2.1HG0003400,HORVU.MOREX.r2.2HG0181050	HORVU.MOREX.r2.5HG0428240,HORVU.MOREX.r2.2HG0177990,HORVU.MOREX.r2.4HG0325660,HORVU.MOREX.r2.2HG0166910,HORVU.MOREX.r2.2HG0176250	HORVU.MOREX.r2.4HG0332210,HORVU.MOREX.r2.4HG0325660,HORVU.MOREX.r2.2HG0166910,HORVU.MOREX.r2.7HG0537330,HORVU.MOREX.r2.6HG0498990,HORVU.MOREX.r2.7HG0529350,HORVU.MOREX.r2.2HG0177990,HORVU.MOREX.r2.1HG0078660,HORVU.MOREX.r2.7HG0600530,HORVU.MOREX.r2.5HG0371160,HORVU.MOREX.r2.6HG0474300,HORVU.MOREX.r2.1HG0002190,HORVU.MOREX.r2.2HG0172430,HORVU.MOREX.r2.5HG0428240,HORVU.MOREX.r2.1HG0023790,HORVU.MOR…	0.017706	0.310372	0.0256304
142	22	64	0	17	5	HORVU.MOREX.r2.4HG0291260,HORVU.MOREX.r2.5HG0412560,HORVU.MOREX.r2.1HG0002560,HORVU.MOREX.r2.1HG0002570,HORVU.MOREX.r2.4HG0342570,HORVU.MOREX.r2.5HG0412730,HORVU.MOREX.r2.1HG0001750,HORVU.MOREX.r2.5HG0412310,HORVU.MOREX.r2.5HG0412370,HORVU.MOREX.r2.5HG0412940,HORVU.MOREX.r2.1HG0002180,HORVU.MOREX.r2.4HG0343120,HORVU.MOREX.r2.1HG0078080,HORVU.MOREX.r2.5HG0412170,HORVU.MOREX.r2.5HG0412380,HORVU.MOR…	HORVU.MOREX.r2.5HG0394640,HORVU.MOREX.r2.3HG0210600,HORVU.MOREX.r2.5HG0412410,HORVU.MOREX.r2.4HG0343110,HORVU.MOREX.r2.1HG0031900	HORVU.MOREX.r2.1HG0046300,HORVU.MOREX.r2.3HG0211860,HORVU.MOREX.r2.1HG0031900,HORVU.MOREX.r2.4HG0346740,HORVU.MOREX.r2.7HG0544690,HORVU.MOREX.r2.1HG0070120,HORVU.MOREX.r2.1HG0034750,HORVU.MOREX.r2.4HG0308280,HORVU.MOREX.r2.6HG0511470,HORVU.MOREX.r2.5HG0394640,HORVU.MOREX.r2.7HG0572510,HORVU.MOREX.r2.5HG0433500,HORVU.MOREX.r2.7HG0554710,HORVU.MOREX.r2.3HG0210600,HORVU.MOREX.r2.5HG0412410,HORVU.MOR…	0.017706	0.310372	0.0256304
143	22	23	0	3	5	HORVU.MOREX.r2.1HG0003070,HORVU.MOREX.r2.1HG0003500,HORVU.MOREX.r2.1HG0003400	HORVU.MOREX.r2.5HG0360080,HORVU.MOREX.r2.5HG0401910,HORVU.MOREX.r2.5HG0432000,HORVU.MOREX.r2.7HG0552030,HORVU.MOREX.r2.5HG0422780	HORVU.MOREX.r2.6HG0503700,HORVU.MOREX.r2.4HG0333430,HORVU.MOREX.r2.7HG0595870,HORVU.MOREX.r2.4HG0328340,HORVU.MOREX.r2.5HG0432000,HORVU.MOREX.r2.5HG0422780,HORVU.MOREX.r2.4HG0286270,HORVU.MOREX.r2.7HG0587690,HORVU.MOREX.r2.6HG0509430,HORVU.MOREX.r2.5HG0401910,HORVU.MOREX.r2.7HG0567810,HORVU.MOREX.r2.7HG0603180,HORVU.MOREX.r2.7HG0552030,HORVU.MOREX.r2.5HG0359050,HORVU.MOREX.r2.5HG0360080,HORVU.MOR…	0.017706	0.310372	0.0256304
144	27	47	0	22	7	HORVU.MOREX.r2.5HG0433720,HORVU.MOREX.r2.5HG0434780,HORVU.MOREX.r2.5HG0434130,HORVU.MOREX.r2.5HG0434820,HORVU.MOREX.r2.5HG0435040,HORVU.MOREX.r2.1HG0003750,HORVU.MOREX.r2.5HG0434680,HORVU.MOREX.r2.1HG0003500,HORVU.MOREX.r2.1HG0004200,HORVU.MOREX.r2.5HG0434260,HORVU.MOREX.r2.5HG0434150,HORVU.MOREX.r2.5HG0433840,HORVU.MOREX.r2.5HG0434380,HORVU.MOREX.r2.1HG0003400,HORVU.MOREX.r2.4HG0342570,HORVU.MOR…	HORVU.MOREX.r2.5HG0444660,HORVU.MOREX.r2.6HG0480120,HORVU.MOREX.r2.5HG0434160,HORVU.MOREX.r2.4HG0342540,HORVU.MOREX.r2.7HG0594080,HORVU.MOREX.r2.1HG0032080,HORVU.MOREX.r2.5HG0407450	HORVU.MOREX.r2.6HG0481070,HORVU.MOREX.r2.4HG0348350,HORVU.MOREX.r2.4HG0277180,HORVU.MOREX.r2.4HG0326540,HORVU.MOREX.r2.1HG0049810,HORVU.MOREX.r2.5HG0415070,HORVU.MOREX.r2.6HG0513860,HORVU.MOREX.r2.5HG0436790,HORVU.MOREX.r2.1HG0077910,HORVU.MOREX.r2.7HG0595190,HORVU.MOREX.r2.6HG0480120,HORVU.MOREX.r2.3HG0222430,HORVU.MOREX.r2.4HG0342540,HORVU.MOREX.r2.5HG0429550,HORVU.MOREX.r2.7HG0594080,HORVU.MOR…	0.0202468	0.369277	0.0291048
145	20	40	0	5	15	HORVU.MOREX.r2.4HG0289920,HORVU.MOREX.r2.4HG0286680,HORVU.MOREX.r2.2HG0178910,HORVU.MOREX.r2.2HG0178800,HORVU.MOREX.r2.2HG0179230	HORVU.MOREX.r2.2HG0171640,HORVU.MOREX.r2.4HG0286650,HORVU.MOREX.r2.4HG0286120,HORVU.MOREX.r2.4HG0287230,HORVU.MOREX.r2.2HG0179990,HORVU.MOREX.r2.4HG0294290,HORVU.MOREX.r2.2HG0179580,HORVU.MOREX.r2.4HG0319390,HORVU.MOREX.r2.2HG0086750,HORVU.MOREX.r2.4HG0320220,HORVU.MOREX.r2.2HG0181090,HORVU.MOREX.r2.4HG0286660,HORVU.MOREX.r2.2HG0179150,HORVU.MOREX.r2.4HG0299270,HORVU.MOREX.r2.5HG0434170	HORVU.MOREX.r2.4HG0320220,HORVU.MOREX.r2.4HG0286650,HORVU.MOREX.r2.2HG0171640,HORVU.MOREX.r2.4HG0286120,HORVU.MOREX.r2.4HG0287230,HORVU.MOREX.r2.2HG0179990,HORVU.MOREX.r2.4HG0294290,HORVU.MOREX.r2.2HG0179580,HORVU.MOREX.r2.4HG0319390,HORVU.MOREX.r2.2HG0086750,HORVU.MOREX.r2.4HG0299270,HORVU.MOREX.r2.2HG0181090,HORVU.MOREX.r2.4HG0286660,HORVU.MOREX.r2.2HG0179150,HORVU.MOREX.r2.5HG0434170	0.0234057	3.17999	0.0334136
146	24	65	0	15	6	HORVU.MOREX.r2.1HG0001750,HORVU.MOREX.r2.5HG0398100,HORVU.MOREX.r2.1HG0002570,HORVU.MOREX.r2.1HG0003750,HORVU.MOREX.r2.4HG0291260,HORVU.MOREX.r2.1HG0003070,HORVU.MOREX.r2.1HG0005040,HORVU.MOREX.r2.5HG0398680,HORVU.MOREX.r2.1HG0002180,HORVU.MOREX.r2.1HG0003500,HORVU.MOREX.r2.5HG0398400,HORVU.MOREX.r2.1HG0001710,HORVU.MOREX.r2.1HG0002560,HORVU.MOREX.r2.1HG0003400,HORVU.MOREX.r2.1HG0078080	HORVU.MOREX.r2.5HG0367340,HORVU.MOREX.r2.3HG0232920,HORVU.MOREX.r2.1HG0033960,HORVU.MOREX.r2.1HG0046830,HORVU.MOREX.r2.1HG0069340,HORVU.MOREX.r2.3HG0210600	HORVU.MOREX.r2.4HG0343780,HORVU.MOREX.r2.7HG0604070,HORVU.MOREX.r2.3HG0210600,HORVU.MOREX.r2.7HG0622410,HORVU.MOREX.r2.6HG0469430,HORVU.MOREX.r2.7HG0566300,HORVU.MOREX.r2.6HG0526780,HORVU.MOREX.r2.6HG0464630,HORVU.MOREX.r2.4HG0295720,HORVU.MOREX.r2.1HG0034750,HORVU.MOREX.r2.3HG0232920,HORVU.MOREX.r2.4HG0314260,HORVU.MOREX.r2.1HG0033960,HORVU.MOREX.r2.1HG0046830,HORVU.MOREX.r2.5HG0410830,HORVU.MOR…	0.0237454	0.351759	0.0336665
147	29	21	0	9	8	HORVU.MOREX.r2.6HG0463100,HORVU.MOREX.r2.2HG0087620,HORVU.MOREX.r2.1HG0003750,HORVU.MOREX.r2.1HG0003070,HORVU.MOREX.r2.2HG0087670,HORVU.MOREX.r2.1HG0003500,HORVU.MOREX.r2.1HG0006400,HORVU.MOREX.r2.1HG0003400,HORVU.MOREX.r2.1HG0078080	HORVU.MOREX.r2.6HG0463090,HORVU.MOREX.r2.3HG0252790,HORVU.MOREX.r2.2HG0086020,HORVU.MOREX.r2.5HG0440740,HORVU.MOREX.r2.2HG0085980,HORVU.MOREX.r2.1HG0056950,HORVU.MOREX.r2.2HG0086010,HORVU.MOREX.r2.1HG0029020	HORVU.MOREX.r2.3HG0252790,HORVU.MOREX.r2.5HG0426350,HORVU.MOREX.r2.2HG0086020,HORVU.MOREX.r2.2HG0132020,HORVU.MOREX.r2.1HG0068540,HORVU.MOREX.r2.4HG0327900,HORVU.MOREX.r2.2HG0164620,HORVU.MOREX.r2.2HG0085980,HORVU.MOREX.r2.3HG0248040,HORVU.MOREX.r2.5HG0440740,HORVU.MOREX.r2.1HG0015850,HORVU.MOREX.r2.5HG0436120,HORVU.MOREX.r2.3HG0256310,HORVU.MOREX.r2.1HG0007670,HORVU.MOREX.r2.6HG0504040,HORVU.MOR…	0.0255017	0.401939	0.0359106
148	59	86	0	22	20	HORVU.MOREX.r2.4HG0335240,HORVU.MOREX.r2.4HG0291260,HORVU.MOREX.r2.1HG0078200,HORVU.MOREX.r2.1HG0078540,HORVU.MOREX.r2.1HG0001710,HORVU.MOREX.r2.1HG0002560,HORVU.MOREX.r2.1HG0003750,HORVU.MOREX.r2.1HG0003500,HORVU.MOREX.r2.1HG0078050,HORVU.MOREX.r2.1HG0003400,HORVU.MOREX.r2.3HG0204200,HORVU.MOREX.r2.4HG0334770,HORVU.MOREX.r2.1HG0078680,HORVU.MOREX.r2.4HG0286540,HORVU.MOREX.r2.1HG0078550,HORVU.MOR…	HORVU.MOREX.r2.4HG0317680,HORVU.MOREX.r2.1HG0037750,HORVU.MOREX.r2.3HG0232520,HORVU.MOREX.r2.1HG0061820,HORVU.MOREX.r2.4HG0315130,HORVU.MOREX.r2.4HG0341380,HORVU.MOREX.r2.2HG0167690,HORVU.MOREX.r2.4HG0310860,HORVU.MOREX.r2.6HG0523490,HORVU.MOREX.r2.7HG0558720,HORVU.MOREX.r2.7HG0527260,HORVU.MOREX.r2.6HG0496180,HORVU.MOREX.r2.5HG0416920,HORVU.MOREX.r2.4HG0323710,HORVU.MOREX.r2.4HG0330680,HORVU.MOR…	HORVU.MOREX.r2.5HG0366920,HORVU.MOREX.r2.4HG0330680,HORVU.MOREX.r2.5HG0387750,HORVU.MOREX.r2.6HG0490240,HORVU.MOREX.r2.4HG0341380,HORVU.MOREX.r2.2HG0161910,HORVU.MOREX.r2.7HG0558720,HORVU.MOREX.r2.6HG0496180,HORVU.MOREX.r2.5HG0416920,HORVU.MOREX.r2.2HG0105740,HORVU.MOREX.r2.7HG0595080,HORVU.MOREX.r2.2HG0091490,HORVU.MOREX.r2.5HG0383720,HORVU.MOREX.r2.7HG0599700,HORVU.MOREX.r2.3HG0202190,HORVU.MOR…	0.026056	0.540497	0.0364432
149	21	18	0	5	5	HORVU.MOREX.r2.1HG0003750,HORVU.MOREX.r2.1HG0001030,HORVU.MOREX.r2.1HG0003500,HORVU.MOREX.r2.1HG0003400,HORVU.MOREX.r2.1HG0003070	HORVU.MOREX.r2.3HG0255750,HORVU.MOREX.r2.6HG0471020,HORVU.MOREX.r2.2HG0166680,HORVU.MOREX.r2.3HG0249020,HORVU.MOREX.r2.1HG0055260	HORVU.MOREX.r2.1HG0021270,HORVU.MOREX.r2.6HG0471020,HORVU.MOREX.r2.6HG0474240,HORVU.MOREX.r2.5HG0361360,HORVU.MOREX.r2.7HG0613950,HORVU.MOREX.r2.1HG0061050,HORVU.MOREX.r2.3HG0257110,HORVU.MOREX.r2.2HG0166680,HORVU.MOREX.r2.7HG0617060,HORVU.MOREX.r2.3HG0255750,HORVU.MOREX.r2.3HG0249020,HORVU.MOREX.r2.1HG0051630,HORVU.MOREX.r2.1HG0055200,HORVU.MOREX.r2.1HG0035900,HORVU.MOREX.r2.1HG0050780,HORVU.MOR…	0.0276684	0.329836	0.0381823
150	21	30	0	4	5	HORVU.MOREX.r2.1HG0003070,HORVU.MOREX.r2.1HG0003500,HORVU.MOREX.r2.3HG0181630,HORVU.MOREX.r2.1HG0003400	HORVU.MOREX.r2.3HG0184790,HORVU.MOREX.r2.7HG0613400,HORVU.MOREX.r2.4HG0295930,HORVU.MOREX.r2.5HG0385600,HORVU.MOREX.r2.2HG0110800	HORVU.MOREX.r2.4HG0275940,HORVU.MOREX.r2.3HG0184790,HORVU.MOREX.r2.4HG0295930,HORVU.MOREX.r2.5HG0385600,HORVU.MOREX.r2.4HG0325000,HORVU.MOREX.r2.7HG0550870,HORVU.MOREX.r2.1HG0055140,HORVU.MOREX.r2.6HG0472890,HORVU.MOREX.r2.2HG0109550,HORVU.MOREX.r2.4HG0300240,HORVU.MOREX.r2.2HG0109390,HORVU.MOREX.r2.5HG0370990,HORVU.MOREX.r2.4HG0338140,HORVU.MOREX.r2.2HG0125800,HORVU.MOREX.r2.4HG0329740,HORVU.MOR…	0.0276684	0.329836	0.0381823
151	26	66	0	14	7	HORVU.MOREX.r2.7HG0591940,HORVU.MOREX.r2.7HG0588640,HORVU.MOREX.r2.7HG0590460,HORVU.MOREX.r2.1HG0003750,HORVU.MOREX.r2.7HG0589750,HORVU.MOREX.r2.1HG0003070,HORVU.MOREX.r2.1HG0003400,HORVU.MOREX.r2.7HG0591410,HORVU.MOREX.r2.1HG0003500,HORVU.MOREX.r2.7HG0592120,HORVU.MOREX.r2.7HG0591580,HORVU.MOREX.r2.7HG0585580,HORVU.MOREX.r2.7HG0590580,HORVU.MOREX.r2.7HG0591540	HORVU.MOREX.r2.4HG0320870,HORVU.MOREX.r2.6HG0458690,HORVU.MOREX.r2.7HG0598390,HORVU.MOREX.r2.6HG0499320,HORVU.MOREX.r2.7HG0602950,HORVU.MOREX.r2.7HG0592090,HORVU.MOREX.r2.1HG0023650	HORVU.MOREX.r2.1HG0006050,HORVU.MOREX.r2.1HG0044460,HORVU.MOREX.r2.5HG0404270,HORVU.MOREX.r2.6HG0458690,HORVU.MOREX.r2.7HG0592090,HORVU.MOREX.r2.5HG0404230,HORVU.MOREX.r2.1HG0023650,HORVU.MOREX.r2.2HG0156660,HORVU.MOREX.r2.7HG0580730,HORVU.MOREX.r2.1HG0044540,HORVU.MOREX.r2.2HG0150720,HORVU.MOREX.r2.5HG0404200,HORVU.MOREX.r2.7HG0538280,HORVU.MOREX.r2.4HG0346560,HORVU.MOREX.r2.7HG0598390,HORVU.MOR…	0.0303643	0.38879	0.0416253
152	49	106	0	19	16	HORVU.MOREX.r2.7HG0553840,HORVU.MOREX.r2.7HG0551080,HORVU.MOREX.r2.1HG0064120,HORVU.MOREX.r2.2HG0106820,HORVU.MOREX.r2.1HG0064940,HORVU.MOREX.r2.1HG0056240,HORVU.MOREX.r2.7HG0554850,HORVU.MOREX.r2.1HG0003070,HORVU.MOREX.r2.7HG0554060,HORVU.MOREX.r2.7HG0552160,HORVU.MOREX.r2.1HG0064460,HORVU.MOREX.r2.1HG0003500,HORVU.MOREX.r2.7HG0553740,HORVU.MOREX.r2.1HG0003750,HORVU.MOREX.r2.1HG0064450,HORVU.MOR…	HORVU.MOREX.r2.1HG0064150,HORVU.MOREX.r2.3HG0193550,HORVU.MOREX.r2.7HG0552550,HORVU.MOREX.r2.1HG0064170,HORVU.MOREX.r2.1HG0064430,HORVU.MOREX.r2.1HG0066610,HORVU.MOREX.r2.1HG0056280,HORVU.MOREX.r2.4HG0282300,HORVU.MOREX.r2.1HG0063860,HORVU.MOREX.r2.1HG0064000,HORVU.MOREX.r2.4HG0334350,HORVU.MOREX.r2.1HG0064590,HORVU.MOREX.r2.1HG0064690,HORVU.MOREX.r2.1HG0056300,HORVU.MOREX.r2.3HG0252760,HORVU.MOR…	HORVU.MOREX.r2.1HG0054070,HORVU.MOREX.r2.7HG0613370,HORVU.MOREX.r2.3HG0227990,HORVU.MOREX.r2.1HG0064430,HORVU.MOREX.r2.1HG0075570,HORVU.MOREX.r2.1HG0056280,HORVU.MOREX.r2.1HG0063860,HORVU.MOREX.r2.UnG0628900,HORVU.MOREX.r2.3HG0191650,HORVU.MOREX.r2.1HG0046470,HORVU.MOREX.r2.1HG0064590,HORVU.MOREX.r2.3HG0191730,HORVU.MOREX.r2.3HG0252730,HORVU.MOREX.r2.4HG0331860,HORVU.MOREX.r2.3HG0209300,HORVU.MOR…	0.0308028	0.511197	0.0419486
153	53	179	0	22	18	HORVU.MOREX.r2.4HG0291260,HORVU.MOREX.r2.4HG0337620,HORVU.MOREX.r2.3HG0253360,HORVU.MOREX.r2.3HG0254010,HORVU.MOREX.r2.1HG0001710,HORVU.MOREX.r2.1HG0002560,HORVU.MOREX.r2.1HG0003750,HORVU.MOREX.r2.3HG0254040,HORVU.MOREX.r2.2HG0162870,HORVU.MOREX.r2.1HG0003500,HORVU.MOREX.r2.1HG0003400,HORVU.MOREX.r2.2HG0163570,HORVU.MOREX.r2.3HG0239860,HORVU.MOREX.r2.3HG0239810,HORVU.MOREX.r2.1HG0002570,HORVU.MOR…	HORVU.MOREX.r2.5HG0423580,HORVU.MOREX.r2.6HG0499400,HORVU.MOREX.r2.3HG0239380,HORVU.MOREX.r2.1HG0043590,HORVU.MOREX.r2.5HG0445890,HORVU.MOREX.r2.2HG0163480,HORVU.MOREX.r2.7HG0602800,HORVU.MOREX.r2.3HG0261030,HORVU.MOREX.r2.3HG0253370,HORVU.MOREX.r2.7HG0538650,HORVU.MOREX.r2.7HG0550390,HORVU.MOREX.r2.4HG0281140,HORVU.MOREX.r2.4HG0325660,HORVU.MOREX.r2.5HG0430010,HORVU.MOREX.r2.6HG0515080,HORVU.MOR…	HORVU.MOREX.r2.4HG0325660,HORVU.MOREX.r2.1HG0044450,HORVU.MOREX.r2.6HG0488430,HORVU.MOREX.r2.3HG0214280,HORVU.MOREX.r2.5HG0363550,HORVU.MOREX.r2.7HG0538650,HORVU.MOREX.r2.5HG0423580,HORVU.MOREX.r2.6HG0500840,HORVU.MOREX.r2.3HG0263480,HORVU.MOREX.r2.5HG0445890,HORVU.MOREX.r2.2HG0163480,HORVU.MOREX.r2.3HG0261030,HORVU.MOREX.r2.3HG0239380,HORVU.MOREX.r2.4HG0281140,HORVU.MOREX.r2.3HG0252260,HORVU.MOR…	0.0381693	0.542245	0.0516408
154	40	198	0	16	26	HORVU.MOREX.r2.1HG0078200,HORVU.MOREX.r2.1HG0001750,HORVU.MOREX.r2.1HG0002560,HORVU.MOREX.r2.1HG0002570,HORVU.MOREX.r2.1HG0078680,HORVU.MOREX.r2.4HG0291260,HORVU.MOREX.r2.1HG0003070,HORVU.MOREX.r2.1HG0002180,HORVU.MOREX.r2.1HG0078050,HORVU.MOREX.r2.UnG0630240,HORVU.MOREX.r2.1HG0078540,HORVU.MOREX.r2.1HG0003500,HORVU.MOREX.r2.1HG0078080,HORVU.MOREX.r2.1HG0003400,HORVU.MOREX.r2.1HG0001710,HORVU.MOR…	HORVU.MOREX.r2.5HG0422360,HORVU.MOREX.r2.6HG0488890,HORVU.MOREX.r2.5HG0416920,HORVU.MOREX.r2.4HG0283040,HORVU.MOREX.r2.7HG0555270,HORVU.MOREX.r2.2HG0093640,HORVU.MOREX.r2.7HG0554390,HORVU.MOREX.r2.2HG0132110,HORVU.MOREX.r2.2HG0103440,HORVU.MOREX.r2.4HG0291970,HORVU.MOREX.r2.7HG0534880,HORVU.MOREX.r2.5HG0430320,HORVU.MOREX.r2.4HG0339740,HORVU.MOREX.r2.5HG0414590,HORVU.MOREX.r2.6HG0463530,HORVU.MOR…	HORVU.MOREX.r2.5HG0422360,HORVU.MOREX.r2.6HG0488890,HORVU.MOREX.r2.5HG0416920,HORVU.MOREX.r2.4HG0283040,HORVU.MOREX.r2.7HG0555270,HORVU.MOREX.r2.2HG0093640,HORVU.MOREX.r2.7HG0554390,HORVU.MOREX.r2.2HG0132110,HORVU.MOREX.r2.2HG0103440,HORVU.MOREX.r2.4HG0291970,HORVU.MOREX.r2.7HG0534880,HORVU.MOREX.r2.3HG0243530,HORVU.MOREX.r2.5HG0430320,HORVU.MOREX.r2.4HG0339740,HORVU.MOREX.r2.5HG0414590,HORVU.MOR…	0.0399973	1.9696	0.0537626
155	79	288	0	45	29	HORVU.MOREX.r2.7HG0539830,HORVU.MOREX.r2.1HG0066030,HORVU.MOREX.r2.1HG0065920,HORVU.MOREX.r2.1HG0065680,HORVU.MOREX.r2.UnG0631250,HORVU.MOREX.r2.4HG0291260,HORVU.MOREX.r2.3HG0184030,HORVU.MOREX.r2.1HG0065460,HORVU.MOREX.r2.1HG0001710,HORVU.MOREX.r2.7HG0540350,HORVU.MOREX.r2.7HG0540230,HORVU.MOREX.r2.7HG0551080,HORVU.MOREX.r2.1HG0002560,HORVU.MOREX.r2.1HG0065490,HORVU.MOREX.r2.1HG0003750,HORVU.MOR…	HORVU.MOREX.r2.2HG0136060,HORVU.MOREX.r2.7HG0550890,HORVU.MOREX.r2.6HG0522550,HORVU.MOREX.r2.7HG0539930,HORVU.MOREX.r2.2HG0178540,HORVU.MOREX.r2.4HG0325400,HORVU.MOREX.r2.7HG0540000,HORVU.MOREX.r2.5HG0422890,HORVU.MOREX.r2.6HG0521730,HORVU.MOREX.r2.3HG0183840,HORVU.MOREX.r2.6HG0480450,HORVU.MOREX.r2.3HG0261560,HORVU.MOREX.r2.3HG0235810,HORVU.MOREX.r2.4HG0335030,HORVU.MOREX.r2.5HG0446940,HORVU.MOR…	HORVU.MOREX.r2.3HG0272760,HORVU.MOREX.r2.2HG0136060,HORVU.MOREX.r2.7HG0550890,HORVU.MOREX.r2.6HG0522550,HORVU.MOREX.r2.7HG0598710,HORVU.MOREX.r2.7HG0539930,HORVU.MOREX.r2.3HG0200670,HORVU.MOREX.r2.2HG0178540,HORVU.MOREX.r2.3HG0233730,HORVU.MOREX.r2.4HG0325400,HORVU.MOREX.r2.3HG0183620,HORVU.MOREX.r2.7HG0540000,HORVU.MOREX.r2.7HG0621340,HORVU.MOREX.r2.3HG0274420,HORVU.MOREX.r2.5HG0422890,HORVU.MOR…	0.0413189	0.611117	0.0551807
156	71	442	0	39	26	HORVU.MOREX.r2.3HG0205560,HORVU.MOREX.r2.3HG0210420,HORVU.MOREX.r2.3HG0209860,HORVU.MOREX.r2.3HG0225790,HORVU.MOREX.r2.4HG0291260,HORVU.MOREX.r2.3HG0209090,HORVU.MOREX.r2.1HG0001750,HORVU.MOREX.r2.3HG0232450,HORVU.MOREX.r2.1HG0001710,HORVU.MOREX.r2.2HG0143420,HORVU.MOREX.r2.1HG0002560,HORVU.MOREX.r2.3HG0229390,HORVU.MOREX.r2.3HG0226630,HORVU.MOREX.r2.3HG0210560,HORVU.MOREX.r2.1HG0003500,HORVU.MOR…	HORVU.MOREX.r2.2HG0094200,HORVU.MOREX.r2.2HG0144040,HORVU.MOREX.r2.3HG0215350,HORVU.MOREX.r2.3HG0230780,HORVU.MOREX.r2.3HG0229860,HORVU.MOREX.r2.3HG0209210,HORVU.MOREX.r2.3HG0205440,HORVU.MOREX.r2.7HG0550830,HORVU.MOREX.r2.7HG0563040,HORVU.MOREX.r2.3HG0222920,HORVU.MOREX.r2.3HG0225580,HORVU.MOREX.r2.7HG0601460,HORVU.MOREX.r2.3HG0233160,HORVU.MOREX.r2.3HG0195220,HORVU.MOREX.r2.2HG0109180,HORVU.MOR…	HORVU.MOREX.r2.2HG0094200,HORVU.MOREX.r2.2HG0144040,HORVU.MOREX.r2.3HG0215350,HORVU.MOREX.r2.3HG0230780,HORVU.MOREX.r2.5HG0349230,HORVU.MOREX.r2.3HG0229860,HORVU.MOREX.r2.1HG0020240,HORVU.MOREX.r2.3HG0209210,HORVU.MOREX.r2.3HG0205440,HORVU.MOREX.r2.6HG0487850,HORVU.MOREX.r2.4HG0317910,HORVU.MOREX.r2.7HG0550830,HORVU.MOREX.r2.7HG0563040,HORVU.MOREX.r2.3HG0222920,HORVU.MOREX.r2.3HG0225580,HORVU.MOR…	0.0434813	0.608999	0.0576963
157	31	62	0	10	21	HORVU.MOREX.r2.2HG0180770,HORVU.MOREX.r2.7HG0604200,HORVU.MOREX.r2.7HG0603380,HORVU.MOREX.r2.7HG0603640,HORVU.MOREX.r2.2HG0176000,HORVU.MOREX.r2.2HG0176780,HORVU.MOREX.r2.2HG0175600,HORVU.MOREX.r2.6HG0509850,HORVU.MOREX.r2.7HG0603900,HORVU.MOREX.r2.2HG0181050	HORVU.MOREX.r2.5HG0352860,HORVU.MOREX.r2.2HG0180710,HORVU.MOREX.r2.2HG0176250,HORVU.MOREX.r2.4HG0338370,HORVU.MOREX.r2.2HG0181350,HORVU.MOREX.r2.7HG0603160,HORVU.MOREX.r2.2HG0176800,HORVU.MOREX.r2.7HG0602810,HORVU.MOREX.r2.7HG0604090,HORVU.MOREX.r2.2HG0177990,HORVU.MOREX.r2.7HG0604010,HORVU.MOREX.r2.2HG0180520,HORVU.MOREX.r2.2HG0176220,HORVU.MOREX.r2.5HG0395650,HORVU.MOREX.r2.2HG0177120,HORVU.MOR…	HORVU.MOREX.r2.5HG0352860,HORVU.MOREX.r2.2HG0176250,HORVU.MOREX.r2.2HG0177990,HORVU.MOREX.r2.4HG0338370,HORVU.MOREX.r2.2HG0181350,HORVU.MOREX.r2.7HG0603160,HORVU.MOREX.r2.2HG0176800,HORVU.MOREX.r2.7HG0602810,HORVU.MOREX.r2.7HG0604090,HORVU.MOREX.r2.2HG0177120,HORVU.MOREX.r2.2HG0176220,HORVU.MOREX.r2.2HG0180520,HORVU.MOREX.r2.7HG0604010,HORVU.MOREX.r2.5HG0395650,HORVU.MOREX.r2.2HG0180830,HORVU.MOR…	0.0460511	2.22659	0.0607171
158	27	46	0	34	8	HORVU.MOREX.r2.5HG0384030,HORVU.MOREX.r2.5HG0384050,HORVU.MOREX.r2.6HG0464080,HORVU.MOREX.r2.5HG0374410,HORVU.MOREX.r2.5HG0366280,HORVU.MOREX.r2.5HG0375540,HORVU.MOREX.r2.5HG0381870,HORVU.MOREX.r2.5HG0381090,HORVU.MOREX.r2.5HG0382660,HORVU.MOREX.r2.5HG0384070,HORVU.MOREX.r2.5HG0384340,HORVU.MOREX.r2.5HG0368540,HORVU.MOREX.r2.1HG0003500,HORVU.MOREX.r2.2HG0158780,HORVU.MOREX.r2.1HG0003400,HORVU.MOR…	HORVU.MOREX.r2.2HG0158240,HORVU.MOREX.r2.6HG0490630,HORVU.MOREX.r2.2HG0156990,HORVU.MOREX.r2.6HG0461780,HORVU.MOREX.r2.5HG0376600,HORVU.MOREX.r2.7HG0580950,HORVU.MOREX.r2.6HG0475730,HORVU.MOREX.r2.7HG0573130	HORVU.MOREX.r2.5HG0399850,HORVU.MOREX.r2.2HG0158240,HORVU.MOREX.r2.7HG0580950,HORVU.MOREX.r2.2HG0156990,HORVU.MOREX.r2.5HG0425630,HORVU.MOREX.r2.6HG0461780,HORVU.MOREX.r2.6HG0475730,HORVU.MOREX.r2.7HG0610390,HORVU.MOREX.r2.5HG0376600,HORVU.MOREX.r2.7HG0615380,HORVU.MOREX.r2.5HG0442980,HORVU.MOREX.r2.3HG0228460,HORVU.MOREX.r2.7HG0570110,HORVU.MOREX.r2.6HG0490630,HORVU.MOREX.r2.6HG0458020,HORVU.MOR…	0.0543934	0.444425	0.0712623
159	34	58	0	41	11	HORVU.MOREX.r2.5HG0384030,HORVU.MOREX.r2.5HG0384050,HORVU.MOREX.r2.5HG0374410,HORVU.MOREX.r2.5HG0366280,HORVU.MOREX.r2.1HG0078080,HORVU.MOREX.r2.5HG0375540,HORVU.MOREX.r2.5HG0381870,HORVU.MOREX.r2.5HG0381090,HORVU.MOREX.r2.5HG0382660,HORVU.MOREX.r2.1HG0003750,HORVU.MOREX.r2.1HG0001030,HORVU.MOREX.r2.5HG0384340,HORVU.MOREX.r2.5HG0368540,HORVU.MOREX.r2.5HG0385900,HORVU.MOREX.r2.1HG0003500,HORVU.MOR…	HORVU.MOREX.r2.6HG0522020,HORVU.MOREX.r2.5HG0371880,HORVU.MOREX.r2.3HG0182500,HORVU.MOREX.r2.6HG0486770,HORVU.MOREX.r2.1HG0059890,HORVU.MOREX.r2.1HG0003480,HORVU.MOREX.r2.1HG0017160,HORVU.MOREX.r2.2HG0146110,HORVU.MOREX.r2.5HG0429140,HORVU.MOREX.r2.5HG0381520,HORVU.MOREX.r2.3HG0206960	HORVU.MOREX.r2.5HG0371880,HORVU.MOREX.r2.5HG0446800,HORVU.MOREX.r2.5HG0438450,HORVU.MOREX.r2.7HG0613240,HORVU.MOREX.r2.1HG0059890,HORVU.MOREX.r2.2HG0083470,HORVU.MOREX.r2.3HG0251200,HORVU.MOREX.r2.4HG0286370,HORVU.MOREX.r2.1HG0017160,HORVU.MOREX.r2.5HG0381520,HORVU.MOREX.r2.2HG0101410,HORVU.MOREX.r2.6HG0486770,HORVU.MOREX.r2.4HG0324560,HORVU.MOREX.r2.1HG0003480,HORVU.MOREX.r2.6HG0522020,HORVU.MOR…	0.0605009	0.504725	0.0787654
160	29	46	0	28	19	HORVU.MOREX.r2.4HG0335240,HORVU.MOREX.r2.7HG0589750,HORVU.MOREX.r2.4HG0291260,HORVU.MOREX.r2.7HG0591580,HORVU.MOREX.r2.7HG0590580,HORVU.MOREX.r2.1HG0001710,HORVU.MOREX.r2.2HG0143420,HORVU.MOREX.r2.1HG0002560,HORVU.MOREX.r2.1HG0003750,HORVU.MOREX.r2.1HG0001030,HORVU.MOREX.r2.7HG0591410,HORVU.MOREX.r2.5HG0385900,HORVU.MOREX.r2.1HG0003500,HORVU.MOREX.r2.7HG0590460,HORVU.MOREX.r2.7HG0585580,HORVU.MOR…	HORVU.MOREX.r2.1HG0034220,HORVU.MOREX.r2.1HG0041900,HORVU.MOREX.r2.5HG0384510,HORVU.MOREX.r2.6HG0502510,HORVU.MOREX.r2.5HG0379180,HORVU.MOREX.r2.2HG0079830,HORVU.MOREX.r2.7HG0587860,HORVU.MOREX.r2.2HG0143620,HORVU.MOREX.r2.5HG0376770,HORVU.MOREX.r2.4HG0319700,HORVU.MOREX.r2.7HG0569130,HORVU.MOREX.r2.5HG0387050,HORVU.MOREX.r2.5HG0404130,HORVU.MOREX.r2.3HG0213070,HORVU.MOREX.r2.2HG0102880,HORVU.MOR…	HORVU.MOREX.r2.1HG0041900,HORVU.MOREX.r2.5HG0379180,HORVU.MOREX.r2.5HG0376770,HORVU.MOREX.r2.7HG0569130,HORVU.MOREX.r2.2HG0143620,HORVU.MOREX.r2.1HG0015010,HORVU.MOREX.r2.5HG0387050,HORVU.MOREX.r2.2HG0102880,HORVU.MOREX.r2.4HG0304810,HORVU.MOREX.r2.5HG0385480,HORVU.MOREX.r2.5HG0389880,HORVU.MOREX.r2.7HG0587860,HORVU.MOREX.r2.4HG0319700,HORVU.MOREX.r2.4HG0295830,HORVU.MOREX.r2.5HG0404130,HORVU.MOR…	0.0925427	2.01369	0.119727
161	30	123	0	10	10	HORVU.MOREX.r2.3HG0270250,HORVU.MOREX.r2.3HG0271180,HORVU.MOREX.r2.1HG0003070,HORVU.MOREX.r2.1HG0003750,HORVU.MOREX.r2.1HG0003500,HORVU.MOREX.r2.3HG0270990,HORVU.MOREX.r2.3HG0269970,HORVU.MOREX.r2.3HG0270590,HORVU.MOREX.r2.1HG0003400,HORVU.MOREX.r2.3HG0271590	HORVU.MOREX.r2.3HG0268850,HORVU.MOREX.r2.3HG0267250,HORVU.MOREX.r2.3HG0271040,HORVU.MOREX.r2.3HG0271070,HORVU.MOREX.r2.4HG0347300,HORVU.MOREX.r2.3HG0271620,HORVU.MOREX.r2.3HG0270270,HORVU.MOREX.r2.6HG0501060,HORVU.MOREX.r2.3HG0268810,HORVU.MOREX.r2.3HG0270440	HORVU.MOREX.r2.3HG0268850,HORVU.MOREX.r2.3HG0267250,HORVU.MOREX.r2.3HG0271040,HORVU.MOREX.r2.7HG0564570,HORVU.MOREX.r2.2HG0105060,HORVU.MOREX.r2.2HG0102990,HORVU.MOREX.r2.3HG0271070,HORVU.MOREX.r2.3HG0270270,HORVU.MOREX.r2.3HG0201500,HORVU.MOREX.r2.3HG0271620,HORVU.MOREX.r2.1HG0075820,HORVU.MOREX.r2.3HG0265320,HORVU.MOREX.r2.3HG0270440,HORVU.MOREX.r2.4HG0347300,HORVU.MOREX.r2.6HG0501060,HORVU.MOR…	0.102188	0.527871	0.13046
162	30	22	0	7	10	HORVU.MOREX.r2.2HG0079230,HORVU.MOREX.r2.3HG0188850,HORVU.MOREX.r2.4HG0284730,HORVU.MOREX.r2.7HG0534740,HORVU.MOREX.r2.3HG0189810,HORVU.MOREX.r2.3HG0189800,HORVU.MOREX.r2.4HG0284770	HORVU.MOREX.r2.2HG0079220,HORVU.MOREX.r2.3HG0189860,HORVU.MOREX.r2.3HG0188980,HORVU.MOREX.r2.2HG0079030,HORVU.MOREX.r2.7HG0535020,HORVU.MOREX.r2.3HG0190530,HORVU.MOREX.r2.7HG0534870,HORVU.MOREX.r2.4HG0284560,HORVU.MOREX.r2.7HG0535010,HORVU.MOREX.r2.3HG0189830	HORVU.MOREX.r2.2HG0079220,HORVU.MOREX.r2.6HG0458420,HORVU.MOREX.r2.1HG0069020,HORVU.MOREX.r2.4HG0301470,HORVU.MOREX.r2.3HG0188980,HORVU.MOREX.r2.1HG0045510,HORVU.MOREX.r2.7HG0535020,HORVU.MOREX.r2.3HG0190530,HORVU.MOREX.r2.3HG0242230,HORVU.MOREX.r2.7HG0534870,HORVU.MOREX.r2.2HG0079030,HORVU.MOREX.r2.4HG0278640,HORVU.MOREX.r2.4HG0284560,HORVU.MOREX.r2.5HG0445130,HORVU.MOREX.r2.5HG0350170,HORVU.MOR…	0.102188	0.527871	0.13046
163	38	136	0	22	13	HORVU.MOREX.r2.1HG0046990,HORVU.MOREX.r2.1HG0033530,HORVU.MOREX.r2.1HG0038610,HORVU.MOREX.r2.1HG0038640,HORVU.MOREX.r2.1HG0038950,HORVU.MOREX.r2.1HG0039700,HORVU.MOREX.r2.1HG0038680,HORVU.MOREX.r2.1HG0039130,HORVU.MOREX.r2.1HG0039540,HORVU.MOREX.r2.1HG0033160,HORVU.MOREX.r2.1HG0015630,HORVU.MOREX.r2.1HG0047090,HORVU.MOREX.r2.1HG0026180,HORVU.MOREX.r2.1HG0034210,HORVU.MOREX.r2.1HG0042450,HORVU.MOR…	HORVU.MOREX.r2.1HG0047130,HORVU.MOREX.r2.1HG0047120,HORVU.MOREX.r2.1HG0047370,HORVU.MOREX.r2.1HG0047400,HORVU.MOREX.r2.1HG0038910,HORVU.MOREX.r2.1HG0030330,HORVU.MOREX.r2.7HG0529360,HORVU.MOREX.r2.1HG0017270,HORVU.MOREX.r2.4HG0306930,HORVU.MOREX.r2.1HG0032240,HORVU.MOREX.r2.1HG0024740,HORVU.MOREX.r2.1HG0032680,HORVU.MOREX.r2.1HG0016570	HORVU.MOREX.r2.1HG0047130,HORVU.MOREX.r2.1HG0047120,HORVU.MOREX.r2.1HG0047370,HORVU.MOREX.r2.1HG0047400,HORVU.MOREX.r2.1HG0038910,HORVU.MOREX.r2.1HG0030330,HORVU.MOREX.r2.7HG0529360,HORVU.MOREX.r2.1HG0016570,HORVU.MOREX.r2.4HG0306930,HORVU.MOREX.r2.1HG0032240,HORVU.MOREX.r2.1HG0024740,HORVU.MOREX.r2.1HG0032680,HORVU.MOREX.r2.1HG0017270	0.10273	0.548786	0.13046
164	32	62	0	14	11	HORVU.MOREX.r2.7HG0539830,HORVU.MOREX.r2.7HG0540350,HORVU.MOREX.r2.7HG0540230,HORVU.MOREX.r2.1HG0075930,HORVU.MOREX.r2.UnG0631250,HORVU.MOREX.r2.1HG0003070,HORVU.MOREX.r2.1HG0005040,HORVU.MOREX.r2.7HG0539630,HORVU.MOREX.r2.1HG0003500,HORVU.MOREX.r2.1HG0075910,HORVU.MOREX.r2.1HG0003750,HORVU.MOREX.r2.7HG0540180,HORVU.MOREX.r2.1HG0003400,HORVU.MOREX.r2.7HG0540300	HORVU.MOREX.r2.7HG0589230,HORVU.MOREX.r2.4HG0340370,HORVU.MOREX.r2.4HG0277590,HORVU.MOREX.r2.7HG0539920,HORVU.MOREX.r2.2HG0096630,HORVU.MOREX.r2.3HG0236950,HORVU.MOREX.r2.5HG0352570,HORVU.MOREX.r2.1HG0074710,HORVU.MOREX.r2.1HG0073250,HORVU.MOREX.r2.3HG0218290,HORVU.MOREX.r2.6HG0493950	HORVU.MOREX.r2.4HG0340370,HORVU.MOREX.r2.1HG0045540,HORVU.MOREX.r2.3HG0273490,HORVU.MOREX.r2.1HG0045020,HORVU.MOREX.r2.3HG0236950,HORVU.MOREX.r2.6HG0515070,HORVU.MOREX.r2.7HG0621340,HORVU.MOREX.r2.3HG0274420,HORVU.MOREX.r2.3HG0218290,HORVU.MOREX.r2.5HG0369760,HORVU.MOREX.r2.7HG0549280,HORVU.MOREX.r2.2HG0105640,HORVU.MOREX.r2.1HG0073250,HORVU.MOREX.r2.7HG0589230,HORVU.MOREX.r2.4HG0277590,HORVU.MOR…	0.114074	0.553014	0.143983
165	34	78	0	9	12	HORVU.MOREX.r2.3HG0265860,HORVU.MOREX.r2.6HG0471630,HORVU.MOREX.r2.3HG0265830,HORVU.MOREX.r2.1HG0003070,HORVU.MOREX.r2.6HG0472920,HORVU.MOREX.r2.1HG0003500,HORVU.MOREX.r2.3HG0266500,HORVU.MOREX.r2.3HG0266480,HORVU.MOREX.r2.1HG0003400	HORVU.MOREX.r2.3HG0269480,HORVU.MOREX.r2.3HG0265950,HORVU.MOREX.r2.5HG0403270,HORVU.MOREX.r2.3HG0266850,HORVU.MOREX.r2.3HG0265850,HORVU.MOREX.r2.4HG0288510,HORVU.MOREX.r2.3HG0266100,HORVU.MOREX.r2.3HG0265280,HORVU.MOREX.r2.3HG0270520,HORVU.MOREX.r2.4HG0309820,HORVU.MOREX.r2.6HG0471290,HORVU.MOREX.r2.2HG0079930	HORVU.MOREX.r2.3HG0266850,HORVU.MOREX.r2.4HG0288510,HORVU.MOREX.r2.3HG0266100,HORVU.MOREX.r2.3HG0265280,HORVU.MOREX.r2.3HG0266430,HORVU.MOREX.r2.6HG0471290,HORVU.MOREX.r2.3HG0266210,HORVU.MOREX.r2.1HG0047170,HORVU.MOREX.r2.3HG0266640,HORVU.MOREX.r2.3HG0266050,HORVU.MOREX.r2.7HG0622400,HORVU.MOREX.r2.5HG0403270,HORVU.MOREX.r2.UnG0625320,HORVU.MOREX.r2.3HG0266190,HORVU.MOREX.r2.3HG0266030,HORVU.MOR…	0.125778	0.575872	0.157795
166	44	72	0	20	16	HORVU.MOREX.r2.5HG0440620,HORVU.MOREX.r2.7HG0545540,HORVU.MOREX.r2.7HG0532170,HORVU.MOREX.r2.4HG0334770,HORVU.MOREX.r2.1HG0075930,HORVU.MOREX.r2.1HG0003070,HORVU.MOREX.r2.4HG0286540,HORVU.MOREX.r2.6HG0505150,HORVU.MOREX.r2.7HG0532790,HORVU.MOREX.r2.5HG0424410,HORVU.MOREX.r2.7HG0531920,HORVU.MOREX.r2.6HG0505240,HORVU.MOREX.r2.1HG0003500,HORVU.MOREX.r2.1HG0075910,HORVU.MOREX.r2.4HG0335240,HORVU.MOR…	HORVU.MOREX.r2.5HG0398150,HORVU.MOREX.r2.7HG0532290,HORVU.MOREX.r2.5HG0440080,HORVU.MOREX.r2.3HG0214390,HORVU.MOREX.r2.4HG0329640,HORVU.MOREX.r2.7HG0531890,HORVU.MOREX.r2.7HG0532270,HORVU.MOREX.r2.3HG0196610,HORVU.MOREX.r2.7HG0561100,HORVU.MOREX.r2.7HG0531800,HORVU.MOREX.r2.1HG0074710,HORVU.MOREX.r2.7HG0531910,HORVU.MOREX.r2.5HG0380250,HORVU.MOREX.r2.7HG0532460,HORVU.MOREX.r2.6HG0505220,HORVU.MOR…	HORVU.MOREX.r2.6HG0514840,HORVU.MOREX.r2.4HG0285800,HORVU.MOREX.r2.5HG0363830,HORVU.MOREX.r2.7HG0531800,HORVU.MOREX.r2.6HG0514820,HORVU.MOREX.r2.7HG0546220,HORVU.MOREX.r2.5HG0425730,HORVU.MOREX.r2.5HG0380250,HORVU.MOREX.r2.7HG0532460,HORVU.MOREX.r2.7HG0531890,HORVU.MOREX.r2.4HG0319240,HORVU.MOREX.r2.7HG0532290,HORVU.MOREX.r2.4HG0301490,HORVU.MOREX.r2.7HG0532270,HORVU.MOREX.r2.2HG0162340,HORVU.MOR…	0.129984	0.603081	0.162088
167	22	44	0	13	7	HORVU.MOREX.r2.1HG0001750,HORVU.MOREX.r2.1HG0002560,HORVU.MOREX.r2.1HG0002570,HORVU.MOREX.r2.1HG0003750,HORVU.MOREX.r2.4HG0291260,HORVU.MOREX.r2.1HG0003070,HORVU.MOREX.r2.1HG0005040,HORVU.MOREX.r2.3HG0247470,HORVU.MOREX.r2.1HG0002180,HORVU.MOREX.r2.1HG0003500,HORVU.MOREX.r2.3HG0248510,HORVU.MOREX.r2.1HG0003400,HORVU.MOREX.r2.1HG0001710	HORVU.MOREX.r2.4HG0347860,HORVU.MOREX.r2.5HG0368980,HORVU.MOREX.r2.3HG0247500,HORVU.MOREX.r2.5HG0406360,HORVU.MOREX.r2.6HG0489540,HORVU.MOREX.r2.7HG0617640,HORVU.MOREX.r2.6HG0501850	HORVU.MOREX.r2.7HG0617640,HORVU.MOREX.r2.4HG0347860,HORVU.MOREX.r2.5HG0368980,HORVU.MOREX.r2.4HG0302490,HORVU.MOREX.r2.3HG0247500,HORVU.MOREX.r2.5HG0364500,HORVU.MOREX.r2.5HG0406360,HORVU.MOREX.r2.3HG0246220,HORVU.MOREX.r2.6HG0489540,HORVU.MOREX.r2.6HG0513670,HORVU.MOREX.r2.2HG0119820,HORVU.MOREX.r2.3HG0212800,HORVU.MOREX.r2.7HG0567570,HORVU.MOREX.r2.5HG0367100,HORVU.MOREX.r2.1HG0064440,HORVU.MOR…	0.136725	0.492859	0.168858
168	37	71	0	10	13	HORVU.MOREX.r2.2HG0143170,HORVU.MOREX.r2.7HG0604200,HORVU.MOREX.r2.1HG0003750,HORVU.MOREX.r2.7HG0603640,HORVU.MOREX.r2.1HG0003070,HORVU.MOREX.r2.5HG0404560,HORVU.MOREX.r2.1HG0003500,HORVU.MOREX.r2.7HG0603900,HORVU.MOREX.r2.5HG0359480,HORVU.MOREX.r2.1HG0003400	HORVU.MOREX.r2.6HG0522020,HORVU.MOREX.r2.7HG0583650,HORVU.MOREX.r2.1HG0066370,HORVU.MOREX.r2.3HG0222260,HORVU.MOREX.r2.6HG0490690,HORVU.MOREX.r2.5HG0394830,HORVU.MOREX.r2.5HG0359220,HORVU.MOREX.r2.4HG0296570,HORVU.MOREX.r2.3HG0254350,HORVU.MOREX.r2.3HG0254340,HORVU.MOREX.r2.2HG0146110,HORVU.MOREX.r2.2HG0107970,HORVU.MOREX.r2.5HG0404510	HORVU.MOREX.r2.7HG0583650,HORVU.MOREX.r2.1HG0066370,HORVU.MOREX.r2.5HG0394830,HORVU.MOREX.r2.6HG0490460,HORVU.MOREX.r2.3HG0264090,HORVU.MOREX.r2.4HG0285910,HORVU.MOREX.r2.3HG0254340,HORVU.MOREX.r2.2HG0107970,HORVU.MOREX.r2.6HG0490260,HORVU.MOREX.r2.4HG0343940,HORVU.MOREX.r2.1HG0049100,HORVU.MOREX.r2.4HG0331120,HORVU.MOREX.r2.1HG0039190,HORVU.MOREX.r2.6HG0490690,HORVU.MOREX.r2.2HG0140690,HORVU.MOR…	0.137044	0.571766	0.168858
169	36	81	0	31	13	HORVU.MOREX.r2.7HG0615630,HORVU.MOREX.r2.3HG0210420,HORVU.MOREX.r2.3HG0209860,HORVU.MOREX.r2.3HG0225790,HORVU.MOREX.r2.3HG0209090,HORVU.MOREX.r2.7HG0617000,HORVU.MOREX.r2.7HG0617100,HORVU.MOREX.r2.3HG0232450,HORVU.MOREX.r2.1HG0078080,HORVU.MOREX.r2.3HG0229390,HORVU.MOREX.r2.3HG0226630,HORVU.MOREX.r2.7HG0615910,HORVU.MOREX.r2.3HG0232840,HORVU.MOREX.r2.3HG0210560,HORVU.MOREX.r2.1HG0003500,HORVU.MOR…	HORVU.MOREX.r2.7HG0595920,HORVU.MOREX.r2.3HG0222920,HORVU.MOREX.r2.1HG0045370,HORVU.MOREX.r2.3HG0222240,HORVU.MOREX.r2.5HG0401370,HORVU.MOREX.r2.3HG0214550,HORVU.MOREX.r2.4HG0348890,HORVU.MOREX.r2.7HG0616250,HORVU.MOREX.r2.3HG0210900,HORVU.MOREX.r2.4HG0283500,HORVU.MOREX.r2.3HG0219750,HORVU.MOREX.r2.1HG0020600,HORVU.MOREX.r2.1HG0023690	HORVU.MOREX.r2.6HG0514130,HORVU.MOREX.r2.4HG0289540,HORVU.MOREX.r2.3HG0226690,HORVU.MOREX.r2.3HG0214550,HORVU.MOREX.r2.3HG0269620,HORVU.MOREX.r2.3HG0219750,HORVU.MOREX.r2.6HG0498050,HORVU.MOREX.r2.4HG0348600,HORVU.MOREX.r2.5HG0393640,HORVU.MOREX.r2.6HG0514370,HORVU.MOREX.r2.3HG0250850,HORVU.MOREX.r2.6HG0471210,HORVU.MOREX.r2.5HG0401370,HORVU.MOREX.r2.7HG0572930,HORVU.MOREX.r2.7HG0616250,HORVU.MOR…	0.180682	0.596743	0.221309
170	62	42	0	13	25	HORVU.MOREX.r2.1HG0078200,HORVU.MOREX.r2.1HG0003750,HORVU.MOREX.r2.1HG0001030,HORVU.MOREX.r2.1HG0003070,HORVU.MOREX.r2.UnG0630240,HORVU.MOREX.r2.1HG0003500,HORVU.MOREX.r2.1HG0078550,HORVU.MOREX.r2.1HG0078540,HORVU.MOREX.r2.1HG0078680,HORVU.MOREX.r2.1HG0078050,HORVU.MOREX.r2.7HG0597150,HORVU.MOREX.r2.1HG0003400,HORVU.MOREX.r2.1HG0078080	HORVU.MOREX.r2.5HG0354630,HORVU.MOREX.r2.2HG0079570,HORVU.MOREX.r2.6HG0497370,HORVU.MOREX.r2.1HG0018910,HORVU.MOREX.r2.2HG0125160,HORVU.MOREX.r2.7HG0545050,HORVU.MOREX.r2.7HG0598420,HORVU.MOREX.r2.3HG0182620,HORVU.MOREX.r2.3HG0239800,HORVU.MOREX.r2.4HG0316950,HORVU.MOREX.r2.7HG0528960,HORVU.MOREX.r2.4HG0339250,HORVU.MOREX.r2.6HG0515910,HORVU.MOREX.r2.7HG0617500,HORVU.MOREX.r2.7HG0535840,HORVU.MOR…	HORVU.MOREX.r2.2HG0116850,HORVU.MOREX.r2.5HG0354630,HORVU.MOREX.r2.6HG0497370,HORVU.MOREX.r2.2HG0079570,HORVU.MOREX.r2.3HG0249400,HORVU.MOREX.r2.3HG0242180,HORVU.MOREX.r2.7HG0609470,HORVU.MOREX.r2.5HG0396290,HORVU.MOREX.r2.1HG0018910,HORVU.MOREX.r2.2HG0125160,HORVU.MOREX.r2.7HG0545050,HORVU.MOREX.r2.7HG0598420,HORVU.MOREX.r2.3HG0182620,HORVU.MOREX.r2.3HG0213930,HORVU.MOREX.r2.7HG0548050,HORVU.MOR…	0.204185	0.713174	0.248305
171	30	47	0	10	11	HORVU.MOREX.r2.6HG0502370,HORVU.MOREX.r2.6HG0502880,HORVU.MOREX.r2.1HG0003750,HORVU.MOREX.r2.1HG0003070,HORVU.MOREX.r2.6HG0503330,HORVU.MOREX.r2.1HG0003500,HORVU.MOREX.r2.2HG0109440,HORVU.MOREX.r2.2HG0110620,HORVU.MOREX.r2.2HG0110160,HORVU.MOREX.r2.1HG0003400	HORVU.MOREX.r2.7HG0540790,HORVU.MOREX.r2.7HG0615620,HORVU.MOREX.r2.6HG0503070,HORVU.MOREX.r2.5HG0390370,HORVU.MOREX.r2.6HG0495360,HORVU.MOREX.r2.1HG0019030,HORVU.MOREX.r2.6HG0506720,HORVU.MOREX.r2.2HG0102940,HORVU.MOREX.r2.5HG0367400,HORVU.MOREX.r2.6HG0526860,HORVU.MOREX.r2.7HG0591440	HORVU.MOREX.r2.4HG0301470,HORVU.MOREX.r2.3HG0243270,HORVU.MOREX.r2.5HG0413340,HORVU.MOREX.r2.6HG0503070,HORVU.MOREX.r2.7HG0591440,HORVU.MOREX.r2.7HG0540790,HORVU.MOREX.r2.5HG0390370,HORVU.MOREX.r2.2HG0083700,HORVU.MOREX.r2.6HG0495360,HORVU.MOREX.r2.1HG0023790,HORVU.MOREX.r2.7HG0615620,HORVU.MOREX.r2.4HG0326360,HORVU.MOREX.r2.5HG0367400,HORVU.MOREX.r2.7HG0550690,HORVU.MOREX.r2.5HG0388240,HORVU.MOR…	0.205121	0.611468	0.248305
172	31	57	0	11	19	HORVU.MOREX.r2.2HG0158360,HORVU.MOREX.r2.4HG0336570,HORVU.MOREX.r2.2HG0158020,HORVU.MOREX.r2.2HG0157760,HORVU.MOREX.r2.4HG0337620,HORVU.MOREX.r2.4HG0336430,HORVU.MOREX.r2.2HG0157990,HORVU.MOREX.r2.2HG0158340,HORVU.MOREX.r2.4HG0337730,HORVU.MOREX.r2.2HG0157810,HORVU.MOREX.r2.2HG0157800	HORVU.MOREX.r2.2HG0157730,HORVU.MOREX.r2.4HG0336580,HORVU.MOREX.r2.6HG0516640,HORVU.MOREX.r2.3HG0208590,HORVU.MOREX.r2.4HG0333110,HORVU.MOREX.r2.4HG0344490,HORVU.MOREX.r2.4HG0337740,HORVU.MOREX.r2.7HG0546740,HORVU.MOREX.r2.4HG0336640,HORVU.MOREX.r2.3HG0181500,HORVU.MOREX.r2.6HG0499270,HORVU.MOREX.r2.7HG0583360,HORVU.MOREX.r2.1HG0067220,HORVU.MOREX.r2.6HG0463770,HORVU.MOREX.r2.4HG0335400,HORVU.MOR…	HORVU.MOREX.r2.2HG0157730,HORVU.MOREX.r2.4HG0336580,HORVU.MOREX.r2.6HG0516640,HORVU.MOREX.r2.3HG0208590,HORVU.MOREX.r2.4HG0333110,HORVU.MOREX.r2.4HG0344490,HORVU.MOREX.r2.4HG0337740,HORVU.MOREX.r2.7HG0546740,HORVU.MOREX.r2.4HG0336640,HORVU.MOREX.r2.3HG0181500,HORVU.MOREX.r2.6HG0499270,HORVU.MOREX.r2.7HG0583360,HORVU.MOREX.r2.1HG0067220,HORVU.MOREX.r2.4HG0335400,HORVU.MOREX.r2.4HG0334570,HORVU.MOR…	0.207192	1.67741	0.249353
173	68	220	0	25	28	HORVU.MOREX.r2.2HG0136610,HORVU.MOREX.r2.2HG0123500,HORVU.MOREX.r2.2HG0136750,HORVU.MOREX.r2.1HG0078080,HORVU.MOREX.r2.1HG0003750,HORVU.MOREX.r2.1HG0001030,HORVU.MOREX.r2.2HG0126790,HORVU.MOREX.r2.2HG0115460,HORVU.MOREX.r2.1HG0003500,HORVU.MOREX.r2.2HG0120170,HORVU.MOREX.r2.1HG0003400,HORVU.MOREX.r2.2HG0136120,HORVU.MOREX.r2.2HG0125890,HORVU.MOREX.r2.2HG0138110,HORVU.MOREX.r2.2HG0115960,HORVU.MOR…	HORVU.MOREX.r2.2HG0137040,HORVU.MOREX.r2.1HG0071250,HORVU.MOREX.r2.1HG0060440,HORVU.MOREX.r2.2HG0126140,HORVU.MOREX.r2.2HG0115240,HORVU.MOREX.r2.3HG0198250,HORVU.MOREX.r2.2HG0117400,HORVU.MOREX.r2.2HG0166380,HORVU.MOREX.r2.2HG0120940,HORVU.MOREX.r2.1HG0067250,HORVU.MOREX.r2.1HG0074060,HORVU.MOREX.r2.2HG0124890,HORVU.MOREX.r2.2HG0135990,HORVU.MOREX.r2.2HG0144990,HORVU.MOREX.r2.3HG0249470,HORVU.MOR…	HORVU.MOREX.r2.2HG0137040,HORVU.MOREX.r2.7HG0580730,HORVU.MOREX.r2.1HG0071250,HORVU.MOREX.r2.1HG0060440,HORVU.MOREX.r2.2HG0126140,HORVU.MOREX.r2.2HG0115240,HORVU.MOREX.r2.3HG0198250,HORVU.MOREX.r2.2HG0117400,HORVU.MOREX.r2.2HG0166380,HORVU.MOREX.r2.5HG0425680,HORVU.MOREX.r2.2HG0139100,HORVU.MOREX.r2.7HG0607090,HORVU.MOREX.r2.2HG0120940,HORVU.MOREX.r2.1HG0067250,HORVU.MOREX.r2.7HG0595460,HORVU.MOR…	0.226111	0.738873	0.27055
174	71	949	0	37	29	HORVU.MOREX.r2.5HG0384030,HORVU.MOREX.r2.5HG0398100,HORVU.MOREX.r2.5HG0384050,HORVU.MOREX.r2.5HG0374410,HORVU.MOREX.r2.5HG0398680,HORVU.MOREX.r2.5HG0366280,HORVU.MOREX.r2.5HG0375540,HORVU.MOREX.r2.5HG0381870,HORVU.MOREX.r2.5HG0381090,HORVU.MOREX.r2.5HG0382660,HORVU.MOREX.r2.5HG0384070,HORVU.MOREX.r2.7HG0534740,HORVU.MOREX.r2.5HG0384340,HORVU.MOREX.r2.5HG0368540,HORVU.MOREX.r2.5HG0385900,HORVU.MOR…	HORVU.MOREX.r2.5HG0371880,HORVU.MOREX.r2.5HG0419720,HORVU.MOREX.r2.5HG0368520,HORVU.MOREX.r2.5HG0398020,HORVU.MOREX.r2.1HG0058370,HORVU.MOREX.r2.5HG0387710,HORVU.MOREX.r2.5HG0375000,HORVU.MOREX.r2.5HG0376480,HORVU.MOREX.r2.5HG0375480,HORVU.MOREX.r2.7HG0535010,HORVU.MOREX.r2.5HG0379850,HORVU.MOREX.r2.5HG0381700,HORVU.MOREX.r2.5HG0376600,HORVU.MOREX.r2.1HG0011100,HORVU.MOREX.r2.5HG0382340,HORVU.MOR…	HORVU.MOREX.r2.5HG0371880,HORVU.MOREX.r2.5HG0419720,HORVU.MOREX.r2.5HG0368520,HORVU.MOREX.r2.5HG0398020,HORVU.MOREX.r2.1HG0058370,HORVU.MOREX.r2.5HG0387710,HORVU.MOREX.r2.5HG0375000,HORVU.MOREX.r2.5HG0376480,HORVU.MOREX.r2.5HG0375480,HORVU.MOREX.r2.5HG0423550,HORVU.MOREX.r2.7HG0535010,HORVU.MOREX.r2.5HG0379850,HORVU.MOREX.r2.5HG0381700,HORVU.MOREX.r2.5HG0376600,HORVU.MOREX.r2.1HG0011100,HORVU.MOR…	0.233215	0.728683	0.277445
175	34	72	0	19	13	HORVU.MOREX.r2.6HG0502370,HORVU.MOREX.r2.1HG0076680,HORVU.MOREX.r2.4HG0295370,HORVU.MOREX.r2.6HG0502880,HORVU.MOREX.r2.1HG0001030,HORVU.MOREX.r2.4HG0290700,HORVU.MOREX.r2.1HG0003070,HORVU.MOREX.r2.6HG0503330,HORVU.MOREX.r2.4HG0287600,HORVU.MOREX.r2.4HG0287760,HORVU.MOREX.r2.4HG0288360,HORVU.MOREX.r2.4HG0291490,HORVU.MOREX.r2.1HG0076850,HORVU.MOREX.r2.1HG0003500,HORVU.MOREX.r2.4HG0288290,HORVU.MOR…	HORVU.MOREX.r2.6HG0502220,HORVU.MOREX.r2.1HG0023130,HORVU.MOREX.r2.3HG0260640,HORVU.MOREX.r2.4HG0327430,HORVU.MOREX.r2.3HG0260740,HORVU.MOREX.r2.6HG0502590,HORVU.MOREX.r2.4HG0331060,HORVU.MOREX.r2.2HG0160580,HORVU.MOREX.r2.2HG0160590,HORVU.MOREX.r2.4HG0288260,HORVU.MOREX.r2.6HG0503070,HORVU.MOREX.r2.1HG0076500,HORVU.MOREX.r2.3HG0226490	HORVU.MOREX.r2.1HG0055640,HORVU.MOREX.r2.1HG0056600,HORVU.MOREX.r2.4HG0277580,HORVU.MOREX.r2.4HG0327430,HORVU.MOREX.r2.4HG0288260,HORVU.MOREX.r2.6HG0503070,HORVU.MOREX.r2.4HG0295800,HORVU.MOREX.r2.1HG0075170,HORVU.MOREX.r2.7HG0624100,HORVU.MOREX.r2.2HG0135600,HORVU.MOREX.r2.3HG0197140,HORVU.MOREX.r2.1HG0023130,HORVU.MOREX.r2.4HG0331060,HORVU.MOREX.r2.2HG0160580,HORVU.MOREX.r2.2HG0116450,HORVU.MOR…	0.234916	0.653836	0.277872
176	50	132	0	23	20	HORVU.MOREX.r2.6HG0448750,HORVU.MOREX.r2.6HG0451050,HORVU.MOREX.r2.6HG0458560,HORVU.MOREX.r2.6HG0458440,HORVU.MOREX.r2.6HG0451070,HORVU.MOREX.r2.1HG0005040,HORVU.MOREX.r2.6HG0458540,HORVU.MOREX.r2.6HG0459250,HORVU.MOREX.r2.6HG0450740,HORVU.MOREX.r2.6HG0453820,HORVU.MOREX.r2.6HG0448980,HORVU.MOREX.r2.6HG0453740,HORVU.MOREX.r2.6HG0451570,HORVU.MOREX.r2.1HG0003500,HORVU.MOREX.r2.1HG0003400,HORVU.MOR…	HORVU.MOREX.r2.6HG0449790,HORVU.MOREX.r2.6HG0454020,HORVU.MOREX.r2.6HG0455850,HORVU.MOREX.r2.2HG0173140,HORVU.MOREX.r2.6HG0447900,HORVU.MOREX.r2.6HG0447910,HORVU.MOREX.r2.6HG0452610,HORVU.MOREX.r2.UnG0633820,HORVU.MOREX.r2.6HG0453800,HORVU.MOREX.r2.2HG0145180,HORVU.MOREX.r2.6HG0459420,HORVU.MOREX.r2.6HG0447990,HORVU.MOREX.r2.6HG0458450,HORVU.MOREX.r2.6HG0454310,HORVU.MOREX.r2.6HG0450830,HORVU.MOR…	HORVU.MOREX.r2.4HG0304790,HORVU.MOREX.r2.6HG0447910,HORVU.MOREX.r2.6HG0459420,HORVU.MOREX.r2.6HG0447990,HORVU.MOREX.r2.6HG0447890,HORVU.MOREX.r2.2HG0145180,HORVU.MOREX.r2.6HG0454020,HORVU.MOREX.r2.7HG0596560,HORVU.MOREX.r2.6HG0448410,HORVU.MOREX.r2.6HG0453800,HORVU.MOREX.r2.5HG0383970,HORVU.MOREX.r2.6HG0450830,HORVU.MOREX.r2.6HG0455850,HORVU.MOREX.r2.6HG0447900,HORVU.MOREX.r2.UnG0633820,HORVU.MOR…	0.257127	0.703906	0.302417
177	39	60	0	38	15	HORVU.MOREX.r2.2HG0106820,HORVU.MOREX.r2.7HG0533530,HORVU.MOREX.r2.5HG0438470,HORVU.MOREX.r2.7HG0531920,HORVU.MOREX.r2.5HG0439100,HORVU.MOREX.r2.7HG0604200,HORVU.MOREX.r2.1HG0003750,HORVU.MOREX.r2.5HG0439240,HORVU.MOREX.r2.1HG0003500,HORVU.MOREX.r2.4HG0341020,HORVU.MOREX.r2.1HG0064450,HORVU.MOREX.r2.2HG0099970,HORVU.MOREX.r2.1HG0003400,HORVU.MOREX.r2.5HG0440460,HORVU.MOREX.r2.3HG0240080,HORVU.MOR…	HORVU.MOREX.r2.7HG0563540,HORVU.MOREX.r2.7HG0528470,HORVU.MOREX.r2.5HG0440410,HORVU.MOREX.r2.3HG0209630,HORVU.MOREX.r2.2HG0125770,HORVU.MOREX.r2.5HG0440210,HORVU.MOREX.r2.7HG0603840,HORVU.MOREX.r2.7HG0531800,HORVU.MOREX.r2.5HG0429370,HORVU.MOREX.r2.7HG0618650,HORVU.MOREX.r2.1HG0064690,HORVU.MOREX.r2.5HG0435900,HORVU.MOREX.r2.2HG0100160,HORVU.MOREX.r2.5HG0438710,HORVU.MOREX.r2.4HG0295190	HORVU.MOREX.r2.5HG0429370,HORVU.MOREX.r2.5HG0440210,HORVU.MOREX.r2.3HG0227500,HORVU.MOREX.r2.2HG0155170,HORVU.MOREX.r2.7HG0531800,HORVU.MOREX.r2.7HG0563540,HORVU.MOREX.r2.2HG0102950,HORVU.MOREX.r2.4HG0295190,HORVU.MOREX.r2.6HG0508800,HORVU.MOREX.r2.3HG0209630,HORVU.MOREX.r2.1HG0013190,HORVU.MOREX.r2.2HG0108340,HORVU.MOREX.r2.2HG0151290,HORVU.MOREX.r2.2HG0156780,HORVU.MOREX.r2.5HG0438710,HORVU.MOR…	0.261033	0.660006	0.305276
178	29	45	0	22	11	HORVU.MOREX.r2.4HG0291260,HORVU.MOREX.r2.1HG0078200,HORVU.MOREX.r2.1HG0078540,HORVU.MOREX.r2.1HG0001710,HORVU.MOREX.r2.1HG0002560,HORVU.MOREX.r2.4HG0342100,HORVU.MOREX.r2.4HG0341690,HORVU.MOREX.r2.1HG0003500,HORVU.MOREX.r2.1HG0078050,HORVU.MOREX.r2.1HG0003400,HORVU.MOREX.r2.4HG0341600,HORVU.MOREX.r2.4HG0342570,HORVU.MOREX.r2.1HG0078680,HORVU.MOREX.r2.4HG0343120,HORVU.MOREX.r2.1HG0078550,HORVU.MOR…	HORVU.MOREX.r2.4HG0341420,HORVU.MOREX.r2.4HG0342320,HORVU.MOREX.r2.4HG0342150,HORVU.MOREX.r2.1HG0043060,HORVU.MOREX.r2.3HG0241080,HORVU.MOREX.r2.5HG0373560,HORVU.MOREX.r2.4HG0341570,HORVU.MOREX.r2.4HG0342560,HORVU.MOREX.r2.4HG0341440,HORVU.MOREX.r2.1HG0074180,HORVU.MOREX.r2.7HG0581320	HORVU.MOREX.r2.6HG0456150,HORVU.MOREX.r2.5HG0405990,HORVU.MOREX.r2.3HG0241080,HORVU.MOREX.r2.4HG0342320,HORVU.MOREX.r2.4HG0334490,HORVU.MOREX.r2.1HG0043060,HORVU.MOREX.r2.4HG0342150,HORVU.MOREX.r2.4HG0341420,HORVU.MOREX.r2.5HG0373560,HORVU.MOREX.r2.4HG0341570,HORVU.MOREX.r2.1HG0032070,HORVU.MOREX.r2.3HG0188200,HORVU.MOREX.r2.2HG0103920,HORVU.MOREX.r2.7HG0571840,HORVU.MOREX.r2.4HG0342560,HORVU.MOR…	0.269695	0.645567	0.311882
179	29	46	0	20	11	HORVU.MOREX.r2.2HG0164520,HORVU.MOREX.r2.5HG0407090,HORVU.MOREX.r2.5HG0406980,HORVU.MOREX.r2.1HG0003400,HORVU.MOREX.r2.5HG0406340,HORVU.MOREX.r2.5HG0407160,HORVU.MOREX.r2.5HG0404560,HORVU.MOREX.r2.1HG0003070,HORVU.MOREX.r2.5HG0408240,HORVU.MOREX.r2.2HG0164090,HORVU.MOREX.r2.5HG0407580,HORVU.MOREX.r2.5HG0407940,HORVU.MOREX.r2.1HG0003500,HORVU.MOREX.r2.2HG0163880,HORVU.MOREX.r2.2HG0165430,HORVU.MOR…	HORVU.MOREX.r2.5HG0405770,HORVU.MOREX.r2.5HG0406710,HORVU.MOREX.r2.2HG0164160,HORVU.MOREX.r2.2HG0142550,HORVU.MOREX.r2.5HG0407840,HORVU.MOREX.r2.5HG0407460,HORVU.MOREX.r2.5HG0407540,HORVU.MOREX.r2.5HG0405940,HORVU.MOREX.r2.5HG0407200,HORVU.MOREX.r2.5HG0407500,HORVU.MOREX.r2.5HG0404430	HORVU.MOREX.r2.5HG0405770,HORVU.MOREX.r2.5HG0406710,HORVU.MOREX.r2.2HG0164160,HORVU.MOREX.r2.2HG0175590,HORVU.MOREX.r2.7HG0582270,HORVU.MOREX.r2.5HG0402420,HORVU.MOREX.r2.2HG0142550,HORVU.MOREX.r2.3HG0221540,HORVU.MOREX.r2.5HG0407840,HORVU.MOREX.r2.4HG0322260,HORVU.MOREX.r2.5HG0407460,HORVU.MOREX.r2.5HG0407540,HORVU.MOREX.r2.2HG0147070,HORVU.MOREX.r2.5HG0405940,HORVU.MOREX.r2.5HG0407200,HORVU.MOR…	0.269695	0.645567	0.311882
180	43	120	0	20	17	HORVU.MOREX.r2.5HG0442600,HORVU.MOREX.r2.5HG0438210,HORVU.MOREX.r2.5HG0443190,HORVU.MOREX.r2.5HG0442820,HORVU.MOREX.r2.5HG0437790,HORVU.MOREX.r2.5HG0443280,HORVU.MOREX.r2.5HG0443070,HORVU.MOREX.r2.5HG0443060,HORVU.MOREX.r2.1HG0003070,HORVU.MOREX.r2.5HG0442970,HORVU.MOREX.r2.1HG0003400,HORVU.MOREX.r2.3HG0274770,HORVU.MOREX.r2.5HG0442930,HORVU.MOREX.r2.3HG0274800,HORVU.MOREX.r2.1HG0003500,HORVU.MOR…	HORVU.MOREX.r2.5HG0437960,HORVU.MOREX.r2.3HG0274880,HORVU.MOREX.r2.5HG0438240,HORVU.MOREX.r2.5HG0443570,HORVU.MOREX.r2.5HG0438220,HORVU.MOREX.r2.UnG0626970,HORVU.MOREX.r2.3HG0275510,HORVU.MOREX.r2.5HG0436910,HORVU.MOREX.r2.3HG0274890,HORVU.MOREX.r2.5HG0437630,HORVU.MOREX.r2.3HG0274950,HORVU.MOREX.r2.UnG0626940,HORVU.MOREX.r2.5HG0436710,HORVU.MOREX.r2.5HG0437290,HORVU.MOREX.r2.5HG0433930,HORVU.MOR…	HORVU.MOREX.r2.5HG0437960,HORVU.MOREX.r2.5HG0443570,HORVU.MOREX.r2.5HG0436910,HORVU.MOREX.r2.5HG0437630,HORVU.MOREX.r2.5HG0432650,HORVU.MOREX.r2.5HG0442380,HORVU.MOREX.r2.5HG0438220,HORVU.MOREX.r2.3HG0274890,HORVU.MOREX.r2.4HG0335590,HORVU.MOREX.r2.5HG0436710,HORVU.MOREX.r2.5HG0437290,HORVU.MOREX.r2.1HG0035540,HORVU.MOREX.r2.2HG0138840,HORVU.MOREX.r2.3HG0275510,HORVU.MOREX.r2.1HG0066380,HORVU.MOR…	0.284676	0.690483	0.327378
181	23	52	0	16	14	HORVU.MOREX.r2.3HG0241490,HORVU.MOREX.r2.7HG0615210,HORVU.MOREX.r2.4HG0335240,HORVU.MOREX.r2.3HG0235250,HORVU.MOREX.r2.3HG0241720,HORVU.MOREX.r2.4HG0334770,HORVU.MOREX.r2.1HG0003750,HORVU.MOREX.r2.1HG0003070,HORVU.MOREX.r2.4HG0286540,HORVU.MOREX.r2.3HG0234880,HORVU.MOREX.r2.3HG0241420,HORVU.MOREX.r2.3HG0241540,HORVU.MOREX.r2.1HG0003500,HORVU.MOREX.r2.3HG0234750,HORVU.MOREX.r2.1HG0003400,HORVU.MOR…	HORVU.MOREX.r2.3HG0241740,HORVU.MOREX.r2.3HG0235440,HORVU.MOREX.r2.3HG0241790,HORVU.MOREX.r2.4HG0279480,HORVU.MOREX.r2.3HG0233980,HORVU.MOREX.r2.3HG0245700,HORVU.MOREX.r2.3HG0204940,HORVU.MOREX.r2.3HG0239630,HORVU.MOREX.r2.3HG0255360,HORVU.MOREX.r2.3HG0235170,HORVU.MOREX.r2.2HG0096310,HORVU.MOREX.r2.7HG0618110,HORVU.MOREX.r2.3HG0261040,HORVU.MOREX.r2.3HG0239620	HORVU.MOREX.r2.3HG0241740,HORVU.MOREX.r2.3HG0235440,HORVU.MOREX.r2.3HG0241790,HORVU.MOREX.r2.4HG0279480,HORVU.MOREX.r2.3HG0233980,HORVU.MOREX.r2.3HG0245700,HORVU.MOREX.r2.3HG0255360,HORVU.MOREX.r2.7HG0618110,HORVU.MOREX.r2.6HG0451580,HORVU.MOREX.r2.5HG0411320,HORVU.MOREX.r2.3HG0239620,HORVU.MOREX.r2.3HG0235170,HORVU.MOREX.r2.2HG0096310,HORVU.MOREX.r2.3HG0204940,HORVU.MOREX.r2.3HG0261040,HORVU.MOR…	0.297508	1.64723	0.340245
182	49	195	0	27	20	HORVU.MOREX.r2.4HG0276810,HORVU.MOREX.r2.4HG0276030,HORVU.MOREX.r2.2HG0085190,HORVU.MOREX.r2.4HG0276340,HORVU.MOREX.r2.4HG0276080,HORVU.MOREX.r2.6HG0450200,HORVU.MOREX.r2.6HG0449560,HORVU.MOREX.r2.2HG0085320,HORVU.MOREX.r2.2HG0084620,HORVU.MOREX.r2.1HG0003500,HORVU.MOREX.r2.4HG0327350,HORVU.MOREX.r2.1HG0003400,HORVU.MOREX.r2.1HG0014470,HORVU.MOREX.r2.6HG0449370,HORVU.MOREX.r2.2HG0085930,HORVU.MOR…	HORVU.MOREX.r2.6HG0463280,HORVU.MOREX.r2.6HG0448700,HORVU.MOREX.r2.6HG0450060,HORVU.MOREX.r2.4HG0275980,HORVU.MOREX.r2.4HG0276650,HORVU.MOREX.r2.1HG0048910,HORVU.MOREX.r2.3HG0259610,HORVU.MOREX.r2.6HG0449390,HORVU.MOREX.r2.7HG0611310,HORVU.MOREX.r2.4HG0276780,HORVU.MOREX.r2.4HG0276830,HORVU.MOREX.r2.2HG0085750,HORVU.MOREX.r2.6HG0449180,HORVU.MOREX.r2.2HG0085370,HORVU.MOREX.r2.4HG0276240,HORVU.MOR…	HORVU.MOREX.r2.4HG0276650,HORVU.MOREX.r2.1HG0048910,HORVU.MOREX.r2.4HG0276780,HORVU.MOREX.r2.4HG0276830,HORVU.MOREX.r2.3HG0221470,HORVU.MOREX.r2.4HG0276700,HORVU.MOREX.r2.2HG0085820,HORVU.MOREX.r2.1HG0078310,HORVU.MOREX.r2.2HG0085750,HORVU.MOREX.r2.7HG0544160,HORVU.MOREX.r2.3HG0259610,HORVU.MOREX.r2.4HG0276820,HORVU.MOREX.r2.4HG0276240,HORVU.MOREX.r2.7HG0529010,HORVU.MOREX.r2.5HG0442120,HORVU.MOR…	0.316691	0.728323	0.358949
183	25	37	0	9	15	HORVU.MOREX.r2.1HG0075930,HORVU.MOREX.r2.1HG0003070,HORVU.MOREX.r2.3HG0253360,HORVU.MOREX.r2.3HG0254040,HORVU.MOREX.r2.3HG0254010,HORVU.MOREX.r2.1HG0003500,HORVU.MOREX.r2.1HG0075910,HORVU.MOREX.r2.3HG0253440,HORVU.MOREX.r2.1HG0003400	HORVU.MOREX.r2.6HG0521040,HORVU.MOREX.r2.3HG0253980,HORVU.MOREX.r2.2HG0093550,HORVU.MOREX.r2.4HG0295460,HORVU.MOREX.r2.3HG0229820,HORVU.MOREX.r2.5HG0357690,HORVU.MOREX.r2.5HG0419260,HORVU.MOREX.r2.5HG0385140,HORVU.MOREX.r2.1HG0076230,HORVU.MOREX.r2.1HG0034310,HORVU.MOREX.r2.2HG0163250,HORVU.MOREX.r2.7HG0566810,HORVU.MOREX.r2.1HG0075250,HORVU.MOREX.r2.4HG0324800,HORVU.MOREX.r2.1HG0075760	HORVU.MOREX.r2.6HG0521040,HORVU.MOREX.r2.2HG0093550,HORVU.MOREX.r2.5HG0357690,HORVU.MOREX.r2.5HG0385140,HORVU.MOREX.r2.3HG0188200,HORVU.MOREX.r2.2HG0163250,HORVU.MOREX.r2.1HG0057810,HORVU.MOREX.r2.4HG0291600,HORVU.MOREX.r2.4HG0295460,HORVU.MOREX.r2.3HG0229820,HORVU.MOREX.r2.5HG0396700,HORVU.MOREX.r2.4HG0330390,HORVU.MOREX.r2.1HG0034310,HORVU.MOREX.r2.2HG0126160,HORVU.MOREX.r2.7HG0566810,HORVU.MOR…	0.317331	1.58842	0.358949
184	29	115	0	11	17	HORVU.MOREX.r2.7HG0553840,HORVU.MOREX.r2.7HG0551080,HORVU.MOREX.r2.7HG0554980,HORVU.MOREX.r2.7HG0554850,HORVU.MOREX.r2.1HG0003070,HORVU.MOREX.r2.7HG0554060,HORVU.MOREX.r2.1HG0003400,HORVU.MOREX.r2.1HG0003500,HORVU.MOREX.r2.7HG0553740,HORVU.MOREX.r2.7HG0552580,HORVU.MOREX.r2.7HG0552160	HORVU.MOREX.r2.7HG0554080,HORVU.MOREX.r2.7HG0552050,HORVU.MOREX.r2.7HG0556650,HORVU.MOREX.r2.7HG0552550,HORVU.MOREX.r2.7HG0554130,HORVU.MOREX.r2.1HG0013320,HORVU.MOREX.r2.7HG0551140,HORVU.MOREX.r2.7HG0555000,HORVU.MOREX.r2.7HG0553660,HORVU.MOREX.r2.7HG0554110,HORVU.MOREX.r2.7HG0557610,HORVU.MOREX.r2.6HG0491320,HORVU.MOREX.r2.7HG0551130,HORVU.MOREX.r2.7HG0551420,HORVU.MOREX.r2.7HG0551930,HORVU.MOR…	HORVU.MOREX.r2.7HG0554080,HORVU.MOREX.r2.7HG0552050,HORVU.MOREX.r2.7HG0556650,HORVU.MOREX.r2.7HG0552550,HORVU.MOREX.r2.7HG0554130,HORVU.MOREX.r2.1HG0045500,HORVU.MOREX.r2.1HG0013320,HORVU.MOREX.r2.2HG0147100,HORVU.MOREX.r2.7HG0555000,HORVU.MOREX.r2.7HG0551140,HORVU.MOREX.r2.7HG0553660,HORVU.MOREX.r2.7HG0554110,HORVU.MOREX.r2.7HG0557610,HORVU.MOREX.r2.6HG0491320,HORVU.MOREX.r2.7HG0551130,HORVU.MOR…	0.352734	1.50021	0.396826
185	63	216	0	42	27	HORVU.MOREX.r2.6HG0494310,HORVU.MOREX.r2.6HG0494580,HORVU.MOREX.r2.2HG0102050,HORVU.MOREX.r2.2HG0101490,HORVU.MOREX.r2.7HG0615630,HORVU.MOREX.r2.6HG0495400,HORVU.MOREX.r2.7HG0617840,HORVU.MOREX.r2.7HG0617000,HORVU.MOREX.r2.2HG0101040,HORVU.MOREX.r2.2HG0101000,HORVU.MOREX.r2.6HG0495440,HORVU.MOREX.r2.7HG0616150,HORVU.MOREX.r2.7HG0618830,HORVU.MOREX.r2.7HG0618210,HORVU.MOREX.r2.6HG0493050,HORVU.MOR…	HORVU.MOREX.r2.6HG0479240,HORVU.MOREX.r2.6HG0482540,HORVU.MOREX.r2.6HG0481830,HORVU.MOREX.r2.3HG0206040,HORVU.MOREX.r2.2HG0114130,HORVU.MOREX.r2.3HG0246350,HORVU.MOREX.r2.6HG0490130,HORVU.MOREX.r2.7HG0599320,HORVU.MOREX.r2.6HG0453510,HORVU.MOREX.r2.6HG0491730,HORVU.MOREX.r2.3HG0233380,HORVU.MOREX.r2.6HG0493110,HORVU.MOREX.r2.6HG0494680,HORVU.MOREX.r2.6HG0493150,HORVU.MOREX.r2.4HG0346930,HORVU.MOR…	HORVU.MOREX.r2.6HG0479240,HORVU.MOREX.r2.6HG0448690,HORVU.MOREX.r2.6HG0482540,HORVU.MOREX.r2.6HG0481830,HORVU.MOREX.r2.3HG0206040,HORVU.MOREX.r2.6HG0492720,HORVU.MOREX.r2.3HG0246350,HORVU.MOREX.r2.6HG0490130,HORVU.MOREX.r2.7HG0599320,HORVU.MOREX.r2.6HG0453510,HORVU.MOREX.r2.6HG0491730,HORVU.MOREX.r2.3HG0233380,HORVU.MOREX.r2.6HG0493110,HORVU.MOREX.r2.6HG0502280,HORVU.MOREX.r2.2HG0100610,HORVU.MOR…	0.378602	0.792114	0.423624
186	32	134	0	8	13	HORVU.MOREX.r2.2HG0150540,HORVU.MOREX.r2.2HG0109440,HORVU.MOREX.r2.1HG0003070,HORVU.MOREX.r2.1HG0003500,HORVU.MOREX.r2.2HG0114200,HORVU.MOREX.r2.2HG0110620,HORVU.MOREX.r2.2HG0110160,HORVU.MOREX.r2.1HG0003400	HORVU.MOREX.r2.2HG0107860,HORVU.MOREX.r2.2HG0114750,HORVU.MOREX.r2.2HG0118810,HORVU.MOREX.r2.2HG0160720,HORVU.MOREX.r2.2HG0098800,HORVU.MOREX.r2.2HG0116360,HORVU.MOREX.r2.7HG0582390,HORVU.MOREX.r2.2HG0107450,HORVU.MOREX.r2.6HG0494390,HORVU.MOREX.r2.2HG0102940,HORVU.MOREX.r2.4HG0279190,HORVU.MOREX.r2.2HG0114740,HORVU.MOREX.r2.6HG0494420	HORVU.MOREX.r2.2HG0107860,HORVU.MOREX.r2.2HG0114750,HORVU.MOREX.r2.3HG0185770,HORVU.MOREX.r2.2HG0160720,HORVU.MOREX.r2.2HG0098800,HORVU.MOREX.r2.1HG0018440,HORVU.MOREX.r2.2HG0114740,HORVU.MOREX.r2.7HG0582390,HORVU.MOREX.r2.2HG0107450,HORVU.MOREX.r2.4HG0336270,HORVU.MOREX.r2.6HG0494390,HORVU.MOREX.r2.1HG0070690,HORVU.MOREX.r2.2HG0102940,HORVU.MOREX.r2.4HG0279190,HORVU.MOREX.r2.2HG0118810,HORVU.MOR…	0.382343	0.722948	0.425511
187	39	276	0	25	16	HORVU.MOREX.r2.5HG0433720,HORVU.MOREX.r2.5HG0434780,HORVU.MOREX.r2.5HG0434130,HORVU.MOREX.r2.5HG0432060,HORVU.MOREX.r2.5HG0434820,HORVU.MOREX.r2.5HG0435040,HORVU.MOREX.r2.5HG0432200,HORVU.MOREX.r2.5HG0432020,HORVU.MOREX.r2.5HG0434680,HORVU.MOREX.r2.1HG0003500,HORVU.MOREX.r2.5HG0434260,HORVU.MOREX.r2.5HG0434150,HORVU.MOREX.r2.5HG0433840,HORVU.MOREX.r2.5HG0434380,HORVU.MOREX.r2.1HG0003400,HORVU.MOR…	HORVU.MOREX.r2.5HG0435220,HORVU.MOREX.r2.5HG0433560,HORVU.MOREX.r2.5HG0438880,HORVU.MOREX.r2.5HG0432010,HORVU.MOREX.r2.6HG0492640,HORVU.MOREX.r2.5HG0436190,HORVU.MOREX.r2.5HG0434910,HORVU.MOREX.r2.5HG0434860,HORVU.MOREX.r2.5HG0431750,HORVU.MOREX.r2.5HG0434160,HORVU.MOREX.r2.5HG0434830,HORVU.MOREX.r2.5HG0427270,HORVU.MOREX.r2.5HG0438540,HORVU.MOREX.r2.UnG0633100,HORVU.MOREX.r2.7HG0612390,HORVU.MOR…	HORVU.MOREX.r2.5HG0435220,HORVU.MOREX.r2.5HG0433560,HORVU.MOREX.r2.5HG0438880,HORVU.MOREX.r2.6HG0470600,HORVU.MOREX.r2.5HG0432010,HORVU.MOREX.r2.6HG0492640,HORVU.MOREX.r2.7HG0618510,HORVU.MOREX.r2.5HG0434910,HORVU.MOREX.r2.5HG0434860,HORVU.MOREX.r2.5HG0431750,HORVU.MOREX.r2.5HG0434160,HORVU.MOREX.r2.5HG0434830,HORVU.MOREX.r2.5HG0427270,HORVU.MOREX.r2.5HG0438540,HORVU.MOREX.r2.UnG0633100,HORVU.MOR…	0.422699	0.734916	0.467908
188	20	19	0	6	8	HORVU.MOREX.r2.1HG0003070,HORVU.MOREX.r2.3HG0253700,HORVU.MOREX.r2.1HG0003500,HORVU.MOREX.r2.3HG0253590,HORVU.MOREX.r2.1HG0003400,HORVU.MOREX.r2.3HG0254820	HORVU.MOREX.r2.3HG0254210,HORVU.MOREX.r2.5HG0389750,HORVU.MOREX.r2.3HG0253690,HORVU.MOREX.r2.3HG0254770,HORVU.MOREX.r2.6HG0458320,HORVU.MOREX.r2.3HG0254780,HORVU.MOREX.r2.3HG0254800,HORVU.MOREX.r2.3HG0254310	HORVU.MOREX.r2.1HG0041260,HORVU.MOREX.r2.3HG0254210,HORVU.MOREX.r2.5HG0389750,HORVU.MOREX.r2.3HG0254770,HORVU.MOREX.r2.7HG0562660,HORVU.MOREX.r2.5HG0386860,HORVU.MOREX.r2.6HG0458320,HORVU.MOREX.r2.7HG0583940,HORVU.MOREX.r2.3HG0254780,HORVU.MOREX.r2.3HG0253690,HORVU.MOREX.r2.1HG0028770,HORVU.MOREX.r2.3HG0254310,HORVU.MOREX.r2.6HG0489660,HORVU.MOREX.r2.3HG0254800,HORVU.MOREX.r2.7HG0587290	0.506405	0.70465	0.553669
189	20	16	0	25	8	HORVU.MOREX.r2.5HG0398040,HORVU.MOREX.r2.5HG0397220,HORVU.MOREX.r2.5HG0398060,HORVU.MOREX.r2.4HG0291260,HORVU.MOREX.r2.1HG0001710,HORVU.MOREX.r2.1HG0002560,HORVU.MOREX.r2.5HG0396840,HORVU.MOREX.r2.1HG0003750,HORVU.MOREX.r2.1HG0001030,HORVU.MOREX.r2.5HG0396550,HORVU.MOREX.r2.1HG0003500,HORVU.MOREX.r2.5HG0394700,HORVU.MOREX.r2.5HG0396910,HORVU.MOREX.r2.5HG0393770,HORVU.MOREX.r2.1HG0003400,HORVU.MOR…	HORVU.MOREX.r2.5HG0446280,HORVU.MOREX.r2.2HG0160340,HORVU.MOREX.r2.4HG0315350,HORVU.MOREX.r2.5HG0371220,HORVU.MOREX.r2.2HG0112010,HORVU.MOREX.r2.1HG0059720,HORVU.MOREX.r2.5HG0397790,HORVU.MOREX.r2.1HG0057120	HORVU.MOREX.r2.6HG0505070,HORVU.MOREX.r2.5HG0446280,HORVU.MOREX.r2.6HG0523470,HORVU.MOREX.r2.7HG0561040,HORVU.MOREX.r2.5HG0400910,HORVU.MOREX.r2.2HG0160340,HORVU.MOREX.r2.4HG0315350,HORVU.MOREX.r2.5HG0371220,HORVU.MOREX.r2.2HG0112010,HORVU.MOREX.r2.1HG0059720,HORVU.MOREX.r2.7HG0599860,HORVU.MOREX.r2.4HG0276070,HORVU.MOREX.r2.6HG0454930,HORVU.MOREX.r2.3HG0184170,HORVU.MOREX.r2.5HG0397790,HORVU.MOR…	0.506405	0.70465	0.553669
190	57	145	0	18	25	HORVU.MOREX.r2.7HG0618830,HORVU.MOREX.r2.6HG0463100,HORVU.MOREX.r2.7HG0618210,HORVU.MOREX.r2.7HG0618390,HORVU.MOREX.r2.2HG0170020,HORVU.MOREX.r2.1HG0003070,HORVU.MOREX.r2.7HG0567710,HORVU.MOREX.r2.2HG0170590,HORVU.MOREX.r2.7HG0617840,HORVU.MOREX.r2.7HG0618130,HORVU.MOREX.r2.1HG0003500,HORVU.MOREX.r2.2HG0171080,HORVU.MOREX.r2.2HG0170870,HORVU.MOREX.r2.7HG0566960,HORVU.MOREX.r2.1HG0078080,HORVU.MOR…	HORVU.MOREX.r2.7HG0616560,HORVU.MOREX.r2.6HG0461810,HORVU.MOREX.r2.2HG0169280,HORVU.MOREX.r2.2HG0135150,HORVU.MOREX.r2.6HG0461240,HORVU.MOREX.r2.7HG0618380,HORVU.MOREX.r2.2HG0170860,HORVU.MOREX.r2.6HG0460800,HORVU.MOREX.r2.7HG0566770,HORVU.MOREX.r2.7HG0561220,HORVU.MOREX.r2.5HG0379890,HORVU.MOREX.r2.7HG0618480,HORVU.MOREX.r2.6HG0463090,HORVU.MOREX.r2.1HG0049170,HORVU.MOREX.r2.7HG0581720,HORVU.MOR…	HORVU.MOREX.r2.7HG0616560,HORVU.MOREX.r2.6HG0461810,HORVU.MOREX.r2.2HG0169280,HORVU.MOREX.r2.2HG0135150,HORVU.MOREX.r2.6HG0461240,HORVU.MOREX.r2.1HG0066050,HORVU.MOREX.r2.2HG0154600,HORVU.MOREX.r2.6HG0511170,HORVU.MOREX.r2.7HG0618380,HORVU.MOREX.r2.2HG0170860,HORVU.MOREX.r2.2HG0132470,HORVU.MOREX.r2.6HG0460800,HORVU.MOREX.r2.2HG0139900,HORVU.MOREX.r2.7HG0561220,HORVU.MOREX.r2.5HG0379890,HORVU.MOR…	0.508198	0.825428	0.553669
191	23	98	0	10	13	HORVU.MOREX.r2.7HG0561540,HORVU.MOREX.r2.1HG0054840,HORVU.MOREX.r2.1HG0055890,HORVU.MOREX.r2.1HG0055180,HORVU.MOREX.r2.7HG0561480,HORVU.MOREX.r2.1HG0056110,HORVU.MOREX.r2.1HG0054330,HORVU.MOREX.r2.1HG0055410,HORVU.MOREX.r2.7HG0561270,HORVU.MOREX.r2.1HG0054820	HORVU.MOREX.r2.1HG0054900,HORVU.MOREX.r2.1HG0038140,HORVU.MOREX.r2.1HG0052930,HORVU.MOREX.r2.1HG0049880,HORVU.MOREX.r2.7HG0590840,HORVU.MOREX.r2.7HG0574400,HORVU.MOREX.r2.1HG0054880,HORVU.MOREX.r2.1HG0055450,HORVU.MOREX.r2.1HG0054060,HORVU.MOREX.r2.2HG0158430,HORVU.MOREX.r2.1HG0053790,HORVU.MOREX.r2.7HG0561500,HORVU.MOREX.r2.1HG0053910	HORVU.MOREX.r2.1HG0054900,HORVU.MOREX.r2.1HG0038140,HORVU.MOREX.r2.1HG0052930,HORVU.MOREX.r2.1HG0049880,HORVU.MOREX.r2.7HG0590840,HORVU.MOREX.r2.7HG0574400,HORVU.MOREX.r2.1HG0054880,HORVU.MOREX.r2.1HG0055450,HORVU.MOREX.r2.1HG0054060,HORVU.MOREX.r2.2HG0158430,HORVU.MOREX.r2.1HG0053790,HORVU.MOREX.r2.7HG0561500,HORVU.MOREX.r2.1HG0053910	0.532914	1.37605	0.577556
192	42	150	0	31	18	HORVU.MOREX.r2.5HG0426980,HORVU.MOREX.r2.5HG0426010,HORVU.MOREX.r2.7HG0589750,HORVU.MOREX.r2.5HG0426940,HORVU.MOREX.r2.5HG0422560,HORVU.MOREX.r2.5HG0422650,HORVU.MOREX.r2.7HG0591580,HORVU.MOREX.r2.7HG0590580,HORVU.MOREX.r2.7HG0591410,HORVU.MOREX.r2.5HG0426050,HORVU.MOREX.r2.1HG0003500,HORVU.MOREX.r2.5HG0426270,HORVU.MOREX.r2.7HG0590460,HORVU.MOREX.r2.7HG0585580,HORVU.MOREX.r2.5HG0427700,HORVU.MOR…	HORVU.MOREX.r2.3HG0244820,HORVU.MOREX.r2.5HG0425740,HORVU.MOREX.r2.5HG0423670,HORVU.MOREX.r2.5HG0354360,HORVU.MOREX.r2.5HG0425830,HORVU.MOREX.r2.5HG0426060,HORVU.MOREX.r2.5HG0422230,HORVU.MOREX.r2.5HG0421940,HORVU.MOREX.r2.5HG0426180,HORVU.MOREX.r2.5HG0426370,HORVU.MOREX.r2.5HG0429110,HORVU.MOREX.r2.5HG0425710,HORVU.MOREX.r2.5HG0427180,HORVU.MOREX.r2.7HG0546930,HORVU.MOREX.r2.5HG0426910,HORVU.MOR…	HORVU.MOREX.r2.6HG0517950,HORVU.MOREX.r2.7HG0616770,HORVU.MOREX.r2.5HG0354360,HORVU.MOREX.r2.5HG0426370,HORVU.MOREX.r2.5HG0425710,HORVU.MOREX.r2.5HG0426910,HORVU.MOREX.r2.7HG0537500,HORVU.MOREX.r2.5HG0426960,HORVU.MOREX.r2.4HG0277620,HORVU.MOREX.r2.5HG0423920,HORVU.MOREX.r2.3HG0244820,HORVU.MOREX.r2.5HG0423670,HORVU.MOREX.r2.3HG0181450,HORVU.MOREX.r2.5HG0425740,HORVU.MOREX.r2.5HG0429110,HORVU.MOR…	0.536781	0.792506	0.578717
193	46	98	0	16	20	HORVU.MOREX.r2.3HG0187530,HORVU.MOREX.r2.3HG0182360,HORVU.MOREX.r2.3HG0182040,HORVU.MOREX.r2.3HG0184030,HORVU.MOREX.r2.1HG0003070,HORVU.MOREX.r2.3HG0187650,HORVU.MOREX.r2.3HG0181630,HORVU.MOREX.r2.3HG0183050,HORVU.MOREX.r2.1HG0003500,HORVU.MOREX.r2.3HG0187370,HORVU.MOREX.r2.3HG0183340,HORVU.MOREX.r2.3HG0183880,HORVU.MOREX.r2.3HG0181430,HORVU.MOREX.r2.3HG0181420,HORVU.MOREX.r2.1HG0003400,HORVU.MOR…	HORVU.MOREX.r2.6HG0506610,HORVU.MOREX.r2.3HG0182500,HORVU.MOREX.r2.3HG0188960,HORVU.MOREX.r2.3HG0181570,HORVU.MOREX.r2.3HG0181760,HORVU.MOREX.r2.3HG0185600,HORVU.MOREX.r2.3HG0184480,HORVU.MOREX.r2.3HG0182140,HORVU.MOREX.r2.3HG0183840,HORVU.MOREX.r2.3HG0181930,HORVU.MOREX.r2.3HG0182170,HORVU.MOREX.r2.3HG0183440,HORVU.MOREX.r2.3HG0183490,HORVU.MOREX.r2.3HG0181710,HORVU.MOREX.r2.3HG0183680,HORVU.MOR…	HORVU.MOREX.r2.1HG0025060,HORVU.MOREX.r2.3HG0181930,HORVU.MOREX.r2.3HG0182460,HORVU.MOREX.r2.1HG0036120,HORVU.MOREX.r2.5HG0443800,HORVU.MOREX.r2.3HG0181570,HORVU.MOREX.r2.3HG0181760,HORVU.MOREX.r2.3HG0184480,HORVU.MOREX.r2.3HG0182140,HORVU.MOREX.r2.3HG0183840,HORVU.MOREX.r2.4HG0293090,HORVU.MOREX.r2.3HG0183440,HORVU.MOREX.r2.1HG0002190,HORVU.MOREX.r2.3HG0183680,HORVU.MOREX.r2.5HG0441250,HORVU.MOR…	0.555171	0.812845	0.595442
194	34	186	0	5	15	HORVU.MOREX.r2.1HG0003070,HORVU.MOREX.r2.1HG0001030,HORVU.MOREX.r2.1HG0003500,HORVU.MOREX.r2.1HG0003400,HORVU.MOREX.r2.1HG0004200	HORVU.MOREX.r2.5HG0360110,HORVU.MOREX.r2.1HG0001690,HORVU.MOREX.r2.4HG0340100,HORVU.MOREX.r2.7HG0609910,HORVU.MOREX.r2.5HG0422780,HORVU.MOREX.r2.2HG0176090,HORVU.MOREX.r2.4HG0295460,HORVU.MOREX.r2.6HG0522850,HORVU.MOREX.r2.5HG0423400,HORVU.MOREX.r2.6HG0511490,HORVU.MOREX.r2.5HG0360080,HORVU.MOREX.r2.3HG0206810,HORVU.MOREX.r2.1HG0023530,HORVU.MOREX.r2.2HG0140540,HORVU.MOREX.r2.5HG0432000	HORVU.MOREX.r2.5HG0360110,HORVU.MOREX.r2.7HG0609910,HORVU.MOREX.r2.2HG0176090,HORVU.MOREX.r2.3HG0238900,HORVU.MOREX.r2.5HG0432000,HORVU.MOREX.r2.4HG0287800,HORVU.MOREX.r2.6HG0526270,HORVU.MOREX.r2.5HG0422820,HORVU.MOREX.r2.5HG0422780,HORVU.MOREX.r2.4HG0295460,HORVU.MOREX.r2.6HG0522850,HORVU.MOREX.r2.6HG0511490,HORVU.MOREX.r2.3HG0206810,HORVU.MOREX.r2.2HG0140540,HORVU.MOREX.r2.6HG0469440,HORVU.MOR…	0.611803	0.83452	0.6528
195	38	115	0	15	20	HORVU.MOREX.r2.5HG0447180,HORVU.MOREX.r2.5HG0444130,HORVU.MOREX.r2.5HG0447510,HORVU.MOREX.r2.5HG0445740,HORVU.MOREX.r2.1HG0003070,HORVU.MOREX.r2.5HG0446070,HORVU.MOREX.r2.5HG0444620,HORVU.MOREX.r2.1HG0003400,HORVU.MOREX.r2.5HG0444800,HORVU.MOREX.r2.5HG0446980,HORVU.MOREX.r2.5HG0444970,HORVU.MOREX.r2.5HG0444790,HORVU.MOREX.r2.1HG0003500,HORVU.MOREX.r2.5HG0444160,HORVU.MOREX.r2.5HG0446780	HORVU.MOREX.r2.5HG0447830,HORVU.MOREX.r2.5HG0446090,HORVU.MOREX.r2.5HG0445570,HORVU.MOREX.r2.5HG0447770,HORVU.MOREX.r2.5HG0443720,HORVU.MOREX.r2.5HG0447090,HORVU.MOREX.r2.2HG0109990,HORVU.MOREX.r2.5HG0444860,HORVU.MOREX.r2.5HG0444120,HORVU.MOREX.r2.5HG0447690,HORVU.MOREX.r2.3HG0200290,HORVU.MOREX.r2.5HG0444690,HORVU.MOREX.r2.5HG0444880,HORVU.MOREX.r2.5HG0446700,HORVU.MOREX.r2.5HG0447780,HORVU.MOR…	HORVU.MOREX.r2.5HG0385760,HORVU.MOREX.r2.5HG0444120,HORVU.MOREX.r2.5HG0447690,HORVU.MOREX.r2.5HG0446700,HORVU.MOREX.r2.5HG0445880,HORVU.MOREX.r2.5HG0447450,HORVU.MOREX.r2.4HG0337680,HORVU.MOREX.r2.5HG0446090,HORVU.MOREX.r2.2HG0171370,HORVU.MOREX.r2.5HG0443720,HORVU.MOREX.r2.7HG0561730,HORVU.MOREX.r2.3HG0249960,HORVU.MOREX.r2.5HG0447830,HORVU.MOREX.r2.2HG0109990,HORVU.MOREX.r2.5HG0389770,HORVU.MOR…	0.629982	1.17598	0.66875
196	47	289	0	20	21	HORVU.MOREX.r2.5HG0424820,HORVU.MOREX.r2.1HG0064450,HORVU.MOREX.r2.5HG0424830,HORVU.MOREX.r2.5HG0425570,HORVU.MOREX.r2.5HG0424740,HORVU.MOREX.r2.2HG0106820,HORVU.MOREX.r2.1HG0064940,HORVU.MOREX.r2.5HG0423680,HORVU.MOREX.r2.5HG0424570,HORVU.MOREX.r2.5HG0424020,HORVU.MOREX.r2.1HG0003070,HORVU.MOREX.r2.1HG0064460,HORVU.MOREX.r2.5HG0424260,HORVU.MOREX.r2.1HG0003500,HORVU.MOREX.r2.1HG0064120,HORVU.MOR…	HORVU.MOREX.r2.4HG0341530,HORVU.MOREX.r2.5HG0425020,HORVU.MOREX.r2.5HG0354740,HORVU.MOREX.r2.5HG0425460,HORVU.MOREX.r2.5HG0425140,HORVU.MOREX.r2.5HG0382520,HORVU.MOREX.r2.6HG0520070,HORVU.MOREX.r2.5HG0423570,HORVU.MOREX.r2.5HG0423990,HORVU.MOREX.r2.5HG0424310,HORVU.MOREX.r2.5HG0424790,HORVU.MOREX.r2.5HG0424420,HORVU.MOREX.r2.1HG0064000,HORVU.MOREX.r2.4HG0280470,HORVU.MOREX.r2.5HG0425120,HORVU.MOR…	HORVU.MOREX.r2.7HG0528970,HORVU.MOREX.r2.5HG0381800,HORVU.MOREX.r2.UnG0625370,HORVU.MOREX.r2.5HG0425120,HORVU.MOREX.r2.5HG0424360,HORVU.MOREX.r2.5HG0430380,HORVU.MOREX.r2.5HG0425220,HORVU.MOREX.r2.5HG0425610,HORVU.MOREX.r2.6HG0490150,HORVU.MOREX.r2.5HG0423530,HORVU.MOREX.r2.5HG0425020,HORVU.MOREX.r2.5HG0425140,HORVU.MOREX.r2.5HG0423990,HORVU.MOREX.r2.5HG0424310,HORVU.MOREX.r2.1HG0064000,HORVU.MOR…	0.66166	0.853667	0.698794
197	21	37	0	22	9	HORVU.MOREX.r2.3HG0210420,HORVU.MOREX.r2.3HG0209860,HORVU.MOREX.r2.3HG0225790,HORVU.MOREX.r2.3HG0209090,HORVU.MOREX.r2.3HG0232450,HORVU.MOREX.r2.3HG0229390,HORVU.MOREX.r2.1HG0001030,HORVU.MOREX.r2.3HG0226630,HORVU.MOREX.r2.3HG0210560,HORVU.MOREX.r2.1HG0003500,HORVU.MOREX.r2.1HG0003400,HORVU.MOREX.r2.3HG0232290,HORVU.MOREX.r2.3HG0229280,HORVU.MOREX.r2.3HG0222640,HORVU.MOREX.r2.3HG0230880,HORVU.MOR…	HORVU.MOREX.r2.3HG0257390,HORVU.MOREX.r2.6HG0509770,HORVU.MOREX.r2.5HG0368080,HORVU.MOREX.r2.3HG0215170,HORVU.MOREX.r2.3HG0271220,HORVU.MOREX.r2.4HG0284860,HORVU.MOREX.r2.2HG0098530,HORVU.MOREX.r2.2HG0148230,HORVU.MOREX.r2.2HG0138210	HORVU.MOREX.r2.5HG0388870,HORVU.MOREX.r2.4HG0298620,HORVU.MOREX.r2.3HG0257390,HORVU.MOREX.r2.5HG0441730,HORVU.MOREX.r2.6HG0509770,HORVU.MOREX.r2.3HG0241810,HORVU.MOREX.r2.5HG0368080,HORVU.MOREX.r2.4HG0286550,HORVU.MOREX.r2.3HG0215170,HORVU.MOREX.r2.3HG0271220,HORVU.MOREX.r2.4HG0284860,HORVU.MOREX.r2.2HG0098530,HORVU.MOREX.r2.2HG0148230,HORVU.MOREX.r2.5HG0423050,HORVU.MOREX.r2.2HG0138210,HORVU.MOR…	0.665926	0.792898	0.699729
198	25	30	0	19	11	HORVU.MOREX.r2.5HG0432020,HORVU.MOREX.r2.7HG0604200,HORVU.MOREX.r2.2HG0109440,HORVU.MOREX.r2.1HG0001030,HORVU.MOREX.r2.7HG0603640,HORVU.MOREX.r2.1HG0003070,HORVU.MOREX.r2.5HG0432060,HORVU.MOREX.r2.5HG0432030,HORVU.MOREX.r2.5HG0432230,HORVU.MOREX.r2.1HG0003500,HORVU.MOREX.r2.1HG0003750,HORVU.MOREX.r2.1HG0004200,HORVU.MOREX.r2.5HG0432200,HORVU.MOREX.r2.7HG0603900,HORVU.MOREX.r2.5HG0432490,HORVU.MOR…	HORVU.MOREX.r2.5HG0423810,HORVU.MOREX.r2.2HG0107860,HORVU.MOREX.r2.7HG0544560,HORVU.MOREX.r2.5HG0438880,HORVU.MOREX.r2.7HG0607180,HORVU.MOREX.r2.1HG0043550,HORVU.MOREX.r2.1HG0066370,HORVU.MOREX.r2.7HG0596870,HORVU.MOREX.r2.3HG0222260,HORVU.MOREX.r2.4HG0316160,HORVU.MOREX.r2.4HG0335030	HORVU.MOREX.r2.5HG0423810,HORVU.MOREX.r2.2HG0107860,HORVU.MOREX.r2.7HG0544560,HORVU.MOREX.r2.5HG0438880,HORVU.MOREX.r2.7HG0607180,HORVU.MOREX.r2.3HG0213430,HORVU.MOREX.r2.6HG0508450,HORVU.MOREX.r2.1HG0043550,HORVU.MOREX.r2.1HG0066370,HORVU.MOREX.r2.7HG0596870,HORVU.MOREX.r2.5HG0365650,HORVU.MOREX.r2.2HG0166160,HORVU.MOREX.r2.6HG0512020,HORVU.MOREX.r2.1HG0023040,HORVU.MOREX.r2.3HG0222260,HORVU.MOR…	0.692583	0.830673	0.716306
199	25	31	0	9	11	HORVU.MOREX.r2.3HG0184850,HORVU.MOREX.r2.2HG0153760,HORVU.MOREX.r2.5HG0357350,HORVU.MOREX.r2.5HG0356760,HORVU.MOREX.r2.7HG0539070,HORVU.MOREX.r2.3HG0184880,HORVU.MOREX.r2.2HG0153610,HORVU.MOREX.r2.1HG0072140,HORVU.MOREX.r2.3HG0185170	HORVU.MOREX.r2.3HG0185120,HORVU.MOREX.r2.2HG0153690,HORVU.MOREX.r2.2HG0154300,HORVU.MOREX.r2.5HG0356590,HORVU.MOREX.r2.3HG0210080,HORVU.MOREX.r2.5HG0357460,HORVU.MOREX.r2.5HG0356770,HORVU.MOREX.r2.1HG0071530,HORVU.MOREX.r2.7HG0539040,HORVU.MOREX.r2.7HG0539050,HORVU.MOREX.r2.3HG0185430	HORVU.MOREX.r2.3HG0185120,HORVU.MOREX.r2.2HG0153690,HORVU.MOREX.r2.2HG0154300,HORVU.MOREX.r2.1HG0062240,HORVU.MOREX.r2.5HG0356590,HORVU.MOREX.r2.7HG0539040,HORVU.MOREX.r2.2HG0147780,HORVU.MOREX.r2.3HG0210080,HORVU.MOREX.r2.2HG0161980,HORVU.MOREX.r2.5HG0357460,HORVU.MOREX.r2.5HG0356770,HORVU.MOREX.r2.1HG0026060,HORVU.MOREX.r2.1HG0071530,HORVU.MOREX.r2.5HG0397320,HORVU.MOREX.r2.7HG0539050,HORVU.MOR…	0.692583	0.830673	0.716306
200	26	67	0	27	14	HORVU.MOREX.r2.5HG0424830,HORVU.MOREX.r2.4HG0335240,HORVU.MOREX.r2.5HG0424740,HORVU.MOREX.r2.5HG0423680,HORVU.MOREX.r2.5HG0424260,HORVU.MOREX.r2.1HG0078200,HORVU.MOREX.r2.1HG0078540,HORVU.MOREX.r2.5HG0423510,HORVU.MOREX.r2.1HG0078080,HORVU.MOREX.r2.5HG0424020,HORVU.MOREX.r2.1HG0078050,HORVU.MOREX.r2.1HG0003500,HORVU.MOREX.r2.5HG0425200,HORVU.MOREX.r2.1HG0003400,HORVU.MOREX.r2.5HG0440460,HORVU.MOR…	HORVU.MOREX.r2.2HG0103440,HORVU.MOREX.r2.2HG0105280,HORVU.MOREX.r2.3HG0253920,HORVU.MOREX.r2.5HG0440080,HORVU.MOREX.r2.4HG0322680,HORVU.MOREX.r2.7HG0585590,HORVU.MOREX.r2.5HG0425750,HORVU.MOREX.r2.4HG0334050,HORVU.MOREX.r2.3HG0263170,HORVU.MOREX.r2.7HG0618110,HORVU.MOREX.r2.4HG0335180,HORVU.MOREX.r2.3HG0196590,HORVU.MOREX.r2.2HG0171010,HORVU.MOREX.r2.5HG0423530	HORVU.MOREX.r2.2HG0103440,HORVU.MOREX.r2.2HG0105280,HORVU.MOREX.r2.3HG0253920,HORVU.MOREX.r2.5HG0440080,HORVU.MOREX.r2.2HG0173820,HORVU.MOREX.r2.6HG0464140,HORVU.MOREX.r2.7HG0617630,HORVU.MOREX.r2.4HG0322680,HORVU.MOREX.r2.7HG0585590,HORVU.MOREX.r2.5HG0431450,HORVU.MOREX.r2.5HG0425750,HORVU.MOREX.r2.4HG0334050,HORVU.MOREX.r2.7HG0594550,HORVU.MOREX.r2.3HG0263170,HORVU.MOREX.r2.7HG0618110,HORVU.MOR…	0.695543	1.23469	0.716306
201	26	139	0	22	14	HORVU.MOREX.r2.4HG0288360,HORVU.MOREX.r2.2HG0170020,HORVU.MOREX.r2.7HG0617840,HORVU.MOREX.r2.2HG0171170,HORVU.MOREX.r2.7HG0618210,HORVU.MOREX.r2.4HG0287820,HORVU.MOREX.r2.2HG0170590,HORVU.MOREX.r2.7HG0618830,HORVU.MOREX.r2.1HG0003500,HORVU.MOREX.r2.4HG0288290,HORVU.MOREX.r2.1HG0003400,HORVU.MOREX.r2.4HG0290700,HORVU.MOREX.r2.7HG0618130,HORVU.MOREX.r2.7HG0618390,HORVU.MOREX.r2.4HG0291490,HORVU.MOR…	HORVU.MOREX.r2.4HG0288500,HORVU.MOREX.r2.2HG0170070,HORVU.MOREX.r2.4HG0320930,HORVU.MOREX.r2.4HG0289390,HORVU.MOREX.r2.4HG0304400,HORVU.MOREX.r2.4HG0289490,HORVU.MOREX.r2.4HG0288410,HORVU.MOREX.r2.4HG0323730,HORVU.MOREX.r2.6HG0500510,HORVU.MOREX.r2.4HG0289350,HORVU.MOREX.r2.4HG0288260,HORVU.MOREX.r2.3HG0198650,HORVU.MOREX.r2.4HG0288590,HORVU.MOREX.r2.4HG0287840	HORVU.MOREX.r2.4HG0288500,HORVU.MOREX.r2.2HG0170070,HORVU.MOREX.r2.4HG0320930,HORVU.MOREX.r2.4HG0289390,HORVU.MOREX.r2.4HG0304400,HORVU.MOREX.r2.4HG0287840,HORVU.MOREX.r2.4HG0288410,HORVU.MOREX.r2.4HG0323730,HORVU.MOREX.r2.4HG0281160,HORVU.MOREX.r2.4HG0289490,HORVU.MOREX.r2.6HG0500510,HORVU.MOREX.r2.4HG0289350,HORVU.MOREX.r2.4HG0288260,HORVU.MOREX.r2.3HG0198650,HORVU.MOREX.r2.4HG0288590,HORVU.MOR…	0.695543	1.23469	0.716306
202	33	56	0	11	15	HORVU.MOREX.r2.3HG0182360,HORVU.MOREX.r2.2HG0087670,HORVU.MOREX.r2.2HG0087620,HORVU.MOREX.r2.1HG0003750,HORVU.MOREX.r2.1HG0003070,HORVU.MOREX.r2.1HG0003500,HORVU.MOREX.r2.3HG0182040,HORVU.MOREX.r2.1HG0006400,HORVU.MOREX.r2.3HG0181430,HORVU.MOREX.r2.3HG0181420,HORVU.MOREX.r2.1HG0003400	HORVU.MOREX.r2.2HG0087750,HORVU.MOREX.r2.7HG0548360,HORVU.MOREX.r2.3HG0181540,HORVU.MOREX.r2.2HG0086020,HORVU.MOREX.r2.2HG0087460,HORVU.MOREX.r2.4HG0312900,HORVU.MOREX.r2.1HG0000070,HORVU.MOREX.r2.1HG0026230,HORVU.MOREX.r2.3HG0255420,HORVU.MOREX.r2.1HG0014120,HORVU.MOREX.r2.2HG0085980,HORVU.MOREX.r2.1HG0006250,HORVU.MOREX.r2.2HG0086010,HORVU.MOREX.r2.1HG0006010,HORVU.MOREX.r2.1HG0005400	HORVU.MOREX.r2.2HG0087750,HORVU.MOREX.r2.2HG0086020,HORVU.MOREX.r2.4HG0312900,HORVU.MOREX.r2.4HG0329300,HORVU.MOREX.r2.2HG0085980,HORVU.MOREX.r2.1HG0006010,HORVU.MOREX.r2.4HG0340650,HORVU.MOREX.r2.7HG0548360,HORVU.MOREX.r2.2HG0180170,HORVU.MOREX.r2.3HG0252650,HORVU.MOREX.r2.3HG0255420,HORVU.MOREX.r2.7HG0608870,HORVU.MOREX.r2.1HG0006250,HORVU.MOREX.r2.1HG0014120,HORVU.MOREX.r2.2HG0087460,HORVU.MOR…	0.731305	0.881057	0.749407
203	37	256	0	20	19	HORVU.MOREX.r2.5HG0398040,HORVU.MOREX.r2.5HG0393410,HORVU.MOREX.r2.5HG0395560,HORVU.MOREX.r2.5HG0398100,HORVU.MOREX.r2.5HG0396840,HORVU.MOREX.r2.5HG0397830,HORVU.MOREX.r2.5HG0398060,HORVU.MOREX.r2.5HG0396550,HORVU.MOREX.r2.5HG0394730,HORVU.MOREX.r2.1HG0003070,HORVU.MOREX.r2.5HG0393650,HORVU.MOREX.r2.5HG0398680,HORVU.MOREX.r2.5HG0396910,HORVU.MOREX.r2.5HG0394700,HORVU.MOREX.r2.5HG0398400,HORVU.MOR…	HORVU.MOREX.r2.5HG0397800,HORVU.MOREX.r2.5HG0393330,HORVU.MOREX.r2.5HG0393830,HORVU.MOREX.r2.5HG0398110,HORVU.MOREX.r2.5HG0398020,HORVU.MOREX.r2.5HG0397000,HORVU.MOREX.r2.5HG0386120,HORVU.MOREX.r2.5HG0395330,HORVU.MOREX.r2.5HG0396040,HORVU.MOREX.r2.5HG0397790,HORVU.MOREX.r2.5HG0393890,HORVU.MOREX.r2.5HG0395050,HORVU.MOREX.r2.3HG0229090,HORVU.MOREX.r2.5HG0398710,HORVU.MOREX.r2.5HG0411410,HORVU.MOR…	HORVU.MOREX.r2.5HG0397800,HORVU.MOREX.r2.5HG0393330,HORVU.MOREX.r2.5HG0393830,HORVU.MOREX.r2.5HG0398110,HORVU.MOREX.r2.5HG0398020,HORVU.MOREX.r2.5HG0397000,HORVU.MOREX.r2.6HG0522750,HORVU.MOREX.r2.5HG0386120,HORVU.MOREX.r2.5HG0395330,HORVU.MOREX.r2.5HG0396040,HORVU.MOREX.r2.5HG0397790,HORVU.MOREX.r2.5HG0393890,HORVU.MOREX.r2.5HG0395050,HORVU.MOREX.r2.3HG0229090,HORVU.MOREX.r2.5HG0398710,HORVU.MOR…	0.745144	1.11694	0.759826
204	32	50	0	11	15	HORVU.MOREX.r2.3HG0259240,HORVU.MOREX.r2.1HG0061240,HORVU.MOREX.r2.3HG0213500,HORVU.MOREX.r2.3HG0259440,HORVU.MOREX.r2.4HG0316430,HORVU.MOREX.r2.1HG0056240,HORVU.MOREX.r2.1HG0003070,HORVU.MOREX.r2.1HG0058820,HORVU.MOREX.r2.1HG0003500,HORVU.MOREX.r2.1HG0003400,HORVU.MOREX.r2.3HG0259660	HORVU.MOREX.r2.1HG0056790,HORVU.MOREX.r2.3HG0260190,HORVU.MOREX.r2.1HG0058960,HORVU.MOREX.r2.3HG0259290,HORVU.MOREX.r2.3HG0259230,HORVU.MOREX.r2.1HG0056370,HORVU.MOREX.r2.1HG0056280,HORVU.MOREX.r2.3HG0258920,HORVU.MOREX.r2.1HG0057670,HORVU.MOREX.r2.3HG0259860,HORVU.MOREX.r2.1HG0060860,HORVU.MOREX.r2.1HG0061200,HORVU.MOREX.r2.1HG0060690,HORVU.MOREX.r2.1HG0056300,HORVU.MOREX.r2.3HG0259300	HORVU.MOREX.r2.1HG0020280,HORVU.MOREX.r2.3HG0259860,HORVU.MOREX.r2.1HG0058960,HORVU.MOREX.r2.3HG0259290,HORVU.MOREX.r2.2HG0133260,HORVU.MOREX.r2.3HG0259230,HORVU.MOREX.r2.1HG0065910,HORVU.MOREX.r2.1HG0056370,HORVU.MOREX.r2.1HG0056790,HORVU.MOREX.r2.5HG0440780,HORVU.MOREX.r2.1HG0056280,HORVU.MOREX.r2.3HG0258920,HORVU.MOREX.r2.1HG0057670,HORVU.MOREX.r2.3HG0260190,HORVU.MOREX.r2.1HG0060860,HORVU.MOR…	0.861581	0.933069	0.874252
205	37	83	0	18	17	HORVU.MOREX.r2.5HG0350790,HORVU.MOREX.r2.3HG0262130,HORVU.MOREX.r2.1HG0003750,HORVU.MOREX.r2.2HG0092100,HORVU.MOREX.r2.1HG0003070,HORVU.MOREX.r2.3HG0262060,HORVU.MOREX.r2.5HG0350770,HORVU.MOREX.r2.5HG0350450,HORVU.MOREX.r2.3HG0260630,HORVU.MOREX.r2.5HG0350990,HORVU.MOREX.r2.1HG0003500,HORVU.MOREX.r2.2HG0092260,HORVU.MOREX.r2.2HG0092580,HORVU.MOREX.r2.5HG0349820,HORVU.MOREX.r2.3HG0261470,HORVU.MOR…	HORVU.MOREX.r2.5HG0396150,HORVU.MOREX.r2.5HG0350570,HORVU.MOREX.r2.5HG0350440,HORVU.MOREX.r2.5HG0350870,HORVU.MOREX.r2.3HG0262820,HORVU.MOREX.r2.5HG0350120,HORVU.MOREX.r2.5HG0431390,HORVU.MOREX.r2.2HG0090390,HORVU.MOREX.r2.3HG0261560,HORVU.MOREX.r2.5HG0350230,HORVU.MOREX.r2.3HG0261390,HORVU.MOREX.r2.3HG0261010,HORVU.MOREX.r2.3HG0262320,HORVU.MOREX.r2.3HG0256850,HORVU.MOREX.r2.3HG0261310,HORVU.MOR…	HORVU.MOREX.r2.5HG0396150,HORVU.MOREX.r2.5HG0350570,HORVU.MOREX.r2.4HG0307760,HORVU.MOREX.r2.5HG0350120,HORVU.MOREX.r2.6HG0514290,HORVU.MOREX.r2.5HG0350230,HORVU.MOREX.r2.5HG0410830,HORVU.MOREX.r2.3HG0262320,HORVU.MOREX.r2.2HG0090390,HORVU.MOREX.r2.5HG0350870,HORVU.MOREX.r2.3HG0262820,HORVU.MOREX.r2.5HG0431390,HORVU.MOREX.r2.3HG0256850,HORVU.MOREX.r2.3HG0261560,HORVU.MOREX.r2.6HG0453470,HORVU.MOR…	0.869422	0.898699	0.877904
206	37	231	0	21	18	HORVU.MOREX.r2.7HG0582310,HORVU.MOREX.r2.7HG0591940,HORVU.MOREX.r2.7HG0588640,HORVU.MOREX.r2.1HG0003070,HORVU.MOREX.r2.7HG0589750,HORVU.MOREX.r2.7HG0583550,HORVU.MOREX.r2.7HG0591410,HORVU.MOREX.r2.1HG0003400,HORVU.MOREX.r2.7HG0591540,HORVU.MOREX.r2.7HG0568570,HORVU.MOREX.r2.1HG0003500,HORVU.MOREX.r2.7HG0592120,HORVU.MOREX.r2.7HG0582650,HORVU.MOREX.r2.7HG0582810,HORVU.MOREX.r2.7HG0568920,HORVU.MOR…	HORVU.MOREX.r2.7HG0590880,HORVU.MOREX.r2.7HG0589160,HORVU.MOREX.r2.7HG0589680,HORVU.MOREX.r2.7HG0589040,HORVU.MOREX.r2.7HG0593190,HORVU.MOREX.r2.7HG0569130,HORVU.MOREX.r2.5HG0360550,HORVU.MOREX.r2.7HG0586180,HORVU.MOREX.r2.7HG0581870,HORVU.MOREX.r2.7HG0593770,HORVU.MOREX.r2.7HG0585630,HORVU.MOREX.r2.7HG0581770,HORVU.MOREX.r2.7HG0568990,HORVU.MOREX.r2.7HG0589960,HORVU.MOREX.r2.7HG0590660,HORVU.MOR…	HORVU.MOREX.r2.7HG0589160,HORVU.MOREX.r2.7HG0589680,HORVU.MOREX.r2.7HG0589040,HORVU.MOREX.r2.7HG0593190,HORVU.MOREX.r2.7HG0569130,HORVU.MOREX.r2.5HG0360550,HORVU.MOREX.r2.7HG0586180,HORVU.MOREX.r2.7HG0581870,HORVU.MOREX.r2.7HG0590880,HORVU.MOREX.r2.7HG0590660,HORVU.MOREX.r2.5HG0396740,HORVU.MOREX.r2.7HG0585630,HORVU.MOREX.r2.7HG0568990,HORVU.MOREX.r2.7HG0589960,HORVU.MOREX.r2.7HG0581770,HORVU.MOR…	1	1.00205	1
207	21	32	0	15	10	HORVU.MOREX.r2.7HG0553840,HORVU.MOREX.r2.7HG0552580,HORVU.MOREX.r2.4HG0335240,HORVU.MOREX.r2.4HG0334770,HORVU.MOREX.r2.7HG0554850,HORVU.MOREX.r2.1HG0003070,HORVU.MOREX.r2.4HG0286540,HORVU.MOREX.r2.7HG0552160,HORVU.MOREX.r2.7HG0551080,HORVU.MOREX.r2.1HG0003500,HORVU.MOREX.r2.2HG0162750,HORVU.MOREX.r2.7HG0553740,HORVU.MOREX.r2.7HG0554060,HORVU.MOREX.r2.7HG0615210,HORVU.MOREX.r2.1HG0003400	HORVU.MOREX.r2.2HG0136670,HORVU.MOREX.r2.2HG0127360,HORVU.MOREX.r2.2HG0162650,HORVU.MOREX.r2.2HG0161670,HORVU.MOREX.r2.3HG0221240,HORVU.MOREX.r2.2HG0135150,HORVU.MOREX.r2.4HG0319700,HORVU.MOREX.r2.2HG0165630,HORVU.MOREX.r2.7HG0551130,HORVU.MOREX.r2.5HG0386390	HORVU.MOREX.r2.2HG0136670,HORVU.MOREX.r2.2HG0127360,HORVU.MOREX.r2.2HG0162650,HORVU.MOREX.r2.2HG0089140,HORVU.MOREX.r2.2HG0161670,HORVU.MOREX.r2.3HG0221240,HORVU.MOREX.r2.2HG0135150,HORVU.MOREX.r2.4HG0319700,HORVU.MOREX.r2.2HG0165630,HORVU.MOREX.r2.4HG0295830,HORVU.MOREX.r2.1HG0066050,HORVU.MOREX.r2.6HG0511220,HORVU.MOREX.r2.5HG0404730,HORVU.MOREX.r2.7HG0551130,HORVU.MOREX.r2.1HG0032940,HORVU.MOR…	1	0.96148	1

## Sheet: DM DE genes
Gene	Group	Description
HORVU.MOREX.r2.1HG0000740	16HAI	Charged multivesicular body protein 5
HORVU.MOREX.r2.1HG0006350	16HAI	Agamous MADS-box transcription factor
HORVU.MOREX.r2.1HG0019760	32HAI	Dihydrolipoyl dehydrogenase
HORVU.MOREX.r2.1HG0067490	32HAI	Malate dehydrogenase
HORVU.MOREX.r2.1HG0068430	32HAI	Threonine synthase
HORVU.MOREX.r2.1HG0071870	16HAI	Calcium binding
HORVU.MOREX.r2.1HG0073890	32HAI	Chalcone synthase
HORVU.MOREX.r2.1HG0073960	32HAI	O-methyltransferase
HORVU.MOREX.r2.2HG0083720	16HAI	Sugar transporter, putative
HORVU.MOREX.r2.2HG0086780	16HAI	SNARE-interacting protein KEULE
HORVU.MOREX.r2.2HG0088020	32HAI	2-oxoglutarate dehydrogenase E1 component family protein
HORVU.MOREX.r2.2HG0088730	32HAI	26S protease regulatory subunit
HORVU.MOREX.r2.2HG0090250	32HAI	Lon protease homolog
HORVU.MOREX.r2.2HG0102880	32HAI	Aminotransferase
HORVU.MOREX.r2.2HG0110730	16HAI	Protein DETOXIFICATION
HORVU.MOREX.r2.2HG0129090	32HAI	Protein DETOXIFICATION
HORVU.MOREX.r2.2HG0137960	16HAI	U-box domain-containing family protein
HORVU.MOREX.r2.2HG0140830	32HAI	Glutathione S-transferase family protein isoform 2
HORVU.MOREX.r2.2HG0142760	32HAI	Alpha-ketoglutarate-dependent dioxygenase alkB-like protein 2
HORVU.MOREX.r2.2HG0147250	32HAI	Chitinase
HORVU.MOREX.r2.2HG0161390	32HAI	Vacuolar cation/proton exchanger, putative
HORVU.MOREX.r2.2HG0166780	32HAI	Cytochrome P450 family protein
HORVU.MOREX.r2.2HG0167330	32HAI	Serine hydroxymethyltransferase
HORVU.MOREX.r2.2HG0169770	32HAI	D-3-phosphoglycerate dehydrogenase
HORVU.MOREX.r2.2HG0177320	16HAI	Actin-related protein
HORVU.MOREX.r2.2HG0180900	32HAI	Fatty acid hydroxylase superfamily protein
HORVU.MOREX.r2.3HG0194060	32HAI	Raffinose synthase family protein
HORVU.MOREX.r2.3HG0196440	16HAI	ATP-dependent 6-phosphofructokinase
HORVU.MOREX.r2.3HG0199680	32HAI	Glycosyltransferase
HORVU.MOREX.r2.3HG0202100	32HAI	Subtilisin-like protease
HORVU.MOREX.r2.3HG0202130	32HAI	Subtilisin-like protease
HORVU.MOREX.r2.3HG0221130	32HAI	Pentatricopeptide repeat-containing protein
HORVU.MOREX.r2.3HG0221260	16HAI	Calmodulin-binding protein
HORVU.MOREX.r2.3HG0233570	32HAI	Chitinase
HORVU.MOREX.r2.3HG0238770	32HAI	ATP-dependent 6-phosphofructokinase
HORVU.MOREX.r2.3HG0254340	32HAI	Fructose-bisphosphate aldolase
HORVU.MOREX.r2.3HG0260920	32HAI	Aspartokinase
HORVU.MOREX.r2.3HG0261450	Core	Alcohol dehydrogenase, putative
HORVU.MOREX.r2.3HG0262620	32HAI	Leucine-rich repeat receptor-like protein kinase family protein
HORVU.MOREX.r2.3HG0265320	16HAI	Mitochondrial import inner membrane translocase subunit TIM16
HORVU.MOREX.r2.3HG0266890	32HAI	U-box domain-containing protein
HORVU.MOREX.r2.3HG0269660	32HAI	Signal recognition particle protein
HORVU.MOREX.r2.3HG0270820	32HAI	Progesterone 5-beta-reductase
HORVU.MOREX.r2.4HG0324220	32HAI	Anthranilate synthase
HORVU.MOREX.r2.4HG0334150	32HAI	Phosphoserine aminotransferase
HORVU.MOREX.r2.4HG0336500	32HAI	Pyridoxal 5'-phosphate synthase subunit PdxT
HORVU.MOREX.r2.4HG0338770	32HAI	transmembrane protein
HORVU.MOREX.r2.4HG0338920	32HAI	60 kDa chaperonin
HORVU.MOREX.r2.4HG0339550	32HAI	Cytochrome P450, putative
HORVU.MOREX.r2.4HG0341130	32HAI	Kinase, putative
HORVU.MOREX.r2.4HG0341190	16HAI	Respiratory burst oxidase homolog
HORVU.MOREX.r2.4HG0342490	32HAI	Anthranilate phosphoribosyltransferase
HORVU.MOREX.r2.5HG0352570	32HAI	Cysteine synthase
HORVU.MOREX.r2.5HG0353220	16HAI	N-carbamoylputrescine amidase
HORVU.MOREX.r2.5HG0357890	Core	Kinase, putative
HORVU.MOREX.r2.5HG0358060	16HAI	Kinase, putative
HORVU.MOREX.r2.5HG0364830	16HAI	Protein phosphatase 2C-like protein
HORVU.MOREX.r2.5HG0368610	16HAI	GPI ethanolamine phosphate transferase
HORVU.MOREX.r2.5HG0375640	16HAI	Diacylglycerol kinase
HORVU.MOREX.r2.5HG0389190	32HAI	Indole-3-glycerol phosphate synthase
HORVU.MOREX.r2.5HG0391760	32HAI	Phosphoenolpyruvate carboxylase
HORVU.MOREX.r2.5HG0397720	32HAI	Secretory carrier-associated membrane protein
HORVU.MOREX.r2.5HG0406700	32HAI	Peptidylprolyl isomerase
HORVU.MOREX.r2.5HG0413940	32HAI	Pseudo response regulator
HORVU.MOREX.r2.5HG0414290	32HAI	Histone H2A
HORVU.MOREX.r2.5HG0414970	16HAI	1-phosphatidylinositol phosphodiesterase
HORVU.MOREX.r2.5HG0415550	32HAI	3-dehydroquinate synthase
HORVU.MOREX.r2.5HG0418360	32HAI	O-acyltransferase WSD1
HORVU.MOREX.r2.5HG0419720	16HAI	NADPH--cytochrome P450 reductase
HORVU.MOREX.r2.5HG0422890	16HAI	Lipoxygenase
HORVU.MOREX.r2.6HG0450400	32HAI	Aspartate aminotransferase
HORVU.MOREX.r2.6HG0450620	32HAI	Acetyltransferase component of pyruvate dehydrogenase complex
HORVU.MOREX.r2.6HG0451800	Core	Receptor-like protein kinase
HORVU.MOREX.r2.6HG0454780	16HAI	Kinase family protein
HORVU.MOREX.r2.6HG0461610	32HAI	Calreticulin/calnexin
HORVU.MOREX.r2.6HG0471210	16HAI	WRKY transcription factor
HORVU.MOREX.r2.6HG0474240	32HAI	Phosphoglycerate kinase
HORVU.MOREX.r2.6HG0496940	16HAI	Kinase family protein
HORVU.MOREX.r2.6HG0498710	32HAI	S-adenosylmethionine synthase
HORVU.MOREX.r2.6HG0498830	32HAI	S-adenosylmethionine synthase
HORVU.MOREX.r2.6HG0500330	16HAI	Protein DETOXIFICATION
HORVU.MOREX.r2.6HG0501260	32HAI	Germin-like protein
HORVU.MOREX.r2.6HG0510100	16HAI	Sphingoid base hydroxylase 2
HORVU.MOREX.r2.6HG0514200	32HAI	Allene oxide cyclase
HORVU.MOREX.r2.6HG0515710	16HAI	Protein TONSOKU
HORVU.MOREX.r2.6HG0515910	32HAI	26S protease regulatory subunit
HORVU.MOREX.r2.6HG0516400	32HAI	Glutamate receptor
HORVU.MOREX.r2.6HG0516930	32HAI	Sugar transporter, putative
HORVU.MOREX.r2.7HG0529200	32HAI	MLO-like protein
HORVU.MOREX.r2.7HG0535070	32HAI	Succinate dehydrogenase subunit 5, mitochondrial
HORVU.MOREX.r2.7HG0535730	32HAI	3-phosphoshikimate 1-carboxyvinyltransferase
HORVU.MOREX.r2.7HG0540760	16HAI	ATP-dependent 6-phosphofructokinase
HORVU.MOREX.r2.7HG0541070	32HAI	Proteasome subunit beta type
HORVU.MOREX.r2.7HG0547700	16HAI	Cyclic nucleotide-gated channel
HORVU.MOREX.r2.7HG0547730	Core	Glutamate receptor
HORVU.MOREX.r2.7HG0554840	32HAI	Pyrophosphate--fructose 6-phosphate 1-phosphotransferase subunit beta
HORVU.MOREX.r2.7HG0555260	32HAI	SOUL heme-binding protein
HORVU.MOREX.r2.7HG0562220	16HAI	Acetylglutamate kinase
HORVU.MOREX.r2.7HG0576290	32HAI	Bifunctional nuclease
HORVU.MOREX.r2.7HG0582550	32HAI	Tryptophan synthase beta chain
HORVU.MOREX.r2.7HG0615950	Core	Protein kinase
HORVU.MOREX.r2.7HG0616250	16HAI	WRKY transcription factor
HORVU.MOREX.r2.7HG0617050	Core	Kinase, putative
HORVU.MOREX.r2.7HG0623060	Core	Aquaporin
